# Supplementary material
Source: publisher figshare collection journal article supplement (https://gsapubs.figshare.com/articles/dataset/_/15023364)
Supplement: Supplementary file 1 [file 2]

## Sheet: Sample locations
Locality	Formation	Sample #	Domain	Latitude	Longitude	Reference
Auber Villiers main block	Auber Villiers sample 1	AV-1	West-Central Domain	-25.875711°	30.983131°	this study
Auber Villiers main block	Auber Villiers sample 2	AV-2	West-Central Domain	-25.882050°	30.977250°	this study
Auber Villiers main block	Auber Villiers sample 3	AV-3	West-Central Domain	-25.882789°	30.995019°	this study
Belt #4	Mapepe Formation	B4-1	West-Central Domain	-25.90761°	31.01857°	this study
Belt South of Inyoka Fault	Mapepe Formation	NAD-105	West-Central Domain	-25.873230°	30.941890°	this study
Belt South of Inyoka Fault	Mapepe Formation	NAD-185-12-1	West-Central Domain	-25.864890°	30.966820°	this study
Belt South of Inyoka Fault	Mapepe Formation	NAD-185-3	West-Central Domain	-25.867990°	30.985170°	this study
Belt South of Inyoka Fault	Mapepe Formation	NAD-185-8	West-Central Domain	-25.866720°	30.985400°	this study
Brommer Syncline	Sheba Formation	BS-1	Northern Domain	-25.854570°	30.998000°	this study
Brommer Syncline	Sheba Formation	BS-3	Northern Domain	-25.853420°	30.992220°	this study
Conglomerate Hill	Mapepe Formation	CH-20	West-Central Domain	-25.897820°	30.937560°	this study
Conglomerate Hill	Mapepe Formation	NAD-103	West-Central Domain	-25.89716°	30.938250°	this study
Conglomerate Hill	Mapepe Formation	NAD-104	West-Central Domain	-25.899200°	30.937760°	Drabon et al. 2017
Eastern Barite Valley	Mapepe Formation	BARB5-DZ1	East-Central Domain	-25.907349°	31.058734°	Drabon et al. 2017
Eastern Barite Valley	Mapepe Formation	BARB5-DZ2	East-Central Domain	-25.907349°	31.058734°	Drabon et al. 2017
	Mapepe Formation	BARB5-DZ3	East-Central Domain	-25.907349°	31.058734°	Drabon et al. 2017
	Mapepe Formation	BARB5-DZ4	East-Central Domain	-25.907349°	31.058734°	Drabon et al. 2017
Eastern Barite Valley	Mapepe Formation	BARB5-DZ5	East-Central Domain	-25.907349°	31.058734°	Drabon et al. 2017
Emlembe Syncline	Mapepe Formation	JAH676-1	East-Central Domain	-25.929467°	31.116550°	Harrington 2017
Emlembe Syncline	Mapepe Formation	JH14-1	East-Central Domain	-25.925317°	31.120150°	Harrington 2017
Greywacke Hill	Mapepe Formation	GH-1	West-Central Domain	-25.907090°	30.925800°	this study
Greywacke Hill	Mapepe Formation: Yellow Tuff	GH-15	West-Central Domain	-25.908861°	30.913150°	this study
Greywacke Hill	Mapepe Formation: S2	GH-16	West-Central Domain	-25.908861°	30.913150°	this study
Greywacke Hill	Mapepe Formation	GH-7	West-Central Domain	-25.906410°	30.925470°	this study
Greywacke Hill	Mapepe Fm./Fig Tree Gp.	SAF-674-1	West-Central Domain	-25.902786°	30.934667°	Drabon et al. 2017
Intrusion #1 (Mudstone Porphyry)	Fig Tree intrusive	FI-1	West-Central Domain	-25.909250°	30.921069°	this study
Intusion #2 (Ironstone pods)	Fig Tree intrusive	FI-2	West-Central Domain	-25.909990°	30.928820°	this study
Intusion #4 (Dons pink igneous)	Fig Tree intrusive	FI-4	West-Central Domain	-25.905140°	31.016390°	this study
Intusion #5 (N of cabin)	Fig Tree intrusive	FI-5	West-Central Domain	-25.916030°	30.931840°	this study
Manzimnyama Syncline	Top Manzimnyama Syncline	MS-1	East-Central Domain	-25.306600°	31.098770°	this study
Manzimnyama Syncline	Mapepe Formation: Loenen member	NAD-101	East-Central Domain	-25.911092°	31.084158°	Drabon et al. 2019
Manzimnyama Syncline	Mapepe Fm./Fig Tree Gp.	SAF-600-3	East-Central Domain	-25.906417°	31.096874°	Drabon et al. 2019
Manzimnyama Syncline	Mapepe Fm./Fig Tree Gp.	BARB4-DZ1	East-Central Domain	-25.906692°	31.096708°	Drabon et al. 2019
Manzimnyama Syncline	Mapepe Fm./Fig Tree Gp.	BARB4-DZ2	East-Central Domain	-25.906692°	31.096708°	Drabon et al. 2019
Moodies Hills Block	Moodies on Moodies Hills Block	MdQ-1	West-Central Domain	-25.837330°	30.990700°	this study
Paulus Syncline	Mapepe Formation	PS-21	East-Central Domain	-25.928050°	31.103040°	this study
Paulus Syncline Central	Mapepe Formation	JAH-663-16	East-Central Domain	-25.927586°	31.104450°	Harrington 2017
Paulus Syncline Central	Mapepe Formation	JAH-664-14	East-Central Domain	-25.928300°	31.104483°	Harrington 2017
Paulus Syncline North	Mapepe Formation	JH01-7	East-Central Domain	-25.922933°	31.107483°	Harrington 2017
Paulus Syncline South	Mapepe Formation	JAH-663-15	East-Central Domain	-25.927867°	31.104867°	Harrington 2017
Powerline Road Syncline	Moodies/undifferentiated	PRS-1	West-Central Domain	-25.887050°	31.011960°	this study
Remote Belt	Mapepe Formation	B2-1	West-Central Domain	-25.885506°	30.941857°	this study
Remote Belt	Mapepe Formation: cgl clast	B2-11	West-Central Domain	-25.885500°	30.942210°	this study
Remote Belt	Remote Beld sandstone matrix	B2-18	West-Central Domain	-25.885310°	30.942850°	this study
Remote Belt	Remore belt cgl clast	B2-19	West-Central Domain	-25.885310°	30.942850°	this study
Remote Belt	Mapepe Formation	B2-2	West-Central Domain	-25.885470°	30.94176°	this study
Remote Belt	Mapepe Formation/Loenen member	B2-9	West-Central Domain	-25.886790°	30.94261°	this study
S2	Fig Tree Gp.	EBV-S2-1	East-Central Domain	-25.912115°	31.061411°	this study
S2	Fig Tree Gp.	NAD-41	West-Central Domain	-25.896861°	31.016972°	Drabon et al. 2017
S2	Fig Tree Gp.	NAD-4-33	Southern Domain	-25.915232°	30.932732°	Drabon et al. 2017
S2	Fig Tree Gp.	SA 310	West-Central Domain	-25.906617°	31.024489°	Drabon et al. 2017
S2	Fig Tree Gp.	SA 514	West-Central Domain	-25.909017°	31.015800°	Drabon et al. 2017
S2	Fig Tree Gp.	SA 555	West-Central Domain	-25.898586°	31.021442°	Drabon et al. 2017
S2	Fig Tree Gp., barite immediately above S2	WBV-1	East-Central Domain	-25.908670°	31.053900°	this study
S2	Fig Tree Gp.	NAD-22-U	West-Central Domain	-25.900841°	31.006081°	Drabon et al. 2017
S3	Fig Tree Gp.	BSoI-S3-1	West-Central Domain	-25.873970°	30.949690°	this study
S3	Fig Tree Gp.	EBV-S3-1	East-Central Domain	-25.907534°	31.060874°	this study
S3	Fig Tree Gp.	SA 306	Southern Domain	-25.916627°	31.018968°	Drabon et al. 2017
S3	Fig Tree Gp.	SA 314	Northern Domain	-25.770458°	31.101903°	Drabon et al. 2017
S3	Fig Tree Gp.	SA 326	West-Central Domain	-25.873939°	30.948916°	Drabon et al. 2017
S3	Fig Tree Gp.	SA 505	Southern Domain	-25.873939°	30.948916°	Drabon et al. 2017
S3	Fig Tree Gp.	SA 515	Northern Domain	-25.828217°	30.911800°	Drabon et al. 2017
S3	Fig Tree Gp.	SA 517	Northern Domain	-25.845867°	30.923867°	Drabon et al. 2017
S3	Fig Tree Gp.	SA 528	Northern Domain	-25.887917°	31.056417°	Drabon et al. 2017
S3	Fig Tree Gp.	SA 568	Northern Domain	-25.833550°	30.911383°	Drabon et al. 2017
S3	Fig Tree Gp.	SAF-206	East-Central Domain	-25.913611°	31.054722°	Drabon et al. 2017
S3	Fig Tree Gp.	SSF-1	Northern Domain	-25.876200°	30.896190°	this study
S5	Bellevue Road Fm./Fig Tree Gp	SA 333	Northern Domain	-25.887418°	30.875587°	Drabon et al. 2017
S5	Bellevue Road Fm./Fig Tree Gp	SA 560	Northern Domain	-25.887418°	30.875587°	Drabon et al. 2017
Saddleback Syncline	Undiff./Moodies Gp.	NAD-130	Northern Domain	-25.842819°	31.075333°	Drabon et al. 2017
Southern Belt	Mapepe Formation	NAD-131	Southern Domain	-25.910467°	30.948232°	Drabon et al. 2017
Southern Belt	Mapepe Formation: Tuffaceous unit	SB-1-10	Southern Domain	-25.91405°	31.01538°	this study
Southern Belt	Mapepe Formation: Tuffaceous unit	SB-1-12	Southern Domain	-25.913497°	31.019739°	this study
Southern Belt	Mapepe Formation	SB-2-21	Southern Domain	-25.91374°	30.96627°	this study
Southern Belt	Mapepe Formation	SB-2-23	Southern Domain	-25.91594°	30.96691°	this study
Stolzburg Syncline	Sheba Formation	NAD-132	Northern Domain	-25.876683°	30.896619°	Drabon et al. 2017
Stolzburg Syncline	Sheba Formation	NAD-133	Northern Domain	-25.885700°	30.871901°	Drabon et al. 2017
The Heights Syncline	Undiff./Moodies Gp.	NAD-128	East-Central Domain	-25.887645°	31.094668°	Drabon et al. 2017
Ulundi Formation	Mapepe Formation	FUI-4	Northern Domain	-25.869390°	30.941810°	this study
Emlembe Syncline	Mapepe Formation	JH11-2B	East-Central Domain	-25.938483°	31.111250°	Harrington 2017, re-reduced
Unnamed Syncline	Undiff./Moodies Gp.	JAH-663-13	East-Central Domain	-25.927769°	31.103856°	Harrington 2017, re-reduced
Unnamed Syncline	Undiff./Moodies Gp.	JAH664-2	East-Central Domain	-25.923283°	31.112933°	Harrington 2017, re-reduced
Unnamed Syncline	Undiff./Moodies Gp.	JH03-1	East-Central Domain	-25.923683°	31.109967°	Harrington 2017, re-reduced
Unnamed Syncline	Undiff./Moodies Gp.	JH05-3	East-Central Domain	-25.928450°	31.102567°	Harrington 2017, re-reduced
Heemstede Syncline	Undiff./Moodies Gp.	NAD-129	West-Central Domain	-25.868654°	31.058586°	Drabon et al. 2017

## Sheet: Data
						Isotope ratios							Apparent ages (Ma)
Sample	Run	Analysis	U	206Pb	U/Th	206Pb*	±	207Pb*	±	206Pb*	±	error	206Pb*	±	207Pb*	±	206Pb*	±	Best age	±	Conc
			(ppm)	204Pb		207Pb*	(%)	235U	(%)	238U	(%)	corr.	238U	(Ma)	235U	(Ma)	207Pb*	(Ma)	(Ma)	(Ma)	(%)
AV-1	part 1	1	135.959	548523	3.84192	3.84908	0.735512	21.8042	1.09799	0.613289	0.815198	0.742448	3083.16	19.9772	3175.05	10.6603	3234.32	11.6015	3234.32	11.6015	95.3263
AV-1	part 1	4	74.7684	273391	3.09244	3.84354	0.844662	21.8184	1.15107	0.612383	0.781914	0.679296	3079.54	19.144	3175.68	11.176	3237.67	13.32	3237.67	13.32	95.1157
AV-1	part 1	6	206.348	160228	1.91425	3.89502	0.679543	20.8198	1.18915	0.592248	0.975688	0.82049	2998.53	23.395	3130.24	11.5216	3216.5	10.7322	3216.5	10.7322	93.2233
AV-1	part 1	10	160.532	373960	2.39281	3.84515	0.828223	21.5186	1.2233	0.604198	0.900227	0.735899	3046.73	21.8571	3162.25	11.8702	3237.08	13.0615	3237.08	13.0615	94.1198
AV-1	part 1	12	154.509	567031	2.08325	3.858	0.737269	21.986	1.20836	0.620412	0.957365	0.792286	3111.56	23.6294	3183.11	11.7362	3229.2	11.6338	3229.2	11.6338	96.357
AV-1	part 1	14	188.62	481840	2.12983	3.87309	0.730409	21.2238	1.14243	0.601256	0.878431	0.768913	3034.9	21.2631	3148.87	11.0785	3223.01	11.5262	3223.01	11.5262	94.1633
AV-1	part 1	17	188.608	768076	3.94086	3.86431	0.80811	21.3322	1.31792	0.602936	1.04109	0.789949	3041.66	25.2443	3153.81	12.7834	3226.65	12.7492	3226.65	12.7492	94.2668
AV-1	part 1	21	206.821	609156	3.54105	3.85875	0.658112	22.6073	1.40474	0.635408	1.24103	0.88346	3170.94	31.0835	3210.19	13.6601	3235.48	10.3794	3235.48	10.3794	98.0052
AV-1	part 1	23	74.5266	251365	3.2675	3.8914	0.926144	21.415	1.27136	0.607016	0.870922	0.685032	3058.04	21.207	3157.57	12.3339	3222.12	14.618	3222.12	14.618	94.9079
AV-1	part 1	24	237.44	609159	3.30866	3.86635	0.953581	22.2077	1.66701	0.625374	1.36732	0.820226	3131.27	33.914	3192.86	16.1985	3232.46	15.0432	3232.46	15.0432	96.8694
AV-1	part 1	25	214.015	544255	3.16871	3.86665	0.829841	21.8552	1.35223	0.615499	1.06764	0.789541	3091.98	26.222	3177.32	13.1303	3232.33	13.0913	3232.33	13.0913	95.6581
AV-1	part 1	26	236.743	84325.8	3.03984	3.82472	0.851292	21.523	1.4888	0.599814	1.22074	0.819948	3029.09	29.5048	3162.45	14.4468	3248.87	13.4264	3248.87	13.4264	93.235
AV-1	part 1	27	144.019	163923	1.79478	3.83659	1.0728	21.9741	1.69227	0.614142	1.30877	0.773377	3086.57	32.1004	3182.58	16.4366	3244.36	16.9076	3244.36	16.9076	95.1363
AV-1	part 1	30	233.625	549294	2.56517	3.85109	0.604524	22.0316	1.24496	0.617967	1.08832	0.874183	3101.82	26.7962	3185.12	12.0928	3238.69	9.53187	3238.69	9.53187	95.774
AV-1	part 1	36	244.522	583157	3.14263	3.86947	0.836567	21.1713	1.13892	0.597262	0.772826	0.678562	3018.8	18.629	3146.47	11.0432	3229.62	13.2003	3229.62	13.2003	93.4722
AV-1	part 1	38	205.064	774875	3.79077	3.8704	0.709619	21.7595	1.06038	0.613991	0.787932	0.743068	3085.96	19.3228	3173.05	10.2942	3229.27	11.1972	3229.27	11.1972	95.5622
AV-1	part 1	39	244.378	157540	2.45466	3.85212	0.659407	20.2746	1.26254	0.56951	1.0765	0.852645	2905.81	25.1808	3104.55	12.2176	3236.4	10.4029	3236.4	10.4029	89.7851
AV-1	part 1	43	202.221	325351	4.9184	3.85892	0.835959	21.8551	1.29913	0.614907	0.994381	0.76542	3089.62	24.4081	3177.31	12.6146	3233.84	13.187	3233.84	13.187	95.5402
AV-1	part 1	47	245.632	683820	3.41507	3.88044	0.704047	21.4918	0.985772	0.606918	0.68997	0.699929	3057.65	16.7991	3161.04	9.56462	3228.02	11.1105	3228.02	11.1105	94.7221
AV-1	part 1	48	247.915	326339	2.59477	3.87492	0.614499	20.9611	0.924589	0.590904	0.690787	0.747129	2993.09	16.54	3136.8	8.96086	3230.77	9.69595	3230.77	9.69595	92.6432
AV-1	part 1	51	179.979	674191	3.47503	3.8759	0.790744	21.9329	1.08395	0.615824	0.741398	0.683975	3093.28	18.2152	3180.76	10.5267	3237.09	12.4695	3237.09	12.4695	95.5575
AV-1	part 1	52	228.036	163064	2.20878	3.8749	0.807783	21.0289	1.22097	0.590406	0.915457	0.749781	2991.07	21.9079	3139.93	11.8352	3237.19	12.7397	3237.19	12.7397	92.397
AV-1	part 1	54	135.911	521348	2.68386	3.8579	1.18895	21.7486	1.64141	0.607686	1.13163	0.689425	3060.73	27.5741	3172.57	15.9352	3244.76	18.7377	3244.76	18.7377	94.3284
AV-1	part 1	55	192.06	735908	2.96254	3.86897	0.756262	22.0147	1.24812	0.616871	0.9929	0.795515	3097.46	24.42	3184.38	12.1231	3240.28	11.9228	3240.28	11.9228	95.5922
AV-1	part 1	57	223.514	316529	3.34091	3.8622	0.764391	22.1271	1.33613	0.618908	1.09587	0.820179	3105.57	27.0074	3189.32	12.9809	3243.12	12.0482	3243.12	12.0482	95.7589
AV-1	part 1	58	227.668	314068	2.28374	3.85159	0.727859	22.0486	1.07603	0.615017	0.792477	0.736481	3090.06	19.4543	3185.87	10.4522	3247.45	11.4685	3247.45	11.4685	95.1534
AV-1	part 1	59	140.161	449076	2.24797	3.86796	0.832161	21.3096	1.1611	0.596981	0.809716	0.697372	3017.66	19.5125	3152.78	11.2616	3240.63	13.1188	3240.63	13.1188	93.1196
AV-1	part 1	61	168.677	464865	2.20874	3.87032	0.758195	22.5131	1.14058	0.631076	0.852079	0.747059	3153.84	21.2524	3206.13	11.0891	3239.68	11.9538	3239.68	11.9538	97.3505
AV-1	part 1	62	249.594	212937	1.86435	3.90714	0.717324	20.0025	1.0788	0.566031	0.805684	0.746831	2891.5	18.7726	3091.48	10.4328	3224.76	11.3195	3224.76	11.3195	89.6657
AV-1	part 1	63	249.192	442476	2.13946	3.88012	0.738627	21.5769	1.16861	0.606298	0.905581	0.77492	3055.16	22.0347	3164.88	11.3408	3235.87	11.6487	3235.87	11.6487	94.4154
AV-1	part 1	68	227.54	259720	1.74416	3.84244	0.697996	20.8937	1.09866	0.582791	0.848429	0.772241	2960.13	20.1384	3133.67	10.6464	3247.48	10.9977	3247.48	10.9977	91.1514
AV-1	part 1	69	218.169	464703	2.1803	3.854	0.817697	22.2849	1.17863	0.623422	0.848847	0.720196	3123.52	21.0136	3196.23	11.4542	3242.86	12.8884	3242.86	12.8884	96.3199
AV-1	part 1	70	243.19	820553	2.6668	3.86481	0.819716	21.7189	1.35358	0.60927	1.07714	0.795772	3067.08	26.2889	3171.24	13.1398	3238.5	12.9248	3238.5	12.9248	94.7066
AV-1	part 1	72	169.488	599258	1.93434	3.86588	0.799413	21.7436	1.28201	0.610142	1.00223	0.781763	3070.57	24.4824	3172.34	12.4456	3238.04	12.6054	3238.04	12.6054	94.828
AV-1	part 1	73	198.654	344820	1.71775	3.88339	0.72402	21.8403	1.26856	0.616275	1.04163	0.821116	3095.08	25.6032	3176.65	12.3174	3229.26	11.4248	3229.26	11.4248	95.8447
AV-1	part 1	74	214.948	931450	2.66317	3.86389	0.748137	22.061	1.38604	0.61933	1.16678	0.841813	3107.25	28.7673	3186.42	13.4641	3237.33	11.7973	3237.33	11.7973	95.982
AV-1	part 1	76	208.065	335022	2.38112	3.86743	0.947127	21.9438	1.75742	0.616651	1.48036	0.842349	3096.58	36.4009	3181.24	17.0684	3235.76	14.9372	3235.76	14.9372	95.6987
AV-1	part 1	77	132.516	541156	1.16365	3.86787	0.63979	22.7295	1.27101	0.638774	1.09823	0.864063	3184.2	27.5959	3215.43	12.3624	3235.65	10.0903	3235.65	10.0903	98.4097
AV-1	part 1	78	231.544	256519	1.19718	3.85033	0.850717	20.2809	1.67071	0.567538	1.43787	0.860639	2897.7	33.5599	3104.85	16.1683	3242.37	13.4099	3242.37	13.4099	89.37
AV-1	part 1	79	247.844	182620	1.6387	3.89445	0.694081	20.0162	1.14747	0.566476	0.913665	0.796245	2893.33	21.2992	3092.14	11.0972	3224.6	10.9529	3224.6	10.9529	89.7269
AV-1	part 1	80	182.23	724465	2.10863	3.86404	0.628362	22.5028	1.00985	0.631765	0.790531	0.782822	3156.57	19.7304	3205.69	9.81784	3237.24	9.90872	3237.24	9.90872	97.5078
AV-1	part 1	81	228.214	302659	1.76975	3.76451	0.623536	23.7616	1.04658	0.64997	0.840511	0.803104	3228.09	21.3442	3258.66	10.198	3278.2	9.79692	3278.2	9.79692	98.4713
AV-1	part 1	82	175.5	561096	1.8368	3.86013	0.828584	22.2482	1.21768	0.623994	0.892293	0.732778	3125.79	22.1016	3194.63	11.8329	3238.82	13.0644	3238.82	13.0644	96.5103
AV-1	part 1	84	243.326	915482	1.21778	3.87586	0.806116	22.3202	1.24548	0.628002	0.949409	0.762286	3141.68	23.6091	3197.77	12.1046	3233.82	12.7153	3233.82	12.7153	97.1509
AV-1	part 1	85	165.095	408464	1.28193	3.86108	0.694469	22.6218	1.17579	0.634096	0.948759	0.80691	3165.77	23.733	3210.82	11.4339	3239.76	10.9494	3239.76	10.9494	97.7163
AV-1	part 1	89	219.312	560094	2.57423	3.86785	0.599053	22.9304	2.12427	0.643983	2.03805	0.959411	3204.65	51.4658	3223.99	20.671	3236.72	9.44704	3236.72	9.44704	99.0093
AV-1	part 1	90	137.033	224520	2.4952	3.85991	0.78977	22.4326	1.16118	0.630248	0.851141	0.732999	3150.57	21.2119	3202.65	11.2877	3236.11	12.4565	3236.11	12.4565	97.3568
AV-1	part 1	91	126.416	107494	3.3136	3.84716	0.759968	21.4981	1.12666	0.603443	0.831725	0.738224	3043.69	20.1782	3161.32	10.9318	3237.54	11.984	3237.54	11.984	94.0125
AV-1	part 1	93	238.033	430144	2.66144	3.87674	0.731466	21.96	1.06032	0.62376	0.767599	0.723934	3124.86	19.0086	3181.96	10.2977	3218.83	11.5466	3218.83	11.5466	97.0806
AV-1	part 1	95	184.867	616750	2.86934	3.87236	0.680748	21.6194	0.986435	0.613375	0.713876	0.723693	3083.5	17.4958	3166.79	9.57357	3220.67	10.7442	3220.67	10.7442	95.7411
AV-1	part 1	96	222.582	669002	3.38666	3.87022	0.777944	21.5067	1.17001	0.609836	0.873908	0.746925	3069.35	21.3411	3161.71	11.3527	3221.55	12.2779	3221.55	12.2779	95.2756
AV-1	part 1	98	222.47	241014	2.01163	3.855	0.733595	22.1121	1.26696	0.624605	1.03292	0.815276	3128.22	25.6004	3188.67	12.3085	3227.6	11.5782	3227.6	11.5782	96.9209
AV-1	part 1	99	162.987	669468	2.3011	3.86356	0.882223	22.3092	1.32112	0.631503	0.983365	0.744344	3155.53	24.5371	3197.29	12.8396	3224.27	13.9216	3224.27	13.9216	97.8681
AV-1	part 2	2	206.584	122916	0.898656	3.86361	0.672417	21.7841	0.898857	0.614992	0.596316	0.663415	3089.96	14.6384	3174.15	8.72648	3228.48	10.6133	3228.48	10.6133	95.7093
AV-1	part 2	3	199.835	95666.6	2.48031	3.87252	0.768949	22.3105	1.17978	0.630853	0.894533	0.758221	3152.96	22.3064	3197.34	11.4659	3225.98	12.1359	3225.98	12.1359	97.7365
AV-1	part 2	4	284.568	28436.7	1.69774	3.90096	0.675959	20.8454	1.1784	0.594378	0.964701	0.818652	3007.15	23.1838	3131.43	11.418	3212.78	10.687	3212.78	10.687	93.5997
AV-1	part 2	5	231.888	96156.9	2.64488	3.86135	0.72061	22.2073	1.011	0.62612	0.708923	0.701207	3134.23	17.5964	3192.84	9.82352	3230.55	11.3725	3230.55	11.3725	97.0184
AV-1	part 2	6	172.279	85959.3	2.14071	3.87944	1.11539	22.3874	1.5801	0.634189	1.11831	0.707748	3166.14	27.977	3200.69	15.3593	3223.09	17.6178	3223.09	17.6178	98.2329
AV-1	part 2	8	206.653	65200	2.24104	3.8626	0.799508	21.856	1.24291	0.616717	0.951341	0.765415	3096.84	23.3942	3177.35	12.0687	3229.27	12.6212	3229.27	12.6212	95.8992
AV-1	part 2	9	284.933	14200	1.98018	3.88171	0.70217	22.0874	1.33096	0.62776	1.09601	0.823478	3140.72	27.2483	3187.58	12.9297	3217.88	11.9207	3217.88	11.9207	97.6023
AV-1	part 2	11	302.935	125545	2.51797	3.87183	0.699289	22.4884	1.18955	0.634909	0.962105	0.808796	3168.97	24.0858	3205.06	11.5648	3228.4	11.0393	3228.4	11.0393	98.1592
AV-1	part 2	12	256.201	111000	3.02258	3.8723	0.683261	21.9265	1.15032	0.61886	0.925115	0.804225	3105.38	22.7981	3180.48	11.1711	3228.87	10.788	3228.87	10.788	96.1754
AV-1	part 2	13	295.045	169149	1.70838	3.86829	0.64645	21.6154	0.944457	0.609369	0.68838	0.728863	3067.48	16.8024	3166.6	9.16606	3230.71	10.2021	3230.71	10.2021	94.9474
AV-1	part 2	14	111.347	53513.3	3.08198	3.85974	0.7087	22.2013	0.958434	0.624831	0.643475	0.671382	3129.12	15.9516	3192.58	9.31258	3233.38	11.2043	3233.38	11.2043	96.7755
AV-1	part 2	15	311.885	105532	5.26202	3.86692	0.724453	22.2837	1.15198	0.628079	0.895496	0.777352	3141.99	22.2701	3196.17	11.1951	3231.04	11.4331	3231.04	11.4331	97.2439
AV-1	part 2	16	260.251	65470.4	1.4881	3.85743	0.962222	21.9001	1.44811	0.615901	1.08051	0.746148	3093.59	26.5488	3179.31	14.0627	3234.54	15.2068	3234.54	15.2068	95.6423
AV-1	part 2	17	168.657	93298.7	4.33558	3.86952	0.718397	22.4342	1.02606	0.632779	0.731423	0.712847	3160.57	18.2731	3202.72	9.97417	3229.9	11.3541	3229.9	11.3541	97.8536
AV-1	part 2	18	224.247	84995	2.4095	3.86972	0.756466	21.8282	1.25879	0.615746	1.00595	0.799144	3092.97	24.7131	3176.12	12.2222	3229.75	11.9398	3229.75	11.9398	95.7651
AV-1	part 2	19	302.633	12059.2	1.49549	3.88127	0.721676	20.5218	1.37468	0.583954	1.1379	0.827758	2964.86	27.0434	3116.28	13.3105	3216	12.1782	3216	12.1782	92.1909
AV-1	part 2	20	252.118	27644.2	2.49991	3.85437	0.893987	21.9227	1.30158	0.618253	0.943563	0.724939	3102.97	23.2387	3180.31	12.6401	3230.15	14.1458	3230.15	14.1458	96.0627
AV-1	part 2	21	140.332	64635.9	1.87493	3.87408	0.824662	22.3384	1.20395	0.632661	0.876058	0.727653	3160.11	21.8841	3198.56	11.7014	3223.44	13.0322	3223.44	13.0322	98.0353
AV-1	part 2	23	246.334	117094	2.29313	3.86834	0.794404	22.1378	1.19262	0.625873	0.888957	0.745382	3133.25	22.0597	3189.79	11.5868	3226.23	12.5434	3226.23	12.5434	97.118
AV-1	part 2	24	255.199	109578	2.66034	3.85929	0.707543	21.7446	1.21601	0.613334	0.988476	0.812885	3083.34	24.2247	3172.39	11.8048	3229.88	11.1748	3229.88	11.1748	95.4628
AV-1	part 2	25	285.681	12534.4	1.10499	3.8418	0.673708	22.0321	1.04205	0.620417	0.750375	0.720093	3111.58	18.5206	3185.14	10.1218	3232.49	11.4063	3232.49	11.4063	96.2594
AV-1	part 2	28	180.035	50231.6	2.77515	3.87913	0.793861	22.5574	1.34006	0.640868	1.07852	0.804829	3192.43	27.1546	3208.04	13.0299	3218.5	12.5553	3218.5	12.5553	99.1901
AV-1	part 2	29	307.446	9993.55	1.95047	3.82776	0.774092	21.4519	1.32951	0.603368	1.06574	0.8016	3043.39	25.8536	3159.24	12.8991	3234.34	12.5372	3234.34	12.5372	94.0962
AV-1	part 2	30	243.842	57794.4	5.25899	3.86923	0.688134	23.0629	1.22818	0.653482	1.01655	0.827688	3241.79	25.8991	3229.6	11.9531	3222.71	10.8764	3222.71	10.8764	100.592
AV-1	part 2	31	258.509	19354.8	2.27701	3.88723	0.905326	21.4495	1.39767	0.61148	1.0431	0.746316	3075.93	25.5155	3159.13	13.5603	3213.1	14.6925	3213.1	14.6925	95.7308
AV-1	part 2	32	243.022	123799	2.7715	3.8628	0.659565	21.7198	1.03452	0.614175	0.796349	0.769773	3086.7	19.5328	3171.28	10.0424	3225.92	10.4227	3225.92	10.4227	95.6843
AV-1	part 2	33	287.825	136157	2.33162	3.86648	0.661963	22.0706	1.0077	0.623438	0.759526	0.753721	3123.59	18.8027	3186.84	9.78883	3227.58	10.4513	3227.58	10.4513	96.778
AV-1	part 2	35	283.255	13462.5	2.60546	3.85077	0.745102	21.7605	1.03661	0.61387	0.710406	0.685318	3085.48	17.4194	3173.1	10.0634	3229.66	11.9114	3229.66	11.9114	95.5357
AV-1	part 2	36	229.126	80101.6	3.15013	3.86782	0.787599	22.2786	1.12352	0.629664	0.801055	0.712988	3148.26	19.9523	3195.96	10.9184	3226.7	12.4332	3226.7	12.4332	97.569
AV-1	part 2	37	237.737	25743.2	2.99991	3.84668	0.643782	22.1396	0.933111	0.622986	0.665813	0.713541	3121.79	16.4754	3189.87	9.06544	3233.65	10.3119	3233.65	10.3119	96.5407
AV-1	part 2	38	282.332	91225.5	2.40223	3.87214	0.75891	22.4223	1.23048	0.634393	0.968406	0.787016	3166.94	24.2314	3202.2	11.9612	3225.04	11.9775	3225.04	11.9775	98.1984
AV-1	part 2	39	191.953	9323.08	3.13865	3.84299	0.725698	22.6567	1.16108	0.638886	0.88475	0.762005	3184.64	22.2339	3212.31	11.2915	3230.32	11.8631	3230.32	11.8631	98.586
AV-1	part 2	41	202.96	97135.7	3.00429	3.87331	0.633019	21.9861	0.959635	0.622413	0.720924	0.751249	3119.51	17.829	3183.12	9.32033	3224.13	9.99344	3224.13	9.99344	96.7553
AV-1	part 2	42	256.827	61004.2	2.58833	3.85981	0.68528	22.4757	1.07707	0.634213	0.830188	0.770781	3166.23	20.7693	3204.52	10.4709	3229.25	10.8278	3229.25	10.8278	98.0485
AV-1	part 2	43	221.06	14461	2.99688	3.85616	0.771299	21.9343	1.16483	0.619696	0.83538	0.717168	3108.71	20.6039	3180.82	11.3123	3227.31	12.8112	3227.31	12.8112	96.3251
AV-1	part 2	44	245.092	9078.67	2.88308	3.81819	0.686067	23.1626	1.5134	0.648211	1.31441	0.868514	3221.21	33.3239	3233.8	14.7318	3242.29	11.824	3242.29	11.824	99.35
AV-1	part 2	46	230.731	18582.9	3.66731	3.83985	0.738562	22.7095	1.10671	0.63846	0.812401	0.734067	3182.96	20.4074	3214.58	10.7638	3235.04	11.8532	3235.04	11.8532	98.3901
AV-1	part 2	48	271.91	15805.2	2.67877	3.84187	0.654158	22.7644	1.38074	0.641532	1.1893	0.861348	3195.04	29.9627	3216.92	13.4306	3231.27	11.0663	3231.27	11.0663	98.8786
AV-1	part 2	51	280.255	21411.2	3.16167	3.85963	0.618623	22.8468	0.979678	0.644523	0.755476	0.771148	3206.77	19.0871	3220.44	9.53062	3229.64	9.84143	3229.64	9.84143	99.2919
AV-1	part 2	52	212.655	59800.4	4.15738	3.86995	1.06354	22.6218	1.54237	0.639103	1.11622	0.723708	3185.49	28.0567	3210.81	14.999	3227.35	16.7931	3227.35	16.7931	98.703
AV-1	part 2	53	245.465	93641.4	3.15602	3.86195	0.673002	22.5641	1.17305	0.636794	0.960483	0.818791	3176.4	24.0888	3208.33	11.406	3229.03	10.6265	3229.03	10.6265	98.3701
AV-1	part 2	54	224.363	89869.9	3.29539	3.8645	0.862713	22.3808	1.2476	0.63205	0.900834	0.722052	3157.69	22.4897	3200.4	12.1267	3227.96	13.6212	3227.96	13.6212	97.8233
AV-1	part 2	55	244.107	21893	2.56443	3.86863	0.786814	21.4613	1.23525	0.607602	0.951906	0.770616	3060.4	23.1929	3159.66	11.9847	3224	12.4221	3224	12.4221	94.9254
AV-1	part 2	57	304.197	9864.48	2.71297	3.8544	0.934079	22.2664	1.39941	0.630533	1.0411	0.74396	3151.7	25.9533	3195.42	13.5994	3223.66	14.757	3223.66	14.757	97.7677
AV-1	part 2	58	289.354	48791.8	3.79348	3.88191	0.979938	23.1688	1.45263	0.658583	1.07119	0.737415	3261.65	27.4196	3234.06	14.1404	3217.67	15.491	3217.67	15.491	101.367
AV-1	part 2	59	233.773	31774.1	3.0289	3.88528	0.600914	22.1474	1.02631	0.632298	0.828402	0.807169	3158.67	20.6863	3190.21	9.97105	3210.79	9.56835	3210.79	9.56835	98.3767
AV-1	part 2	60	174.318	50249	3.06302	3.86614	0.739503	22.9187	1.07624	0.650777	0.781193	0.725853	3231.24	19.8528	3223.5	10.4715	3219.36	11.6853	3219.36	11.6853	100.369
AV-1	part 2	61	258.833	8479.81	2.99428	3.82575	0.758939	22.7454	1.15641	0.64164	0.744664	0.643943	3195.46	18.7626	3216.11	11.248	3229.69	13.9601	3229.69	13.9601	98.94
AV-1	part 2	62	225.889	112206	2.31351	3.88404	0.765106	22.6176	1.14824	0.646162	0.856153	0.745619	3213.19	21.6641	3210.63	11.1659	3209.72	12.0868	3209.72	12.0868	100.108
AV-1	part 2	63	169.727	36795.5	2.71521	3.85534	0.798768	22.6307	1.21946	0.642235	0.921025	0.755272	3197.79	23.2194	3211.2	11.8588	3220.25	12.6154	3220.25	12.6154	99.3027
AV-1	part 2	64	205.34	95368.3	3.72584	3.86063	1.26292	22.7289	1.79057	0.643263	1.26864	0.708512	3201.83	32.0141	3215.41	17.4166	3224.56	19.9413	3224.56	19.9413	99.295
AV-1	part 2	65	237.613	90208.9	2.93194	3.89246	0.823934	22.2171	1.34503	0.633982	1.06282	0.790184	3165.32	26.5834	3193.27	13.0697	3211.56	13.0201	3211.56	13.0201	98.5602
AV-1	part 2	66	276.516	102382	3.42881	3.86548	0.811072	23.1897	1.30243	0.657106	1.01834	0.781875	3255.91	26.0314	3234.94	12.6786	3222.63	12.8142	3222.63	12.8142	101.032
AV-1	part 2	67	166.607	47716	2.49824	3.86714	0.873792	23.541	1.30482	0.667648	0.96684	0.740977	3296.79	24.9527	3249.58	12.7097	3221.25	13.8299	3221.25	13.8299	102.345
AV-1	part 2	68	211.292	29896.4	3.58489	3.86089	0.714904	22.692	1.10677	0.642544	0.834971	0.754421	3199.01	21.0561	3213.83	10.764	3223.76	11.4633	3223.76	11.4633	99.2323
AV-1	part 2	69	246.387	61039.2	2.92476	3.8763	0.729485	22.7715	1.22456	0.64692	0.981874	0.801818	3216.16	24.863	3217.23	11.9114	3218.56	11.5512	3218.56	11.5512	99.9253
AV-1	part 2	70	240.87	126364	3.21682	3.8726	0.692816	22.713	1.37539	0.64442	1.188	0.863757	3206.37	30.012	3214.73	13.3773	3220.62	10.9386	3220.62	10.9386	99.5574
AV-1	part 2	71	204.581	59994.6	2.74241	3.86095	0.666588	22.3841	1.05503	0.633406	0.816928	0.774319	3163.04	20.4217	3200.55	10.2548	3224.81	10.5383	3224.81	10.5383	98.0847
AV-1	part 2	72	226.359	19846.8	2.13578	3.8582	0.806279	22.4315	1.12161	0.635168	0.779142	0.694664	3169.99	19.5102	3202.6	10.903	3223.76	12.7315	3223.76	12.7315	98.3322
AV-1	part 2	74	131.257	34457.5	4.80518	3.85813	0.92425	22.421	1.53116	0.633216	1.21691	0.794766	3162.29	30.4151	3202.14	14.8844	3227.88	14.6602	3227.88	14.6602	97.9683
AV-1	part 2	76	297.802	45335.5	2.96588	3.86973	0.786392	22.4182	1.19733	0.634864	0.901117	0.752607	3168.8	22.558	3202.03	11.6388	3223.58	12.4411	3223.58	12.4411	98.3004
AV-1	part 2	78	243.7	53167.2	2.75333	3.87296	0.7412	22.2316	1.20255	0.62954	0.945684	0.786398	3147.77	23.5518	3193.9	11.6854	3223.68	11.7217	3223.68	11.7217	97.6453
AV-1	part 2	79	218.152	98715.1	3.24903	3.87691	0.798521	22.7805	1.15156	0.643298	0.829642	0.720449	3201.97	20.9366	3217.61	11.2015	3228.06	12.6029	3228.06	12.6029	99.1919
AV-1	part 2	80	253.907	67086	3.11296	3.85311	0.701718	22.2499	1.05663	0.624579	0.789249	0.74695	3128.12	19.5605	3194.7	10.2677	3237.46	11.078	3237.46	11.078	96.6225
AV-1	part 2	81	265.866	121957	3.33362	3.86127	0.772417	22.367	1.0728	0.629023	0.743993	0.693504	3145.72	18.5194	3199.8	10.4272	3234.55	12.1905	3234.55	12.1905	97.2537
AV-1	part 2	82	206.117	49178.4	2.54219	3.85694	0.776964	22.6517	1.12009	0.636629	0.803009	0.716912	3175.75	20.1361	3212.1	10.8928	3235.55	12.3155	3235.55	12.3155	98.1519
AV-1	part 2	83	252.43	125735	3.16052	3.86528	0.854718	22.7234	1.3271	0.639705	1.01491	0.76476	3187.86	25.5248	3215.17	12.9078	3232.93	13.4883	3232.93	13.4883	98.6056
AV-1	part 2	84	236.936	26535.8	2.98801	3.84505	0.688716	22.6676	0.951033	0.635558	0.645632	0.678875	3171.53	16.1731	3212.78	9.24887	3239.31	11.0096	3239.31	11.0096	97.9078
AV-1	part 2	85	321.297	164485	3.12751	3.87101	0.681365	22.5479	1.02652	0.635657	0.767623	0.747791	3171.92	19.2308	3207.63	9.98081	3230.72	10.7529	3230.72	10.7529	98.1802
AV-1	part 2	87	265.034	139797	1.82374	3.85964	0.670708	22.4807	0.97461	0.631928	0.707054	0.725473	3157.21	17.6497	3204.73	9.47485	3235.29	10.5791	3235.29	10.5791	97.5866
AV-1	part 2	89	329.113	62562.9	6.16632	3.88443	0.693028	21.5715	1.07712	0.613095	0.823338	0.764388	3082.38	20.1728	3164.63	10.4527	3217.88	10.9631	3217.88	10.9631	95.7892
AV-1	part 2	91	118.623	57500.5	6.07217	3.85883	0.73271	22.3718	1.1316	0.630716	0.860397	0.760337	3152.42	21.4523	3200.01	10.9989	3230.66	11.5965	3230.66	11.5965	97.5782
AV-1	part 2	92	215.439	17533.4	2.1824	3.84932	0.735417	22.038	1.16985	0.620849	0.900069	0.769391	3113.3	22.2249	3185.41	11.3633	3231.82	11.7889	3231.82	11.7889	96.3326
AV-1	part 2	93	154.755	27045.9	2.15106	3.86505	0.944955	22.4138	1.42554	0.631868	1.06422	0.746535	3156.97	26.564	3201.83	13.8574	3230.74	14.9646	3230.74	14.9646	97.7169
AV-1	part 2	95	202.181	58908.3	2.78293	3.88344	0.890006	23.1157	1.3122	0.654218	0.963229	0.734059	3244.66	24.5573	3231.83	12.772	3224.54	14.0611	3224.54	14.0611	100.624
AV-1	part 2	96	220.125	103191	4.00713	3.86602	0.70562	22.8444	1.12877	0.643446	0.880564	0.780109	3202.55	22.2248	3220.34	10.9811	3232.11	11.1408	3232.11	11.1408	99.0853
AV-1	part 2	98	188.582	69325.1	2.31595	3.86398	0.839091	22.5947	1.21979	0.636201	0.884666	0.725259	3174.07	22.1747	3209.65	11.8612	3232.63	13.2478	3232.63	13.2478	98.1883
AV-1	part 2	100	238.574	140376	2.66112	3.87912	0.769636	22.803	1.16651	0.645026	0.876497	0.751385	3208.74	22.1552	3218.57	11.3474	3225.38	12.1448	3225.38	12.1448	99.4842
AV-2	part 1	2	247.175	20738.5	1.06909	3.857	0.619113	20.906	1.37067	0.58695	1.21727	0.888085	2977.04	29.0232	3134.24	13.2829	3237.2	9.93546	3237.2	9.93546	91.9635
AV-2	part 1	3	194.654	42944.3	1.8206	3.8696	0.724213	22.6176	1.10444	0.634935	0.833546	0.754722	3169.07	20.8679	3210.64	10.7399	3237.38	11.4254	3237.38	11.4254	97.8901
AV-2	part 1	4	229.852	24330.5	1.62594	3.85634	0.623087	21.5589	0.961438	0.60359	0.721976	0.750933	3044.29	17.5183	3164.07	9.3298	3241.62	10.0083	3241.62	10.0083	93.9126
AV-2	part 1	8	227.72	18912.1	1.67714	3.85186	0.727963	22.8652	1.4035	0.638842	1.18841	0.846742	3184.46	29.8637	3221.22	13.6546	3244.87	11.7669	3244.87	11.7669	98.1384
AV-2	part 1	9	145.071	26238.5	1.50523	3.89465	0.758961	21.9626	1.14773	0.620091	0.859148	0.748563	3110.28	21.1984	3182.08	11.1468	3228.34	12.0092	3228.34	12.0092	96.3431
AV-2	part 1	13	212.372	33998.4	1.27369	3.86722	0.688144	22.9151	1.00371	0.642649	0.727974	0.725282	3199.42	18.3597	3223.34	9.76566	3238.94	10.8949	3238.94	10.8949	98.78
AV-2	part 1	14	145.891	26709.5	1.39708	3.85543	0.747865	23.4395	1.05414	0.655557	0.740754	0.702709	3249.88	18.9086	3245.37	10.266	3243.26	11.8209	3243.26	11.8209	100.204
AV-2	part 1	15	197.431	20250.7	1.15203	3.91528	0.709613	21.5493	1.07795	0.612391	0.807501	0.749106	3079.57	19.7706	3163.63	10.4603	3218.07	11.2726	3218.07	11.2726	95.6962
AV-2	part 1	17	170.733	30547	1.25293	3.86967	1.16121	21.4985	1.66716	0.603398	1.19269	0.715401	3043.51	28.9342	3161.34	16.1771	3237.69	18.3686	3237.69	18.3686	94.0026
AV-2	part 1	18	148.554	31743.1	1.47587	3.87393	0.701099	22.5162	0.998738	0.632617	0.704678	0.705568	3159.93	17.6022	3206.26	9.71008	3236.06	11.1615	3236.06	11.1615	97.6476
AV-2	part 1	19	147.101	27834.6	1.53565	3.87058	0.721846	22.5986	1.05261	0.633709	0.757626	0.719758	3164.24	18.9448	3209.82	10.2355	3239.1	11.5214	3239.1	11.5214	97.6889
AV-2	part 1	21	221.298	18368.3	1.03387	3.92353	0.657994	20.4902	1.22824	0.582939	1.03342	0.841382	2960.73	24.5334	3114.79	11.8916	3216.32	10.4797	3216.32	10.4797	92.0534
AV-2	part 1	22	213.901	45105.9	2.28525	3.86617	0.715232	22.8983	1.03543	0.641015	0.745661	0.720149	3193	18.7766	3222.63	10.0739	3241.79	11.3242	3241.79	11.3242	98.495
AV-2	part 1	23	227.734	16430.3	1.06503	3.86924	0.781907	20.9727	1.17257	0.58854	0.847051	0.722385	2983.5	20.2305	3137.33	11.3647	3237.96	12.7851	3237.96	12.7851	92.1413
AV-2	part 1	25	160.42	34770.7	1.56078	3.86919	0.776726	22.4636	1.0451	0.629512	0.693769	0.663831	3147.66	17.2775	3203.99	10.1598	3240.13	12.3223	3240.13	12.3223	97.1462
AV-2	part 1	27	193.166	30195	1.21417	3.86723	0.677607	22.3793	1.0183	0.626944	0.755997	0.742415	3137.49	18.78	3200.34	9.89766	3240.64	10.7545	3240.64	10.7545	96.817
AV-2	part 1	28	164.021	26065.4	1.58049	3.86846	0.788053	22.6919	1.20926	0.637209	0.908386	0.751189	3178.04	22.7913	3213.82	11.7609	3236.91	12.5874	3236.91	12.5874	98.1812
AV-2	part 1	32	148.427	25809.6	0.669541	3.85995	0.787044	22.5686	1.06214	0.632363	0.703753	0.662579	3158.93	17.5748	3208.52	10.3276	3240.35	12.5416	3240.35	12.5416	97.4872
AV-2	part 1	33	155.915	31133.7	1.27866	3.8666	0.790454	22.1326	1.05088	0.621761	0.687653	0.654361	3116.92	16.9951	3189.56	10.2095	3236.25	12.5319	3236.25	12.5319	96.3127
AV-2	part 1	34	126.603	27135.9	1.46008	3.86904	0.743747	23.2694	1.02925	0.653479	0.710619	0.690426	3241.78	18.1046	3238.28	10.0205	3236.78	11.7413	3236.78	11.7413	100.154
AV-2	part 1	35	176.926	23427	1.04672	3.87817	0.689058	21.335	1.36663	0.600737	1.1772	0.861389	3032.81	28.4797	3153.94	13.256	3232.62	10.9505	3232.62	10.9505	93.8188
AV-2	part 1	38	149.467	22631.1	1.67805	3.86835	0.688291	21.7093	0.958342	0.610455	0.662236	0.691022	3071.82	16.1822	3170.81	9.30261	3234.74	10.9257	3234.74	10.9257	94.9636
AV-2	part 1	39	168.051	21971.4	1.28475	3.87713	0.709434	21.117	1.02095	0.593807	0.72716	0.712241	3004.84	17.4646	3143.98	9.89812	3234.72	11.3029	3234.72	11.3029	92.8934
AV-2	part 1	40	159.304	34659.1	1.26567	3.86594	0.696935	23.4698	1.15032	0.657583	0.911887	0.792724	3257.76	23.3204	3246.63	11.2033	3240.43	11.0545	3240.43	11.0545	100.535
AV-2	part 1	41	225.717	40874.4	2.10846	3.3458	0.754944	28.0487	1.17137	0.679894	0.894944	0.764018	3343.95	23.3494	3420.8	11.4849	3466.78	11.7065	3466.78	11.7065	96.457
AV-2	part 1	44	164.447	30822	1.25583	3.87613	0.743364	21.924	1.06714	0.615519	0.763873	0.715813	3092.06	18.7616	3180.37	10.3632	3237.23	11.7506	3237.23	11.7506	95.5157
AV-2	part 1	45	200.283	21266	1.27093	3.91141	0.742552	20.9786	1.39091	0.595947	1.17394	0.844006	3013.49	28.2589	3137.61	13.4813	3218.67	11.7759	3218.67	11.7759	93.6253
AV-2	part 1	46	199.112	23626.1	1.25413	3.89127	0.812528	21.2779	1.23258	0.601206	0.923526	0.749262	3034.69	22.3535	3151.34	11.9542	3227.16	12.8829	3227.16	12.8829	94.036
AV-2	part 1	47	115.202	20176.3	1.7257	3.86968	0.868145	22.3972	1.2884	0.629489	0.948166	0.735924	3147.57	23.6125	3201.11	12.5237	3235.52	13.7578	3235.52	13.7578	97.2818
AV-2	part 1	49	191.301	7479.43	1.13425	3.88321	1.00786	18.9845	1.62118	0.536924	1.24856	0.770158	2770.56	28.1185	3041.03	15.6387	3225.64	16.3167	3225.64	16.3167	85.8917
AV-2	part 1	50	174.263	11952.6	1.17005	3.89963	0.795306	19.1566	1.86947	0.542922	1.67367	0.895267	2795.67	37.9654	3049.73	18.0424	3222.35	13.1448	3222.35	13.1448	86.7588
AV-2	part 1	51	249.434	35473.7	1.27016	3.86805	0.729201	21.5826	1.18729	0.602529	0.936459	0.788735	3040.02	22.6977	3165.13	11.5222	3246.12	11.5009	3246.12	11.5009	93.651
AV-2	part 1	52	180.662	32087.4	1.22559	3.86642	0.702958	21.3353	1.29584	0.595449	1.08691	0.838767	3011.47	26.1501	3153.95	12.5692	3246.58	11.1176	3246.58	11.1176	92.7582
AV-2	part 1	55	220.123	45709.9	0.567626	3.87242	0.810433	25.0403	1.11477	0.701873	0.765123	0.686349	3427.75	20.3415	3309.79	10.8849	3239.79	12.7819	3239.79	12.7819	105.802
AV-2	part 1	56	212.403	20444.1	1.25402	3.86772	0.602097	21.706	1.37067	0.609504	1.22601	0.894461	3068.02	29.9296	3170.66	13.3054	3236.96	9.66481	3236.96	9.66481	94.7807
AV-2	part 1	57	184.092	26505.9	1.28849	3.91292	0.716366	21.7414	0.961316	0.617357	0.636368	0.661976	3099.39	15.6588	3172.25	9.33209	3219.33	11.3733	3219.33	11.3733	96.2745
AV-2	part 1	58	182.825	31960.1	1.18142	3.87501	0.661161	22.4813	0.913836	0.631787	0.62908	0.688395	3156.65	15.7012	3204.76	8.884	3235.68	10.4535	3235.68	10.4535	97.5575
AV-2	part 1	59	185.09	13845.1	1.09029	3.84655	0.820767	21.6641	1.59886	0.60537	1.36208	0.851904	3051.44	33.1108	3168.79	15.5195	3244.64	13.1958	3244.64	13.1958	94.0455
AV-2	part 1	60	249.991	42085.5	3.18803	3.89771	0.721675	21.558	1.03981	0.609208	0.746983	0.718383	3066.83	18.2299	3164.02	10.0904	3226.93	11.416	3226.93	11.416	95.0386
AV-2	part 1	61	237.337	22531.8	0.921454	3.85771	0.613028	21.2101	0.914018	0.594971	0.672181	0.735414	3009.54	16.164	3148.24	8.86314	3238.57	9.76546	3238.57	9.76546	92.928
AV-2	part 1	62	128.873	26269.5	1.03972	3.86087	0.889905	22.278	1.22321	0.625263	0.833844	0.681687	3130.83	20.6797	3195.93	11.8872	3237.72	14.112	3237.72	14.112	96.6984
AV-2	part 1	63	215.82	26397.8	0.95063	3.8844	0.72937	21.9889	1.07854	0.61996	0.787763	0.730397	3109.76	19.4346	3183.24	10.4753	3230.55	11.6228	3230.55	11.6228	96.2609
AV-2	part 1	64	166.73	10420.1	1.61372	3.84618	0.806413	20.4401	1.10887	0.572013	0.751299	0.677538	2916.08	17.6231	3112.41	10.7345	3242.31	12.8552	3242.31	12.8552	89.9383
AV-2	part 1	69	184.578	18518	0.884503	3.89229	0.755371	20.6247	1.80852	0.582361	1.63299	0.902945	2958.38	38.7431	3121.12	17.5159	3228.22	12.265	3228.22	12.265	91.6412
AV-2	part 1	72	229.308	49599.4	0.900593	3.86716	0.682244	23.1368	0.95612	0.648129	0.667539	0.698175	3220.89	16.9226	3232.71	9.30632	3240.73	10.7909	3240.73	10.7909	99.3878
AV-2	part 1	75	221.859	25745.4	1.68024	3.86391	0.689876	21.9825	0.900763	0.617431	0.56932	0.632043	3099.69	14.01	3182.95	8.74844	3236.54	11.0078	3236.54	11.0078	95.7716
AV-2	part 1	76	223.558	7892.06	0.989458	3.8685	0.784111	19.5514	1.58401	0.551875	1.36845	0.863919	2832.96	31.3715	3069.43	15.3023	3228.73	12.5885	3228.73	12.5885	87.7424
AV-2	part 1	77	163.039	32571.4	1.17561	3.87873	0.766535	22.2236	1.05575	0.626389	0.725081	0.686792	3135.29	18.0022	3193.55	10.2587	3231.03	12.1069	3231.03	12.1069	97.0368
AV-2	part 1	78	154.109	31312.3	1.55292	3.86669	0.856265	22.8388	1.17503	0.641754	0.800369	0.681148	3195.91	20.1683	3220.1	11.431	3235.88	13.5675	3235.88	13.5675	98.7648
AV-2	part 1	79	127.445	22939.9	1.3414	3.859	0.705732	22.4361	1.04589	0.629486	0.752959	0.719921	3147.56	18.7511	3202.8	10.167	3238.26	11.4458	3238.26	11.4458	97.199
AV-2	part 1	80	227.493	23128.5	1.77185	3.86298	0.78597	21.8242	1.45858	0.612951	1.22244	0.8381	3081.81	29.9469	3175.94	14.1622	3236.63	12.5476	3236.63	12.5476	95.2165
AV-2	part 1	81	206.328	48401.2	1.86086	3.34656	0.718737	28.7008	0.978758	0.69755	0.664058	0.67847	3411.35	17.5905	3443.34	9.60382	3462.66	11.1402	3462.66	11.1402	98.5182
AV-2	part 1	83	125.039	20047.1	1.43255	3.93327	0.785859	22.3559	1.07709	0.639692	0.731572	0.679211	3187.81	18.3986	3199.32	10.4687	3207.23	12.49	3207.23	12.49	99.3945
AV-2	part 1	84	221.013	43853.5	1.33467	3.86613	0.730243	21.4941	1.01959	0.603845	0.710774	0.697114	3045.31	17.251	3161.14	9.89286	3236.2	11.5282	3236.2	11.5282	94.1014
AV-2	part 1	85	145.428	32808.1	1.36232	3.85949	0.854648	23.4833	1.1854	0.658785	0.815894	0.688288	3262.44	20.8885	3247.19	11.5452	3238.46	13.5589	3238.46	13.5589	100.74
AV-2	part 1	88	120.737	27069.4	1.74741	3.87742	0.782543	22.7538	1.06115	0.64213	0.701769	0.66133	3197.39	17.6901	3216.47	10.3215	3229.07	12.5599	3229.07	12.5599	99.0188
AV-2	part 1	89	163.386	33086.6	1.07372	3.87992	0.916983	22.669	1.28391	0.639838	0.891892	0.694667	3188.38	22.4337	3212.84	12.4865	3228.82	14.5737	3228.82	14.5737	98.7474
AV-2	part 1	90	174.813	29173.4	1.56611	3.88625	0.82219	22.1538	1.39124	0.626427	1.12055	0.805434	3135.44	27.8221	3190.49	13.5171	3225.97	13.0096	3225.97	13.0096	97.1938
AV-2	part 1	91	144.502	31316.2	1.37596	3.90306	0.806536	22.7589	1.17332	0.646868	0.848604	0.723248	3215.96	21.4873	3216.69	11.4128	3217.82	12.7921	3217.82	12.7921	99.942
AV-2	part 1	92	216.674	35229.6	1.15299	3.84905	0.885242	22.3474	1.16033	0.626284	0.746234	0.643124	3134.88	18.5255	3198.95	11.2776	3240.06	14.0081	3240.06	14.0081	96.7537
AV-2	part 1	93	193.706	31151.1	1.3029	3.85501	0.820294	22.4453	1.17728	0.630095	0.842012	0.715219	3149.97	20.9812	3203.2	11.4445	3237.38	12.9746	3237.38	12.9746	97.2999
AV-2	part 1	94	149.385	31351.3	1.39783	3.87591	0.793736	22.8076	1.106	0.644216	0.75985	0.687027	3205.57	19.192	3218.77	10.7588	3227.68	12.6827	3227.68	12.6827	99.3149
AV-2	part 1	95	196.468	18360.6	0.388547	3.86491	0.706511	24.3017	1.5839	0.685066	1.41125	0.890998	3363.77	36.9865	3280.57	15.4482	3230.79	11.3454	3230.79	11.3454	104.116
AV-2	part 1	96	202.924	30910.3	1.27585	3.87621	0.960446	22.2516	1.39906	0.628577	1.0098	0.721774	3143.96	25.1251	3194.78	13.5957	3227.52	15.2768	3227.52	15.2768	97.411
AV-2	part 1	99	173.563	34045.8	1.57422	3.89003	0.661591	23.3515	0.920473	0.661736	0.638043	0.693169	3273.89	16.3792	3241.7	8.96275	3222.52	10.4695	3222.52	10.4695	101.594
AV-2	part 1	100	164.405	31915.9	1.33674	3.87491	0.847775	22.8438	1.20686	0.644889	0.856864	0.709997	3208.21	21.6561	3220.31	11.7408	3228.54	13.4112	3228.54	13.4112	99.3702
AV-2	part 2	1	153.756	38073.4	1.9112	3.85674	0.792026	23.2681	1.17964	0.652109	0.873167	0.740198	3236.44	22.2177	3238.22	11.4848	3240	12.5048	3240	12.5048	99.8901
AV-2	part 2	2	208.556	29180.3	2.31977	3.89017	0.811421	22.1729	1.12291	0.627025	0.774101	0.689369	3137.81	19.2313	3191.33	10.9103	3225.83	12.8342	3225.83	12.8342	97.2716
AV-2	part 2	3	189.281	33974.6	1.81197	3.84778	0.703781	22.5818	1.97139	0.63272	1.83928	0.932988	3160.34	45.9487	3209.09	19.1706	3240.39	11.1855	3240.39	11.1855	97.5297
AV-2	part 2	4	212.636	62139.6	1.8823	3.34599	0.725625	28.8661	1.20907	0.702849	0.966917	0.79972	3431.44	25.7274	3448.97	11.8662	3459.84	11.2488	3459.84	11.2488	99.1792
AV-2	part 2	5	173.774	40004.3	1.84963	3.85755	0.800493	22.7818	1.1089	0.639829	0.764307	0.68925	3188.34	19.2244	3217.67	10.7865	3236.67	12.6697	3236.67	12.6697	98.5068
AV-2	part 2	7	174.415	30534.2	1.69828	3.88774	0.735328	22.1908	1.13404	0.628318	0.859821	0.758195	3142.93	21.3879	3192.11	11.0187	3223.84	11.6676	3223.84	11.6676	97.4903
AV-2	part 2	8	124.837	28281.5	1.72716	3.85347	0.805115	23.28	1.11622	0.653295	0.770532	0.690307	3241.07	19.6277	3238.72	10.8675	3237.94	12.7343	3237.94	12.7343	100.096
AV-2	part 2	9	219.329	43838.3	1.56123	3.87636	0.768368	23.2823	1.14734	0.65691	0.850949	0.741673	3255.15	21.7486	3238.81	11.1705	3229.39	12.1434	3229.39	12.1434	100.797
AV-2	part 2	10	206.904	20686.6	1.95344	3.37125	0.685021	27.8501	1.05685	0.683865	0.799561	0.756554	3359.17	20.9331	3413.83	10.3594	3446.74	10.7251	3446.74	10.7251	97.4594
AV-2	part 2	11	263.657	52057.6	1.84867	3.36553	0.723459	27.4662	1.02913	0.672419	0.730846	0.710159	3315.2	18.9426	3400.23	10.0829	3451.39	11.2342	3451.39	11.2342	96.0541
AV-2	part 2	13	160.88	3531.44	2.10819	3.81989	0.932496	22.2465	1.57435	0.626231	0.973945	0.618633	3134.67	24.1773	3194.55	15.2992	3233.05	19.5074	3233.05	19.5074	96.957
AV-2	part 2	14	177.615	44654.1	3.0279	3.35065	0.754214	28.2543	1.02864	0.690152	0.697006	0.677602	3383.2	18.3474	3427.96	10.0879	3454.9	11.727	3454.9	11.727	97.9246
AV-2	part 2	15	186.387	4633.82	2.28457	3.33833	0.704603	28.0799	1.07526	0.687736	0.701524	0.652425	3373.98	18.428	3421.89	10.5429	3450.73	12.6363	3450.73	12.6363	97.7758
AV-2	part 2	16	225.448	47432.8	3.3377	3.37492	0.805207	27.3393	1.63384	0.672616	1.42003	0.869135	3315.96	36.8121	3395.69	16.0057	3443.75	12.543	3443.75	12.543	96.2893
AV-2	part 2	17	185.033	38821.5	1.85874	3.87021	0.642214	22.4161	0.910091	0.632651	0.642682	0.706173	3160.07	16.0541	3201.93	8.8465	3228.94	10.168	3228.94	10.168	97.8668
AV-2	part 2	18	185.208	48041.7	1.56351	3.87069	0.772551	22.6891	1.32673	0.640303	1.07812	0.812616	3190.21	27.1299	3213.7	12.9034	3229.07	12.2009	3229.07	12.2009	98.7963
AV-2	part 2	19	220.975	59790.1	2.31111	3.33758	0.813113	28.1159	1.13179	0.684977	0.786425	0.694854	3363.43	20.6091	3423.14	11.0977	3458.95	12.6145	3458.95	12.6145	97.2384
AV-2	part 2	20	206.284	16704.3	1.37347	3.86892	0.735312	20.5478	1.1022	0.581432	0.810206	0.735078	2954.59	19.2028	3117.5	10.6726	3224.84	11.7907	3224.84	11.7907	91.6198
AV-2	part 2	21	157.008	43734.9	2.08561	3.87496	0.737794	22.2231	1.01004	0.628832	0.688602	0.681756	3144.97	17.1374	3193.53	9.81448	3224.85	11.6589	3224.85	11.6589	97.5229
AV-2	part 2	22	228.717	48827.1	2.3014	3.39673	0.848853	27.2913	1.19192	0.676768	0.835999	0.701391	3331.95	21.7517	3393.97	11.6752	3431.47	13.1998	3431.47	13.1998	97.0998
AV-2	part 2	23	179.392	36247.1	3.18753	3.85875	0.545405	22.4728	0.742982	0.633355	0.494999	0.666232	3162.84	12.3734	3204.39	7.22284	3231.17	8.74143	3231.17	8.74143	97.8853
AV-2	part 2	25	142.352	31016.6	1.92191	3.63065	1.1013	24.7335	1.48253	0.65549	0.991193	0.668583	3249.62	25.2999	3297.75	14.4693	3327.82	17.2575	3327.82	17.2575	97.65
AV-2	part 2	26	159.174	6228.67	2.13638	3.33765	0.711276	27.5397	1.00788	0.673727	0.68849	0.683105	3320.24	17.8655	3402.85	9.8756	3452.53	11.4121	3452.53	11.4121	96.1686
AV-2	part 2	27	107.91	19011.2	1.58148	3.88556	0.888264	22.5097	1.29381	0.639051	0.929181	0.718177	3185.29	23.3541	3205.98	12.5789	3219.63	14.2119	3219.63	14.2119	98.9333
AV-2	part 2	28	108.46	21268.5	1.83968	3.87347	0.703309	22.1138	1.05634	0.624815	0.770526	0.729432	3129.05	19.1009	3188.74	10.2622	3227.19	11.4039	3227.19	11.4039	96.9591
AV-2	part 2	29	241.623	7633.62	1.63906	3.90042	0.644801	19.0895	1.1401	0.545121	0.939177	0.82377	2804.85	21.3598	3046.35	11.0005	3210.43	10.2086	3210.43	10.2086	87.3668
AV-2	part 2	30	188.529	49128	2.14451	3.88831	0.683636	22.5045	0.990237	0.637588	0.714627	0.721673	3179.53	17.9364	3205.76	9.62721	3222.89	10.8168	3222.89	10.8168	98.6547
AV-2	part 2	31	149.226	30010	1.56838	3.88537	1.21635	22.1009	1.68345	0.626019	1.16217	0.69035	3133.83	28.8437	3188.17	16.3549	3223.23	19.2223	3223.23	19.2223	97.2264
AV-2	part 2	32	135.248	10133.9	1.26933	3.86032	0.728032	20.824	1.59609	0.587653	1.39728	0.875437	2979.9	33.3404	3130.43	15.4651	3229.11	12.173	3229.11	12.173	92.2822
AV-2	part 2	33	160.305	23566.1	1.27213	3.93735	0.761247	21.1609	1.05599	0.606952	0.729635	0.690952	3057.79	17.7655	3145.99	10.2388	3203.44	12.0643	3203.44	12.0643	95.4532
AV-2	part 2	34	229.409	24591.7	2.35427	3.90195	0.653176	20.9288	1.03633	0.594844	0.800669	0.772599	3009.03	19.2512	3135.3	10.0432	3217.84	10.3864	3217.84	10.3864	93.511
AV-2	part 2	35	139.62	28988.4	1.87729	3.8594	0.564942	22.1814	0.778903	0.623387	0.533491	0.684926	3123.38	13.2063	3191.7	7.56781	3235.61	8.95029	3235.61	8.95029	96.5315
AV-2	part 2	36	189.222	24841.9	2.13633	3.34704	0.819751	26.6218	1.1518	0.648813	0.801371	0.695757	3223.56	20.3283	3369.66	11.2722	3458.39	12.8226	3458.39	12.8226	93.2099
AV-2	part 2	37	112.513	23678.1	1.74655	3.87778	0.877792	22.2891	1.44562	0.629602	1.1432	0.790802	3148.01	28.4726	3196.41	14.0492	3227.6	13.9588	3227.6	13.9588	97.5342
AV-2	part 2	38	175.622	20560.5	1.52455	3.84042	0.744826	20.4859	1.08551	0.571754	0.787407	0.725377	2915.02	18.4648	3114.58	10.5095	3246.55	11.7739	3246.55	11.7739	89.7881
AV-2	part 2	40	156.044	38373.3	1.41386	3.87956	0.965448	23.1382	1.49356	0.651733	1.13678	0.76112	3234.97	28.9152	3232.77	14.5381	3232.08	15.2826	3232.08	15.2826	100.09
AV-2	part 2	41	144.501	26330.2	2.96518	3.8722	0.66681	22.1157	1.18838	0.622065	0.982472	0.826734	3118.13	24.2889	3188.82	11.5451	3234.28	10.5452	3234.28	10.5452	96.4088
AV-2	part 2	42	167.627	26593	1.22105	3.85788	0.774331	21.9327	1.09294	0.614624	0.765553	0.700453	3088.49	18.7859	3180.75	10.614	3240.15	12.2973	3240.15	12.2973	95.3193
AV-2	part 2	43	288.734	66744.3	1.68246	3.25026	0.755563	29.0688	1.06264	0.685562	0.746917	0.702889	3365.67	19.5837	3455.84	10.4314	3509.21	11.6769	3509.21	11.6769	95.9097
AV-2	part 2	44	157.571	8961.66	1.08088	3.83667	0.710533	20.1875	1.68446	0.563463	1.47876	0.877888	2880.92	34.3557	3100.38	16.2978	3246.45	12.7102	3246.45	12.7102	88.7407
AV-2	part 2	45	268.983	9142.4	1.62939	3.95847	0.788682	18.8539	1.66585	0.543016	1.424	0.854818	2796.06	32.3053	3034.37	16.0641	3196.91	13.6746	3196.91	13.6746	87.4613
AV-2	part 2	46	154.663	17454.7	0.800355	3.87748	0.796416	22.7936	1.13828	0.642511	0.785949	0.690468	3198.88	19.8192	3218.17	11.0726	3230.9	12.9908	3230.9	12.9908	99.009
AV-2	part 2	47	127.649	8897.83	0.842803	3.89332	0.788436	19.041	2.33737	0.540254	2.18294	0.933933	2784.51	49.36	3043.89	22.5527	3220.57	13.1874	3220.57	13.1874	86.4603
AV-2	part 2	48	255.894	60130.1	0.756099	3.86814	0.786828	22.3596	1.06099	0.627711	0.709791	0.668991	3140.53	17.6454	3199.48	10.3122	3237.33	12.4353	3237.33	12.4353	97.01
AV-2	part 2	49	192.36	24847.3	0.999713	3.87608	0.877311	21.8281	1.13264	0.615165	0.697249	0.615597	3090.65	17.1191	3176.11	10.9973	3231.23	14.0822	3231.23	14.0822	95.6494
AV-2	part 2	50	248.569	11670.7	1.12962	3.85611	0.947242	21.3283	1.41532	0.599111	1.02555	0.724611	3026.26	24.769	3153.63	13.7281	3236.4	15.3819	3236.4	15.3819	93.5069
AV-2	part 2	51	265.764	10953.6	1.77231	3.90978	0.74076	19.2622	1.52616	0.548984	1.33031	0.871674	2820.94	30.394	3055.04	14.7326	3213.5	11.8114	3213.5	11.8114	87.7841
AV-2	part 2	52	258.133	25134.5	0.958151	3.86016	0.788686	21.0093	1.41007	0.589841	1.15725	0.820706	2988.78	27.6777	3139.02	13.6679	3237.23	12.7042	3237.23	12.7042	92.3251
AV-2	part 2	54	257.371	49465.9	1.17262	3.86647	0.768913	22.3562	1.02883	0.627571	0.680814	0.661736	3139.98	16.9227	3199.33	9.99962	3237.44	12.1632	3237.44	12.1632	96.9894
AV-2	part 2	56	164.848	20762.1	1.33974	3.92513	0.702746	21.5506	1.20728	0.615449	0.975599	0.808099	3091.78	23.9602	3163.69	11.7154	3210.3	11.2326	3210.3	11.2326	96.3081
AV-2	part 2	57	225.889	41491.7	1.2204	3.86553	0.657627	21.7873	0.953167	0.612128	0.683264	0.716836	3078.52	16.7244	3174.29	9.25383	3236.08	10.4808	3236.08	10.4808	95.1311
AV-2	part 2	58	122.062	25573.7	1.74692	3.8637	0.954315	22.2389	1.44668	0.624903	1.08351	0.748967	3129.4	26.8621	3194.22	14.0581	3235.86	15.1176	3235.86	15.1176	96.7099
AV-2	part 2	59	175.767	35503.8	1.3755	3.86899	0.678922	23.208	0.985611	0.653103	0.71358	0.723997	3240.32	18.1737	3235.7	9.59461	3233.52	10.7242	3233.52	10.7242	100.21
AV-2	part 2	61	126.777	15565	1.78981	3.34695	0.733055	28.9034	1.2072	0.705441	0.957813	0.793415	3441.25	25.5403	3450.24	11.8484	3456.14	11.3897	3456.14	11.3897	99.5692
AV-2	part 2	62	104.521	24142.2	1.72629	3.85795	0.836842	22.6484	1.12903	0.636914	0.753902	0.667742	3176.87	18.9099	3211.95	10.9797	3234.61	13.2558	3234.61	13.2558	98.215
AV-2	part 2	63	124.107	23768.1	1.71036	3.85414	0.686519	23.0482	1.07587	0.647528	0.817285	0.75965	3218.54	20.7071	3228.98	10.4703	3236.14	11.034	3236.14	11.034	99.456
AV-2	part 2	64	168.125	9149.21	1.81139	3.94612	0.796999	20.5823	1.70764	0.594621	1.49119	0.873244	3008.13	35.8458	3119.13	16.5372	3192.05	13.1681	3192.05	13.1681	94.2383
AV-2	part 2	65	170.727	14428.1	1.10208	3.91221	0.718416	21.2199	1.0819	0.606705	0.801473	0.740804	3056.79	19.5097	3148.69	10.4914	3208.48	11.4806	3208.48	11.4806	95.2722
AV-2	part 2	66	149.438	32522	1.37459	3.84871	0.916639	22.3289	1.35138	0.627005	0.990576	0.73301	3137.73	24.6088	3198.15	13.1342	3236.94	14.4958	3236.94	14.4958	96.9352
AV-2	part 2	67	75.3848	18481.2	0.683326	3.89558	0.918789	24.5014	1.24966	0.697026	0.8431	0.674662	3409.36	22.3233	3288.55	12.1919	3216.39	14.5645	3216.39	14.5645	106
AV-2	part 2	68	112.614	7592.66	2.01388	3.86918	0.766916	21.8672	1.28782	0.620177	0.964582	0.749004	3110.62	23.8019	3177.85	12.5051	3221.24	13.4674	3221.24	13.4674	96.5659
AV-2	part 2	69	251.592	14635.8	2.7813	3.85492	0.657033	20.9664	1.0787	0.589494	0.851616	0.789484	2987.37	20.3603	3137.04	10.4547	3234.93	10.4421	3234.93	10.4421	92.3473
AV-2	part 2	70	101.756	13165.1	1.70364	3.89865	1.15021	21.0651	1.78297	0.5992	1.35427	0.759558	3026.61	32.7111	3141.59	17.2851	3216.57	18.3126	3216.57	18.3126	94.0944
AV-2	part 2	71	260.826	16633.9	1.14085	3.94019	0.715153	20.6989	1.4592	0.594682	1.27013	0.870425	3008.38	30.5337	3124.6	14.1346	3200.82	11.3599	3200.82	11.3599	93.9876
AV-2	part 2	72	144.145	29551.4	2.07096	3.65897	0.841442	25.3688	1.13964	0.675949	0.767487	0.673444	3328.79	19.9546	3322.52	11.1334	3319.41	13.1997	3319.41	13.1997	100.283
AV-2	part 2	74	212.073	48629.8	1.9738	3.34873	0.595091	28.3992	0.777618	0.691123	0.500051	0.643054	3386.9	13.1739	3432.98	7.62737	3460.65	9.22675	3460.65	9.22675	97.869
AV-2	part 2	77	261.441	12399.3	1.14406	3.89083	0.893143	19.1696	1.52748	0.544434	1.21163	0.793222	2801.98	27.5339	3050.39	14.7419	3219.03	14.6836	3219.03	14.6836	87.0444
AV-2	part 2	78	118.821	28560.3	1.81784	3.36102	0.754838	28.1028	1.01692	0.688909	0.677948	0.666669	3378.45	17.8267	3422.69	9.97114	3449.35	11.7604	3449.35	11.7604	97.9445
AV-2	part 2	79	179.363	12096.4	1.52553	3.87193	0.673454	21.2284	2.01307	0.600866	1.88866	0.938197	3033.32	45.6984	3149.08	19.5232	3224.38	10.9933	3224.38	10.9933	94.0747
AV-2	part 2	80	203.445	52992.5	1.9396	3.85449	0.783628	22.4764	1.07428	0.631635	0.734463	0.683682	3156.05	18.3287	3204.55	10.4437	3235.72	12.3642	3235.72	12.3642	97.5379
AV-2	part 2	82	139.564	30925.5	2.08232	3.86275	0.754089	22.6552	1.23328	0.638375	0.972204	0.788306	3182.63	24.4197	3212.25	11.9937	3231.47	11.9714	3231.47	11.9714	98.4884
AV-2	part 2	83	184.319	44779.1	2.60013	3.3352	0.739037	28.758	1.02435	0.699926	0.708672	0.691823	3420.37	18.8099	3445.29	10.0519	3460.49	11.4616	3460.49	11.4616	98.8406
AV-2	part 2	84	215.078	43263.8	1.41999	3.87287	0.672151	22.0254	1.09531	0.622626	0.86415	0.788957	3120.36	21.3756	3184.85	10.6389	3226.4	10.622	3226.4	10.622	96.7132
AV-2	part 2	85	139.283	30653.3	1.97929	3.873	0.835131	22.396	1.11813	0.633369	0.741485	0.66315	3162.9	18.5351	3201.06	10.8684	3225.74	13.2045	3225.74	13.2045	98.0519
AV-2	part 2	86	172.149	20354.4	1.07255	3.85618	0.556144	23.8859	0.976499	0.672992	0.793343	0.812436	3317.41	20.573	3263.75	9.51706	3231.61	8.98209	3231.61	8.98209	102.655
AV-2	part 2	87	113.666	26934.3	2.57204	3.86544	0.809172	23.1495	1.04618	0.65351	0.659433	0.630324	3241.9	16.801	3233.25	10.1832	3228.56	12.8164	3228.56	12.8164	100.413
AV-2	part 2	89	127.719	23723.2	2.1568	3.92163	0.72018	23.2458	0.975597	0.665398	0.64929	0.665531	3288.08	16.7233	3237.29	9.49775	3206.65	11.5046	3206.65	11.5046	102.539
AV-2	part 2	91	228.048	6474.58	1.44715	3.99157	0.79212	18.6191	2.25758	0.543389	2.10364	0.931814	2797.62	47.7456	3022.29	21.758	3175.99	12.9835	3175.99	12.9835	88.0864
AV-2	part 2	92	204.369	15527.4	2.75069	3.36726	0.694233	25.2104	1.01156	0.617665	0.701886	0.693867	3100.62	17.2763	3316.4	9.87963	3450.21	11.3013	3450.21	11.3013	89.8676
AV-2	part 2	93	252.042	7317.61	1.04379	3.92094	0.720638	20.221	1.22898	0.578987	0.977121	0.795063	2944.62	23.0972	3101.99	11.8914	3206.18	11.7778	3206.18	11.7778	91.8418
AV-2	part 2	94	161.996	38863.1	1.97547	3.8623	0.69917	23.3635	1.29579	0.656083	1.08965	0.840914	3251.93	27.8281	3242.2	12.6178	3236.87	11.0581	3236.87	11.0581	100.465
AV-2	part 2	95	148.27	35327.5	2.26892	3.85781	0.757225	23.4196	1.04176	0.656962	0.709482	0.681044	3255.35	18.1338	3244.54	10.145	3238.55	12.0276	3238.55	12.0276	100.519
AV-2	part 2	96	168.58	31618.4	1.61181	3.87707	0.722541	23.2552	1.09712	0.6557	0.824378	0.751402	3250.43	21.046	3237.68	10.6811	3230.46	11.4219	3230.46	11.4219	100.618
AV-2	part 2	97	255.235	7603.25	1.95542	3.46057	0.895118	23.723	1.5913	0.59909	1.31536	0.826596	3026.17	31.7677	3257.08	15.5054	3403.15	13.9388	3403.15	13.9388	88.9227
AV-2	part 2	98	145.537	33584.7	2.05596	3.85706	0.738241	23.3043	1.33054	0.653639	1.10582	0.831108	3242.41	28.1776	3239.73	12.9549	3238.76	11.6665	3238.76	11.6665	100.113
AV-2	part 2	99	216.456	53378.7	3.08559	3.34305	0.835563	28.8455	1.0687	0.700632	0.66508	0.622327	3423.05	17.6633	3448.28	10.4882	3463.63	12.961	3463.63	12.961	98.8284
AV-3	part 1	1	295.176	28212.1	2.67822	3.89277	0.677063	23.5513	1.23559	0.662539	1.03002	0.833632	3277.01	26.4611	3250	12.0355	3234.06	10.7641	3234.06	10.7641	101.328
AV-3	part 1	3	129.615	45894.5	1.08289	3.85617	0.722045	23.2215	0.953551	0.64796	0.618471	0.648598	3220.23	15.6762	3236.27	9.28272	3246.9	11.4358	3246.9	11.4358	99.1787
AV-3	part 1	4	208.274	66383.6	2.5337	3.86636	0.706817	24.0201	1.11818	0.671827	0.864417	0.773058	3312.92	22.3929	3269.21	10.9004	3243.18	11.1795	3243.18	11.1795	102.15
AV-3	part 1	9	219.542	29086.3	2.58164	3.86613	0.775916	23.699	1.22721	0.664647	0.942921	0.768345	3285.18	24.2697	3256.09	11.9569	3238.9	12.3842	3238.9	12.3842	101.429
AV-3	part 1	17	254.013	52755.1	2.248	3.86674	0.703958	22.6643	1.03016	0.639444	0.750487	0.728514	3186.83	18.8699	3212.64	10.0184	3229.47	11.1351	3229.47	11.1351	98.6799
AV-3	part 1	18	164.233	29939.9	3.3023	3.85144	0.727856	23.2692	1.00684	0.65429	0.690725	0.686031	3244.94	17.611	3238.27	9.80237	3234.81	11.5538	3234.81	11.5538	100.313
AV-3	part 1	19	267.7	36045.3	2.50717	3.85029	0.745878	23.2912	1.06631	0.65573	0.760153	0.712883	3250.55	19.4069	3239.19	10.3817	3232.83	11.796	3232.83	11.796	100.548
AV-3	part 1	20	168.729	7829.85	3.03301	3.81258	0.695493	22.9233	1.10517	0.641624	0.789261	0.714154	3195.4	19.886	3223.69	10.753	3242.02	12.1942	3242.02	12.1942	98.562
AV-3	part 1	22	215.097	3537.43	1.95551	3.7756	0.716501	24.452	1.48785	0.681796	0.867447	0.58302	3351.25	22.6696	3286.59	14.5148	3248.06	19.0455	3248.06	19.0455	103.177
AV-3	part 1	23	207.565	51721.3	3.16261	3.86994	0.798482	23.3616	1.10354	0.66085	0.759269	0.688033	3270.45	19.4755	3242.13	10.7456	3225.33	12.6353	3225.33	12.6353	101.399
AV-3	part 1	24	245.248	13369	2.51531	3.84161	0.71666	23.8084	1.11521	0.670036	0.824494	0.73932	3306.01	21.3245	3260.58	10.8676	3233.44	11.845	3233.44	11.845	102.245
AV-3	part 1	26	188.656	53548.4	2.56131	3.86356	0.814313	23.9092	1.18457	0.6752	0.859118	0.725258	3325.91	22.3223	3264.7	11.5455	3227.99	12.8701	3227.99	12.8701	103.034
AV-3	part 1	27	139.75	6112.75	3.00092	3.88036	0.750167	23.4949	1.3213	0.670327	1.08446	0.820748	3307.14	28.0556	3247.67	12.8693	3211.83	11.922	3211.83	11.922	102.967
AV-3	part 1	28	194.361	8078.5	1.90738	3.79783	0.839839	23.947	1.27621	0.665908	0.93279	0.730904	3290.06	24.0363	3266.24	12.4396	3252.32	13.7179	3252.32	13.7179	101.16
AV-3	part 1	29	224.841	33268.4	2.6462	3.85377	0.660133	23.7472	1.00349	0.667612	0.749547	0.74694	3296.65	19.3441	3258.07	9.77784	3235.09	10.523	3235.09	10.523	101.903
AV-3	part 1	30	251.227	10317.7	3.0217	3.86841	0.640438	23.4606	0.926436	0.663863	0.579998	0.626053	3282.14	14.9179	3246.24	9.02254	3224.81	11.3983	3224.81	11.3983	101.778
AV-3	part 1	32	319.951	121001	1.56685	3.863	0.704116	23.658	0.967414	0.666114	0.663234	0.685574	3290.86	17.0935	3254.4	9.42486	3232.7	11.1098	3232.7	11.1098	101.799
AV-3	part 1	33	248.06	8947.56	1.78655	3.85053	0.805301	23.0863	1.1883	0.649798	0.871188	0.733137	3227.41	22.1197	3230.58	11.5654	3233.23	12.7477	3233.23	12.7477	99.8202
AV-3	part 1	36	195.201	21606.1	2.21697	3.8785	0.698611	23.3063	1.00851	0.659008	0.716724	0.710678	3263.3	18.3533	3239.82	9.81921	3225.99	11.1984	3225.99	11.1984	101.157
AV-3	part 1	38	134.977	27175.2	1.86959	3.84828	0.694406	23.972	0.962828	0.675474	0.655379	0.680682	3326.97	17.0327	3267.25	9.38517	3231.48	11.1278	3231.48	11.1278	102.955
AV-3	part 1	39	242.801	57295.9	4.67241	3.86475	0.732134	22.856	0.989853	0.647687	0.665189	0.672008	3219.16	16.856	3220.83	9.62977	3222.54	11.5678	3222.54	11.5678	99.8951
AV-3	part 1	41	312.479	83646.2	2.8532	3.86274	0.854638	22.7118	1.17714	0.643121	0.809049	0.6873	3201.27	20.4135	3214.67	11.4489	3223.72	13.4929	3223.72	13.4929	99.3037
AV-3	part 1	42	282.045	53058.2	2.42131	3.85855	0.750692	22.8436	1.21298	0.646334	0.9505	0.783609	3213.87	24.0553	3220.3	11.8004	3224.99	11.8899	3224.99	11.8899	99.655
AV-3	part 1	44	214.203	20709.8	2.53733	3.84741	0.670398	23.5315	1.25069	0.663223	1.04454	0.835173	3279.66	26.8506	3249.18	12.1822	3231.1	10.8523	3231.1	10.8523	101.503
AV-3	part 1	46	295.906	39667.1	2.26746	3.86105	0.639908	22.947	0.976109	0.646056	0.731924	0.749839	3212.78	18.5187	3224.7	9.49764	3232.8	10.1875	3232.8	10.1875	99.3806
AV-3	part 1	47	260.593	42057.1	2.2988	3.86178	0.68781	23.3976	1.0432	0.658823	0.783872	0.751408	3262.58	20.0694	3243.62	10.1587	3232.6	10.8586	3232.6	10.8586	100.928
AV-3	part 1	49	200.423	3.01764e+06	2.71308	3.86774	0.886124	22.9017	1.39528	0.647635	1.07777	0.77244	3218.96	27.3097	3222.77	13.5755	3225.82	13.9813	3225.82	13.9813	99.7872
AV-3	part 1	52	214.448	70067.2	2.62298	3.85543	0.756468	22.7277	1.27865	0.641031	1.03036	0.805823	3193.07	25.9461	3215.35	12.4366	3229.96	11.9467	3229.96	11.9467	98.8579
AV-3	part 1	53	182.388	48360.8	15.2244	3.67642	0.883947	24.9251	1.14691	0.671059	0.7287	0.635357	3309.96	18.8641	3305.29	11.1968	3303.13	13.8946	3303.13	13.8946	100.207
AV-3	part 1	54	235.153	27624	2.92311	3.87215	0.712894	22.4283	1.0496	0.636436	0.7634	0.727324	3174.99	19.1394	3202.46	10.2029	3220.39	11.3693	3220.39	11.3693	98.5904
AV-3	part 1	55	200.623	42882.6	3.05171	3.86429	0.791022	22.852	1.24241	0.646797	0.957166	0.77041	3215.68	24.2346	3220.66	12.0869	3224.44	12.4985	3224.44	12.4985	99.7283
AV-3	part 1	57	213.107	62410.4	2.01305	3.87298	0.765098	23.4676	1.10961	0.666066	0.802955	0.723637	3290.67	20.6936	3246.53	10.8067	3220.06	12.088	3220.06	12.088	102.193
AV-3	part 1	58	249.159	21068.9	3.03623	3.84316	0.782276	23.3016	1.09896	0.654268	0.766445	0.697424	3244.86	19.5412	3239.62	10.6999	3237.06	12.4195	3237.06	12.4195	100.241
AV-3	part 1	62	272.103	72192.6	2.13559	3.87265	0.660831	23.467	1.09252	0.66021	0.869586	0.795942	3267.97	22.2921	3246.51	10.6403	3233.96	10.4321	3233.96	10.4321	101.052
AV-3	part 1	63	208.889	37823.9	2.5407	3.86422	0.737739	23.5972	1.30156	0.662765	1.06892	0.82126	3277.88	27.4659	3251.9	12.6791	3236.59	11.7108	3236.59	11.7108	101.276
AV-3	part 1	64	166.806	47665.1	2.19007	3.86465	0.709028	23.39	1.26825	0.659488	1.04818	0.826476	3265.17	26.8527	3243.31	12.3502	3230.5	11.2651	3230.5	11.2651	101.073
AV-3	part 1	66	66.1006	19879.5	1.2799	3.19333	0.969338	30.8708	1.25657	0.719699	0.796765	0.63408	3494.92	21.4955	3514.94	12.3592	3527.04	14.9868	3527.04	14.9868	99.0892
AV-3	part 1	67	306.39	22124.8	1.961	3.86278	0.807453	22.8815	1.21262	0.645478	0.899921	0.742127	3210.51	22.7569	3221.92	11.7977	3229.7	12.8245	3229.7	12.8245	99.406
AV-3	part 1	68	275.427	55878.8	1.63301	3.88357	0.848044	23.2819	1.32889	0.659574	1.02213	0.769159	3265.5	26.1874	3238.8	12.9383	3222.98	13.402	3222.98	13.402	101.319
AV-3	part 1	69	230.025	28884	3.14078	3.85395	0.645851	22.7375	0.983894	0.640923	0.736857	0.748919	3192.65	18.5533	3215.77	9.56971	3230.91	10.2865	3230.91	10.2865	98.8158
AV-3	part 1	72	35.5417	6902.54	1.37049	3.2059	1.05419	29.6552	1.30779	0.697497	0.745561	0.570093	3411.15	19.7486	3475.45	12.8466	3513.4	16.5879	3513.4	16.5879	97.0899
AV-3	part 1	73	254.971	38885.9	4.93443	3.89798	0.977701	21.9614	1.72706	0.626474	1.42298	0.823937	3135.63	35.3328	3182.02	16.774	3212.09	15.4586	3212.09	15.4586	97.6195
AV-3	part 1	74	305.639	12906.1	3.4193	3.87095	0.604983	23.0259	0.955623	0.653646	0.688546	0.720521	3242.43	17.545	3228.04	9.29963	3219.78	10.4591	3219.78	10.4591	100.704
AV-3	part 1	75	211.335	10083.6	1.80276	3.89499	0.753447	22.3089	1.20991	0.637832	0.906913	0.749568	3180.49	22.7679	3197.27	11.7587	3208.51	12.6524	3208.51	12.6524	99.1268
AV-3	part 1	77	220.03	43211.9	3.93777	3.86949	0.752454	22.4328	1.14482	0.635166	0.86117	0.752234	3169.99	21.5642	3202.66	11.1287	3223.86	11.9027	3223.86	11.9027	98.329
AV-3	part 1	81	289.417	71050.1	3.03635	3.87179	0.750964	22.4669	1.2497	0.634451	0.997319	0.798044	3167.17	24.9563	3204.13	12.1491	3228.03	11.8841	3228.03	11.8841	98.1145
AV-3	part 1	85	214.494	27662.5	2.81755	3.8479	0.818986	23.1842	1.29775	0.651243	1.00408	0.773707	3233.06	25.5282	3234.7	12.6329	3236.4	12.9659	3236.4	12.9659	99.8967
AV-3	part 1	86	227.198	56757	2.68134	3.88746	0.705741	22.9023	1.14087	0.649457	0.895642	0.78505	3226.08	22.7334	3222.8	11.1	3221.43	11.153	3221.43	11.153	100.144
AV-3	part 1	87	243.426	28989.6	3.04451	3.84983	0.794892	22.575	1.01096	0.634413	0.609052	0.602448	3167.02	15.24	3208.8	9.83002	3235.7	12.7257	3235.7	12.7257	97.8775
AV-3	part 1	89	242.915	10891	3.23583	3.88041	0.971175	21.3222	1.39364	0.604869	0.996502	0.715037	3049.43	24.2114	3153.35	13.5176	3220.85	15.3784	3220.85	15.3784	94.6776
AV-3	part 1	93	228.845	12126.5	2.92778	3.83758	0.664568	22.9903	1.05741	0.644203	0.816165	0.771852	3205.52	20.6141	3226.53	10.2896	3240.3	10.5989	3240.3	10.5989	98.9265
AV-3	part 1	94	185.734	22187.2	2.4303	3.84196	0.69125	23.1743	1.01637	0.648904	0.738957	0.727059	3223.92	18.7467	3234.29	9.89341	3241.4	11	3241.4	11	99.4608
AV-3	part 1	95	182.837	30547.6	2.60468	3.86635	0.899054	21.9162	1.30205	0.617281	0.939664	0.721681	3099.09	23.1201	3180.02	12.6445	3232.16	14.2187	3232.16	14.2187	95.8829
AV-3	part 1	96	280.171	49752.5	2.21094	3.33375	0.911913	28.873	1.3039	0.700709	0.931432	0.714342	3423.34	24.7388	3449.21	12.7971	3464.93	14.1369	3464.93	14.1369	98.7997
AV-3	part 1	100	232.364	13493	3.60698	3.83233	0.895619	22.3558	1.21871	0.623658	0.805252	0.660741	3124.46	19.939	3199.32	11.8453	3247.27	14.4135	3247.27	14.4135	96.2179
AV-3	part 2	1	254.124	77855.8	2.86958	3.81345	0.652379	22.977	0.880019	0.640369	0.588643	0.668899	3190.47	14.8136	3225.97	8.56309	3248.79	10.3058	3248.79	10.3058	98.2046
AV-3	part 2	2	279.858	98187.1	3.4136	3.85814	0.619357	22.0248	0.901662	0.620963	0.654595	0.725987	3113.75	16.1653	3184.82	8.75791	3230.58	9.78328	3230.58	9.78328	96.3837
AV-3	part 2	3	257.632	161331	2.88071	3.84256	0.736844	22.1627	1.00604	0.621352	0.68476	0.680652	3115.29	16.9168	3190.89	9.7744	3239.44	11.6201	3239.44	11.6201	96.1677
AV-3	part 2	9	290.701	130316	2.35151	3.83719	0.611575	22.019	0.8725	0.615983	0.622142	0.713057	3093.91	15.2876	3184.57	8.47455	3242.86	9.64164	3242.86	9.64164	95.4068
AV-3	part 2	11	271.481	716650	3.55855	3.85649	0.923726	22.5828	1.2862	0.633073	0.895008	0.695852	3161.73	22.3664	3209.14	12.5067	3239.58	14.5637	3239.58	14.5637	97.5971
AV-3	part 2	14	305.497	432257	3.35797	3.85792	0.725385	22.413	1.07269	0.627142	0.79019	0.736646	3138.28	19.6332	3201.8	10.427	3242.52	11.4344	3242.52	11.4344	96.7851
AV-3	part 2	16	283.035	298504	2.1098	3.8581	1.20422	22.6	1.70696	0.63243	1.20974	0.708711	3159.19	30.2129	3209.88	16.5993	3242.38	18.9825	3242.38	18.9825	97.4343
AV-3	part 2	17	329.239	460939	2.65356	3.86578	0.80845	22.4456	1.24566	0.629329	0.947638	0.760751	3146.93	23.5956	3203.21	12.1093	3239.32	12.7469	3239.32	12.7469	97.1479
AV-3	part 2	18	277.795	368547	2.38779	3.86582	0.736156	22.5644	1.00971	0.632682	0.691013	0.684365	3160.19	17.2619	3208.35	9.81769	3239.27	11.6075	3239.27	11.6075	97.5586
AV-3	part 2	23	286.744	100654	2.7203	3.82952	0.740257	23.5828	1.12474	0.657167	0.846714	0.752812	3256.15	21.6454	3251.31	10.9562	3249	11.6633	3249	11.6633	100.22
AV-3	part 2	24	238.731	316073	3.55873	3.8729	0.750793	23.148	1.12966	0.652181	0.843961	0.747095	3236.72	21.476	3233.18	10.9958	3231.67	11.8463	3231.67	11.8463	100.156
AV-3	part 2	25	267.05	459038	2.45487	3.86298	0.723729	22.983	1.14828	0.64585	0.891484	0.776365	3211.97	22.5515	3226.22	11.1737	3235.77	11.414	3235.77	11.414	99.2644
AV-3	part 2	28	261.49	258868	2.17371	3.86357	0.737417	23.0777	1.11015	0.65001	0.829819	0.747483	3228.24	21.0735	3230.22	10.8045	3232.13	11.6337	3232.13	11.6337	99.8799
AV-3	part 2	29	380.709	146263	2.65262	3.88343	0.810797	22.3132	1.26323	0.631786	0.968603	0.766766	3156.65	24.1754	3197.46	12.277	3223.84	12.7959	3223.84	12.7959	97.9157
AV-3	part 2	31	299.498	222958	1.43065	3.87227	0.785142	23.2152	1.07162	0.655372	0.729309	0.680569	3249.16	18.6133	3236.01	10.432	3228.54	12.3899	3228.54	12.3899	100.639
AV-3	part 2	32	244.88	120532	2.53277	3.85205	0.665885	23.2719	0.945147	0.653642	0.670383	0.70929	3242.42	17.0821	3238.38	9.20172	3236.56	10.5066	3236.56	10.5066	100.181
AV-3	part 2	35	370.632	448012	2.46685	3.86789	0.635345	22.6883	1.17514	0.640881	0.988554	0.841224	3192.48	24.8898	3213.67	11.4289	3227.59	10.0272	3227.59	10.0272	98.9121
AV-3	part 2	36	250.64	299354	3.21521	3.85633	0.766377	22.9493	1.34197	0.646344	1.10157	0.820863	3213.91	27.879	3224.79	13.0579	3232.25	12.0908	3232.25	12.0908	99.4326
AV-3	part 2	37	171.964	94733.2	3.55423	3.85708	0.819693	22.4895	1.34291	0.633705	1.06363	0.792032	3164.23	26.5964	3205.11	13.0559	3231.47	12.9338	3231.47	12.9338	97.9189
AV-3	part 2	42	256.309	226875	2.68613	3.86697	0.909205	23.1279	1.27796	0.65278	0.897945	0.702642	3239.06	22.8624	3232.34	12.439	3228.85	14.349	3228.85	14.349	100.316
AV-3	part 2	43	312.846	210128	2.70706	3.87545	0.734458	22.617	1.16709	0.639769	0.906898	0.777057	3188.11	22.8097	3210.61	11.3492	3225.37	11.5902	3225.37	11.5902	98.8449
AV-3	part 2	48	194.872	103781	4.34565	3.87531	0.685505	23.4437	1.06735	0.663613	0.817992	0.766379	3281.17	21.0344	3245.54	10.3946	3224.28	10.8185	3224.28	10.8185	101.765
AV-3	part 2	49	105.115	54796.9	1.93271	3.84525	0.785926	22.7202	1.01311	0.638367	0.63828	0.630021	3182.59	16.0321	3215.04	9.85358	3236.01	12.4076	3236.01	12.4076	98.3492
AV-3	part 2	50	222.451	127214	3.59565	3.86537	0.74574	22.046	1.10245	0.624809	0.81187	0.736426	3129.03	20.1257	3185.75	10.7087	3222.35	11.77	3222.35	11.77	97.1038
AV-3	part 2	51	368.224	197462	2.65723	3.87812	0.719959	21.8719	1.05782	0.62361	0.774815	0.732465	3124.27	19.1844	3178.05	10.2717	3212.87	11.3731	3212.87	11.3731	97.2421
AV-3	part 2	52	255.298	251847	4.35816	3.85789	0.71061	22.784	1.11908	0.646198	0.864494	0.772505	3213.33	21.8759	3217.76	10.8856	3221.2	11.2153	3221.2	11.2153	99.7558
AV-3	part 2	55	295.47	419184	3.19699	3.87191	0.737138	22.1946	1.08471	0.630728	0.795749	0.733605	3152.47	19.8407	3192.28	10.5395	3218.07	11.6367	3218.07	11.6367	97.9614
AV-3	part 2	56	102.334	221537	1.86652	3.86977	0.748873	23.9543	1.93807	0.680417	1.7875	0.922306	3345.96	46.6584	3266.54	18.8925	3218.81	11.8231	3218.81	11.8231	103.95
AV-3	part 2	57	275.85	390985	3.53121	3.85596	0.917367	22.5398	1.35059	0.638949	0.991222	0.733915	3184.89	24.911	3207.28	13.1319	3221.99	14.4788	3221.99	14.4788	98.8482
AV-3	part 2	59	257.786	297263	3.19257	3.86177	0.878467	22.4204	1.37673	0.637014	1.05999	0.769931	3177.27	26.59	3202.12	13.383	3218.4	13.8693	3218.4	13.8693	98.722
AV-3	part 2	60	276.626	105946	3.31281	3.87578	0.636756	21.5837	0.890769	0.615623	0.622577	0.698922	3092.48	15.2928	3165.18	8.64442	3212.29	10.0607	3212.29	10.0607	96.2702
AV-3	part 2	61	212.541	299492	3.30424	3.86175	0.718173	22.6079	0.9649	0.642337	0.644348	0.667787	3198.2	16.2458	3210.22	9.38269	3218.41	11.3376	3218.41	11.3376	99.3719
AV-3	part 2	62	280.333	70522.3	2.83657	3.80606	0.749367	22.5928	1.15601	0.634677	0.880137	0.761355	3168.06	22.0288	3209.57	11.2409	3236.29	11.8195	3236.29	11.8195	97.8917
AV-3	part 2	66	311.558	775378	2.83934	3.86696	0.625126	22.6503	0.849798	0.644354	0.575639	0.677383	3206.11	14.5411	3212.04	8.26404	3216.41	9.86903	3216.41	9.86903	99.6797
AV-3	part 2	71	277.518	437226	2.90127	3.86363	0.668984	22.9118	1.10168	0.648851	0.875302	0.794515	3223.71	22.2045	3223.2	10.7189	3223.56	10.556	3223.56	10.556	100.005
AV-3	part 2	73	281.044	476830	2.56525	3.89426	0.696379	22.122	1.23099	0.629399	1.01507	0.824597	3147.21	25.2765	3189.1	11.9593	3216.23	10.9948	3216.23	10.9948	97.8541
AV-3	part 2	75	294.165	324977	2.69342	3.86215	0.718448	22.7036	1.12056	0.640646	0.859909	0.767396	3191.55	21.6459	3214.32	10.8983	3229.24	11.3369	3229.24	11.3369	98.833
AV-3	part 2	77	229.667	389358	1.48593	3.86944	0.706474	22.2699	0.957722	0.629581	0.646587	0.67513	3147.93	16.1035	3195.57	9.3069	3226.29	11.1509	3226.29	11.1509	97.5712
AV-3	part 2	81	356.991	227603	2.90055	3.84876	0.758123	22.3853	1.13334	0.627861	0.842287	0.743189	3141.12	20.9424	3200.6	11.0161	3238.77	11.9561	3238.77	11.9561	96.9852
AV-3	part 2	82	320.07	677938	2.89484	3.8593	0.742597	22.2495	1.16365	0.625687	0.895895	0.7699	3132.51	22.2278	3194.68	11.3078	3234.64	11.7125	3234.64	11.7125	96.8426
AV-3	part 2	83	207.407	414100	3.62738	3.89421	0.952275	21.6635	1.30061	0.614807	0.885843	0.681096	3089.22	21.7418	3168.76	12.6241	3220.2	15.0323	3220.2	15.0323	95.9327
AV-3	part 2	84	240.142	182298	4.21932	3.8481	0.68783	22.4483	1.09468	0.629109	0.851506	0.777855	3146.06	21.1974	3203.33	10.6416	3240.06	10.8457	3240.06	10.8457	97.0988
AV-3	part 2	85	182.193	364369	2.18352	3.84727	0.761489	22.3352	1.01748	0.625733	0.674831	0.663235	3132.69	16.7438	3198.42	9.88894	3240.58	12.0047	3240.58	12.0047	96.6708
AV-3	part 2	86	276.376	120550	2.8749	3.84318	0.689268	22.4312	0.991452	0.627898	0.712411	0.718553	3141.27	17.7138	3202.59	9.63768	3241.9	10.869	3241.9	10.869	96.896
AV-3	part 2	87	250.182	105202	3.25741	3.82533	0.800476	22.3484	1.18577	0.622705	0.873987	0.737063	3120.67	21.6206	3199	11.5249	3249.16	12.6246	3249.16	12.6246	96.0455
AV-3	part 2	89	284.917	691275	2.98494	3.86475	0.924446	22.6568	1.57065	0.637595	1.26977	0.808439	3179.56	31.8703	3212.32	15.2751	3233.51	14.5822	3233.51	14.5822	98.3313
AV-3	part 2	91	331.775	262781	2.45616	3.85188	0.744111	22.4518	1.03918	0.630954	0.725323	0.697977	3153.36	18.0887	3203.48	10.1021	3235.69	11.7364	3235.69	11.7364	97.4556
AV-3	part 2	93	141.018	200621	1.89452	3.86407	0.67955	23.1222	1.29283	0.652107	1.09981	0.850696	3236.43	27.9846	3232.1	12.5837	3230.08	10.7226	3230.08	10.7226	100.196
AV-3	part 2	96	294.198	465913	2.53535	3.86294	0.653571	23.0029	1.11776	0.648498	0.906748	0.811223	3222.34	22.9947	3227.06	10.8771	3230.68	10.312	3230.68	10.312	99.7418
B2-11	Part 2	1	184.079	116885	2.66066	3.37658	0.643334	27.7747	0.916442	0.685017	0.652297	0.711771	3363.58	17.0947	3411.18	8.98225	3439.92	9.99493	3439.92	9.99493	97.7809
B2-11	Part 2	8	224.099	333420	2.3935	3.33682	0.76715	28.291	1.09037	0.688746	0.774822	0.710607	3377.83	20.3712	3429.23	10.6938	3460.07	11.8887	3460.07	11.8887	97.6233
B2-11	Part 2	9	114.707	213534	3.27393	3.3451	0.577621	29.0174	0.804565	0.708222	0.560054	0.696096	3451.75	14.9684	3454.11	7.89742	3456.14	8.95201	3456.14	8.95201	99.873
B2-11	Part 2	10	235.218	310410	2.51822	3.34105	0.540238	28.3611	0.762858	0.691334	0.538594	0.706021	3387.7	14.1918	3431.66	7.48225	3458.1	8.37116	3458.1	8.37116	97.9645
B2-11	Part 2	14	241.434	322529	2.09005	3.35238	0.526556	28.1306	0.725334	0.687326	0.49882	0.687711	3372.41	13.0986	3423.66	7.11221	3454.45	8.16107	3454.45	8.16107	97.6251
B2-11	Part 2	19	213.97	107746	2.46377	3.34434	0.582396	29.6066	0.815254	0.722666	0.570388	0.699645	3506.03	15.425	3473.84	8.00765	3456.01	9.02738	3456.01	9.02738	101.447
B2-11	Part 2	26	199.739	361674	1.86606	3.33693	0.578846	29.1359	0.813111	0.709027	0.571018	0.702263	3454.79	15.2715	3458.11	7.98239	3460.7	8.96859	3460.7	8.96859	99.8291
B2-11	Part 2	28	167.124	253306	1.76618	3.34177	0.610657	29.5456	0.869946	0.720696	0.619567	0.71219	3498.66	16.7284	3471.82	8.5443	3457.04	9.46415	3457.04	9.46415	101.204
B2-11	Part 2	35	207.652	178609	2.30853	3.41727	0.591184	27.8391	0.845669	0.695217	0.604626	0.714968	3402.49	15.9846	3413.45	8.28921	3420.55	9.19409	3420.55	9.19409	99.4719
B2-11	Part 2	36	251.954	84599	2.50179	3.38185	0.658533	27.0901	0.914563	0.66964	0.634063	0.693297	3304.48	16.3934	3386.72	8.95596	3436.42	10.2362	3436.42	10.2362	96.1607
B2-11	Part 2	38	246.727	104233	1.99807	3.39253	0.594752	27.4734	0.844166	0.68121	0.599007	0.709584	3349	15.6462	3400.49	8.27067	3431.63	9.2415	3431.63	9.2415	97.5921
B2-11	Part 2	41	199.215	283765	2.41422	3.34649	0.572464	28.6031	0.818521	0.699283	0.585008	0.714714	3417.93	15.5192	3439.99	8.03053	3453.54	8.87366	3453.54	8.87366	98.969
B2-11	Part 2	43	115.85	165723	2.82476	3.339	0.781876	29.1161	1.09606	0.710289	0.768028	0.700715	3459.55	20.5619	3457.44	10.7601	3456.89	12.1208	3456.89	12.1208	100.077
B2-11	Part 2	48	186.368	72219.9	2.35496	3.37294	0.56424	28.9952	0.793764	0.714775	0.557925	0.702885	3476.43	14.9919	3453.36	7.7912	3440.67	8.76602	3440.67	8.76602	101.039
B2-11	Part 2	50	186.831	212611	2.84084	3.35176	0.439003	27.1007	0.613933	0.664047	0.429085	0.698912	3282.85	11.0381	3387.11	6.01201	3450.05	6.81235	3450.05	6.81235	95.1538
B2-11	Part 2	59	242.956	395642	2.2538	3.35167	0.612194	28.9845	0.8601	0.708149	0.604139	0.702405	3451.48	16.1456	3452.99	8.44224	3454.54	9.48902	3454.54	9.48902	99.9112
B2-11	Part 2	61	248.11	198411	2.08383	3.35108	0.588869	28.4068	0.811167	0.69397	0.557771	0.687616	3397.74	14.7302	3433.24	7.95653	3454.69	9.12857	3454.69	9.12857	98.3517
B2-11	Part 2	66	342.785	98803.9	1.78639	3.37675	0.624754	28.2629	0.879106	0.695392	0.61845	0.703498	3403.15	16.3525	3428.26	8.62146	3443.63	9.69805	3443.63	9.69805	98.8245
B2-11	Part 2	70	231.655	167404	2.55961	3.42024	0.645473	28.8477	0.895737	0.718448	0.621041	0.693329	3490.23	16.7378	3448.35	8.79066	3424.78	10.0341	3424.78	10.0341	101.911
B2-11	Part 2	79	238.807	132259	2.26894	3.33911	0.549926	29.0344	0.765514	0.705979	0.532301	0.695351	3443.28	14.2002	3454.68	7.51424	3461.96	8.52271	3461.96	8.52271	99.4605
B2-11	Part 2	86	276.996	93744.5	2.35889	3.35446	0.658497	28.7673	0.907401	0.703883	0.624295	0.688004	3435.36	16.6253	3445.61	8.9043	3452.25	10.2089	3452.25	10.2089	99.5107
B2-11	Part 2	88	234.88	189966	2.05399	3.34245	0.529568	29.6373	0.760456	0.722374	0.545615	0.717484	3504.94	14.7516	3474.86	7.46964	3458.24	8.20771	3458.24	8.20771	101.35
B2-11	Part 2	91	309.029	90741.2	2.00411	3.35157	0.544418	27.6487	0.76788	0.675131	0.541456	0.705131	3325.65	14.0676	3406.72	7.52491	3455.42	8.43821	3455.42	8.43821	96.2443
B2-11	Part 2	96	219.646	176037	2.53286	3.3529	0.607609	27.2542	0.836841	0.665876	0.575211	0.68736	3289.93	14.8217	3392.64	8.19658	3454.54	9.42096	3454.54	9.42096	95.2351
B2-11	Part 2	98	251.528	40510.6	2.25594	3.34912	0.478252	28.0504	0.648395	0.684986	0.437707	0.675062	3363.46	11.4706	3420.86	6.35714	3455.32	7.4127	3455.32	7.4127	97.3416
B2-11	Part 1	1	184.079	116885	2.66066	3.37658	0.643334	27.7747	0.916442	0.685017	0.652297	0.711771	3363.58	17.0947	3411.18	8.98225	3439.92	9.99493	3439.92	9.99493	97.7809
B2-11	Part 1	8	224.099	333420	2.3935	3.33682	0.76715	28.291	1.09037	0.688746	0.774822	0.710607	3377.83	20.3712	3429.23	10.6938	3460.07	11.8887	3460.07	11.8887	97.6233
B2-11	Part 1	9	114.707	213534	3.27393	3.3451	0.577621	29.0174	0.804565	0.708222	0.560054	0.696096	3451.75	14.9684	3454.11	7.89742	3456.14	8.95201	3456.14	8.95201	99.873
B2-11	Part 1	10	235.218	310410	2.51822	3.34105	0.540238	28.3611	0.762858	0.691334	0.538594	0.706021	3387.7	14.1918	3431.66	7.48225	3458.1	8.37116	3458.1	8.37116	97.9645
B2-11	Part 1	14	241.434	322529	2.09005	3.35238	0.526556	28.1306	0.725334	0.687326	0.49882	0.687711	3372.41	13.0986	3423.66	7.11221	3454.45	8.16107	3454.45	8.16107	97.6251
B2-11	Part 1	19	213.97	107746	2.46377	3.34434	0.582396	29.6066	0.815254	0.722666	0.570388	0.699645	3506.03	15.425	3473.84	8.00765	3456.01	9.02738	3456.01	9.02738	101.447
B2-11	Part 1	26	199.739	361674	1.86606	3.33693	0.578846	29.1359	0.813111	0.709027	0.571018	0.702263	3454.79	15.2715	3458.11	7.98239	3460.7	8.96859	3460.7	8.96859	99.8291
B2-11	Part 1	28	167.124	253306	1.76618	3.34177	0.610657	29.5456	0.869946	0.720696	0.619567	0.71219	3498.66	16.7284	3471.82	8.5443	3457.04	9.46415	3457.04	9.46415	101.204
B2-11	Part 1	35	207.652	178609	2.30853	3.41727	0.591184	27.8391	0.845669	0.695217	0.604626	0.714968	3402.49	15.9846	3413.45	8.28921	3420.55	9.19409	3420.55	9.19409	99.4719
B2-11	Part 1	36	251.954	84599	2.50179	3.38185	0.658533	27.0901	0.914563	0.66964	0.634063	0.693297	3304.48	16.3934	3386.72	8.95596	3436.42	10.2362	3436.42	10.2362	96.1607
B2-11	Part 1	38	246.727	104233	1.99807	3.39253	0.594752	27.4734	0.844166	0.68121	0.599007	0.709584	3349	15.6462	3400.49	8.27067	3431.63	9.2415	3431.63	9.2415	97.5921
B2-11	Part 1	41	199.215	283765	2.41422	3.34649	0.572464	28.6031	0.818521	0.699283	0.585008	0.714714	3417.93	15.5192	3439.99	8.03053	3453.54	8.87366	3453.54	8.87366	98.969
B2-11	Part 1	43	115.85	165723	2.82476	3.339	0.781876	29.1161	1.09606	0.710289	0.768028	0.700715	3459.55	20.5619	3457.44	10.7601	3456.89	12.1208	3456.89	12.1208	100.077
B2-11	Part 1	48	186.368	72219.9	2.35496	3.37294	0.56424	28.9952	0.793764	0.714775	0.557925	0.702885	3476.43	14.9919	3453.36	7.7912	3440.67	8.76602	3440.67	8.76602	101.039
B2-11	Part 1	50	186.831	212611	2.84084	3.35176	0.439003	27.1007	0.613933	0.664047	0.429085	0.698912	3282.85	11.0381	3387.11	6.01201	3450.05	6.81235	3450.05	6.81235	95.1538
B2-11	Part 1	59	242.956	395642	2.2538	3.35167	0.612194	28.9845	0.8601	0.708149	0.604139	0.702405	3451.48	16.1456	3452.99	8.44224	3454.54	9.48902	3454.54	9.48902	99.9112
B2-11	Part 1	61	248.11	198411	2.08383	3.35108	0.588869	28.4068	0.811167	0.69397	0.557771	0.687616	3397.74	14.7302	3433.24	7.95653	3454.69	9.12857	3454.69	9.12857	98.3517
B2-11	Part 1	66	342.785	98803.9	1.78639	3.37675	0.624754	28.2629	0.879106	0.695392	0.61845	0.703498	3403.15	16.3525	3428.26	8.62146	3443.63	9.69805	3443.63	9.69805	98.8245
B2-11	Part 1	70	231.655	167404	2.55961	3.42024	0.645473	28.8477	0.895737	0.718448	0.621041	0.693329	3490.23	16.7378	3448.35	8.79066	3424.78	10.0341	3424.78	10.0341	101.911
B2-11	Part 1	79	238.807	132259	2.26894	3.33911	0.549926	29.0344	0.765514	0.705979	0.532301	0.695351	3443.28	14.2002	3454.68	7.51424	3461.96	8.52271	3461.96	8.52271	99.4605
B2-11	Part 1	86	276.996	93744.5	2.35889	3.35446	0.658497	28.7673	0.907401	0.703883	0.624295	0.688004	3435.36	16.6253	3445.61	8.9043	3452.25	10.2089	3452.25	10.2089	99.5107
B2-11	Part 1	88	234.88	189966	2.05399	3.34245	0.529568	29.6373	0.760456	0.722374	0.545615	0.717484	3504.94	14.7516	3474.86	7.46964	3458.24	8.20771	3458.24	8.20771	101.35
B2-11	Part 1	91	309.029	90741.2	2.00411	3.35157	0.544418	27.6487	0.76788	0.675131	0.541456	0.705131	3325.65	14.0676	3406.72	7.52491	3455.42	8.43821	3455.42	8.43821	96.2443
B2-11	Part 1	96	219.646	176037	2.53286	3.3529	0.607609	27.2542	0.836841	0.665876	0.575211	0.68736	3289.93	14.8217	3392.64	8.19658	3454.54	9.42096	3454.54	9.42096	95.2351
B2-11	Part 1	98	251.528	40510.6	2.25594	3.34912	0.478252	28.0504	0.648395	0.684986	0.437707	0.675062	3363.46	11.4706	3420.86	6.35714	3455.32	7.4127	3455.32	7.4127	97.3416
B2-18	part 1	1	186.768	324516	1.98926	3.33824	0.834827	28.7856	1.15613	0.69757	0.799794	0.691783	3411.43	21.1864	3446.23	11.3455	3467.19	12.9319	3467.19	12.9319	98.3917
B2-18	part 1	2	125.512	339853	2.20058	3.34327	0.762727	29.3864	1.02484	0.713198	0.684501	0.667909	3470.5	18.3694	3466.51	10.0639	3464.87	11.8161	3464.87	11.8161	100.163
B2-18	part 1	3	208.063	459994	2.16927	3.3392	0.700769	28.2952	0.943609	0.687287	0.631913	0.669677	3372.26	16.593	3429.38	9.25444	3463.58	10.8567	3463.58	10.8567	97.3636
B2-18	part 1	4	159.367	395564	1.26075	3.37936	0.840917	28.7888	1.18858	0.707693	0.839951	0.706683	3449.76	22.4393	3446.34	11.664	3445.03	13.0524	3445.03	13.0524	100.137
B2-18	part 1	5	179.272	376828	1.44647	3.3811	0.763303	28.0094	1.01281	0.688892	0.665687	0.65727	3378.39	17.5041	3419.42	9.92967	3444.22	11.8479	3444.22	11.8479	98.0885
B2-18	part 1	7	140.946	331331	1.53457	3.39909	0.710971	27.1599	0.999529	0.671563	0.702488	0.702819	3311.9	18.1938	3389.25	9.78895	3435.96	11.0435	3435.96	11.0435	96.3894
B2-18	part 1	10	176.944	434184	1.0784	3.14294	0.773449	31.462	1.02179	0.71879	0.6677	0.653461	3491.51	18.0003	3533.6	10.0558	3558.21	11.901	3558.21	11.901	98.1253
B2-18	part 1	11	185.905	238657	1.67518	3.22736	0.792328	29.5981	1.32264	0.693628	1.05904	0.8007	3396.44	27.9602	3473.56	12.9916	3519.01	12.2259	3519.01	12.2259	96.5171
B2-18	part 1	12	182.7	351981	1.48549	3.34358	0.60353	28.1815	0.853618	0.684257	0.60363	0.707143	3360.67	15.8089	3425.43	8.37066	3464.18	9.34951	3464.18	9.34951	97.0119
B2-18	part 1	13	167.952	372149	0.910871	3.38025	0.717653	27.6805	0.999885	0.679459	0.696223	0.696304	3342.28	18.1577	3407.85	9.79897	3447.29	11.1368	3447.29	11.1368	96.9539
B2-18	part 1	14	207.009	422754	2.0522	3.34182	0.812733	27.6686	1.22476	0.673081	0.916213	0.748077	3317.76	23.7611	3407.42	12.0028	3461.25	12.5946	3461.25	12.5946	95.8543
B2-18	part 1	16	118.056	300223	1.92461	3.19875	0.624532	30.4025	0.854669	0.707944	0.58343	0.682638	3450.7	15.5895	3499.91	8.40201	3528.85	9.62961	3528.85	9.62961	97.7853
B2-18	part 1	17	258.386	323762	1.81352	3.38128	1.10845	27.2098	1.65565	0.669754	1.22982	0.742803	3304.92	31.7999	3391.04	16.2166	3443	17.2074	3443	17.2074	95.9897
B2-18	part 1	18	192.249	194035	1.34052	3.37801	0.739591	25.4189	1.31897	0.625114	1.09209	0.827985	3130.24	27.0803	3324.45	12.8863	3444.39	11.4799	3444.39	11.4799	90.8793
B2-18	part 1	19	241.348	120493	1.4249	3.35688	1.01819	26.0439	1.60866	0.63698	1.24518	0.774047	3177.13	31.2345	3348.19	15.7313	3452.9	15.7932	3452.9	15.7932	92.0135
B2-18	part 1	22	227.786	441850	0.983246	3.37972	0.672515	28.1314	1.20668	0.692574	1.00189	0.830288	3392.43	26.4278	3423.68	11.8324	3442.69	10.44	3442.69	10.44	98.54
B2-18	part 1	23	163.612	62551.1	1.69506	3.34418	0.785784	27.7438	1.14347	0.675874	0.829096	0.725072	3328.51	21.555	3410.08	11.2071	3459.04	12.2043	3459.04	12.2043	96.2265
B2-18	part 1	25	239.343	579451	2.4286	3.33953	0.714151	28.2817	0.997001	0.687698	0.695697	0.69779	3373.83	18.2744	3428.91	9.77796	3461.91	11.0653	3461.91	11.0653	97.4557
B2-18	part 1	28	128.641	213039	1.51537	3.3983	0.747772	25.8301	1.09673	0.636976	0.802182	0.731434	3177.12	20.1221	3340.13	10.7213	3440.11	11.6119	3440.11	11.6119	92.3551
B2-18	part 1	32	159.239	48975.4	1.13979	3.36158	0.753123	25.989	1.30725	0.634306	1.06746	0.816571	3166.6	26.7079	3346.12	12.7825	3456.15	11.6968	3456.15	11.6968	91.6222
B2-18	part 1	33	195.973	349858	1.20406	3.39332	0.629819	28.2184	0.883082	0.698958	0.618971	0.700921	3416.7	16.4156	3426.71	8.66	3433.24	9.78458	3433.24	9.78458	99.518
B2-18	part 1	34	246.186	308992	2.20938	3.33945	0.638681	27.5842	0.894876	0.672411	0.626773	0.700403	3315.17	16.2451	3404.43	8.76875	3458.06	9.89816	3458.06	9.89816	95.8681
B2-18	part 1	37	177.155	369933	0.733117	3.35891	0.706121	28.2572	1.00042	0.692817	0.708676	0.708375	3393.35	18.6972	3428.06	9.81125	3449.07	10.9564	3449.07	10.9564	98.3845
B2-18	part 1	38	191.572	466291	1.86705	3.34781	0.80674	28.8763	1.11482	0.705644	0.769396	0.690155	3442.02	20.5195	3449.32	10.9412	3454.24	12.5071	3454.24	12.5071	99.6461
B2-18	part 1	42	206.074	2.21223e+07	1.04098	3.3766	0.623064	28.0206	0.807075	0.690727	0.512992	0.635619	3385.39	13.5102	3419.82	7.91268	3440.72	9.67362	3440.72	9.67362	98.3921
B2-18	part 1	43	191.504	1.5781e+07	2.07343	3.35846	0.739743	28.0554	1.05922	0.687869	0.758113	0.715725	3374.48	19.9169	3421.03	10.3854	3449.08	11.4779	3449.08	11.4779	97.8373
B2-18	part 1	47	216.144	494573	1.821	3.39696	0.773536	27.4965	1.06574	0.682935	0.733104	0.68788	3355.61	19.1777	3401.31	10.442	3429.01	12.0209	3429.01	12.0209	97.8596
B2-18	part 1	48	276.684	354804	1.88457	3.38125	0.700771	28.1245	1.02729	0.697551	0.751154	0.731201	3411.36	19.8976	3423.45	10.0731	3431.2	10.8882	3431.2	10.8882	99.4218
B2-18	part 1	49	237.122	585241	1.04196	3.34569	0.756493	28.4534	1.06003	0.698258	0.742543	0.700489	3414.04	19.6813	3434.85	10.3983	3447.68	11.7393	3447.68	11.7393	99.0244
B2-18	part 1	50	169.769	349631	1.89144	3.36132	0.847679	27.7014	1.23075	0.680007	0.892284	0.724992	3344.39	23.2823	3408.59	12.062	3447.21	13.1547	3447.21	13.1547	97.0171
B2-18	part 1	51	166.636	120290	1.34985	3.33197	0.772103	27.2137	1.23101	0.665243	0.958634	0.778739	3287.48	24.6874	3391.18	12.057	3453.71	11.9727	3453.71	11.9727	95.1871
B2-18	part 1	52	236.618	525255	2.36725	3.34017	0.678882	28.7245	0.933966	0.703753	0.641402	0.686751	3434.86	17.079	3444.15	9.16454	3450.22	10.5328	3450.22	10.5328	99.5548
B2-18	part 1	53	259.464	147428	1.60209	3.80251	0.650363	21.5792	1.07052	0.598465	0.850198	0.794194	3023.65	20.5199	3164.98	10.3888	3256.53	10.2419	3256.53	10.2419	92.8488
B2-18	part 1	62	178.347	447633	0.962571	3.38039	0.836107	28.2106	1.19279	0.691484	0.850663	0.713174	3388.27	22.4177	3426.44	11.6972	3449.51	12.967	3449.51	12.967	98.2249
B2-18	part 1	67	96.5211	230623	0.807357	3.35555	0.783851	29.3497	1.07698	0.714163	0.738536	0.685747	3474.13	19.8352	3465.28	10.5755	3460.84	12.1469	3460.84	12.1469	100.384
B2-18	part 1	68	177.49	429578	1.97503	3.34072	0.672918	28.8026	1.05175	0.697709	0.808307	0.768533	3411.96	21.4145	3446.81	10.3213	3467.79	10.4221	3467.79	10.4221	98.3898
B2-18	part 1	69	230.872	465790	1.94477	3.34835	0.838508	28.5468	1.14726	0.694344	0.783009	0.682503	3399.17	20.6852	3438.06	11.2553	3461.47	12.9937	3461.47	12.9937	98.2
B2-18	part 1	74	287.425	561842	1.67297	3.35176	0.900635	28.7602	1.25633	0.705875	0.875913	0.697198	3442.89	23.3648	3445.37	12.3286	3447.48	13.9762	3447.48	13.9762	99.8668
B2-18	part 1	75	193.591	257521	1.66338	3.41036	0.834671	26.0411	1.25957	0.650363	0.943272	0.748883	3229.62	23.9626	3348.08	12.3171	3420.44	12.9803	3420.44	12.9803	94.4213
B2-18	part 1	77	215.773	258595	1.1007	3.36722	0.667133	25.9654	1.44455	0.640269	1.28125	0.886956	3190.07	32.2407	3345.24	14.1247	3440.22	10.3588	3440.22	10.3588	92.7287
B2-18	part 1	78	155.711	328269	1.64323	3.38209	0.754639	28.3544	1.05607	0.702243	0.73874	0.699521	3429.15	19.6461	3431.43	10.3582	3433.43	11.7236	3433.43	11.7236	99.8754
B2-18	part 1	80	256.251	339378	1.83527	3.3435	0.680449	28.155	0.965182	0.689345	0.684503	0.709196	3380.12	18.0058	3424.51	9.46442	3451.25	10.5502	3451.25	10.5502	97.939
B2-18	part 1	81	170.898	347659	1.00451	3.38124	0.671803	28.2951	0.922484	0.700594	0.632123	0.68524	3422.9	16.7875	3429.38	9.04725	3433.83	10.4368	3433.83	10.4368	99.6817
B2-18	part 1	82	226.356	315340	1.95025	3.36507	0.671039	27.1672	1.09503	0.669458	0.865334	0.790235	3303.78	22.3693	3389.51	10.7244	3441.26	10.4181	3441.26	10.4181	96.0052
B2-18	part 1	84	193.542	453043	1.38282	3.34433	0.809711	29.0456	1.11164	0.710594	0.761644	0.685151	3460.7	20.3961	3455.06	10.9122	3452.46	12.5547	3452.46	12.5547	100.238
B2-18	part 1	85	262.055	616060	2.59003	3.38318	0.713092	28.494	1.11114	0.705185	0.852126	0.76689	3440.28	22.7172	3436.25	10.9003	3434.57	11.0769	3434.57	11.0769	100.166
B2-18	part 1	86	85.6934	173882	1.41961	3.36268	0.912177	28.4037	1.20626	0.698786	0.78926	0.654304	3416.04	20.9288	3433.13	11.8321	3443.79	14.1597	3443.79	14.1597	99.1943
B2-18	part 1	87	249.84	413196	1.43673	3.34787	0.67139	27.626	0.946329	0.676583	0.666909	0.704732	3331.23	17.3493	3405.91	9.27345	3450.81	10.416	3450.81	10.416	96.5347
B2-18	part 1	88	168.107	329226	1.06123	3.37782	0.676732	28.4967	1.03635	0.704166	0.784828	0.757302	3436.43	20.9053	3436.34	10.1665	3436.96	10.511	3436.96	10.511	99.9846
B2-18	part 1	89	215.666	258804	1.45947	3.34309	0.729676	27.5469	1.19109	0.673715	0.941374	0.790344	3320.2	24.4274	3403.11	11.671	3452.95	11.3134	3452.95	11.3134	96.1553
B2-18	part 1	91	249.778	216922	1.74589	3.36884	0.717454	26.5064	1.1201	0.65012	0.860146	0.76792	3228.67	21.8459	3365.4	10.9602	3448.53	11.1328	3448.53	11.1328	93.6247
B2-18	part 1	94	287.412	290219	1.88945	3.45788	0.835485	26.4695	1.62175	0.665601	1.38995	0.857065	3288.87	35.8067	3364.04	15.8688	3409.8	12.9979	3409.8	12.9979	96.4535
B2-18	part 1	97	138.283	298786	1.77688	3.38017	0.685876	26.4847	0.951941	0.651013	0.660102	0.693428	3232.16	16.7791	3364.6	9.31443	3445.13	10.6456	3445.13	10.6456	93.8183
B2-18	part 1	99	249.166	449907	2.18628	3.34172	0.673569	28.2407	1.00021	0.686251	0.739381	0.739227	3368.3	19.3976	3427.49	9.80892	3462.93	10.4358	3462.93	10.4358	97.2674
B2-18	part 2	2	211.064	265750	1.86522	3.33774	0.65609	28.4556	1.04691	0.694141	0.815812	0.779256	3398.4	21.548	3434.92	10.2696	3456.97	10.1685	3456.97	10.1685	98.3057
B2-18	part 2	3	127.804	382513	2.28409	3.33314	0.66874	29.2431	0.868161	0.714241	0.553607	0.637678	3474.43	14.8694	3461.71	8.52388	3455.03	10.3659	3455.03	10.3659	100.561
B2-18	part 2	7	265.529	231354	2.09942	3.34982	0.78104	25.1923	1.56855	0.618423	1.36021	0.867174	3103.64	33.5059	3315.7	15.3199	3447.19	12.1221	3447.19	12.1221	90.0339
B2-18	part 2	8	186.588	379281	0.780121	3.84035	0.970716	23.1907	1.35957	0.652624	0.951899	0.700149	3238.45	24.2326	3234.98	13.2349	3233.5	15.3122	3233.5	15.3122	100.153
B2-18	part 2	9	212.257	332166	2.1756	3.33833	0.684813	28.8945	1.07686	0.710206	0.831032	0.771717	3459.23	22.2471	3449.94	10.5689	3445.22	10.6292	3445.22	10.6292	100.407
B2-18	part 2	10	259.173	127532	1.7326	3.37112	0.71764	25.1919	1.48141	0.625388	1.29586	0.874751	3131.32	32.142	3315.68	14.4686	3429.77	11.1547	3429.77	11.1547	91.2982
B2-18	part 2	11	180.476	211393	1.90511	3.33232	0.826872	29.4352	1.18708	0.72258	0.851707	0.717483	3505.71	23.0312	3468.14	11.6579	3447.18	12.8319	3447.18	12.8319	101.698
B2-18	part 2	13	259.361	318124	2.25687	3.38618	0.696705	26.975	1.02763	0.677258	0.755393	0.735081	3333.83	19.6629	3382.56	10.0617	3412.22	10.8411	3412.22	10.8411	97.7026
B2-18	part 2	14	263.122	139132	2.19173	3.36583	0.678366	26.5738	1.18391	0.661529	0.970127	0.819424	3273.09	24.8995	3367.89	11.5858	3425.46	10.5484	3425.46	10.5484	95.552
B2-18	part 2	15	190.667	447909	1.69547	3.33892	0.695606	28.993	0.929143	0.71586	0.615976	0.662951	3480.51	16.5665	3453.28	9.12005	3438.19	10.8021	3438.19	10.8021	101.231
B2-18	part 2	16	227.609	353831	2.01573	3.34995	0.839439	27.1852	1.21092	0.673455	0.872693	0.720686	3319.2	22.64	3390.16	11.8598	3433.04	13.0416	3433.04	13.0416	96.684
B2-18	part 2	17	126.976	221998	2.12038	3.37013	0.758028	27.26	1.1197	0.679415	0.824002	0.735915	3342.11	21.4895	3392.85	10.9673	3423.61	11.7861	3423.61	11.7861	97.6195
B2-18	part 2	18	272.391	163785	1.85128	3.36591	0.617776	25.3875	1.07592	0.63199	0.880822	0.818669	3157.45	21.9888	3323.24	10.5111	3425.47	9.60416	3425.47	9.60416	92.1757
B2-18	part 2	20	183.107	331591	1.27072	3.3389	0.782901	28.0129	1.10772	0.691722	0.783628	0.707428	3389.18	20.6553	3419.55	10.8603	3438.06	12.158	3438.06	12.158	98.5784
B2-18	part 2	22	202.466	436662	1.95299	3.33773	0.803249	28.674	1.089	0.707781	0.735297	0.675206	3450.09	19.6449	3442.42	10.6852	3438.64	12.4736	3438.64	12.4736	100.333
B2-18	part 2	26	209.664	392920	2.09882	3.36294	0.733726	27.8997	1.04949	0.693876	0.750369	0.714982	3397.38	19.815	3415.58	10.288	3426.93	11.4042	3426.93	11.4042	99.1377
B2-18	part 2	29	268.019	227177	1.64082	3.3193	0.646015	25.9627	1.6109	0.632472	1.47568	0.916055	3159.36	36.8561	3345.13	15.7515	3459.07	10.0114	3459.07	10.0114	91.3354
B2-18	part 2	36	168.162	317033	1.04367	3.34467	0.828569	30.1164	1.19719	0.739231	0.864122	0.721792	3567.72	23.6765	3490.62	11.7659	3447.33	12.8582	3447.33	12.8582	103.492
B2-18	part 2	38	210.667	228482	2.14762	3.37444	0.871588	25.9918	1.54606	0.643698	1.27696	0.825943	3203.54	32.2374	3346.23	15.118	3433.5	13.54	3433.5	13.54	93.3024
B2-18	part 2	39	131.567	337051	1.65305	3.37683	0.706177	29.0136	0.986439	0.717899	0.688716	0.698184	3488.17	18.5535	3453.98	9.68271	3434.88	10.9695	3434.88	10.9695	101.551
B2-18	part 2	40	103.135	241482	1.66798	3.33744	0.801124	29.3855	1.02843	0.718647	0.644844	0.627018	3490.97	17.3821	3466.48	10.0992	3453.03	12.4213	3453.03	12.4213	101.099
B2-18	part 2	41	211.219	382246	1.42598	3.33703	0.654866	28.4799	1.02575	0.696378	0.789494	0.769674	3406.9	20.8925	3435.76	10.0623	3453.3	10.1518	3453.3	10.1518	98.6564
B2-18	part 2	43	211.293	333152	1.47498	3.34598	0.671632	27.9435	1.15196	0.685106	0.935896	0.812439	3363.92	24.5289	3417.12	11.2931	3449.12	10.4212	3449.12	10.4212	97.5297
B2-18	part 2	47	208.234	211951	1.35791	3.33945	0.661185	27.2119	1.40974	0.663299	1.24505	0.88318	3279.96	32.0072	3391.12	13.8077	3458.14	10.247	3458.14	10.247	94.8473
B2-18	part 2	51	210.648	389061	1.1392	3.35148	0.745911	27.818	1.10536	0.680801	0.815716	0.737967	3347.43	21.2992	3412.7	10.8345	3451.92	11.5655	3451.92	11.5655	96.9731
B2-18	part 2	52	143.676	314624	1.75902	3.34787	0.723281	28.9669	0.980294	0.708169	0.661632	0.674932	3451.55	17.6824	3452.4	9.62187	3453.56	11.2137	3453.56	11.2137	99.9418
B2-18	part 2	54	249.77	207773	1.75998	3.37472	0.890844	27.7077	1.47034	0.682832	1.16973	0.795553	3355.22	30.5971	3408.81	14.4105	3441.13	13.831	3441.13	13.831	97.5034
B2-18	part 2	60	248.011	252604	2.03738	3.34403	0.670775	27.6638	1.00326	0.67393	0.746006	0.743584	3321.03	19.3615	3407.25	9.83182	3459.03	10.3954	3459.03	10.3954	96.0104
B2-18	part 2	63	169.374	395105	1.03234	3.37829	0.728464	28.5968	1.01844	0.70295	0.711723	0.698836	3431.83	18.9388	3439.78	9.99201	3445.08	11.3065	3445.08	11.3065	99.6152
B2-18	part 2	64	234.091	135125	1.58583	3.35247	0.663181	26.6083	1.27343	0.648369	1.08692	0.853532	3221.83	27.5604	3369.16	12.4625	3458.66	10.2823	3458.66	10.2823	93.1526
B2-18	part 2	65	293.658	297794	1.12181	3.38443	0.802183	27.2155	1.61356	0.669397	1.4	0.867649	3303.54	36.1889	3391.25	15.8044	3444.15	12.452	3444.15	12.452	95.9174
B2-18	part 2	70	197.906	334637	1.62876	3.35931	0.71023	27.3629	1.11442	0.667327	0.858773	0.770598	3295.55	22.1573	3396.54	10.9171	3457.34	11.008	3457.34	11.008	95.3203
B2-18	part 2	71	283.139	581986	1.4573	3.73311	0.680422	23.5834	0.982298	0.639129	0.708456	0.721223	3185.59	17.8077	3251.33	9.56864	3292.8	10.6836	3292.8	10.6836	96.7441
B2-18	part 2	73	207.226	416715	2.21364	3.33663	0.791774	28.9843	1.19821	0.703591	0.89932	0.750552	3434.25	23.9436	3452.99	11.7612	3464.54	12.2668	3464.54	12.2668	99.1259
B2-18	part 2	74	188.755	156258	0.840072	3.37005	0.795648	26.5585	1.18506	0.651251	0.878179	0.741044	3233.09	22.3274	3367.32	11.5967	3448.88	12.3466	3448.88	12.3466	93.7433
B2-18	part 2	75	229.861	189806	1.84603	3.37765	0.701232	26.9911	1.20053	0.663327	0.974427	0.811667	3280.06	25.0507	3383.14	11.755	3445.44	10.8837	3445.44	10.8837	95.2
B2-18	part 2	76	252.595	313726	1.50872	3.34696	0.637146	28.1833	1.46325	0.686282	1.31723	0.900213	3368.42	34.5587	3425.49	14.3494	3459.72	9.87319	3459.72	9.87319	97.3611
B2-18	part 2	77	236.862	490236	1.9214	3.33813	0.673179	29.3765	0.980895	0.713423	0.71342	0.727316	3471.35	19.1491	3466.18	9.63225	3463.86	10.4289	3463.86	10.4289	100.216
B2-18	part 2	78	219.257	191818	1.10774	3.36522	0.711164	26.812	1.13536	0.654132	0.884974	0.779467	3244.33	22.5603	3376.62	11.1142	3456.77	11.0237	3456.77	11.0237	93.8545
B2-18	part 2	79	200.562	464618	2.13423	3.33837	0.684998	29.7052	0.999092	0.717337	0.727273	0.727934	3486.06	19.5832	3477.11	9.81453	3472.62	10.6123	3472.62	10.6123	100.387
B2-18	part 2	81	131.202	307382	1.55675	3.37213	0.718654	28.6602	0.958296	0.699126	0.633873	0.661459	3417.34	16.8132	3441.95	9.40258	3456.98	11.1394	3456.98	11.1394	98.8532
B2-18	part 2	82	231.333	56833.5	0.994363	3.36622	0.695988	27.0602	1.25338	0.65926	1.04121	0.830719	3264.28	26.6687	3385.65	12.2737	3458.95	10.813	3458.95	10.813	94.3721
B2-18	part 2	84	248.286	441470	1.79291	3.35079	0.784231	29.2216	1.09569	0.710104	0.765176	0.698349	3458.85	20.4824	3460.99	10.7577	3462.89	12.1512	3462.89	12.1512	99.8834
B2-18	part 2	85	138.831	379313	1.1095	3.37853	0.834661	28.4862	1.18497	0.697973	0.841089	0.709801	3412.96	22.2879	3435.98	11.6244	3450.09	12.9441	3450.09	12.9441	98.9237
B2-18	part 2	86	193.209	421152	1.38878	3.34466	0.632387	29.2651	0.94275	0.709863	0.699171	0.74163	3457.94	18.7118	3462.45	9.25649	3465.72	9.79554	3465.72	9.79554	99.7755
B2-18	part 2	88	187.264	358945	1.79095	3.32962	0.68044	28.0832	1.00309	0.678442	0.736978	0.73471	3338.38	19.2035	3422	9.83528	3472	10.5362	3472	10.5362	96.1515
B2-19	part 1	4	267.354	145692	1.12032	3.32523	0.62736	23.5772	2.73445	0.571149	2.66147	0.97331	2912.53	62.3713	3251.07	26.6415	3467.74	9.71881	3467.74	9.71881	83.9893
B2-19	part 1	5	348.356	644834	1.1333	3.36341	0.652266	28.9162	1.09229	0.708398	0.876149	0.802122	3452.41	23.42	3450.68	10.7206	3450.34	10.1197	3450.34	10.1197	100.06
B2-19	part 1	6	259.866	245618	0.276834	3.38415	0.742317	23.6846	1.69697	0.583864	1.52599	0.899244	2964.49	36.2633	3255.5	16.5341	3440.66	11.5255	3440.66	11.5255	86.1606
B2-19	part 1	10	320.514	293183	0.912149	3.54234	0.887722	26.7158	1.10484	0.688268	0.657721	0.595308	3376.01	17.2853	3373.11	10.814	3372.06	13.8539	3372.06	13.8539	100.117
B2-19	part 1	11	249.707	314911	1.59515	3.34254	0.742449	26.8687	1.694	0.650207	1.52262	0.898832	3229.01	38.6748	3378.69	16.5849	3469.36	11.4986	3469.36	11.4986	93.0723
B2-19	part 1	15	78.1607	187653	0.99954	3.15591	0.739005	31.6598	0.99383	0.728336	0.664482	0.668608	3527.22	18.0512	3539.77	9.7825	3547.55	11.3871	3547.55	11.3871	99.4269
B2-19	part 1	16	298.482	243218	1.17291	3.37538	1.02094	23.8942	1.51455	0.587903	1.11872	0.738645	2980.92	26.7007	3264.08	14.7618	3443.63	15.848	3443.63	15.848	86.5632
B2-19	part 1	17	330.502	99897.4	0.605963	3.35811	0.655047	25.86	1.3285	0.63314	1.15539	0.869695	3162	28.8753	3341.26	12.9879	3451.28	10.1727	3451.28	10.1727	91.618
B2-19	part 1	18	364.374	75988.2	0.910824	3.3505	0.807544	22.8647	2.02443	0.558603	1.85585	0.916727	2860.85	42.878	3221.2	19.6968	3454.62	12.5385	3454.62	12.5385	82.8125
B2-19	part 1	20	174.141	476407	1.5331	3.34951	0.704852	29.3813	0.982617	0.712465	0.684614	0.696725	3467.74	18.3614	3466.34	9.64922	3466.19	10.9183	3466.19	10.9183	100.045
B2-19	part 1	25	201.628	350370	1.28146	3.35505	0.857093	27.5752	1.40316	0.676197	1.11096	0.791755	3329.75	28.8913	3404.11	13.7497	3448.85	13.2931	3448.85	13.2931	96.5468
B2-19	part 1	27	354.643	587141	1.76902	3.34337	0.773273	26.9555	2.17825	0.658675	2.03637	0.934865	3262.01	52.1308	3381.85	21.3296	3454.31	11.988	3454.31	11.988	94.4329
B2-19	part 1	29	145.874	383364	1.56409	3.35427	0.741303	29.0833	1.04303	0.713004	0.733701	0.703435	3469.77	19.6867	3456.33	10.239	3449.22	11.5026	3449.22	11.5026	100.596
B2-19	part 1	30	291.248	149070	0.983897	3.3433	0.612184	22.7088	1.32659	0.554989	1.17688	0.887141	2845.89	27.0775	3214.55	12.9026	3454.08	9.48962	3454.08	9.48962	82.3922
B2-19	part 1	31	260.232	277657	1.57825	3.35899	0.756407	25.8537	1.3567	0.634743	1.12622	0.830118	3168.32	28.1898	3341.02	13.2634	3446.98	11.7394	3446.98	11.7394	91.9157
B2-19	part 1	33	255.198	387919	1.13282	3.33954	0.776025	27.2952	1.14965	0.666315	0.84822	0.737804	3291.63	21.8651	3394.11	11.2613	3455.85	12.0294	3455.85	12.0294	95.2482
B2-19	part 1	36	347.436	582180	1.05126	3.33612	0.658543	26.5852	1.21153	0.648301	1.01692	0.839366	3221.57	25.7838	3368.31	11.8563	3457.48	10.2061	3457.48	10.2061	93.1767
B2-19	part 1	39	179.951	466085	1.86871	3.34525	0.757232	29.4659	0.993387	0.713768	0.642942	0.647222	3472.65	17.2622	3469.17	9.75591	3467.82	11.729	3467.82	11.729	100.139
B2-19	part 1	42	304.953	332703	0.503153	3.33996	0.707346	22.5381	1.70596	0.545107	1.5524	0.909988	2804.79	35.3062	3207.21	16.5876	3470.22	10.9539	3470.22	10.9539	80.8246
B2-19	part 1	43	310.552	729894	1.69324	3.35019	0.695974	28.31	0.986382	0.686763	0.698974	0.708624	3370.26	18.3456	3429.89	9.67414	3465.57	10.7809	3465.57	10.7809	97.2497
B2-19	part 1	47	234.436	373059	1.95921	3.35278	0.659477	25.9465	1.03456	0.62909	0.797112	0.770487	3145.99	19.843	3344.52	10.1152	3466.4	10.2148	3466.4	10.2148	90.7565
B2-19	part 1	49	320.483	670522	0.925778	3.3624	0.730725	28.7458	1.25025	0.697268	1.01446	0.81141	3410.28	26.8662	3444.88	12.2686	3465.72	11.3196	3465.72	11.3196	98.4004
B2-19	part 1	50	256.56	187122	1.62691	3.34622	0.834206	26.6754	1.96834	0.64482	1.7828	0.90574	3207.93	45.0556	3371.62	19.2663	3471.06	12.9192	3471.06	12.9192	92.4193
B2-19	part 1	56	344.705	432415	1.65232	3.38273	0.691215	25.5405	1.2408	0.626677	1.03044	0.83046	3136.43	25.5908	3329.11	12.1248	3447.92	10.726	3447.92	10.726	90.966
B2-19	part 1	57	304.567	423426	1.12523	3.40516	1.24051	21.648	2.00411	0.534692	1.57403	0.785399	2761.19	35.3523	3168.07	19.4533	3437.65	19.2654	3437.65	19.2654	80.3221
B2-19	part 1	64	361.841	427597	1.06713	3.41082	0.730129	25.6225	1.24456	0.632054	1.00788	0.809827	3157.71	25.1621	3332.24	12.1629	3439.63	11.3371	3439.63	11.3371	91.8036
B2-19	part 1	65	236.878	603481	1.75817	3.35185	0.653618	29.1671	0.911167	0.707032	0.634821	0.696712	3447.26	16.9499	3459.16	8.94538	3466.71	10.1238	3466.71	10.1238	99.4388
B2-19	part 1	67	181.293	466772	1.61886	3.34088	0.706849	30.5977	1.01088	0.739294	0.722663	0.714882	3567.96	19.8016	3506.2	9.93982	3471.77	10.9451	3471.77	10.9451	102.771
B2-19	part 1	68	322.392	272684	1.0921	3.40027	0.632318	22.7407	1.21634	0.559947	1.03906	0.854249	2866.41	24.0434	3215.91	11.8308	3442.45	9.8162	3442.45	9.8162	83.2666
B2-19	part 1	70	257.752	391861	1.23472	3.36186	0.779027	25.6899	1.42601	0.627454	1.1944	0.837581	3139.51	29.6856	3334.81	13.9379	3455.04	12.0768	3455.04	12.0768	90.8676
B2-19	part 1	72	257.248	585765	2.00487	3.34581	0.77145	28.3111	1.04455	0.688153	0.704225	0.674193	3375.57	18.5056	3429.93	10.2446	3462.49	11.9532	3462.49	11.9532	97.4895
B2-19	part 1	78	210.241	235056	1.86493	3.33933	0.747485	23.2833	2.52539	0.569223	2.41221	0.955184	2904.63	56.4082	3238.86	24.5912	3453.55	11.5893	3453.55	11.5893	84.1056
B2-19	part 1	79	272.469	147613	0.950233	3.35438	0.717549	25.0464	1.04819	0.615136	0.763862	0.728741	3090.53	18.7541	3310.03	10.2349	3446.45	11.1395	3446.45	11.1395	89.6731
B2-19	part 1	81	333.321	92188.7	0.972771	3.33915	0.87114	22.5555	1.88331	0.551525	1.66961	0.886529	2831.51	38.26	3207.96	18.313	3453.28	13.5103	3453.28	13.5103	81.9949
B2-19	part 1	83	306.639	140270	0.781174	3.33463	0.738405	23.0516	1.41961	0.562821	1.21241	0.854045	2878.28	28.147	3229.12	13.816	3455.58	11.4471	3455.58	11.4471	83.2936
B2-19	part 1	88	244.939	605417	1.56631	3.3449	0.721652	28.7945	1.05447	0.708123	0.768837	0.729124	3451.38	20.5468	3446.54	10.3479	3444.4	11.2013	3444.4	11.2013	100.203
B2-19	part 1	92	275.273	317977	1.55708	3.33905	0.855833	27.8298	1.30127	0.679645	0.980231	0.753285	3343	25.569	3413.12	12.7553	3455.21	13.2678	3455.21	13.2678	96.7524
B2-19	part 1	94	276.192	121214	1.22838	3.33694	0.641307	24.5134	1.10199	0.598787	0.896153	0.813214	3024.95	21.6363	3289.03	10.7512	3454.86	9.94052	3454.86	9.94052	87.5562
B2-19	part 2	3	312.582	39606.6	2.0852	3.3312	0.73649	22.2285	1.6878	0.542479	1.51831	0.899575	2793.82	34.4227	3193.77	16.4013	3456.28	11.4263	3456.28	11.4263	80.8329
B2-19	part 2	5	247.267	64440.7	2.95224	3.34338	0.754071	28.0689	1.08071	0.687265	0.773879	0.716082	3372.18	20.3205	3421.5	10.5963	3451.19	11.6968	3451.19	11.6968	97.7106
B2-19	part 2	9	277.446	21308.9	2.57204	3.32891	0.667666	23.5022	1.70638	0.573404	1.5693	0.919666	2921.78	36.868	3247.97	16.6207	3456.71	10.3857	3456.71	10.3857	84.5249
B2-19	part 2	10	297.999	28165.8	2.11024	3.37052	0.653245	26.0251	0.899779	0.642635	0.614286	0.682707	3199.36	15.4922	3347.48	8.79836	3438.06	10.2098	3438.06	10.2098	93.0573
B2-19	part 2	11	289.578	28621.7	1.97381	3.34754	0.664237	22.5504	3.37638	0.550487	3.30943	0.98017	2827.2	75.7478	3207.74	32.8389	3455.85	10.3703	3455.85	10.3703	81.809
B2-19	part 2	12	385.404	17052.1	2.13315	3.42485	0.643155	22.0612	1.16949	0.55212	0.975997	0.834548	2833.98	22.3808	3186.42	11.3604	3417.19	10.0218	3417.19	10.0218	82.9333
B2-19	part 2	13	258.273	34209.9	2.854	3.33443	0.701799	22.2971	1.08153	0.5427	0.820756	0.758882	2794.74	18.6128	3196.76	10.5107	3460.43	10.9139	3460.43	10.9139	80.7628
B2-19	part 2	14	269.313	42084.4	2.37832	3.35232	0.822963	24.9715	1.82848	0.616742	1.63222	0.892666	3096.94	40.1388	3307.1	17.853	3437.75	12.7984	3437.75	12.7984	90.0864
B2-19	part 2	17	329.521	35141.9	1.56183	3.33834	0.771157	23.9711	1.54102	0.589664	1.33307	0.865063	2988.06	31.8768	3267.22	15.0217	3443.98	11.9997	3443.98	11.9997	86.7617
B2-19	part 2	18	288.577	11386.9	1.01741	3.32684	0.722475	24.2683	1.24447	0.596117	1.01285	0.813877	3014.18	24.3855	3279.23	12.1367	3446.21	11.2219	3446.21	11.2219	87.4635
B2-19	part 2	19	267.377	48672.7	1.73263	3.34166	0.664884	25.2838	1.85532	0.6224	1.73084	0.93291	3119.46	42.805	3319.24	18.1238	3442.87	10.3714	3442.87	10.3714	90.6065
B2-19	part 2	20	341.307	64167.2	1.97652	3.34103	0.723168	23.3321	1.99355	0.574156	1.85762	0.931815	2924.86	43.6781	3240.89	19.4126	3443.41	11.2311	3443.41	11.2311	84.9409
B2-19	part 2	21	325.756	52627.7	2.9108	3.36071	0.592708	27.394	0.962044	0.678145	0.756345	0.786186	3337.24	19.703	3397.65	9.42467	3434.14	9.23532	3434.14	9.23532	97.1782
B2-19	part 2	24	325.954	66985.7	1.32174	3.34197	0.642526	27.7264	0.885666	0.678703	0.608868	0.68747	3339.38	15.869	3409.47	8.68006	3451.59	9.97769	3451.59	9.97769	96.749
B2-19	part 2	25	227.451	62042.7	3.12328	3.34419	0.807978	27.6191	1.1074	0.676554	0.756921	0.683514	3331.12	19.6904	3405.67	10.8518	3450.5	12.5347	3450.5	12.5347	96.5404
B2-19	part 2	26	349.933	66366	1.5988	3.34127	0.655447	24.8383	1.58974	0.60789	1.44756	0.910563	3061.55	35.2799	3301.88	15.5184	3451.88	10.1881	3451.88	10.1881	88.6921
B2-19	part 2	27	303.936	6874.31	1.4073	3.36958	0.685682	22.089	1.75905	0.547704	1.56006	0.886877	2815.62	35.5895	3187.65	17.0891	3431.63	12.6267	3431.63	12.6267	82.049
B2-19	part 2	28	317.832	42385	2.04644	3.35081	0.681846	23.3804	1.39359	0.574895	1.21446	0.871464	2927.89	28.5787	3242.91	13.5707	3444.62	10.6087	3444.62	10.6087	84.9989
B2-19	part 2	29	276.657	6426.97	1.20882	3.33936	0.646335	24.1692	1.77087	0.594942	1.57399	0.888823	3009.43	37.849	3275.24	17.2683	3442.92	12.5972	3442.92	12.5972	87.4093
B2-19	part 2	31	342.459	25381.3	0.671015	3.32854	0.640971	22.95	2.36978	0.560867	2.27762	0.961112	2870.21	52.7599	3224.83	23.0616	3454.12	10.1445	3454.12	10.1445	83.0952
B2-19	part 2	35	342.515	35537.9	1.82968	3.34299	0.734606	24.6692	1.75979	0.603468	1.59817	0.908156	3043.8	38.7739	3295.21	17.1741	3452.61	11.4218	3452.61	11.4218	88.1592
B2-19	part 2	36	269.133	50385.7	0.748221	3.39232	0.782453	23.8679	1.61713	0.592323	1.41453	0.874719	2998.83	33.9206	3263.01	15.761	3430.29	12.1776	3430.29	12.1776	87.4222
B2-19	part 2	39	225.448	54186.8	1.83461	3.34716	0.724072	28.13	0.991683	0.686048	0.676885	0.682562	3367.53	17.7549	3423.64	9.72401	3457.31	11.2329	3457.31	11.2329	97.4032
B2-19	part 2	44	270.506	49128.7	1.39509	3.36246	0.642828	25.6445	0.994285	0.630132	0.757751	0.762106	3150.11	18.8823	3333.08	9.71719	3445.69	9.99102	3445.69	9.99102	91.4219
B2-19	part 2	47	266.949	54491.7	1.22167	3.3457	0.884305	25.215	1.56612	0.61676	1.29136	0.824561	3097.01	31.7571	3316.58	15.2967	3452.77	13.739	3452.77	13.739	89.6966
B2-19	part 2	48	280.369	69646.6	1.79236	3.34486	0.601342	27.8205	0.882999	0.679876	0.646145	0.731762	3343.88	16.8578	3412.79	8.65494	3454.17	9.32818	3454.17	9.32818	96.8071
B2-19	part 2	50	267.294	57472.6	1.51009	3.33775	0.795934	27.8275	1.236	0.676739	0.945057	0.764609	3331.84	24.5886	3413.04	12.1154	3461.72	12.3436	3461.72	12.3436	96.2479
B2-19	part 2	52	353.245	32996.6	1.50281	3.44724	0.808594	21.8308	2.34461	0.547463	2.20066	0.938605	2814.61	50.1898	3176.23	22.7678	3414.03	12.5847	3414.03	12.5847	82.4425
B2-19	part 2	56	310.114	10617.8	1.5011	3.34209	0.610917	27.5387	0.942238	0.674278	0.653801	0.69388	3322.37	16.9737	3402.81	9.23234	3451.2	10.5259	3451.2	10.5259	96.2669
B2-19	part 2	58	354.457	33004.6	1.19039	3.36043	1.01679	22.1532	1.62748	0.544271	1.26858	0.779471	2801.3	28.8224	3190.47	15.8127	3445.9	15.8229	3445.9	15.8229	81.2937
B2-19	part 2	60	237.266	54435.3	1.74149	3.33957	0.706461	28.1165	1.01908	0.68441	0.733107	0.719379	3361.26	19.2024	3423.17	9.99252	3460.27	10.9691	3460.27	10.9691	97.1386
B2-19	part 2	62	314.9	31355.2	1.07396	3.34151	0.889467	23.4018	1.62305	0.569925	1.35702	0.836097	2907.51	31.7576	3243.8	15.806	3459.51	13.7995	3459.51	13.7995	84.044
B2-19	part 2	64	343.376	32228	0.927052	3.38941	0.849785	23.178	2.60407	0.57203	2.45916	0.944351	2916.15	57.6865	3234.45	25.353	3438.88	13.3012	3438.88	13.3012	84.7994
B2-19	part 2	65	310.962	64311.9	1.31569	3.35428	0.708915	27.1203	1.32992	0.66201	1.12438	0.845443	3274.96	28.8711	3387.82	13.0243	3455.93	11.0093	3455.93	11.0093	94.7633
B2-19	part 2	66	266.254	66252.1	1.14765	3.34813	0.721489	28.9713	1.08935	0.705876	0.816063	0.749128	3442.89	21.7683	3452.55	10.6924	3458.83	11.1832	3458.83	11.1832	99.5393
B2-19	part 2	74	262.906	54161.7	1.45701	3.33987	0.689962	29.3356	0.967823	0.714541	0.678487	0.701044	3475.55	18.228	3464.81	9.50344	3459.28	10.6953	3459.28	10.6953	100.47
B2-19	part 2	75	331.436	18894.3	1.49676	3.34573	0.898225	22.4926	2.52966	0.549508	2.36257	0.933947	2823.13	54.0124	3205.25	24.5972	3454.63	14.0174	3454.63	14.0174	81.72
B2-19	part 2	78	260.911	27700.6	1.39072	3.34358	0.662409	26.7083	1.27142	0.648523	1.08044	0.849796	3222.43	27.4002	3372.83	12.4444	3464.1	10.3821	3464.1	10.3821	93.0237
B2-19	part 2	80	327.382	35539.5	0.717868	3.34202	0.837067	24.9991	1.51294	0.606586	1.25876	0.831991	3056.32	30.6374	3308.18	14.7723	3465.21	13.0036	3465.21	13.0036	88.2002
B2-19	part 2	84	358.046	14353.9	0.808516	3.37799	0.816753	27.1266	1.49385	0.667678	1.23081	0.823915	3296.9	31.7662	3388.04	14.63	3443.07	13.1417	3443.07	13.1417	95.7549
B2-19	part 2	85	393.398	31656.5	0.952673	3.37552	0.939921	23.1159	1.82895	0.567839	1.56835	0.857513	2898.94	36.6176	3231.83	17.8026	3446.13	14.6029	3446.13	14.6029	84.1216
B2-19	part 2	88	299.426	25964.1	1.27092	3.36206	0.753464	27.381	1.3059	0.670618	1.06538	0.815817	3308.26	27.569	3397.19	12.7934	3450.73	11.7105	3450.73	11.7105	95.8713
B2-19	part 2	89	283.248	54697.6	1.10365	3.39055	0.63863	25.756	0.956358	0.636075	0.709296	0.741664	3173.57	17.7767	3337.32	9.34802	3437.85	9.96201	3437.85	9.96201	92.3126
B2-19	part 2	92	319.657	33399.7	1.23876	3.33544	0.715504	25.7301	1.32394	0.620924	1.11189	0.839834	3113.59	27.4574	3336.34	12.9409	3473.67	11.133	3473.67	11.133	89.634
B2-19	part 2	94	355.883	47461.4	0.853967	3.3661	0.666578	25.9159	1.15983	0.630968	0.948508	0.817796	3153.42	23.655	3343.37	11.3397	3459.96	10.3432	3459.96	10.3432	91.1403
B2-19	part 2	96	367.007	30912.1	1.04556	3.34104	0.743166	24.1717	1.42601	0.58435	1.21421	0.851469	2966.47	28.8692	3275.34	13.9051	3470.92	11.5801	3470.92	11.5801	85.4664
B2-19	part 2	97	288.498	21111.7	1.1044	3.33269	0.713883	27.9648	1.33835	0.674663	1.12974	0.844129	3323.85	29.34	3417.86	13.121	3474.1	11.1149	3474.1	11.1149	95.6751
B2-2	part 1	10	144.59	199982	2.07328	3.36257	0.601466	27.021	0.833946	0.664839	0.577458	0.692441	3285.92	14.8656	3384.22	8.16573	3443.62	9.33938	3443.62	9.33938	95.4204
B2-2	part 1	12	237.116	152341	1.67455	3.43688	0.800638	26.8878	1.04562	0.675769	0.672167	0.642843	3328.1	17.4735	3379.39	10.2367	3410.6	12.4588	3410.6	12.4588	97.5811
B2-2	part 1	13	201.845	372188	2.19175	3.3353	0.584548	29.0036	0.826543	0.706432	0.584336	0.706964	3445	15.5942	3453.64	8.11303	3459.33	9.0578	3459.33	9.0578	99.5856
B2-2	part 1	14	192.03	212335	1.83106	3.35608	0.612387	25.463	0.853326	0.624106	0.594219	0.696356	3126.24	14.7201	3326.14	8.33729	3449.58	9.50205	3449.58	9.50205	90.6266
B2-2	part 1	15	280.971	482265	2.66421	3.34194	0.764629	28.9964	1.10421	0.70765	0.796624	0.72144	3449.59	21.281	3453.4	10.8386	3456.27	11.8524	3456.27	11.8524	99.8067
B2-2	part 1	17	213.478	314307	2.88161	3.38194	0.696306	26.4362	0.953093	0.652917	0.650746	0.682773	3239.59	16.5706	3362.81	9.32508	3437.75	10.8141	3437.75	10.8141	94.2358
B2-2	part 1	18	229.242	615598	3.00378	3.34128	0.495078	29.8259	0.718181	0.72798	0.520258	0.724411	3525.88	14.1292	3481.09	7.05584	3456.09	7.67177	3456.09	7.67177	102.019
B2-2	part 1	19	252.489	92943.4	2.32679	3.33107	0.576811	29.7608	0.798492	0.72421	0.551354	0.690494	3511.81	14.9288	3478.95	7.84434	3460.75	8.94861	3460.75	8.94861	101.475
B2-2	part 1	20	281.982	167514	1.9129	3.44199	0.551613	25.3846	0.75184	0.638201	0.510855	0.679472	3181.94	12.8294	3323.13	7.34485	3410.09	8.58492	3410.09	8.58492	93.3097
B2-2	part 1	21	212.786	146228	2.22983	3.32639	0.521424	27.5098	0.727018	0.668414	0.506616	0.696842	3299.75	13.084	3401.79	7.1232	3463.1	8.07696	3463.1	8.07696	95.2829
B2-2	part 1	22	230.271	424457	2.5268	3.34932	0.57185	28.2809	0.790819	0.691783	0.546215	0.690695	3389.42	14.3982	3428.88	7.75576	3452.7	8.87078	3452.7	8.87078	98.1673
B2-2	part 1	23	294.384	127541	1.96621	3.54225	0.678781	23.3377	0.921513	0.604406	0.623246	0.676329	3047.57	15.1354	3241.13	8.97266	3363.85	10.5997	3363.85	10.5997	90.5975
B2-2	part 1	24	210.054	313322	1.46742	3.33662	0.827387	27.5174	1.16075	0.670573	0.814104	0.70136	3308.09	21.0659	3402.06	11.3733	3458.54	12.8237	3458.54	12.8237	95.6497
B2-2	part 1	30	266.699	335629	1.99016	3.36982	0.782214	26.9352	1.09131	0.663895	0.760972	0.697303	3282.27	19.5732	3381.11	10.6847	3440.89	12.1446	3440.89	12.1446	95.3899
B2-2	part 1	32	263.546	147403	2.42481	3.3462	0.649226	26.1747	0.907631	0.64071	0.634269	0.698818	3191.81	15.967	3353.09	8.87702	3451.61	10.0715	3451.61	10.0715	92.473
B2-2	part 1	34	213.206	104408	1.29209	3.23899	0.632715	27.5163	0.892542	0.652139	0.629518	0.70531	3236.56	16.0185	3402.02	8.74512	3501.63	9.78017	3501.63	9.78017	92.4301
B2-2	part 1	35	180.937	391153	2.37911	3.34691	0.637478	27.3124	0.896718	0.668725	0.630644	0.70328	3300.95	16.2917	3394.73	8.78375	3451.22	9.88964	3451.22	9.88964	95.6458
B2-2	part 1	36	237.978	659935	1.90304	3.33396	0.645469	28.2491	0.90857	0.688959	0.639425	0.70377	3378.64	16.8145	3427.78	8.91029	3457.29	10.0034	3457.29	10.0034	97.7251
B2-2	part 1	37	258.577	373050	2.02046	3.39129	0.619502	27.411	0.86088	0.680043	0.597753	0.694351	3344.52	15.5976	3398.26	8.43376	3430.76	9.62598	3430.76	9.62598	97.4862
B2-2	part 1	39	243.291	876890	2.28343	3.34265	0.654754	28.9028	0.922759	0.706733	0.650213	0.70464	3446.13	17.3566	3450.22	9.05645	3453.27	10.15	3453.27	10.15	99.7932
B2-2	part 1	40	177.678	432976	1.72244	3.35353	0.613021	25.9472	0.866856	0.636552	0.612853	0.706984	3175.45	15.3667	3344.55	8.47547	3448.17	9.51296	3448.17	9.51296	92.091
B2-2	part 1	41	283.031	182349	2.96126	3.3658	0.548487	25.8263	0.783655	0.635975	0.559664	0.714171	3173.18	14.0252	3339.98	7.66063	3442.33	8.51541	3442.33	8.51541	92.1811
B2-2	part 1	42	217.633	456237	2.14759	3.33979	0.581629	25.519	0.81473	0.62348	0.570511	0.700246	3123.75	14.124	3328.29	7.96084	3454.54	9.01493	3454.54	9.01493	90.4245
B2-2	part 1	44	184.485	570922	2.2903	3.33363	0.601733	28.6706	0.837347	0.699324	0.582287	0.695395	3418.08	15.4475	3442.31	8.2159	3457.11	9.32532	3457.11	9.32532	98.8712
B2-2	part 1	45	189.78	142547	1.49384	3.35218	0.58733	28.7091	0.840366	0.70428	0.600951	0.715106	3436.86	16.0089	3443.62	8.2459	3448.23	9.11511	3448.23	9.11511	99.6702
B2-2	part 1	47	196.176	813206	2.07957	3.34111	0.533594	28.6659	0.750735	0.700765	0.528084	0.703423	3423.55	14.0265	3442.15	7.36601	3453.66	8.27036	3453.66	8.27036	99.1283
B2-2	part 1	48	113.345	99819.9	2.0186	3.33021	0.959795	29.4824	1.33709	0.718576	0.930799	0.696137	3490.71	25.0888	3469.72	13.1319	3458.29	14.879	3458.29	14.879	100.937
B2-2	part 1	50	239.344	842225	2.38463	3.34742	0.605209	28.6331	0.837639	0.698518	0.579095	0.691342	3415.03	15.3524	3441.02	8.2184	3456.86	9.37937	3456.86	9.37937	98.7899
B2-2	part 1	52	173.05	401355	1.65894	3.35306	0.584609	28.6481	0.812918	0.700048	0.56485	0.694843	3420.83	14.994	3441.54	7.97599	3454.28	9.06134	3454.28	9.06134	99.0316
B2-2	part 1	55	225.824	161527	1.86034	3.34521	0.512144	29.0041	0.726589	0.707217	0.515285	0.709184	3447.96	13.7604	3453.66	7.13189	3457.63	7.93737	3457.63	7.93737	99.7202
B2-2	part 1	56	210.154	586562	2.63891	3.33618	0.52724	28.0271	0.778661	0.681452	0.57299	0.735866	3349.93	14.9698	3420.04	7.63416	3462.04	8.16767	3462.04	8.16767	96.7618
B2-2	part 1	57	198.585	566737	1.69717	3.34042	0.568706	28.6899	0.805169	0.69841	0.569961	0.707878	3414.62	15.1089	3442.97	7.90034	3460.18	8.81153	3460.18	8.81153	98.6833
B2-2	part 1	58	189.981	698890	2.41852	3.33743	0.781746	29.1007	1.10858	0.707889	0.786009	0.709025	3450.5	21.0016	3456.92	10.8828	3461.32	12.1137	3461.32	12.1137	99.6874
B2-2	part 1	59	197.624	754672	1.51501	3.37403	0.668814	29.1505	0.947265	0.716875	0.670818	0.708163	3484.32	18.0563	3458.6	9.29962	3444.41	10.381	3444.41	10.381	101.159
B2-2	part 1	60	273.441	116110	1.67797	3.34358	0.55569	26.0555	0.785452	0.635136	0.5551	0.706727	3169.87	13.8996	3348.62	7.68071	3458.08	8.61071	3458.08	8.61071	91.6655
B2-2	part 1	63	178.244	766481	2.74836	3.33885	0.622114	29.4616	0.88666	0.716876	0.631769	0.712526	3484.33	17.0052	3469.02	8.70766	3460.87	9.63911	3460.87	9.63911	100.678
B2-2	part 1	64	276.199	894226	1.69987	3.3421	0.530471	29.0568	0.752198	0.707709	0.533286	0.708971	3449.82	14.2469	3455.44	7.38371	3459.37	8.219	3459.37	8.219	99.7239
B2-2	part 1	65	259.227	119868	2.43916	3.37633	0.638243	25.4465	0.906291	0.626282	0.643301	0.709817	3134.87	15.9701	3325.51	8.85459	3443.17	9.90953	3443.17	9.90953	91.0459
B2-2	part 1	66	197.049	490374	2.24465	3.34218	0.56929	27.488	0.817474	0.669538	0.586631	0.717614	3304.09	15.1657	3401.01	8.00929	3459.28	8.82137	3459.28	8.82137	95.5138
B2-2	part 1	67	137.182	408199	2.44026	3.35301	0.596953	28.6916	0.829338	0.701127	0.575699	0.694167	3424.92	15.2959	3443.03	8.13752	3454.25	9.25293	3454.25	9.25293	99.1511
B2-2	part 1	68	153.121	257843	1.48741	3.77831	0.645922	24.7289	0.942212	0.681633	0.685887	0.727953	3350.62	17.9222	3297.57	9.19548	3266.16	10.158	3266.16	10.158	102.586
B2-2	part 1	69	184.142	193171	1.95853	3.35002	0.583848	28.4857	0.807051	0.696194	0.557127	0.690324	3406.2	14.741	3435.96	7.9169	3454.03	9.05036	3454.03	9.05036	98.6154
B2-2	part 1	71	149.977	414543	2.53612	3.34462	0.594205	29.7552	0.828314	0.725981	0.577067	0.696677	3518.42	15.6471	3478.76	8.13726	3456.67	9.20891	3456.67	9.20891	101.786
B2-2	part 1	72	149.046	587726	2.83648	3.3378	0.670005	29.1789	0.936728	0.710455	0.654632	0.69885	3460.17	17.5284	3459.56	9.19646	3459.87	10.3823	3459.87	10.3823	100.009
B2-2	part 1	73	201.893	291822	2.27091	3.34848	0.651653	26.5299	0.904399	0.648573	0.627118	0.693408	3222.63	15.9044	3366.27	8.84977	3453.6	10.1017	3453.6	10.1017	93.3121
B2-2	part 1	74	200.292	815524	1.50713	3.37554	0.582199	28.5018	0.812864	0.702834	0.567264	0.697859	3431.39	15.0933	3436.51	7.97408	3440.18	9.03955	3440.18	9.03955	99.7445
B2-2	part 1	75	195.612	662421	2.15976	3.37482	0.67745	28.5822	0.954598	0.704672	0.672543	0.70453	3438.34	17.922	3439.28	9.36543	3440.49	10.5183	3440.49	10.5183	99.9375
B2-2	part 1	79	216.317	201435	2.41676	3.32649	0.726434	28.8598	1.01729	0.702041	0.712153	0.70005	3428.38	18.9359	3448.76	9.98378	3461.29	11.2562	3461.29	11.2562	99.0493
B2-2	part 1	81	103.673	418453	2.07201	3.34203	0.575491	29.0649	0.801858	0.710272	0.558369	0.696344	3459.49	14.9486	3455.71	7.87128	3454.2	8.91993	3454.2	8.91993	100.153
B2-2	part 1	82	163.186	791362	1.66333	3.33942	0.626576	29.2645	0.868286	0.714565	0.601088	0.692269	3475.65	16.149	3462.43	8.52532	3455.46	9.71168	3455.46	9.71168	100.584
B2-2	part 1	85	252.198	261626	1.7539	3.33657	0.688376	27.2917	0.971224	0.664842	0.685092	0.705391	3285.93	17.6366	3393.99	9.51335	3459.08	10.6683	3459.08	10.6683	94.9943
B2-2	part 1	88	107.483	136763	1.05971	3.40309	0.604625	28.4195	0.841437	0.706615	0.584686	0.694865	3445.69	15.6059	3433.68	8.25358	3427.35	9.40457	3427.35	9.40457	100.535
B2-2	part 1	92	192.098	922474	1.68908	3.34036	0.496661	29.2526	0.691375	0.713121	0.480961	0.695659	3470.21	12.9064	3462.03	6.78816	3457.97	7.69531	3457.97	7.69531	100.354
B2-2	part 1	95	174.128	390808	1.71181	3.35513	0.584726	26.7426	0.875972	0.654717	0.652233	0.744582	3246.61	16.6361	3374.09	8.57407	3451.36	9.0712	3451.36	9.0712	94.0675
B2-2	part 1	96	230.383	525598	1.29805	3.33672	0.692456	27.9116	0.9778	0.679571	0.690355	0.706029	3342.71	18.0065	3415.99	9.58529	3459.93	10.7303	3459.93	10.7303	96.6121
B2-2	part 1	98	258.101	241728	2.24594	3.34058	0.592274	25.6592	0.844858	0.625502	0.602454	0.713083	3131.78	14.9446	3333.64	8.25695	3458.02	9.17859	3458.02	9.17859	90.5657
B2-2	part 1	100	237.405	78127.8	2.22028	3.3289	0.516481	29.7665	0.740778	0.722938	0.530856	0.71662	3507.05	14.3591	3479.14	7.27738	3463.76	8.00271	3463.76	8.00271	101.25
B2-2	part 2	1	218.307	300031	1.40928	3.58406	0.794051	26.076	1.11378	0.684113	0.780956	0.701173	3360.12	20.4504	3349.39	10.8919	3343.65	12.4148	3343.65	12.4148	100.493
B2-2	part 2	2	233.835	168436	5.02034	3.7843	0.597208	23.1962	0.849785	0.642632	0.604481	0.711334	3199.36	15.2449	3235.21	8.27215	3258.19	9.40239	3258.19	9.40239	98.1944
B2-2	part 2	6	129.673	208219	2.31539	3.34094	0.826397	29.1796	1.15895	0.712633	0.81246	0.701034	3468.38	21.7933	3459.58	11.3783	3455.16	12.8124	3455.16	12.8124	100.382
B2-2	part 2	7	208.229	189907	2.44386	3.34905	0.625165	29.0625	0.881476	0.711508	0.621391	0.704943	3464.14	16.6527	3455.63	8.65285	3451.37	9.69888	3451.37	9.69888	100.37
B2-2	part 2	9	207.008	131885	2.62557	3.33384	0.74948	28.4647	1.05399	0.693703	0.740827	0.702881	3396.73	19.5602	3435.24	10.3391	3458.45	11.6191	3458.45	11.6191	98.2154
B2-2	part 2	15	225.158	304246	2.29767	3.34039	0.641192	28.5722	0.898152	0.695672	0.628914	0.700231	3404.22	16.6331	3438.94	8.81152	3459.89	9.93562	3459.89	9.93562	98.3908
B2-2	part 2	16	159.43	123831	2.11397	3.33299	0.578918	29.5468	0.839212	0.717918	0.607008	0.723307	3488.24	16.3526	3471.86	8.24244	3463.08	8.97704	3463.08	8.97704	100.726
B2-2	part 2	17	230.734	330220	4.47353	3.17701	0.602843	31.6886	0.840554	0.733799	0.585744	0.696855	3547.56	15.9811	3540.67	8.27393	3537.43	9.29624	3537.43	9.29624	100.286
B2-2	part 2	19	281.692	95015.8	1.73101	3.33762	0.697833	26.3455	0.98493	0.64051	0.695047	0.705682	3191.02	17.4937	3359.45	9.63538	3462.17	10.8124	3462.17	10.8124	92.1683
B2-2	part 2	21	231.859	297102	2.56887	3.34074	0.683805	29.2005	0.959498	0.710412	0.673078	0.70149	3460.01	18.0216	3460.28	9.42026	3461.11	10.5955	3461.11	10.5955	99.9683
B2-2	part 2	22	290.848	133138	1.9429	3.36052	0.576516	27.1208	0.794507	0.663816	0.546588	0.687958	3281.96	14.0579	3387.83	7.78057	3451.73	8.9449	3451.73	8.9449	95.0814
B2-2	part 2	23	274.976	82366.9	1.55926	3.37218	0.853725	27.5441	1.19528	0.677156	0.836495	0.699831	3333.44	21.772	3403.01	11.712	3444.89	13.2519	3444.89	13.2519	96.7646
B2-2	part 2	24	224.502	261655	2.83339	3.36253	0.521454	28.0515	0.710795	0.688449	0.482985	0.679501	3376.7	12.6951	3420.9	6.96897	3447.55	8.09237	3447.55	8.09237	97.9449
B2-2	part 2	28	201.704	133926	2.12913	3.33726	0.557533	29.3377	0.80526	0.714886	0.580941	0.721433	3476.85	15.6118	3464.88	7.90712	3458.64	8.6404	3458.64	8.6404	100.526
B2-2	part 2	29	119.787	170691	2.04901	3.34634	0.743916	28.5816	1.03055	0.698789	0.713158	0.692015	3416.05	18.9109	3439.26	10.1107	3453.47	11.5334	3453.47	11.5334	98.9165
B2-2	part 2	32	244.6	184173	2.13576	3.34343	0.851326	27.1033	1.20744	0.662062	0.856147	0.709058	3275.16	21.9847	3387.2	11.8245	3454.84	13.1997	3454.84	13.1997	94.7992
B2-2	part 2	33	160.036	221153	3.02125	3.34537	0.553179	29.101	0.785266	0.710773	0.55726	0.709645	3461.37	14.925	3456.93	7.70871	3455.03	8.5746	3455.03	8.5746	100.184
B2-2	part 2	35	282.034	59915.5	2.31507	3.36117	0.59126	29.3622	0.818798	0.720667	0.56636	0.691697	3498.54	15.2915	3465.71	8.04028	3447.45	9.17612	3447.45	9.17612	101.482
B2-2	part 2	36	230.641	334898	2.43778	3.33981	0.555519	28.5582	0.78808	0.696171	0.558968	0.709278	3406.11	14.7894	3438.46	7.73145	3458.02	8.60831	3458.02	8.60831	98.4988
B2-2	part 2	39	234.976	318828	2.61076	3.35456	0.531878	29.0592	0.731816	0.712964	0.502604	0.686789	3469.62	13.4854	3455.52	7.18366	3448.03	8.25397	3448.03	8.25397	100.626
B2-2	part 2	41	291.761	87379.3	2.18616	3.17437	0.586242	27.9432	0.85214	0.648922	0.618106	0.725358	3223.99	15.681	3417.11	8.35372	3533.02	9.04162	3533.02	9.04162	91.2531
B2-2	part 2	44	201.294	317079	2.61209	3.34086	0.656348	28.874	0.91974	0.706874	0.644231	0.700449	3446.66	17.1989	3449.25	9.02651	3451.42	10.1832	3451.42	10.1832	99.8623
B2-2	part 2	45	259.687	157741	1.42758	3.34516	0.605721	29.1475	0.858091	0.71462	0.607519	0.707989	3475.85	16.3225	3458.5	8.4241	3449.13	9.4027	3449.13	9.4027	100.775
B2-2	part 2	46	213.508	336378	3.02847	3.34036	0.490492	29.3081	0.715864	0.717449	0.52137	0.728308	3486.48	14.0402	3463.89	7.02905	3451.53	7.60984	3451.53	7.60984	101.013
B2-2	part 2	47	222.25	144522	1.66897	3.38173	0.648832	26.3976	0.922186	0.654294	0.655248	0.710538	3244.96	16.7065	3361.38	9.02218	3432.21	10.0814	3432.21	10.0814	94.5445
B2-2	part 2	52	191.024	236999	3.01247	3.3404	0.692251	28.9053	0.967439	0.706869	0.675781	0.698526	3446.64	18.0411	3450.31	9.49501	3453.11	10.7323	3453.11	10.7323	99.8128
B2-2	part 2	53	254.455	110327	2.69676	3.33124	0.599634	29.3844	0.847148	0.71538	0.598262	0.706207	3478.71	16.0837	3466.45	8.31889	3460.04	9.2933	3460.04	9.2933	100.539
B2-2	part 2	54	234.224	61928.8	1.69787	3.34542	0.606585	28.0723	0.855249	0.686509	0.6017	0.703538	3369.29	15.7891	3421.62	8.38554	3453.08	9.42157	3453.08	9.42157	97.5734
B2-2	part 2	57	299.333	88682.4	0.886524	3.85302	0.614483	21.24	0.860384	0.599324	0.602187	0.699905	3027.11	14.5471	3149.61	8.34357	3229.3	9.69653	3229.3	9.69653	93.7391
B2-2	part 2	59	298.588	130467	2.30436	3.33838	0.633372	28.5899	0.885748	0.697984	0.61917	0.699036	3413	16.4074	3439.54	8.69	3455.71	9.81695	3455.71	9.81695	98.7641
B2-2	part 2	60	287.02	132097	1.66603	3.4437	0.647626	26.4683	0.907977	0.66658	0.636385	0.700882	3292.66	16.4084	3364	8.88403	3407.43	10.0754	3407.43	10.0754	96.6316
B2-2	part 2	61	244.665	388010	2.21306	3.34079	0.547144	29.6341	0.772226	0.723878	0.544923	0.705651	3510.57	14.7507	3474.76	7.58524	3454.85	8.4801	3454.85	8.4801	101.613
B2-2	part 2	64	276.925	194451	2.40738	3.35209	0.639782	27.8215	0.878934	0.679545	0.602648	0.685658	3342.62	15.7185	3412.83	8.61511	3454.98	9.91684	3454.98	9.91684	96.7479
B2-2	part 2	65	242.498	88839.6	1.95126	3.3328	0.504051	26.5158	0.694621	0.64406	0.477902	0.688005	3204.95	12.0689	3365.75	6.79683	3463.59	7.80786	3463.59	7.80786	92.5327
B2-2	part 2	68	116.097	140564	2.10738	3.34958	0.671041	28.9232	0.939773	0.705886	0.657812	0.699969	3442.93	17.5471	3450.92	9.22366	3456.22	10.4025	3456.22	10.4025	99.6154
B2-2	part 2	69	237.026	130579	2.82227	3.37141	0.568009	25.9118	0.792708	0.635763	0.552672	0.697195	3172.34	13.8472	3343.21	7.75008	3447.97	8.8181	3447.97	8.8181	92.0059
B2-2	part 2	73	241.432	88708.3	2.52557	3.37345	0.465976	25.8019	0.655322	0.63424	0.46071	0.703028	3166.33	11.5261	3339.06	6.40585	3445.1	7.23321	3445.1	7.23321	91.9083
B2-2	part 2	76	137.529	216912	1.12798	3.82534	0.575129	23.4457	0.800727	0.65266	0.556929	0.69553	3238.59	14.1782	3245.63	7.798	3250.65	9.06226	3250.65	9.06226	99.6288
B2-2	part 2	77	243.939	441590	2.23587	3.34029	0.752442	28.9736	1.0617	0.704193	0.749018	0.705487	3436.53	19.9519	3452.62	10.4211	3462.63	11.6585	3462.63	11.6585	99.2461
B2-2	part 2	78	212.154	336311	1.62476	3.37464	0.516956	28.3974	0.745862	0.697478	0.537562	0.720726	3411.08	14.2388	3432.92	7.31586	3446.35	8.0241	3446.35	8.0241	98.9764
B2-2	part 2	79	217.587	242207	1.61904	3.36488	0.624902	28.4176	0.879842	0.696815	0.619324	0.703903	3408.56	16.3953	3433.61	8.63029	3448.93	9.69678	3448.93	9.69678	98.8295
B2-2	part 2	80	276.341	122797	1.96189	3.35448	0.648093	27.5137	0.90505	0.672658	0.63166	0.697928	3316.12	16.3753	3401.93	8.86766	3453.52	10.0476	3453.52	10.0476	96.0215
B2-2	part 2	90	194.538	23822.4	0.85845	3.80399	0.721	23.3564	0.997924	0.649478	0.689378	0.690812	3226.16	17.4982	3241.91	9.71703	3252.34	11.3639	3252.34	11.3639	99.1952
B2-2	part 2	91	181.841	290768	2.29691	3.34016	0.821602	29.1833	1.14917	0.711534	0.803458	0.699166	3464.24	21.5324	3459.7	11.2823	3457.75	12.7347	3457.75	12.7347	100.188
B2-2	part 2	93	231.171	295267	1.79987	3.3713	0.484463	27.5777	0.688165	0.679026	0.488677	0.710116	3340.62	12.74	3404.2	6.7431	3442.5	7.52162	3442.5	7.52162	97.0405
B2-2	part 2	94	192.349	229978	1.64568	3.33886	0.71369	29.4362	0.997711	0.718126	0.697173	0.698772	3489.02	18.7848	3468.18	9.79805	3456.83	11.062	3456.83	11.062	100.931
B2-2	part 2	99	250.512	344749	1.975	3.34181	0.82637	29.0096	1.16404	0.708268	0.819774	0.70425	3451.93	21.9107	3453.84	11.4261	3455.63	12.811	3455.63	12.811	99.893
B2-9	Part 1	6	225.756	176340	2.12648	3.85439	0.701876	22.548	0.987016	0.637015	0.693629	0.702754	3177.27	17.3998	3207.63	9.59668	3227.35	11.0818	3227.35	11.0818	98.4483
B2-9	Part 1	7	188.856	243040	2.94223	3.73584	0.700115	24.3538	0.986619	0.666821	0.695113	0.70454	3293.59	17.9265	3282.66	9.62313	3276.66	11.0018	3276.66	11.0018	100.517
B2-9	Part 1	8	431.552	80548.7	1.56677	3.82256	0.594699	22.2084	0.841001	0.621996	0.594043	0.706353	3117.86	14.685	3192.89	8.17161	3241.05	9.38446	3241.05	9.38446	96.1989
B2-9	Part 1	9	348.066	350778	2.03821	3.73863	0.58734	24.3643	0.832755	0.667131	0.590333	0.708892	3294.79	15.2285	3283.08	8.12246	3276.61	9.22839	3276.61	9.22839	100.555
B2-9	Part 1	12	290.212	438751	2.94276	3.73598	0.572412	24.3269	0.846375	0.663794	0.6234	0.736553	3281.87	16.0332	3281.58	8.25481	3282.08	8.99088	3282.08	8.99088	99.9938
B2-9	Part 1	13	403.223	337165	1.69638	3.73738	0.527098	24.5858	0.732773	0.670998	0.509029	0.694662	3309.73	13.1767	3291.91	7.14976	3281.75	8.2783	3281.75	8.2783	100.852
B2-9	Part 1	14	279.205	313038	2.25338	3.73669	0.507442	24.01	0.714795	0.655167	0.503355	0.704194	3248.36	12.8441	3268.8	6.96782	3282.03	7.97014	3282.03	7.97014	98.9743
B2-9	Part 1	15	426.76	570769	2.17721	3.73458	0.600034	24.3735	0.87102	0.664673	0.631347	0.724837	3285.28	16.2505	3283.45	8.49583	3283	9.42383	3283	9.42383	100.069
B2-9	Part 1	17	324.84	545656	2.68846	3.73843	0.701798	24.3083	0.994004	0.66358	0.703911	0.708157	3281.04	18.1003	3280.84	9.69444	3281.38	11.024	3281.38	11.024	99.9899
B2-9	Part 1	18	432.582	500620	2.18473	3.74276	0.48395	24.0316	0.689214	0.656716	0.490715	0.711993	3254.39	12.5394	3269.67	6.71868	3279.73	7.60125	3279.73	7.60125	99.2275
B2-9	Part 1	20	169.087	249526	2.21205	3.7398	0.952118	24.2694	1.34006	0.662661	0.942898	0.703624	3277.48	24.2255	3279.27	13.069	3281.04	14.9592	3281.04	14.9592	99.8915
B2-9	Part 1	21	408.232	297599	2.0139	3.73837	0.527466	23.8494	0.750828	0.65093	0.534329	0.711653	3231.84	13.581	3262.26	7.3171	3281.68	8.28415	3281.68	8.28415	98.4812
B2-9	Part 1	23	440.082	543759	2.22217	3.73878	0.685059	24.4254	0.960936	0.666685	0.673858	0.701251	3293.06	17.3762	3285.52	9.37369	3281.6	10.7605	3281.6	10.7605	100.349
B2-9	Part 1	25	421.907	450030	2.45605	3.73764	0.675821	24.368	0.955848	0.6648	0.675944	0.707167	3285.77	17.4004	3283.23	9.32319	3282.35	10.6148	3282.35	10.6148	100.104
B2-9	Part 1	26	297.815	361279	2.64494	3.73896	0.533092	24.146	0.741865	0.65899	0.515913	0.695427	3263.23	13.2108	3274.3	7.23333	3281.76	8.37245	3281.76	8.37245	99.4354
B2-9	Part 1	27	405.948	765849	2.55875	3.73637	0.604189	24.3544	0.853395	0.664181	0.60269	0.706227	3283.37	15.506	3282.68	8.32365	3282.93	9.48874	3282.93	9.48874	100.013
B2-9	Part 1	28	320.689	530059	2.67797	3.73626	0.734033	24.578	1.03595	0.670198	0.731011	0.705644	3306.64	18.9094	3291.6	10.1079	3283.12	11.5288	3283.12	11.5288	100.716
B2-9	Part 1	30	363.769	135312	2.16263	3.76618	0.587419	23.3675	0.828492	0.642388	0.584228	0.70517	3198.4	14.7307	3242.37	8.06731	3270.36	9.2337	3270.36	9.2337	97.7994
B2-9	Part 1	31	373.83	304503	2.53383	3.73573	0.546655	24.3089	0.756996	0.662756	0.523634	0.691727	3277.85	13.4546	3280.86	7.38283	3283.37	8.58983	3283.37	8.58983	99.8317
B2-9	Part 1	32	324.509	508000	2.65985	3.73736	0.493275	24.2474	0.701832	0.661333	0.499211	0.711297	3272.33	12.8105	3278.39	6.84413	3282.77	7.75176	3282.77	7.75176	99.6821
B2-9	Part 1	34	459.615	294993	2.03473	3.73812	0.764901	24.1842	1.07654	0.65978	0.757522	0.703665	3266.3	19.4117	3275.85	10.4973	3282.36	12.0146	3282.36	12.0146	99.5107
B2-9	Part 1	36	351.5	521625	2.68524	3.73505	0.549041	24.4311	0.756208	0.665932	0.519965	0.687596	3290.15	13.3988	3285.75	7.3766	3283.74	8.62739	3283.74	8.62739	100.195
B2-9	Part 1	37	398.974	523292	2.64186	3.7364	0.646869	23.9748	0.914768	0.653729	0.6468	0.707064	3242.76	16.4825	3267.37	8.91672	3283.17	10.1593	3283.17	10.1593	98.769
B2-9	Part 1	38	290.761	238709	2.74379	3.73325	0.957161	24.3676	1.36003	0.664228	0.966166	0.710399	3283.55	24.8586	3283.21	13.2659	3283.68	15.0345	3283.68	15.0345	99.9962
B2-9	Part 1	39	435.99	592351	2.33233	3.7363	0.626705	24.3668	0.885229	0.664779	0.625192	0.706249	3285.69	16.0936	3283.18	8.63433	3282.32	9.84299	3282.32	9.84299	100.103
B2-9	Part 1	41	308.691	272187	2.28591	3.73606	0.557326	24.3416	0.769248	0.664099	0.530101	0.689116	3283.06	13.6374	3282.17	7.50273	3282.3	8.7545	3282.3	8.7545	100.023
B2-9	Part 1	43	425.993	569467	2.07624	3.73915	0.637302	24.268	0.90567	0.662588	0.643492	0.710515	3277.2	16.5319	3279.22	8.83231	3281.12	10.0103	3281.12	10.0103	99.8805
B2-9	Part 1	44	227.601	376188	1.766	3.73643	0.620052	24.0654	0.87142	0.657082	0.612288	0.702632	3255.82	15.6513	3271.04	8.49545	3281.06	9.73942	3281.06	9.73942	99.2306
B2-9	Part 1	45	331.11	113182	2.72906	3.7359	0.546789	23.7789	0.774777	0.648433	0.54879	0.70832	3222.08	13.9161	3259.37	7.5496	3283.06	8.5886	3283.06	8.5886	98.1426
B2-9	Part 1	48	369.589	346009	1.58256	3.73587	0.52043	23.7078	0.760376	0.646341	0.554345	0.72904	3213.89	14.0295	3256.46	7.40838	3283.44	8.17785	3283.44	8.17785	97.8819
B2-9	Part 1	49	305.842	142014	2.05233	3.73762	0.564209	24.1809	0.787586	0.659653	0.548847	0.696873	3265.81	14.0627	3275.71	7.67958	3282.45	8.87093	3282.45	8.87093	99.493
B2-9	Part 1	50	354.937	570242	2.55379	3.73743	0.609155	24.2853	0.855046	0.661909	0.600019	0.701738	3274.57	15.4055	3279.91	8.33882	3283.85	9.56625	3283.85	9.56625	99.7171
B2-9	Part 1	51	458.931	870514	2.0293	3.73653	0.581707	24.3384	0.824709	0.663183	0.584592	0.708847	3279.51	15.0268	3282.04	8.04364	3284.27	9.13988	3284.27	9.13988	99.855
B2-9	Part 1	54	349.006	77370.9	2.1509	3.72965	0.527255	24.0099	0.757682	0.654277	0.542403	0.715871	3244.89	13.8291	3268.8	7.38589	3284.16	8.31222	3284.16	8.31222	98.8045
B2-9	Part 1	56	360.952	517331	2.74422	3.74122	0.595719	24.3049	0.845868	0.664086	0.600503	0.709925	3283	15.4484	3280.7	8.24957	3279.96	9.35772	3279.96	9.35772	100.093
B2-9	Part 1	62	280.865	201078	2.04581	3.74644	0.62515	24.7145	0.882835	0.675098	0.623144	0.705844	3325.52	16.1895	3297	8.61576	3280.38	9.82333	3280.38	9.82333	101.376
B2-9	Part 1	64	448.604	426804	2.29103	3.73343	0.449537	24.5237	0.607393	0.667259	0.40841	0.672398	3295.29	10.5367	3289.44	5.9258	3286.55	7.0625	3286.55	7.0625	100.266
B2-9	Part 1	66	468.177	514896	1.90691	3.7369	0.590982	24.3687	0.840161	0.66365	0.59716	0.710769	3281.31	15.3563	3283.26	8.19475	3285.11	9.28492	3285.11	9.28492	99.8844
B2-9	Part 1	68	207.96	285802	1.95856	3.7404	0.569598	24.7007	0.783023	0.673995	0.537208	0.68607	3321.28	13.9433	3296.46	7.64147	3282.07	8.94698	3282.07	8.94698	101.195
B2-9	Part 1	69	307.826	138596	2.26584	3.7319	0.561251	24.0428	0.791242	0.654868	0.557645	0.704772	3247.2	14.2255	3270.13	7.71347	3284.89	8.81914	3284.89	8.81914	98.8526
B2-9	Part 1	70	229.619	184708	2.77216	3.74157	0.578496	24.2855	0.820487	0.663148	0.58168	0.708945	3279.37	14.9514	3279.92	8.00177	3280.93	9.08887	3280.93	9.08887	99.9524
B2-9	Part 1	72	377.564	623489	2.59067	3.73585	0.439652	24.5609	0.60782	0.669542	0.419664	0.690441	3304.11	10.8493	3290.92	5.93032	3283.57	6.9087	3283.57	6.9087	100.625
B2-9	Part 1	73	356.943	565312	2.59858	3.73576	0.558236	24.6542	0.794603	0.671799	0.565472	0.711641	3312.82	14.6482	3294.62	7.75392	3284.24	8.77105	3284.24	8.77105	100.87
B2-9	Part 1	75	388.115	67299.2	1.68408	3.75	0.576811	24.286	0.819151	0.664972	0.580007	0.708059	3286.44	14.9331	3279.94	7.98874	3276.64	9.08829	3276.64	9.08829	100.299
B2-9	Part 1	76	428.898	717675	2.41662	3.73592	0.515009	24.5762	0.726289	0.670042	0.512112	0.705108	3306.04	13.2452	3291.53	7.08639	3283.38	8.09235	3283.38	8.09235	100.69
B2-9	Part 1	78	273.293	107644	2.57921	3.73881	0.573209	24.1261	0.817454	0.658403	0.582794	0.712938	3260.95	14.9154	3273.5	7.97011	3281.87	9.00281	3281.87	9.00281	99.3627
B2-9	Part 1	79	378.721	424174	1.96376	3.7352	0.5002	24.2154	0.726042	0.659475	0.526233	0.724797	3265.12	13.4811	3277.1	7.07985	3285.11	7.85875	3285.11	7.85875	99.3913
B2-9	Part 1	80	392.416	338741	2.09493	3.73531	0.580955	24.3411	0.819784	0.662935	0.578359	0.705501	3278.54	14.8632	3282.15	7.99564	3285.03	9.12784	3285.03	9.12784	99.8026
B2-9	Part 1	82	449.283	594719	2.19298	3.73882	0.503088	24.1265	0.718195	0.657675	0.512535	0.713643	3258.12	13.1085	3273.52	7.00232	3283.63	7.90507	3283.63	7.90507	99.223
B2-9	Part 1	83	380.091	451876	2.14084	3.73792	0.632236	24.4273	0.90222	0.665398	0.643636	0.713392	3288.08	16.5777	3285.6	8.80093	3284.76	9.93336	3284.76	9.93336	100.101
B2-9	Part 1	84	228.421	81956.5	2.12031	3.73867	0.601476	24.6973	0.839408	0.672963	0.584177	0.695939	3317.3	15.1485	3296.33	8.19171	3284.27	9.47079	3284.27	9.47079	101.006
B2-9	Part 1	85	283.989	207839	2.26971	3.74067	0.651023	24.0358	0.919995	0.655104	0.649793	0.706301	3248.11	16.5798	3269.85	8.96858	3283.87	10.2279	3283.87	10.2279	98.9112
B2-9	Part 1	87	348.699	332570	1.90886	3.73722	0.586789	24.3063	0.821388	0.661817	0.574696	0.699664	3274.21	14.7541	3280.76	8.01083	3285.43	9.21978	3285.43	9.21978	99.6583
B2-9	Part 1	88	440.009	141894	1.82445	3.74628	0.520501	23.7938	0.7218	0.650252	0.499901	0.692576	3229.19	12.698	3259.98	7.03355	3279.65	8.17826	3279.65	8.17826	98.4615
B2-9	Part 1	89	412.833	360280	2.42996	3.74051	0.534144	24.3143	0.743026	0.663854	0.516479	0.695102	3282.1	13.284	3281.08	7.24665	3281.12	8.38961	3281.12	8.38961	100.03
B2-9	Part 1	90	338.171	548439	2.70333	3.73869	0.659828	24.0563	0.927482	0.656576	0.651798	0.702761	3253.85	16.6535	3270.68	9.04188	3281.68	10.364	3281.68	10.364	99.1519
B2-9	Part 1	91	429.92	94061.1	2.47711	3.73324	0.566264	23.0372	0.765475	0.628115	0.514937	0.672702	3142.13	12.8064	3228.51	7.44929	3283.29	8.89448	3283.29	8.89448	95.7005
B2-9	Part 1	92	342.704	69341.9	2.44222	3.74287	0.517403	23.9742	0.737507	0.655054	0.523928	0.710403	3247.92	13.3676	3267.34	7.18879	3279.95	8.15273	3279.95	8.15273	99.0233
B2-9	Part 1	93	259.047	51731.3	2.60617	3.72659	0.577257	24.1245	0.808819	0.656415	0.564094	0.697429	3253.22	14.4105	3273.44	7.8859	3286.51	9.10562	3286.51	9.10562	98.987
B2-9	Part 1	94	291.478	122650	1.55033	3.73388	0.561481	23.7071	0.80673	0.645735	0.579164	0.717915	3211.52	14.6492	3256.43	7.86002	3284.87	8.82319	3284.87	8.82319	97.767
B2-9	Part 1	95	231.451	395157	3.23254	3.73876	0.70602	24.2428	0.996695	0.661043	0.703487	0.70582	3271.21	18.0478	3278.21	9.71965	3283.16	11.089	3283.16	11.089	99.6359
B2-9	Part 1	96	461.614	709655	2.35481	3.73648	0.826592	24.5081	1.15642	0.66784	0.808726	0.699339	3297.53	20.8756	3288.82	11.2822	3284.19	12.9821	3284.19	12.9821	100.406
B2-9	Part 1	98	388.798	64424.9	2.5854	3.72692	0.59816	22.9354	0.846075	0.623732	0.597741	0.706487	3124.75	14.8019	3224.21	8.23217	3287.34	9.40575	3287.34	9.40575	95.0541
B4-1	part 1	1	158.41	99206.3	2.50889	3.34018	0.821348	29.4565	1.16366	0.714895	0.824091	0.708187	3476.89	22.1462	3468.85	11.4282	3464.88	12.7281	3464.88	12.7281	100.347
B4-1	part 1	2	186.742	92884	3.359	3.34049	0.71468	29.5659	1.02353	0.717632	0.73188	0.715053	3487.16	19.712	3472.49	10.0531	3464.7	11.0845	3464.7	11.0845	100.648
B4-1	part 1	3	239.142	131587	2.99713	3.36551	0.661299	29.2553	0.916244	0.714352	0.634022	0.691979	3474.85	17.0308	3462.12	8.99613	3455.44	10.2525	3455.44	10.2525	100.562
B4-1	part 1	4	218.453	137215	1.85252	3.34136	0.640036	29.5017	0.928864	0.715191	0.673046	0.724591	3478	18.0915	3470.36	9.12256	3466.61	9.91505	3466.61	9.91505	100.328
B4-1	part 1	5	215.046	100603	1.92444	3.34246	0.759243	29.3524	1.10107	0.711865	0.797151	0.723975	3465.49	21.3692	3465.38	10.8122	3465.97	11.7659	3465.97	11.7659	99.986
B4-1	part 1	9	189.335	94537.7	2.48322	3.3388	0.669669	29.7218	0.930056	0.720247	0.645246	0.693772	3496.97	17.4155	3477.66	9.13648	3467.21	10.3744	3467.21	10.3744	100.858
B4-1	part 1	12	150.036	73032.1	1.93647	3.40356	0.908019	28.6329	1.26031	0.703948	0.873904	0.693405	3435.6	23.2738	3441.02	12.3657	3444.84	14.095	3444.84	14.095	99.7318
B4-1	part 1	13	161.719	93121.7	2.51017	3.34388	0.788326	29.8354	1.11803	0.720569	0.79245	0.708791	3498.18	21.3942	3481.41	10.9846	3472.43	12.2121	3472.43	12.2121	100.741
B4-1	part 1	14	126.262	59323.8	1.77657	3.3355	0.620685	29.8913	0.875264	0.721828	0.615352	0.703047	3502.9	16.6298	3483.25	8.59979	3472.63	9.6427	3472.63	9.6427	100.872
B4-1	part 1	15	228.47	119138	2.63365	3.34324	0.664633	29.5993	0.961799	0.716243	0.694825	0.722422	3481.95	18.6929	3473.6	9.44706	3469.45	10.2988	3469.45	10.2988	100.36
B4-1	part 1	21	207.067	125572	1.74924	3.34913	0.937654	29.2819	1.34691	0.711617	0.96689	0.717859	3464.55	25.9142	3463.02	13.2254	3462.79	14.5302	3462.79	14.5302	100.051
B4-1	part 1	22	216.02	35027.4	2.43509	3.3498	0.694548	29.231	1.00302	0.710996	0.721678	0.719504	3462.21	19.3322	3461.31	9.84793	3461.45	10.7932	3461.45	10.7932	100.022
B4-1	part 1	24	144.332	43130.2	2.68037	3.47934	0.751741	27.8323	1.06424	0.707447	0.752824	0.707382	3448.83	20.1076	3413.2	10.4317	3393.03	11.715	3393.03	11.715	101.644
B4-1	part 1	25	129.435	77358.9	3.13465	3.34025	0.81986	29.2315	1.07938	0.713043	0.700969	0.649416	3469.92	18.809	3461.32	10.5977	3457.03	12.7228	3457.03	12.7228	100.373
B4-1	part 1	28	154.209	93747.2	2.13921	3.34342	0.684614	29.7129	0.9889	0.725417	0.712889	0.72089	3516.32	19.3212	3477.36	9.71449	3455.67	10.6231	3455.67	10.6231	101.755
B4-1	part 1	29	135.181	81410.4	2.64302	3.3361	0.708417	29.5307	1.02727	0.719429	0.743725	0.723985	3493.91	20.0602	3471.32	10.0894	3458.99	10.9816	3458.99	10.9816	101.009
B4-1	part 1	30	113.953	64136.1	2.31681	3.34515	0.829797	29.4091	1.16891	0.718488	0.822227	0.703413	3490.38	22.1608	3467.27	11.4791	3454.62	12.8805	3454.62	12.8805	101.035
B4-1	part 1	31	144.36	85605.3	2.17169	3.34266	0.700888	29.1234	0.959763	0.710889	0.655159	0.682626	3461.81	17.5488	3457.69	9.42203	3455.97	10.8711	3455.97	10.8711	100.169
B4-1	part 1	33	202.551	102666	2.09137	3.34107	0.686708	28.7099	1.05401	0.700419	0.799148	0.758196	3422.24	21.2202	3443.65	10.3424	3456.8	10.6516	3456.8	10.6516	99.0001
B4-1	part 1	35	87.1929	54313	2.17245	3.31909	0.79958	29.297	1.05113	0.711453	0.681687	0.648525	3463.93	18.2678	3463.52	10.3211	3463.94	12.3963	3463.94	12.3963	99.9998
B4-1	part 1	36	233.156	131643	2.18555	3.34722	0.707617	28.9472	1.00243	0.70867	0.709885	0.708166	3453.44	18.9799	3451.73	9.8389	3451.4	10.9736	3451.4	10.9736	100.059
B4-1	part 1	37	161.093	25496	2.63214	3.42856	0.759	27.6754	1.22768	0.694752	0.957637	0.780039	3400.72	25.3073	3407.67	12.0315	3412.42	11.9533	3412.42	11.9533	99.6571
B4-1	part 1	38	210.773	104088	3.17487	3.37503	0.677792	29.794	0.997292	0.73551	0.731365	0.733351	3553.91	19.9809	3480.04	9.7978	3438.46	10.5285	3438.46	10.5285	103.358
B4-1	part 1	40	179.143	83698.3	3.04714	3.46248	0.909083	26.7882	1.36659	0.679059	1.01989	0.746307	3340.75	26.5899	3375.75	13.3775	3397.27	14.163	3397.27	14.163	98.3363
B4-1	part 1	41	204.518	104289	2.64448	3.73832	0.676197	24.42	0.94231	0.668313	0.656164	0.696335	3299.36	16.9447	3285.31	9.19191	3277.41	10.6262	3277.41	10.6262	100.67
B4-1	part 1	42	226.638	146585	2.19181	3.35755	0.703501	28.74	1.05644	0.706325	0.788063	0.745958	3444.59	21.0292	3444.68	10.3666	3445.41	10.9199	3445.41	10.9199	99.9763
B4-1	part 1	43	187.394	104358	3.75398	3.34382	0.671184	29.1284	0.968533	0.713004	0.697876	0.720549	3469.77	18.7254	3457.86	9.50818	3451.63	10.4122	3451.63	10.4122	100.526
B4-1	part 1	44	112.373	61643	2.45825	3.3383	0.653448	29.1959	0.886809	0.711646	0.598881	0.675321	3464.66	16.0513	3460.13	8.70652	3458.17	10.1358	3458.17	10.1358	100.188
B4-1	part 1	45	155.716	80773.2	1.76676	3.34354	0.756526	29.0779	1.05121	0.709795	0.729576	0.694033	3457.69	19.5245	3456.15	10.3193	3455.93	11.7312	3455.93	11.7312	100.051
B4-1	part 1	46	248.117	110892	3.46689	3.39069	0.82616	28.4167	1.1783	0.700163	0.839907	0.712812	3421.27	22.2977	3433.58	11.558	3441.44	12.8301	3441.44	12.8301	99.4137
B4-1	part 1	48	207.119	112176	1.99908	3.34207	0.899756	29.2425	1.25027	0.708186	0.867725	0.694029	3451.62	23.1907	3461.69	12.2759	3468.19	13.9426	3468.19	13.9426	99.5221
B4-1	part 1	49	94.7744	65077.4	2.79324	3.37127	0.731884	28.7091	1.01966	0.701495	0.709436	0.695759	3426.32	18.855	3443.62	10.0053	3454.38	11.3536	3454.38	11.3536	99.1877
B4-1	part 1	50	130.107	85656.4	2.09371	3.36302	0.741417	28.8533	0.941638	0.705177	0.580438	0.616413	3440.25	15.474	3448.54	9.24122	3454.03	11.4946	3454.03	11.4946	99.601
B4-1	part 1	51	182.12	100873	3.41292	3.34827	0.660891	29.3459	0.928786	0.717293	0.652245	0.702255	3485.89	17.5623	3465.16	9.12021	3453.87	10.25	3453.87	10.25	100.927
B4-1	part 1	55	154.812	82351	2.42975	3.32587	0.881599	29.4919	1.14616	0.71609	0.732263	0.638882	3481.38	19.6976	3470.03	11.2567	3464.15	13.6615	3464.15	13.6615	100.497
B4-1	part 1	56	198.365	95465.2	3.07684	3.40599	0.656163	28.2729	0.902434	0.702999	0.619386	0.686351	3432.01	16.4824	3428.6	8.85036	3427.28	10.2004	3427.28	10.2004	100.138
B4-1	part 1	57	189.404	103333	2.48364	3.3783	0.890734	28.4281	1.22513	0.700386	0.840932	0.686402	3422.11	22.3291	3433.97	12.0176	3441.57	13.8319	3441.57	13.8319	99.4346
B4-1	part 1	64	208.719	116971	3.62596	3.34074	0.797913	28.8881	1.12969	0.705664	0.799653	0.707852	3442.09	21.3268	3449.72	11.0873	3454.83	12.3704	3454.83	12.3704	99.6313
B4-1	part 1	66	75.3733	41824.1	3.45137	3.35179	0.791539	28.9766	1.0804	0.710526	0.732349	0.677848	3460.44	19.6105	3452.73	10.6047	3448.93	12.3248	3448.93	12.3248	100.334
B4-1	part 1	68	217.555	109721	2.3665	3.37613	0.692623	28.5947	1.0657	0.708902	0.809774	0.75985	3454.32	21.6547	3439.71	10.4557	3431.88	10.7639	3431.88	10.7639	100.654
B4-1	part 1	70	239.535	120615	1.63892	3.34507	0.657496	28.945	1.01082	0.709087	0.767628	0.759409	3455.01	20.5308	3451.66	9.9213	3450.38	10.2032	3450.38	10.2032	100.134
B4-1	part 1	71	161.058	53377.7	2.11153	3.45213	0.740923	27.0244	1.07006	0.68348	0.771128	0.720641	3357.7	20.182	3384.35	10.4779	3400.82	11.5475	3400.82	11.5475	98.7319
B4-1	part 1	72	106.651	74875.6	2.53209	3.34883	0.726787	29.0832	1.0466	0.713388	0.752922	0.719397	3471.22	20.2088	3456.33	10.2741	3448.38	11.2803	3448.38	11.2803	100.662
B4-1	part 1	73	148.002	100732	1.6473	3.33862	0.718474	29.5097	1.02953	0.719652	0.737278	0.716127	3494.74	19.8899	3470.63	10.1114	3457.41	11.1372	3457.41	11.1372	101.08
B4-1	part 1	75	160.155	12935.5	1.58537	3.33189	0.769793	29.8127	1.09005	0.726294	0.763328	0.700266	3519.59	20.7028	3480.66	10.7094	3459	12.0601	3459	12.0601	101.752
B4-1	part 1	78	201.197	129398	2.09291	3.34295	0.792627	29.9599	1.11597	0.730671	0.785488	0.703864	3535.92	21.378	3485.5	10.9658	3457.32	12.2869	3457.32	12.2869	102.273
B4-1	part 1	79	173.409	81171	2.37341	3.39653	0.83069	28.402	1.20066	0.703423	0.866395	0.721599	3433.62	23.0638	3433.07	11.7772	3433.43	12.913	3433.43	12.913	100.006
B4-1	part 1	82	155.618	92148.1	3.50066	3.34259	1.15896	29.5961	1.64858	0.721311	1.17223	0.711053	3500.96	31.6663	3473.49	16.1937	3458.36	17.9693	3458.36	17.9693	101.232
B4-1	part 1	84	221.092	127051	2.22006	3.74536	0.728964	24.5737	1.04108	0.671763	0.743143	0.713817	3312.68	19.2501	3291.43	10.158	3279.18	11.4546	3279.18	11.4546	101.021
B4-1	part 1	87	171.335	111390	1.57704	3.34588	0.72574	29.7111	1.04171	0.725565	0.747173	0.717255	3516.87	20.2528	3477.31	10.2333	3455.26	11.2518	3455.26	11.2518	101.783
B4-1	part 1	89	109.698	68341	1.73322	3.34218	0.760347	29.7	1.08522	0.724621	0.774086	0.713297	3513.34	20.9665	3476.94	10.6606	3456.7	11.7892	3456.7	11.7892	101.639
B4-1	part 1	90	155.13	68572.8	1.20154	3.33732	0.689246	30.3157	1.06352	0.740033	0.809503	0.761152	3570.69	22.1938	3497.1	10.4544	3455.88	10.6914	3455.88	10.6914	103.322
B4-1	part 1	92	170.551	98568.4	1.10005	3.35079	0.748401	29.569	1.1298	0.72483	0.846313	0.749082	3514.13	22.9267	3472.6	11.097	3449.4	11.613	3449.4	11.613	101.876
B4-1	part 1	93	176.026	115869	1.78948	3.37859	0.70487	29.4416	0.998187	0.727998	0.706561	0.707844	3525.95	19.1891	3468.36	9.80278	3435.93	10.9512	3435.93	10.9512	102.62
B4-1	part 1	94	160.615	96252	1.33646	3.33839	0.641285	29.3467	0.929236	0.717257	0.672412	0.723618	3485.76	18.1048	3465.19	9.12464	3453.99	9.9417	3453.99	9.9417	100.92
B4-1	part 1	98	173.006	100409	1.50182	3.36993	0.741768	28.9193	1.05582	0.713483	0.75116	0.711448	3471.57	20.163	3450.78	10.3626	3439.41	11.5209	3439.41	11.5209	100.935
B4-1	part 1	99	127.9	97128.9	1.31126	3.34373	0.662761	29.4406	0.99035	0.721252	0.735566	0.742734	3500.74	19.8694	3468.32	9.7258	3450.33	10.2881	3450.33	10.2881	101.461
B4-1	part 1	100	73.876	40123.9	2.91944	3.33066	0.702487	30.658	0.905839	0.74848	0.570353	0.62964	3601.92	15.7392	3508.14	8.90743	3455.69	10.9081	3455.69	10.9081	104.231
B4-1	part 2	2	293.242	581988	3.44484	3.38244	0.69415	28.3635	0.984478	0.700864	0.698102	0.709109	3423.92	18.544	3431.74	9.65609	3436.98	10.7805	3436.98	10.7805	99.6201
B4-1	part 2	5	212.356	409068	1.96575	3.36329	0.777616	29.1338	1.26366	0.715034	0.996049	0.788225	3477.41	26.7704	3458.04	12.4058	3447.51	12.0674	3447.51	12.0674	100.867
B4-1	part 2	6	239.189	598854	3.6645	3.42225	0.758576	27.6411	1.17103	0.690274	0.89211	0.761819	3383.66	23.4857	3406.45	11.4757	3420.55	11.7961	3420.55	11.7961	98.9218
B4-1	part 2	7	110.119	338762	3.18161	3.35628	0.772769	28.2304	1.02122	0.691427	0.667598	0.653723	3388.06	17.5925	3427.13	10.0149	3450.72	11.9833	3450.72	11.9833	98.1841
B4-1	part 2	8	204.207	555523	1.79597	3.34001	0.645811	28.9372	0.929481	0.705276	0.668462	0.719177	3440.62	17.8222	3451.39	9.12279	3458.32	10.0083	3458.32	10.0083	99.4884
B4-1	part 2	10	202.113	501272	2.27723	3.33794	1.28511	28.6447	1.81598	0.69772	1.28306	0.706542	3412	33.9927	3441.42	17.8189	3459.26	19.921	3459.26	19.921	98.6336
B4-1	part 2	11	153.897	446701	2.06637	3.34244	0.732824	28.2484	1.02252	0.688557	0.71308	0.697378	3377.11	18.7448	3427.76	10.0278	3458.16	11.3577	3458.16	11.3577	97.6562
B4-1	part 2	13	192.569	588115	2.19941	3.34784	0.816568	28.0331	1.10929	0.68625	0.750826	0.676852	3368.3	19.6979	3420.25	10.876	3451.5	12.6618	3451.5	12.6618	97.5893
B4-1	part 2	14	159.537	403818	2.86601	3.34665	0.736103	28.6499	1.00378	0.704424	0.682431	0.67986	3437.4	18.1817	3441.6	9.84878	3444.71	11.4254	3444.71	11.4254	99.7879
B4-1	part 2	15	194.773	611019	3.02565	3.37975	0.734581	28.3439	1.01742	0.703775	0.703937	0.691886	3434.95	18.7445	3431.07	9.97895	3429.47	11.415	3429.47	11.415	100.16
B4-1	part 2	16	144.783	412467	2.0023	3.34458	0.814243	28.3892	1.11539	0.697583	0.762294	0.683433	3411.48	20.1933	3432.63	10.9405	3445.67	12.6372	3445.67	12.6372	99.0076
B4-1	part 2	17	249.388	566515	2.33106	3.34565	0.637933	28.401	0.973732	0.69808	0.735656	0.755502	3413.36	19.4958	3433.04	9.55111	3445.21	9.90113	3445.21	9.90113	99.0756
B4-1	part 2	18	107.814	285171	2.97935	3.34079	0.654365	28.7189	0.885063	0.70491	0.595873	0.673256	3439.24	15.882	3443.96	8.6846	3447.38	10.1553	3447.38	10.1553	99.7641
B4-1	part 2	19	117.947	342380	2.38747	3.34586	0.693327	28.6373	1.05208	0.698764	0.791298	0.752124	3415.96	20.9825	3441.17	10.3226	3456.54	10.7464	3456.54	10.7464	98.826
B4-1	part 2	20	260.917	669902	3.70179	3.36912	0.60585	28.07	0.959711	0.689651	0.7443	0.775545	3381.29	19.5839	3421.54	9.4098	3445.87	9.40276	3445.87	9.40276	98.1258
B4-1	part 2	23	236.721	692813	2.17899	3.3483	0.572277	28.1177	0.792748	0.686127	0.54858	0.691998	3367.83	14.3904	3423.21	7.77313	3456.45	8.86883	3456.45	8.86883	97.436
B4-1	part 2	26	103.43	374717	2.71236	3.34403	0.701759	28.6358	0.999231	0.697906	0.711296	0.711844	3412.7	18.8475	3441.11	9.80396	3458.37	10.8762	3458.37	10.8762	98.6796
B4-1	part 2	27	176.301	542470	3.99223	3.34231	0.690427	28.3709	0.907847	0.691076	0.589487	0.649324	3386.72	15.5294	3432	8.9045	3459.21	10.6993	3459.21	10.6993	97.9046
B4-1	part 2	28	120.163	340592	2.65636	3.34225	0.71829	28.5347	0.998053	0.693987	0.692903	0.694255	3397.81	18.2992	3437.65	9.79124	3461.62	11.1302	3461.62	11.1302	98.1566
B4-1	part 2	30	84.815	213552	1.87789	3.35806	0.793897	28.6303	1.03174	0.699646	0.658804	0.638536	3419.31	17.4822	3440.93	10.1229	3454.21	12.3097	3454.21	12.3097	98.9895
B4-1	part 2	32	231.614	390539	3.15946	3.39747	0.761814	27.4917	1.12199	0.67966	0.823677	0.734123	3343.06	21.4856	3401.14	10.9931	3436.21	11.8325	3436.21	11.8325	97.2892
B4-1	part 2	34	134.144	363223	1.86002	3.34244	0.896932	28.337	1.23478	0.68936	0.848617	0.687261	3380.17	22.3231	3430.82	12.111	3461.21	13.9	3461.21	13.9	97.6589
B4-1	part 2	35	148.43	410011	2.85345	3.34242	0.662157	28.679	0.934035	0.697668	0.658746	0.705269	3411.8	17.4515	3442.59	9.16473	3461.23	10.2599	3461.23	10.2599	98.5719
B4-1	part 2	38	160.604	471020	2.08176	3.36121	0.657367	28.45	0.97306	0.695983	0.717431	0.737293	3405.4	18.9791	3434.73	9.54508	3452.56	10.1911	3452.56	10.1911	98.6341
B4-1	part 2	39	140.904	384405	2.96105	3.34326	0.79749	28.7563	1.05551	0.699728	0.69143	0.655069	3419.62	18.3492	3445.24	10.3576	3460.84	12.3584	3460.84	12.3584	98.809
B4-1	part 2	40	198.715	557218	2.06468	3.34324	1.01637	28.4044	1.43912	0.691144	1.01884	0.707961	3386.98	26.842	3433.16	14.1165	3460.88	15.752	3460.88	15.752	97.8646
B4-1	part 2	42	234.788	666987	2.17889	3.34407	0.779321	28.412	1.07846	0.691494	0.745467	0.691232	3388.31	19.6456	3433.42	10.5786	3460.52	12.0769	3460.52	12.0769	97.9135
B4-1	part 2	45	131.16	399078	3.96519	3.33807	0.662711	28.2602	0.869904	0.687264	0.563496	0.647768	3372.17	14.7962	3428.16	8.53119	3461.72	10.2681	3461.72	10.2681	97.4131
B4-1	part 2	46	141.073	452146	3.34614	3.34538	0.782242	28.8513	1.12479	0.703169	0.808219	0.718553	3432.65	21.5105	3448.47	11.0387	3458.34	12.124	3458.34	12.124	99.2572
B4-1	part 2	47	285.52	830741	2.46966	3.40324	0.739636	27.5525	1.01931	0.683107	0.701381	0.688092	3356.27	18.3506	3403.3	9.98776	3431.78	11.4915	3431.78	11.4915	97.7997
B4-1	part 2	48	289.742	965409	2.07974	3.37319	0.718505	28.1598	1.00766	0.692382	0.70649	0.701118	3391.7	18.6326	3424.68	9.88105	3444.7	11.1521	3444.7	11.1521	98.4614
B4-1	part 2	49	199.555	543936	2.9172	3.34052	0.687119	28.6931	0.984001	0.698677	0.704358	0.71581	3415.63	18.6758	3443.08	9.65518	3459.75	10.6477	3459.75	10.6477	98.7247
B4-1	part 2	51	95.7264	268835	2.82315	3.3444	0.686895	29.8032	0.922246	0.725785	0.615384	0.667267	3517.69	16.6835	3480.35	9.06057	3459.59	10.6444	3459.59	10.6444	101.679
B4-1	part 2	52	245.855	616557	2.25119	3.33665	0.722287	29.6169	1.02441	0.719529	0.726433	0.709126	3494.28	19.5954	3474.19	10.0622	3463.28	11.1904	3463.28	11.1904	100.895
B4-1	part 2	53	191.404	493717	3.39688	3.34061	0.630504	29.2318	0.880929	0.712899	0.615216	0.698371	3469.38	16.506	3461.33	8.64914	3457.35	9.77138	3457.35	9.77138	100.348
B4-1	part 2	56	122.835	350881	2.7358	3.33762	0.664566	30.4166	0.907709	0.741146	0.618239	0.681098	3574.82	16.9646	3500.37	8.92358	3458.71	10.2994	3458.71	10.2994	103.357
B4-1	part 2	57	244.785	663120	2.08981	3.37653	0.728597	28.623	1.06616	0.707395	0.778347	0.73005	3448.63	20.7884	3440.68	10.4605	3436.72	11.3157	3436.72	11.3157	100.347
B4-1	part 2	58	191.767	437529	1.53178	3.74406	0.820852	24.2966	1.14389	0.66586	0.796629	0.696422	3289.87	20.5268	3280.37	11.1561	3275.23	12.901	3275.23	12.901	100.447
B4-1	part 2	60	173.486	442286	2.64513	3.34236	0.745252	29.1457	1.02249	0.712894	0.700062	0.684661	3469.36	18.7824	3458.44	10.0382	3452.79	11.5543	3452.79	11.5543	100.48
B4-1	part 2	62	263.487	216395	2.62535	3.35983	0.633076	29.0609	0.880371	0.714438	0.611699	0.694819	3475.17	16.4323	3455.58	8.64198	3444.91	9.82705	3444.91	9.82705	100.878
B4-1	part 2	63	265.534	152083	2.74857	3.71256	0.708676	24.0003	1.06881	0.652038	0.799918	0.748422	3236.16	20.3525	3268.4	10.4187	3288.91	11.1333	3288.91	11.1333	98.396
B4-1	part 2	64	135.582	375485	2.70142	3.34442	0.692273	29.346	0.928354	0.713116	0.618502	0.666235	3470.2	16.5972	3465.16	9.11596	3462.91	10.726	3462.91	10.726	100.21
B4-1	part 2	66	282.688	740540	2.27583	3.35178	0.784321	28.7797	1.05758	0.700867	0.709449	0.670822	3423.94	18.8454	3446.04	10.3783	3459.58	12.155	3459.58	12.155	98.9698
B4-1	part 2	67	153.592	430012	2.84745	3.34455	0.659014	29.0934	0.964387	0.707	0.70408	0.73008	3447.14	18.7987	3456.68	9.46711	3462.87	10.21	3462.87	10.21	99.5459
B4-1	part 2	69	171.843	511758	2.76939	3.34717	0.701506	29.735	0.975642	0.724302	0.678053	0.694982	3512.15	18.3607	3478.1	9.58446	3459.21	10.8712	3459.21	10.8712	101.53
B4-1	part 2	70	161.762	445776	1.70821	3.35061	0.733246	29.5764	1.03346	0.721189	0.72827	0.704692	3500.5	19.6713	3472.84	10.1507	3457.6	11.3646	3457.6	11.3646	101.241
B4-1	part 2	71	157.875	465061	2.79326	3.33705	0.974402	29.5525	1.35064	0.717687	0.935278	0.692469	3487.37	25.1914	3472.05	13.2661	3463.88	15.0982	3463.88	15.0982	100.678
B4-1	part 2	72	287.468	33575.4	2.34421	3.48305	0.860317	26.5958	1.23003	0.674797	0.87431	0.710806	3324.36	22.7089	3368.7	12.0375	3395.86	13.4724	3395.86	13.4724	97.8947
B4-1	part 2	73	106.751	244546	2.65196	3.34651	0.77827	29.5301	1.04695	0.71992	0.700202	0.6688	3495.75	18.8938	3471.3	10.2827	3457.9	12.0637	3457.9	12.0637	101.094
B4-1	part 2	75	229.281	578064	3.41747	3.38024	0.70943	28.7026	1.06177	0.706745	0.789969	0.744009	3446.18	21.0875	3443.4	10.4185	3442.46	11.0133	3442.46	11.0133	100.108
B4-1	part 2	76	136.013	425391	1.90004	3.34193	0.673759	29.7375	0.908633	0.723943	0.609623	0.670923	3510.81	16.503	3478.18	8.92618	3460.11	10.4405	3460.11	10.4405	101.465
B4-1	part 2	77	262.325	379715	2.688	3.87518	0.72031	22.4138	1.17045	0.632735	0.922552	0.788201	3160.4	23.0471	3201.83	11.3775	3228.57	11.3667	3228.57	11.3667	97.8885
B4-1	part 2	78	231.987	628682	2.25977	3.33814	0.677808	29.9437	0.916532	0.728117	0.616924	0.673107	3526.4	16.7563	3484.97	9.0058	3461.9	10.5019	3461.9	10.5019	101.863
B4-1	part 2	79	250.65	695409	2.7669	3.36327	0.703924	28.8467	1.01776	0.706719	0.735065	0.722235	3446.08	19.6214	3448.32	9.98828	3450.29	10.9212	3450.29	10.9212	99.878
B4-1	part 2	80	134.829	376799	2.52227	3.35056	0.895139	29.7195	1.2445	0.725379	0.864584	0.694723	3516.17	23.4319	3477.58	12.2257	3456.1	13.8766	3456.1	13.8766	101.738
B4-1	part 2	82	201.319	197745	2.62495	3.44203	0.584432	27.7842	0.912382	0.696717	0.700596	0.767876	3408.19	18.5453	3411.51	8.94256	3414.13	9.09318	3414.13	9.09318	99.826
B4-1	part 2	83	172.888	627892	2.16612	3.33072	0.750916	29.4419	1.00822	0.714752	0.672771	0.667283	3476.35	18.0776	3468.36	9.90136	3464.42	11.6335	3464.42	11.6335	100.344
B4-1	part 2	85	156.174	428707	3.15471	3.35517	0.743553	29.1773	1.06698	0.712644	0.765221	0.717183	3468.42	20.5264	3459.5	10.4753	3455.01	11.5264	3455.01	11.5264	100.388
B4-1	part 2	86	156.13	412645	2.74404	3.33854	0.656798	29.0142	0.918011	0.705149	0.641352	0.698632	3440.15	17.0976	3454	9.011	3462.7	10.1759	3462.7	10.1759	99.3487
B4-1	part 2	87	202.354	482859	2.9076	3.35186	1.18679	29.4029	1.68814	0.717439	1.20055	0.711165	3486.44	32.3299	3467.06	16.5788	3456.56	18.4	3456.56	18.4	100.865
B4-1	part 2	89	116.807	327653	2.58208	3.46184	0.77336	27.2349	1.04181	0.687673	0.698036	0.670021	3373.74	18.3354	3391.95	10.2041	3403.38	12.0359	3403.38	12.0359	99.1289
B4-1	part 2	90	219.613	666284	3.18183	3.36101	0.675852	29.5537	0.946205	0.72303	0.6622	0.699849	3507.39	17.9132	3472.09	9.29342	3452.45	10.4781	3452.45	10.4781	101.591
B4-1	part 2	91	201.509	702152	2.2079	3.34606	1.12903	29.2985	1.61091	0.714457	1.14904	0.713288	3475.24	30.8678	3463.57	15.8183	3457.5	17.5028	3457.5	17.5028	100.513
B4-1	part 2	92	174.272	451655	4.0123	3.38607	0.717209	28.7507	1.014	0.708701	0.716794	0.7069	3453.56	19.1651	3445.04	9.95019	3440.77	11.1354	3440.77	11.1354	100.372
B4-1	part 2	93	253.624	686344	1.99773	3.34841	0.934201	28.9663	1.33462	0.706284	0.953131	0.71416	3444.44	25.4332	3452.38	13.1	3457.66	14.481	3457.66	14.481	99.6176
B4-1	part 2	95	200.857	542794	2.4625	3.52062	0.611772	26.7789	0.919871	0.686292	0.686934	0.746773	3368.46	18.0223	3375.41	9.00421	3380.22	9.54126	3380.22	9.54126	99.6521
B4-1	part 2	96	200.471	435489	2.63786	3.41353	0.901772	27.4466	1.53035	0.682017	1.23643	0.80794	3352.09	32.3189	3399.53	14.9938	3428.28	14.0146	3428.28	14.0146	97.7777
B4-1	part 2	97	264.318	752291	1.94816	3.35067	0.727653	29.2091	1.04822	0.712422	0.754513	0.719802	3467.58	20.2355	3460.57	10.2915	3457.18	11.2781	3457.18	11.2781	100.301
B4-1	part 2	98	216.775	682313	1.85639	3.37809	0.689448	29.2142	1.09403	0.719092	0.849444	0.776434	3492.64	22.9055	3460.74	10.7414	3443	10.7026	3443	10.7026	101.442
B4-1	part 2	99	222.813	606462	1.69272	3.34979	0.671578	29.0197	0.981356	0.708325	0.715565	0.729159	3452.14	19.1263	3454.18	9.63288	3456.04	10.4092	3456.04	10.4092	99.8871
B4-1	part 2	100	116.412	273397	4.96358	3.88438	0.738081	24.066	1.57238	0.681218	1.38837	0.88297	3349.03	36.2651	3271.07	15.3299	3224.3	11.6467	3224.3	11.6467	103.869
BS-1	part 1	1	267.057	3.26156e+06	3.163	3.74247	0.849881	21.1611	1.39252	0.581678	1.1031	0.792158	2955.59	26.1517	3146	13.5022	3270.51	13.3615	3270.51	13.3615	90.3711
BS-1	part 1	3	404.564	5.24864e+07	1.73732	3.73982	0.594035	23.6207	0.831508	0.648703	0.581832	0.699731	3223.13	14.7577	3252.87	8.10024	3271.93	9.3365	3271.93	9.3365	98.5086
BS-1	part 1	7	116.191	2.0056e+07	1.65705	3.41271	0.778259	27.2639	1.07731	0.683265	0.744921	0.691465	3356.88	19.4925	3392.99	10.5522	3415.05	12.1074	3415.05	12.1074	98.2965
BS-1	part 1	9	223.804	3.12092e+07	1.27591	3.80525	0.7076	23.0924	0.976019	0.645289	0.672247	0.688764	3209.77	16.9965	3230.85	9.49926	3244.63	11.1514	3244.63	11.1514	98.9258
BS-1	part 1	11	463.153	3.58732e+07	1.39476	3.75429	1.0256	23.9438	1.63363	0.655409	1.27158	0.778374	3249.3	32.4543	3266.11	15.9239	3277.11	16.1173	3277.11	16.1173	99.1515
BS-1	part 1	13	291.735	2.85025e+07	2.06567	3.41744	0.691893	28.7963	1.00563	0.719656	0.729783	0.725695	3494.76	19.6878	3446.6	9.86865	3419.39	10.76	3419.39	10.76	102.204
BS-1	part 1	18	280.224	8.1506e+06	1.63814	3.34974	0.736958	28.4931	1.44112	0.695415	1.23844	0.859356	3403.24	32.7464	3436.22	14.1377	3456.17	11.4231	3456.17	11.4231	98.4686
BS-1	part 1	20	219.676	3.3361e+07	1.07118	3.37015	0.738299	28.3597	1.0101	0.696527	0.689359	0.682467	3407.47	18.2449	3431.61	9.90736	3446.41	11.4578	3446.41	11.4578	98.87
BS-1	part 1	21	400.354	2.02669e+07	1.64441	3.75743	0.896019	22.5495	2.16836	0.617469	1.97458	0.91063	3099.84	48.5936	3207.7	21.0853	3276.54	14.0809	3276.54	14.0809	94.6072
BS-1	part 1	22	319.125	1.24484e+07	1.57253	3.81095	0.823813	23.6073	1.68458	0.655643	1.4694	0.872266	3250.22	37.5114	3252.32	16.4112	3254.29	12.9728	3254.29	12.9728	99.8748
BS-1	part 1	24	257.992	3.48633e+07	1.59261	3.37841	0.905606	27.4444	1.29245	0.67804	0.922115	0.713465	3336.84	24.0192	3399.45	12.6626	3437.24	14.0643	3437.24	14.0643	97.079
BS-1	part 1	26	424.843	8.20903e+06	1.36217	3.73489	0.639931	23.6432	0.888512	0.645765	0.616394	0.693737	3211.64	15.5914	3253.8	8.65591	3280.55	10.052	3280.55	10.052	97.8994
BS-1	part 1	27	379.321	5.44933e+07	1.48867	3.73647	0.686394	23.4557	1.02096	0.640913	0.755798	0.740279	3192.61	19.03	3246.04	9.94312	3279.89	10.7827	3279.89	10.7827	97.3388
BS-1	part 1	29	325.038	9.36693e+06	1.41073	3.72711	0.594709	23.7716	1.00099	0.647649	0.805174	0.804377	3219.01	20.4025	3259.07	9.75389	3284.48	9.34381	3284.48	9.34381	98.0067
BS-1	part 1	30	323.668	2.74978e+07	2.14435	3.43341	0.752146	24.6626	1.17296	0.618975	0.900059	0.767341	3105.84	22.1832	3294.95	11.4464	3412.78	11.7032	3412.78	11.7032	91.0061
BS-1	part 1	31	433.641	2.68767e+07	1.48727	3.5038	0.798842	24.9439	1.40272	0.638867	1.15303	0.821995	3184.56	28.9753	3306.02	13.6948	3381.19	12.4577	3381.19	12.4577	94.1848
BS-1	part 1	32	249.672	3.26942e+07	1.66499	3.74007	0.761447	23.6082	1.09556	0.645432	0.787689	0.718982	3210.33	19.918	3252.35	10.6725	3279.03	11.9631	3279.03	11.9631	97.9049
BS-1	part 1	33	476.364	1.24221e+07	1.73959	3.26039	0.893869	28.6918	1.28833	0.683811	0.927784	0.720146	3358.97	24.289	3443.03	12.6415	3492.98	13.8261	3492.98	13.8261	96.1633
BS-1	part 1	37	383.859	5.88584e+06	1.69312	3.52545	0.884753	23.5872	1.56025	0.605943	1.28515	0.823678	3053.74	31.259	3251.48	15.1993	3376.49	13.8025	3376.49	13.8025	90.4413
BS-1	part 1	38	157.985	1.23238e+07	1.09859	3.39433	0.661007	27.5727	0.904188	0.68198	0.616949	0.682323	3351.95	16.1257	3404.02	8.85988	3435.48	10.2669	3435.48	10.2669	97.5687
BS-1	part 1	39	340.16	4.64107e+07	1.21079	3.73773	0.659833	23.6199	0.948249	0.64304	0.681027	0.718194	3200.95	17.182	3252.84	9.23754	3285.65	10.3661	3285.65	10.3661	97.4224
BS-1	part 1	40	355.466	4.02319e+07	1.72775	3.73529	0.686666	23.51	0.981122	0.639629	0.700778	0.714262	3187.56	17.6231	3248.29	9.55598	3286.67	10.7867	3286.67	10.7867	96.9843
BS-1	part 1	43	316.784	4.04152e+07	1.46895	3.7358	0.65851	23.6814	0.897573	0.644381	0.609921	0.679522	3206.21	15.4075	3255.37	8.74477	3286.46	10.3446	3286.46	10.3446	97.5583
BS-1	part 1	44	242.171	6.58826e+06	2.18532	3.72554	0.604827	23.8308	0.927533	0.645504	0.703208	0.758149	3210.62	17.7829	3261.5	9.03896	3293.6	9.4958	3293.6	9.4958	97.4805
BS-1	part 1	47	389.798	4.56169e+07	1.58342	3.73828	0.734159	23.6786	1.03858	0.642398	0.734608	0.707323	3198.44	18.5226	3255.25	10.1185	3291.11	11.5287	3291.11	11.5287	97.1841
BS-1	part 1	50	331.896	4.12006e+07	1.69883	3.73862	0.799211	23.8456	1.09932	0.646992	0.754824	0.68663	3216.44	19.1149	3262.1	10.7134	3290.96	12.5504	3290.96	12.5504	97.7358
BS-1	part 1	51	270.707	3.49554e+07	1.79305	3.42742	0.619815	26.5423	1.14899	0.657828	0.967479	0.842023	3258.72	24.7477	3366.73	11.2436	3432.33	9.62937	3432.33	9.62937	94.9418
BS-1	part 1	52	369.274	7.85905e+06	2.33508	3.73212	0.850893	25.0486	1.26042	0.676001	0.929859	0.737738	3329	24.1775	3310.11	12.3074	3299.37	13.353	3299.37	13.353	100.898
BS-1	part 1	53	264.249	1.01179e+07	3.30355	3.444	0.686786	26.5631	1.12114	0.661107	0.886161	0.79041	3271.46	22.7356	3367.5	10.9713	3425.82	10.6753	3425.82	10.6753	95.494
BS-1	part 1	54	335.282	1.49896e+07	1.85735	3.73173	0.603938	23.9163	0.980113	0.644963	0.771933	0.787596	3208.49	19.5109	3264.99	9.55277	3300.54	9.47656	3300.54	9.47656	97.2112
BS-1	part 1	55	346.716	4.9446e+07	1.43005	3.38426	0.69345	28.2027	1.13112	0.689735	0.893617	0.790031	3381.61	23.5145	3426.17	11.0923	3453	10.7504	3453	10.7504	97.9325
BS-1	part 1	57	314.872	2.44383e+07	2.09607	3.35617	0.621468	28.1287	0.886482	0.681985	0.632161	0.713112	3351.97	16.5234	3423.59	8.69239	3466.43	9.62559	3466.43	9.62559	96.6981
BS-1	part 1	60	344.389	3.15721e+07	3.19428	3.73437	0.80202	23.6353	1.10097	0.638446	0.754254	0.685081	3182.9	18.9465	3253.47	10.7257	3297.93	12.5875	3297.93	12.5875	96.5122
BS-1	part 1	62	364.489	1.70085e+07	3.79918	3.73896	0.722264	23.463	1.11339	0.635281	0.847335	0.761039	3170.44	21.2202	3246.35	10.8435	3294.25	11.339	3294.25	11.339	96.2417
BS-1	part 1	63	167.782	2.78838e+07	1.17821	3.39754	0.740977	28.9287	1.06474	0.711743	0.764607	0.718116	3465.03	20.4947	3451.1	10.4503	3443.7	11.5017	3443.7	11.5017	100.619
BS-1	part 1	64	415.336	5.40826e+07	1.71333	3.74009	0.695422	23.8902	0.971614	0.646896	0.678545	0.698369	3216.07	17.1817	3263.92	9.46952	3294.13	10.9177	3294.13	10.9177	97.6303
BS-1	part 1	65	438.587	4.41057e+07	2.26592	3.81508	0.660869	22.9468	1.00653	0.633809	0.759184	0.754256	3164.63	18.9856	3224.69	9.79368	3262.93	10.3996	3262.93	10.3996	96.9874
BS-1	part 1	66	423.425	3.2163e+07	1.31095	3.42019	0.679635	25.5091	1.6943	0.631652	1.55202	0.916021	3156.12	38.732	3327.9	16.5562	3433.73	10.5576	3433.73	10.5576	91.9152
BS-1	part 1	67	426.987	6.00765e+07	2.17484	3.25326	0.725179	29.9025	1.00373	0.704302	0.693964	0.691386	3436.94	18.4871	3483.61	9.86219	3511.23	11.2012	3511.23	11.2012	97.8843
BS-1	part 1	68	385.74	4.2904e+07	2.31389	3.75218	0.799058	24.5062	1.31667	0.664713	1.04648	0.794795	3285.43	26.9369	3288.75	12.8458	3291.44	12.5475	3291.44	12.5475	99.8174
BS-1	part 1	69	234.516	2.6986e+07	2.53354	3.3755	0.757709	27.8481	1.08578	0.679527	0.777681	0.716244	3342.54	20.2834	3413.76	10.643	3456.5	11.7447	3456.5	11.7447	96.7032
BS-1	part 1	72	171.873	1.89875e+07	2.78794	3.41946	0.792643	25.5857	1.19012	0.632453	0.887746	0.745933	3159.28	22.1716	3330.84	11.6302	3436.42	12.3106	3436.42	12.3106	91.9354
BS-1	part 1	73	384.674	2.05905e+07	1.28882	3.75171	0.759229	23.8742	1.53974	0.646444	1.33955	0.869979	3214.3	33.905	3263.27	15.0069	3294.17	11.9194	3294.17	11.9194	97.5754
BS-1	part 1	74	373.126	3.41664e+06	2.51961	3.72242	0.680257	24.241	1.23616	0.651861	1.03215	0.834967	3235.47	26.257	3278.14	12.055	3305.01	10.6703	3305.01	10.6703	97.8961
BS-1	part 1	75	313.599	3.92302e+07	1.1729	3.35053	0.628315	28.6951	0.93948	0.694535	0.698458	0.743452	3399.89	18.4545	3443.14	9.21833	3469.07	9.73005	3469.07	9.73005	98.006
BS-1	part 1	76	437.842	2.49054e+07	1.18815	3.40089	0.729535	26.9127	1.05954	0.661186	0.768379	0.7252	3271.76	19.7152	3380.29	10.3733	3445.94	11.3222	3445.94	11.3222	94.9453
BS-1	part 1	78	345.586	3.12556e+07	1.58899	3.73491	0.596276	23.7917	0.939372	0.643075	0.725861	0.772709	3201.09	18.3137	3259.9	9.15374	3296.94	9.35903	3296.94	9.35903	97.0928
BS-1	part 1	79	365.707	1.57183e+07	0.954871	3.84155	0.642882	21.0118	1.15165	0.584153	0.955513	0.829689	2965.67	22.7136	3139.14	11.1629	3252.69	10.1248	3252.69	10.1248	91.176
BS-1	part 1	80	275.2	1.17146e+07	1.03113	3.39914	0.762243	25.7786	1.10547	0.634138	0.800657	0.724268	3165.94	20.0291	3338.18	10.806	3443.95	11.8316	3443.95	11.8316	91.9276
BS-1	part 1	81	357.47	4.9565e+07	1.87189	3.74186	0.659705	23.738	0.925766	0.642818	0.649485	0.701565	3200.08	16.3828	3257.7	9.02032	3294.02	10.3571	3294.02	10.3571	97.1481
BS-1	part 1	82	458.631	6.68797e+07	1.69504	3.74102	0.66983	23.6326	0.918897	0.639821	0.629046	0.684566	3188.31	15.8221	3253.36	8.95177	3294.37	10.5157	3294.37	10.5157	96.7805
BS-1	part 1	91	411.343	9.91069e+06	1.76916	3.49082	0.736774	26.9779	1.46098	0.683886	1.26159	0.863527	3359.25	33.0303	3382.66	14.3052	3397.23	11.4708	3397.23	11.4708	98.8821
BS-1	part 1	92	405.583	9.92544e+06	0.842459	3.43382	0.768335	27.4118	1.41932	0.683636	1.19337	0.840803	3358.3	31.2372	3398.29	13.9051	3422.62	11.9459	3422.62	11.9459	98.1206
BS-1	part 1	93	485.313	7.98297e+06	6.71479	3.49968	0.841131	25.5718	1.21268	0.649979	0.873551	0.720347	3228.12	22.1835	3330.3	11.8505	3393.06	13.1002	3393.06	13.1002	95.1391
BS-1	part 1	96	133.098	1.77098e+07	1.89685	3.79275	0.809048	22.7753	1.16674	0.627376	0.840665	0.720527	3139.2	20.8921	3217.39	11.349	3267.18	12.7224	3267.18	12.7224	96.0829
BS-1	part 1	97	225.245	8.66779e+06	0.964276	3.3459	0.736253	28.141	1.08428	0.683853	0.795992	0.734118	3359.13	20.8395	3424.02	10.6322	3462.87	11.4072	3462.87	11.4072	97.004
BS-1	part 1	98	354.098	4.54528e+07	1.83383	3.73349	0.701803	23.5319	1.02894	0.638087	0.752456	0.731292	3181.49	18.8949	3249.2	10.0221	3291.92	11.0199	3291.92	11.0199	96.6454
BS-1	part 1	100	449.104	1.7011e+07	2.68629	3.52855	0.721414	24.3734	1.45456	0.625067	1.26306	0.868342	3130.05	31.3184	3283.44	14.1882	3379.16	11.2519	3379.16	11.2519	92.6281
BS-1	part 2	1	176.111	43316.5	3.64106	3.74376	0.744621	24.9139	1.08455	0.679519	0.784628	0.723462	3342.51	20.4644	3304.85	10.5877	3282.75	11.76	3282.75	11.76	101.82
BS-1	part 2	2	407.928	21120.8	2.16667	3.62542	0.733819	24.4104	1.728	0.645312	1.55908	0.902248	3209.86	39.4198	3284.92	16.8569	3331.73	11.6587	3331.73	11.6587	96.3422
BS-1	part 2	3	243.066	56909.7	2.58871	3.37746	0.560666	28.5864	0.842459	0.702144	0.626777	0.743986	3428.77	16.6672	3439.42	8.26524	3446.3	8.73618	3446.3	8.73618	99.4914
BS-1	part 2	4	406.771	93216.7	2.66139	3.73902	0.719485	23.9824	0.989071	0.652012	0.678438	0.685934	3236.06	17.2612	3267.68	9.64115	3287.8	11.3048	3287.8	11.3048	98.4263
BS-1	part 2	5	543.698	15703.3	3.5451	3.84356	0.809489	22.288	1.22057	0.624253	0.911272	0.746592	3126.82	22.5774	3196.36	11.8619	3240.98	12.8009	3240.98	12.8009	96.4775
BS-1	part 2	6	180.811	44089.1	2.2415	3.37541	0.894532	28.3532	1.10813	0.696113	0.649956	0.586535	3405.89	17.196	3431.39	10.8688	3446.98	13.928	3446.98	13.928	98.8082
BS-1	part 2	10	372.948	85963.8	2.57466	3.73699	0.798257	23.7535	1.11965	0.645462	0.784729	0.700867	3210.45	19.8437	3258.33	10.9099	3288.6	12.5438	3288.6	12.5438	97.6236
BS-1	part 2	12	180.132	40608.8	4.11574	3.71692	0.675332	24.1233	0.946635	0.648489	0.660857	0.698112	3222.3	16.7588	3273.39	9.22963	3305.51	10.631	3305.51	10.631	97.4827
BS-1	part 2	13	399.75	70607.1	2.4036	3.773	1.04659	21.9066	1.51507	0.597556	1.09417	0.72219	3019.98	26.3832	3179.6	14.7132	3282.6	16.4622	3282.6	16.4622	91.9998
BS-1	part 2	14	500.917	83791.2	2.87832	3.75006	0.740014	23.4715	1.17817	0.636286	0.91591	0.777403	3174.4	22.9597	3246.7	11.4745	3292.33	11.6361	3292.33	11.6361	96.4181
BS-1	part 2	15	498.577	86950.9	1.46702	3.37715	0.706731	27.4337	0.989152	0.669686	0.691703	0.699289	3304.66	17.8844	3399.07	9.69075	3455.87	10.96	3455.87	10.96	95.6246
BS-1	part 2	16	270.85	14655.7	2.84165	3.47134	0.785253	24.5744	1.80176	0.617887	1.60985	0.893491	3101.51	39.6343	3291.46	17.5811	3409.95	12.5869	3409.95	12.5869	90.9547
BS-1	part 2	17	537.026	123038	1.73029	3.73598	0.854852	23.4136	1.24475	0.632239	0.904382	0.726559	3158.44	22.5824	3244.29	12.1218	3298.47	13.4227	3298.47	13.4227	95.7545
BS-1	part 2	19	387.659	96865.1	2.25197	3.7419	0.669448	23.5422	0.934347	0.636771	0.651425	0.697198	3176.31	16.3373	3249.63	9.10088	3295.86	10.5142	3295.86	10.5142	96.373
BS-1	part 2	21	110.684	30140.8	1.73968	3.37775	0.75474	28.0905	1.12864	0.686334	0.8344	0.739296	3368.62	21.892	3422.26	11.0665	3454.48	11.7818	3454.48	11.7818	97.5145
BS-1	part 2	22	574.823	55533.1	1.70864	3.45064	0.723452	26.5972	1.38985	0.663555	1.18526	0.852795	3280.95	30.4772	3368.75	13.6018	3422.07	11.2857	3422.07	11.2857	95.876
BS-1	part 2	24	365.494	42685.1	1.33477	3.39111	0.647012	26.0211	1.04159	0.638096	0.815066	0.782524	3181.53	20.4672	3347.33	10.185	3448.83	10.0625	3448.83	10.0625	92.2496
BS-1	part 2	25	164.774	36727.2	3.32514	3.7333	0.67811	22.977	0.941335	0.620469	0.652698	0.693375	3111.79	16.1106	3225.97	9.15976	3298.42	10.6453	3298.42	10.6453	94.3418
BS-1	part 2	27	583.955	28414.5	2.08647	3.85049	0.764283	21	1.35108	0.585113	1.11376	0.824349	2969.58	26.5029	3138.59	13.0958	3249.22	12.0487	3249.22	12.0487	91.3937
BS-1	part 2	30	377.86	19100	1.95049	3.79663	0.801662	21.9435	1.32863	0.610711	1.05824	0.796484	3072.85	25.8655	3181.23	12.9034	3250.99	12.6542	3250.99	12.6542	94.5203
BS-1	part 2	32	415.593	93989	1.49769	3.74457	0.698654	22.9178	1.06373	0.628013	0.801929	0.753883	3141.73	19.9419	3223.46	10.3497	3275.38	10.9826	3275.38	10.9826	95.9195
BS-1	part 2	34	309.689	79753.7	1.77262	3.73948	0.769189	24.1947	1.19201	0.660395	0.910542	0.763869	3268.69	23.346	3276.27	11.6236	3281.58	12.0841	3281.58	12.0841	99.6071
BS-1	part 2	35	422.974	102541	1.0763	3.38145	0.776345	27.9904	1.31496	0.690738	1.06103	0.806892	3385.43	27.9438	3418.76	12.892	3439.02	12.0613	3439.02	12.0613	98.4418
BS-1	part 2	36	433.247	98074.6	2.04191	3.74015	0.808391	23.0594	1.15184	0.629465	0.820298	0.712162	3147.47	20.4276	3229.45	11.21	3281.44	12.7021	3281.44	12.7021	95.9175
BS-1	part 2	37	531.474	11657.5	1.85664	3.48685	0.754384	25.3813	1.61867	0.647638	1.43135	0.884273	3218.97	36.2693	3323	15.814	3387.03	11.7822	3387.03	11.7822	95.038
BS-1	part 2	38	354.479	30238.1	1.072	3.41636	0.766294	26.2786	1.3203	0.655723	1.07126	0.811375	3250.53	27.3495	3356.96	12.9154	3421.79	11.9998	3421.79	11.9998	94.9948
BS-1	part 2	39	437.246	101130	1.7021	3.74003	1.10971	23.2135	1.58806	0.634829	1.13588	0.715263	3168.66	28.434	3235.93	15.4601	3278.57	17.4395	3278.57	17.4395	96.6478
BS-1	part 2	40	156.238	8220.07	0.532505	3.77357	0.802597	22.8755	1.2859	0.634015	0.970121	0.754428	3165.45	24.2655	3221.66	12.5106	3257.53	13.2879	3257.53	13.2879	97.1734
BS-1	part 2	41	222.601	43888	2.98298	3.38725	0.739201	26.0477	1.25484	0.645398	1.01218	0.806624	3210.2	25.5939	3348.33	12.271	3432.75	11.5226	3432.75	11.5226	93.517
BS-1	part 2	43	363.454	94343	2.07788	3.73591	0.692938	23.0197	0.961249	0.630276	0.665594	0.692427	3150.68	16.5882	3227.77	9.35427	3276.7	10.8974	3276.7	10.8974	96.154
BS-1	part 2	44	403.261	103095	1.7369	3.73979	0.734503	23.1358	1.02403	0.634091	0.713216	0.696482	3165.75	17.8409	3232.67	9.9673	3275.13	11.5478	3275.13	11.5478	96.6604
BS-1	part 2	45	590.565	22098.2	2.28793	3.85444	0.849383	20.363	1.22696	0.574852	0.883422	0.720011	2927.71	20.7876	3108.76	11.8757	3228.54	13.4363	3228.54	13.4363	90.6822
BS-1	part 2	46	484.743	71321	1.83687	3.73365	0.697465	23.555	1.16959	0.643258	0.938221	0.802181	3201.81	23.6758	3250.15	11.3926	3280.79	10.9697	3280.79	10.9697	97.5928
BS-1	part 2	47	315.823	82814.7	1.21949	3.40398	0.715941	26.7377	0.998183	0.665613	0.694966	0.696231	3288.92	17.9032	3373.91	9.77028	3425.45	11.1377	3425.45	11.1377	96.0142
BS-1	part 2	48	542.855	119951	3.03647	3.74175	0.667967	23.7213	0.969471	0.648851	0.702482	0.724603	3223.71	17.8204	3257.01	9.44593	3278.24	10.4969	3278.24	10.4969	98.3368
BS-1	part 2	49	591.268	136632	1.64398	3.74099	0.693712	22.8168	0.949346	0.62396	0.647989	0.682564	3125.66	16.0498	3219.16	9.23502	3278.62	10.9003	3278.62	10.9003	95.3347
BS-1	part 2	50	369.965	14441.6	1.51578	3.73896	0.594863	24.7433	1.32039	0.676905	1.16277	0.880629	3332.47	30.2577	3298.14	12.8869	3278.01	9.82875	3278.01	9.82875	101.662
BS-1	part 2	51	377.851	58929.2	0.795377	3.34353	0.729039	27.4569	0.980215	0.668487	0.654409	0.667618	3300.03	16.902	3399.9	9.60347	3459.96	11.3089	3459.96	11.3089	95.3777
BS-1	part 2	56	409.611	108301	1.4063	3.7343	0.722317	23.5328	1.05815	0.641508	0.772872	0.730401	3194.94	19.4709	3249.24	10.3066	3283.59	11.3508	3283.59	11.3508	97.3004
BS-1	part 2	57	409.273	60800.9	1.04257	3.81382	0.788914	23.3244	1.16138	0.650501	0.851654	0.733309	3230.16	21.6379	3240.58	11.3082	3247.7	12.4409	3247.7	12.4409	99.4599
BS-1	part 2	58	453.702	11540.8	1.49385	3.84483	0.77599	21.4967	1.49972	0.60571	1.26006	0.840197	3052.8	30.6414	3161.26	14.552	3231.53	12.8304	3231.53	12.8304	94.4694
BS-1	part 2	59	154.574	41712.6	0.999067	3.37111	0.85797	27.779	1.24404	0.684385	0.900585	0.72392	3361.16	23.5887	3411.33	12.1934	3441.59	13.3242	3441.59	13.3242	97.6631
BS-1	part 2	60	560.147	25849.2	1.49036	3.85825	0.875947	20.369	2.06227	0.574815	1.86585	0.904756	2927.56	43.9036	3109.04	19.9626	3229.11	13.8604	3229.11	13.8604	90.6614
BS-1	part 2	61	221.655	60552.7	1.63356	3.4043	1.06166	27.2683	1.53022	0.678255	1.10126	0.719675	3337.66	28.6911	3393.15	14.9891	3426.75	16.5137	3426.75	16.5137	97.4003
BS-1	part 2	62	299.754	77813.5	1.35537	3.7366	0.601475	23.4684	0.966449	0.639182	0.755401	0.781626	3185.8	18.9887	3246.57	9.41238	3284.99	9.47088	3284.99	9.47088	96.9804
BS-1	part 2	63	381.755	93028.2	1.48949	3.73306	0.741479	23.6728	1.01199	0.643501	0.688608	0.680452	3202.76	17.3808	3255.02	9.85937	3288.04	11.648	3288.04	11.648	97.4065
BS-1	part 2	64	160.778	34017.5	1.83641	3.36771	0.66563	28.1019	0.902678	0.689516	0.606996	0.672439	3380.77	15.9693	3422.66	8.85091	3447.93	10.3674	3447.93	10.3674	98.0521
BS-1	part 2	65	145.119	35524.8	1.10949	3.78908	1.00316	23.1	1.39841	0.637801	0.97351	0.696155	3180.37	24.4391	3231.17	13.6109	3263.53	15.7924	3263.53	15.7924	97.4518
BS-1	part 2	66	543.716	25028.8	1.4408	3.45581	0.733912	26.6773	1.41673	0.671961	1.21027	0.854275	3313.44	31.3562	3371.69	13.8663	3407.16	11.4579	3407.16	11.4579	97.2492
BS-1	part 2	67	320.465	14700.9	1.71633	3.74726	0.790596	23.0688	1.1714	0.630893	0.860767	0.734818	3153.12	21.4652	3229.85	11.4005	3278.52	12.4834	3278.52	12.4834	96.1752
BS-1	part 2	68	417.072	92955.9	2.22329	3.34856	0.597749	28.2646	0.828477	0.689137	0.572836	0.691432	3379.32	15.0657	3428.32	8.12493	3457.74	9.27509	3457.74	9.27509	97.7321
BS-1	part 2	70	99.3629	22903.1	1.83019	3.36848	0.78141	27.8733	1.0428	0.683775	0.68753	0.659309	3358.83	17.9987	3414.65	10.2221	3448.23	12.1662	3448.23	12.1662	97.4073
BS-1	part 2	71	585.455	94183.5	3.19663	3.40567	0.499458	25.622	1.63134	0.634798	1.55293	0.951936	3168.54	38.8728	3332.22	15.9434	3432.87	7.76253	3432.87	7.76253	92.2998
BS-1	part 2	73	513.166	120944	1.65779	3.74687	0.98845	23.58	1.4667	0.642708	1.08332	0.738612	3199.65	27.3233	3251.19	14.2877	3283.8	15.5302	3283.8	15.5302	97.4374
BS-1	part 2	74	105.69	26876.5	1.98738	3.41792	1.18383	26.327	1.67266	0.656385	1.18	0.705463	3253.1	30.144	3358.76	16.3638	3423.09	18.4315	3423.09	18.4315	95.0343
BS-1	part 2	75	344.579	14041.4	4.40072	3.73193	0.940819	22.0492	1.33281	0.601164	0.936029	0.702297	3034.53	22.6551	3185.9	12.9467	3283.33	14.9032	3283.33	14.9032	92.4222
BS-1	part 2	76	245.076	54717.1	2.00635	3.43144	0.714314	24.5837	1.51393	0.614955	1.33358	0.880874	3089.81	32.7359	3291.83	14.7724	3417.94	11.1459	3417.94	11.1459	90.3999
BS-1	part 2	78	340.637	78138.6	2.05664	3.73857	0.668919	23.5798	0.970512	0.642544	0.702747	0.724099	3199.01	17.7217	3251.18	9.45378	3284.19	10.5117	3284.19	10.5117	97.4062
BS-1	part 2	79	267.685	44394.2	1.95629	3.39382	0.684652	25.628	1.62047	0.634131	1.46783	0.905807	3165.9	36.719	3332.45	15.8373	3434.87	10.6645	3434.87	10.6645	92.1696
BS-1	part 2	80	261.627	73708.2	2.63483	3.742	0.721489	23.4317	1.0503	0.639113	0.763117	0.726568	3185.53	19.1814	3245.04	10.2285	3282.7	11.3347	3282.7	11.3347	97.04
BS-1	part 2	81	395.313	29799.7	4.03889	3.78546	0.721572	23.0372	1.08604	0.636161	0.801158	0.737686	3173.91	20.0807	3228.51	10.5691	3263.29	11.5329	3263.29	11.5329	97.261
BS-1	part 2	83	509.142	109115	2.55889	3.73773	0.662966	23.6585	0.895577	0.642913	0.601789	0.671956	3200.46	15.181	3254.43	8.72497	3288.52	10.4174	3288.52	10.4174	97.3221
BS-1	part 2	84	483.304	56431.8	3.19877	3.77162	0.94871	23.8163	1.4015	0.653292	1.02954	0.7346	3241.05	26.2255	3260.9	13.658	3273.81	14.9471	3273.81	14.9471	98.9994
BS-1	part 2	85	242.084	31896.5	1.04344	3.8824	0.739554	20.2294	1.71187	0.571558	1.54318	0.901458	2914.21	36.1801	3102.39	16.5648	3227.23	11.6946	3227.23	11.6946	90.3009
BS-1	part 2	86	391.238	26801.4	2.37763	3.75352	0.7774	23.0115	1.25413	0.628675	0.977218	0.779197	3144.35	24.3166	3227.43	12.2045	3280.14	12.349	3280.14	12.349	95.86
BS-1	part 2	87	393.897	10523.7	1.72257	3.44469	0.65424	26.6163	1.40968	0.668544	1.24767	0.885077	3300.25	32.2267	3369.45	13.7962	3411.54	10.2101	3411.54	10.2101	96.7379
BS-1	part 2	88	241.777	23486.2	1.97906	3.88471	0.848997	21.9741	1.21189	0.620884	0.862992	0.712106	3113.44	21.3101	3182.59	11.7702	3227.15	13.4229	3227.15	13.4229	96.4764
BS-1	part 2	89	285.739	71256.4	1.60375	3.39968	0.71099	28.6782	1.44482	0.706788	1.2575	0.87035	3446.34	33.5692	3442.57	14.1771	3441.04	11.0461	3441.04	11.0461	100.154
BS-1	part 2	90	368.821	62717.9	2.26558	3.74169	1.23766	23.9329	1.77476	0.649165	1.27094	0.716121	3224.94	32.2507	3265.66	17.2995	3291.43	19.447	3291.43	19.447	97.9798
BS-1	part 2	91	482.226	116572	2.55758	3.73634	0.868435	23.883	1.22648	0.646936	0.865958	0.70605	3216.22	21.9281	3263.63	11.9536	3293.56	13.6364	3293.56	13.6364	97.6521
BS-1	part 2	94	310.571	22100.3	1.76662	3.43667	0.715809	26.5161	1.1911	0.661501	0.94728	0.7953	3272.98	24.3125	3365.76	11.6552	3422.14	11.2268	3422.14	11.2268	95.6414
BS-1	part 2	95	578.936	40811.7	2.06099	3.76765	0.717951	23.6602	1.10921	0.646712	0.845128	0.761922	3215.35	21.3962	3254.5	10.8064	3279.38	11.2862	3279.38	11.2862	98.0476
BS-1	part 2	96	570.155	77377.4	16.3466	3.36908	0.863431	28.0854	1.21524	0.686093	0.854587	0.703223	3367.7	22.417	3422.08	11.9157	3454.75	13.3948	3454.75	13.3948	97.4803
BS-1	part 2	97	513.902	25135.4	1.59074	3.46154	0.791151	27.7058	1.40429	0.696045	1.15698	0.82389	3405.63	30.6088	3408.74	13.763	3411.23	12.3795	3411.23	12.3795	99.8358
BS-1	part 2	100	353.872	82142.5	1.51347	3.36297	0.69578	28.085	0.95161	0.683923	0.648869	0.681865	3359.4	16.9887	3422.07	9.33053	3459.63	10.7867	3459.63	10.7867	97.1027
BS-3	part 1	1	447.982	100851	1.54786	3.74966	0.633133	24.7238	1.03839	0.675272	0.822917	0.792497	3326.19	21.383	3297.37	10.134	3280.57	9.9476	3280.57	9.9476	101.391
BS-3	part 1	5	273.546	16825.2	1.78359	3.5227	0.658155	27.4065	1.13635	0.704006	0.925669	0.8146	3435.82	24.6537	3398.1	11.1325	3376.6	10.2822	3376.6	10.2822	101.754
BS-3	part 1	9	440.953	11857.2	2.1761	3.64216	1.28869	24.7553	1.73441	0.658015	1.15202	0.664216	3259.44	29.4733	3298.61	16.9287	3323.18	20.3039	3323.18	20.3039	98.0822
BS-3	part 1	10	328.069	44415.3	1.63003	3.35291	0.758935	28.3581	1.18664	0.692239	0.911401	0.76805	3391.15	24.0339	3431.56	11.6391	3455.9	11.7793	3455.9	11.7793	98.1265
BS-3	part 1	11	381.658	8674.26	0.958914	4.08627	0.768102	20.6526	1.40309	0.617248	1.17367	0.836492	3098.96	28.8769	3122.43	13.5896	3138.24	12.22	3138.24	12.22	98.7484
BS-3	part 1	12	224.905	69814.5	1.60716	3.2423	0.73444	32.248	1.08399	0.759289	0.796264	0.734571	3641.64	22.1537	3557.9	10.676	3511.75	11.3605	3511.75	11.3605	103.699
BS-3	part 1	13	283.679	5727.93	2.13818	3.8837	0.758727	22.3096	1.37199	0.634762	1.09108	0.795254	3168.39	27.3108	3197.3	13.3341	3216.17	13.1337	3216.17	13.1337	98.5146
BS-3	part 1	16	455.389	26671.6	3.27786	3.75403	0.786408	24.5015	1.1182	0.669973	0.791819	0.708118	3305.77	20.4783	3288.56	10.9092	3278.75	12.4052	3278.75	12.4052	100.824
BS-3	part 1	18	290.022	87638.1	2.6409	3.74127	0.694752	24.9574	0.943216	0.679429	0.637618	0.676004	3342.17	16.6288	3306.55	9.20855	3285.7	10.9194	3285.7	10.9194	101.719
BS-3	part 1	19	331.69	38294	2.25764	3.78564	0.729874	23.9576	1.46834	0.663646	1.27275	0.866795	3281.3	32.7296	3266.67	14.3129	3258.38	11.5264	3258.38	11.5264	100.703
BS-3	part 1	20	436.225	116532	2.50877	3.74199	0.878213	24.986	1.23896	0.683677	0.873391	0.704938	3358.45	22.8623	3307.67	12.0967	3277.71	13.8083	3277.71	13.8083	102.463
BS-3	part 1	21	263.502	74033.8	2.88858	3.7433	0.991495	25.0166	1.42266	0.684882	1.02002	0.716983	3363.07	26.7286	3308.87	13.891	3276.86	15.585	3276.86	15.585	102.631
BS-3	part 1	22	403.235	113386	1.95879	3.7381	0.677687	24.9952	0.942844	0.683223	0.655424	0.695156	3356.71	17.1499	3308.03	9.20545	3279.33	10.6477	3279.33	10.6477	102.36
BS-3	part 1	23	44.337	15231.4	1.95198	3.39286	1.05498	30.0483	1.35816	0.746824	0.846942	0.623597	3595.8	23.3422	3488.39	13.3471	3427.95	16.501	3427.95	16.501	104.897
BS-3	part 1	24	310.943	82454.5	3.3099	3.73902	0.690543	24.9501	0.998875	0.681394	0.721535	0.722348	3349.71	18.8498	3306.27	9.75187	3280.7	10.8506	3280.7	10.8506	102.103
BS-3	part 1	25	223.756	69682.1	2.06361	3.33743	0.820616	29.1732	1.20107	0.711155	0.876335	0.729631	3462.81	23.4782	3459.36	11.7918	3458.04	12.7303	3458.04	12.7303	100.138
BS-3	part 1	26	122.589	24402.8	3.49696	3.79468	0.931594	23.0787	1.55524	0.640416	1.23614	0.794823	3190.65	31.1099	3230.27	15.1369	3255.63	14.8605	3255.63	14.8605	98.004
BS-3	part 1	27	358.733	100406	2.85029	3.73672	0.702667	25.0955	0.983728	0.684884	0.687835	0.699212	3363.07	18.024	3311.94	9.60612	3281.8	11.0466	3281.8	11.0466	102.476
BS-3	part 1	28	308.924	33977.4	1.16082	3.40247	0.773458	29.2055	1.20984	0.728002	0.929778	0.768512	3525.97	25.2516	3460.45	11.8784	3423.41	12.0347	3423.41	12.0347	102.996
BS-3	part 1	31	148.056	41222.9	1.69408	3.73475	1.39088	24.1497	1.94377	0.660746	1.35747	0.698371	3270.05	34.8164	3274.46	18.9541	3277.82	21.8642	3277.82	21.8642	99.7629
BS-3	part 1	33	373.757	102127	2.72558	3.73431	0.684706	24.2852	0.96651	0.665495	0.681644	0.705263	3288.46	17.5581	3279.91	9.42593	3275.35	10.7676	3275.35	10.7676	100.4
BS-3	part 1	34	224.922	16190.9	2.7612	3.49662	1.03465	26.805	1.47674	0.687472	1.04781	0.70954	3372.97	27.5182	3376.37	14.4563	3379.06	16.2308	3379.06	16.2308	99.8198
BS-3	part 1	39	197.867	26173.3	2.41497	3.42769	0.795799	28.474	1.46518	0.714584	1.22797	0.838106	3475.71	32.9918	3435.56	14.3734	3412.89	12.4363	3412.89	12.4363	101.841
BS-3	part 1	40	220.112	64114.3	3.22126	3.74018	0.686105	24.5371	0.943398	0.671464	0.646721	0.685523	3311.52	16.748	3289.97	9.20425	3277.54	10.7916	3277.54	10.7916	101.037
BS-3	part 1	41	433.929	84690.5	2.75205	3.75304	0.651969	24.6949	0.964142	0.678009	0.709859	0.73626	3336.72	18.4898	3296.23	9.40901	3272.38	10.2546	3272.38	10.2546	101.966
BS-3	part 1	44	463.698	125761	2.53872	3.74047	0.779592	24.3801	1.07805	0.664897	0.744428	0.690532	3286.14	19.165	3283.72	10.5154	3282.9	12.2474	3282.9	12.2474	100.099
BS-3	part 1	45	489.218	11852.3	1.60862	3.64893	0.818147	24.7623	1.4752	0.660769	1.22609	0.831132	3270.14	31.4473	3298.89	14.3985	3317.08	12.8551	3317.08	12.8551	98.585
BS-3	part 1	46	259.528	71351.1	2.56769	3.73893	0.666266	24.8607	0.937299	0.677972	0.657105	0.701062	3336.57	17.1152	3302.76	9.14941	3282.97	10.4974	3282.97	10.4974	101.633
BS-3	part 1	47	390.306	111450	2.86866	3.73477	0.661769	24.2414	0.943807	0.660223	0.672064	0.712078	3268.02	17.2288	3278.15	9.20384	3285.02	10.4108	3285.02	10.4108	99.4825
BS-3	part 1	48	332.242	72117	3.22591	3.74574	0.651771	24.2951	0.985691	0.663662	0.738608	0.74933	3281.36	18.994	3280.31	9.61316	3280.33	10.2532	3280.33	10.2532	100.032
BS-3	part 1	50	446.822	14523.4	1.93803	3.51093	1.07599	25.3231	1.67079	0.649634	1.27135	0.760928	3226.78	32.2751	3320.76	16.3218	3378.65	16.9093	3378.65	16.9093	95.5048
BS-3	part 1	51	434.045	22168.1	2.10802	3.5145	0.815609	26.2338	1.18663	0.672815	0.861201	0.725753	3316.73	22.3292	3355.29	11.6069	3379.08	12.7328	3379.08	12.7328	98.1549
BS-3	part 1	52	259.126	27616.8	3.2881	3.46569	0.745624	26.4848	1.063	0.669592	0.753867	0.709187	3304.3	19.4901	3364.61	10.4012	3401.39	11.6647	3401.39	11.6647	97.1456
BS-3	part 1	54	60.3405	15828.1	4.842	3.75561	1.1935	24.1188	1.53695	0.661041	0.943894	0.614136	3271.2	24.2154	3273.21	14.9857	3275.1	19.0658	3275.1	19.0658	99.8807
BS-3	part 1	55	264.713	86408.3	2.38885	3.38169	0.729287	28.8794	1.04874	0.711231	0.753292	0.718282	3463.1	20.183	3449.43	10.2927	3442.17	11.3275	3442.17	11.3275	100.608
BS-3	part 1	56	299.392	20980.9	3.40306	3.71968	0.731042	25.757	1.55288	0.698291	1.36192	0.877028	3414.17	36.0993	3337.36	15.1795	3292.22	11.7146	3292.22	11.7146	103.704
BS-3	part 1	58	271.792	13027.8	2.38475	3.7258	0.730579	24.7991	1.25426	0.674676	1.01642	0.810375	3323.9	26.3973	3300.34	12.2425	3286.73	11.5442	3286.73	11.5442	101.131
BS-3	part 1	59	341.234	93137.8	2.57767	3.739	0.53398	24.5296	0.748759	0.668017	0.524669	0.700718	3298.22	13.5454	3289.68	7.30509	3285.15	8.39256	3285.15	8.39256	100.398
BS-3	part 1	62	201.054	56442.2	2.84883	3.73117	0.668779	24.0348	1.05799	0.653912	0.817417	0.772613	3243.47	20.8339	3269.81	10.3139	3286.67	10.5515	3286.67	10.5515	98.6857
BS-3	part 1	63	322.253	100684	2.2487	3.74114	0.629782	24.4974	0.893506	0.668077	0.633565	0.709078	3298.45	16.3577	3288.4	8.7169	3282.95	9.89485	3282.95	9.89485	100.472
BS-3	part 1	64	480.053	16881.5	1.59207	3.88943	0.674605	22.8648	1.1051	0.649598	0.874519	0.791346	3226.63	22.2001	3221.21	10.7512	3218.5	10.6648	3218.5	10.6648	100.253
BS-3	part 1	67	331.774	93332.5	2.54109	3.73914	0.803939	25.2183	1.30101	0.687384	1.02246	0.785898	3372.63	26.8505	3316.7	12.707	3283.75	12.6352	3283.75	12.6352	102.707
BS-3	part 1	71	365.199	93381.3	24.0496	3.39651	0.756823	27.4116	1.08097	0.677608	0.771739	0.713932	3335.17	20.0945	3398.28	10.5901	3436.37	11.7557	3436.37	11.7557	97.0552
BS-3	part 1	72	175.787	39770.6	3.75551	3.73838	0.769605	24.2879	1.06238	0.661227	0.729505	0.68667	3271.92	18.7184	3280.02	10.361	3285.64	12.1281	3285.64	12.1281	99.5823
BS-3	part 1	73	399.858	111477	2.44059	3.38917	0.683285	28.2465	0.989054	0.696695	0.714852	0.722763	3408.1	18.9223	3427.69	9.6996	3439.83	10.6132	3439.83	10.6132	99.0778
BS-3	part 1	74	270.916	22504.4	2.04998	3.40027	0.70287	27.5932	1.0462	0.677729	0.773374	0.73922	3335.64	20.1393	3404.75	10.2518	3446.34	10.9345	3446.34	10.9345	96.7877
BS-3	part 1	76	192.411	3270.14	3.38596	3.88554	0.751971	21.6325	1.40028	0.614067	1.13108	0.807759	3086.27	27.7402	3167.37	13.5907	3219.84	13.0301	3219.84	13.0301	95.8516
BS-3	part 1	77	294.732	15172.8	2.90296	3.39851	0.802239	28.2112	1.98784	0.693041	1.80659	0.90882	3394.21	47.6736	3426.46	19.4957	3446.05	12.8705	3446.05	12.8705	98.4956
BS-3	part 1	80	430.511	86934	3.40343	3.446	0.811928	28.6338	1.34509	0.715246	1.0722	0.79712	3478.2	28.8221	3441.05	13.1977	3420.15	12.6302	3420.15	12.6302	101.697
BS-3	part 1	81	308.173	79444.5	3.14008	3.73969	0.618786	24.0647	0.893734	0.652411	0.644732	0.721392	3237.62	16.4098	3271.02	8.71298	3292.22	9.71838	3292.22	9.71838	98.3414
BS-3	part 1	85	307.116	47660.1	2.6273	3.73011	0.629127	24.5626	1.48776	0.660099	1.34692	0.905335	3267.54	34.5255	3290.99	14.5165	3305.98	9.91021	3305.98	9.91021	98.8374
BS-3	part 1	86	260.739	65762.5	2.17539	3.39586	0.69321	28.178	0.956116	0.689195	0.657717	0.687905	3379.55	17.299	3425.31	9.37578	3452.86	10.7583	3452.86	10.7583	97.8768
BS-3	part 1	88	285.208	6408.19	4.49599	3.73039	0.72988	24.3225	1.59994	0.65881	1.41818	0.886399	3262.53	36.3093	3281.41	15.6052	3293.63	11.6282	3293.63	11.6282	99.0559
BS-3	part 1	89	319.529	100415	3.51294	3.74585	0.874928	25.1925	1.30265	0.683121	0.964543	0.740449	3356.32	25.2362	3315.71	12.7225	3291.92	13.7478	3291.92	13.7478	101.956
BS-3	part 1	91	226.794	58393.2	2.97353	3.75078	0.755864	24.3225	1.34968	0.661051	1.11702	0.827619	3271.24	28.6573	3281.41	13.164	3288.3	11.8989	3288.3	11.8989	99.4812
BS-3	part 1	92	165.555	48157.9	2.49415	3.38016	0.68859	28.4889	0.968945	0.698766	0.679109	0.700875	3415.97	18.0077	3436.07	9.50515	3448.48	10.7241	3448.48	10.7241	99.0572
BS-3	part 1	93	267.793	11221	4.44827	3.7308	0.645383	25.3817	1.14345	0.688999	0.943418	0.82506	3378.8	24.8093	3323.01	11.1708	3290.21	10.1466	3290.21	10.1466	102.693
BS-3	part 1	94	288.675	90522.6	3.26708	3.73425	1.12331	24.4667	1.59444	0.664035	1.1311	0.709405	3282.81	29.0972	3287.17	15.5551	3290.51	17.6426	3290.51	17.6426	99.7659
BS-3	part 1	96	304.166	55767.8	2.28485	3.8095	0.633656	24.6589	1.29713	0.682927	1.13054	0.87157	3355.58	29.5745	3294.81	12.6582	3258.71	10.0107	3258.71	10.0107	102.973
BS-3	part 1	97	254.416	74833.6	21.8334	3.40521	0.767289	28.558	1.08126	0.706792	0.761238	0.70403	3446.36	20.3213	3438.45	10.6079	3434.51	11.9277	3434.51	11.9277	100.345
BS-3	part 1	98	263.027	61288.1	3.52028	3.35137	0.700559	28.771	0.996621	0.700869	0.707313	0.709711	3423.94	18.7887	3445.74	9.77991	3459.11	10.8806	3459.11	10.8806	98.9834
BS-3	part 1	100	253.94	78597.9	2.73353	3.73399	0.781918	24.5746	1.10025	0.667978	0.773385	0.702921	3298.06	19.9658	3291.47	10.7353	3288.12	12.2919	3288.12	12.2919	100.302
BS-3	part 2	1	178.396	116452	2.00528	3.43773	0.655576	28.7805	0.946256	0.725211	0.682158	0.720902	3515.55	18.4853	3446.06	9.28575	3406.58	10.2029	3406.58	10.2029	103.199
BS-3	part 2	2	183.979	137315	2.0602	3.74024	0.767001	23.9962	1.08943	0.657861	0.773335	0.709854	3258.84	19.7821	3268.24	10.6197	3274.67	12.0595	3274.67	12.0595	99.5166
BS-3	part 2	3	177.509	193186	2.00041	3.40361	0.686221	28.2241	0.920527	0.702172	0.61354	0.666509	3428.88	16.3156	3426.91	9.02728	3426.43	10.6664	3426.43	10.6664	100.072
BS-3	part 2	4	400.737	462313	1.64294	3.7407	0.717013	24.8547	1.00798	0.679526	0.708448	0.70284	3342.54	18.4776	3302.53	9.83929	3279	11.2649	3279	11.2649	101.938
BS-3	part 2	5	213.13	227966	2.58683	3.7323	0.872057	24.7027	1.20261	0.673911	0.828064	0.688554	3320.95	21.4909	3296.54	11.7366	3282.4	13.6991	3282.4	13.6991	101.175
BS-3	part 2	6	361.857	120545	1.86008	3.73532	0.702405	24.9816	1.1539	0.682172	0.915251	0.793181	3352.69	23.9268	3307.5	11.266	3280.89	11.0384	3280.89	11.0384	102.188
BS-3	part 2	7	306.839	130056	1.99293	3.45515	0.730045	28.6787	1.7287	0.724348	1.56697	0.906448	3512.32	42.4335	3442.59	16.963	3402.92	11.3618	3402.92	11.3618	103.215
BS-3	part 2	9	259.515	240001	1.3707	3.37899	0.714499	29.4282	1.05035	0.730543	0.769867	0.73296	3535.44	20.9507	3467.91	10.315	3429.8	11.103	3429.8	11.103	103.08
BS-3	part 2	10	351.029	350847	2.02056	3.74163	0.78928	24.573	1.03535	0.675466	0.670057	0.647179	3326.94	17.414	3291.4	10.102	3270.51	12.4085	3270.51	12.4085	101.725
BS-3	part 2	12	174.292	219322	1.59498	3.37661	0.651511	29.4349	0.894108	0.726349	0.612305	0.684822	3519.8	16.6075	3468.13	8.78054	3439.1	10.1171	3439.1	10.1171	102.347
BS-3	part 2	13	318.276	58038.8	2.3515	3.75949	0.666157	24.2997	1.09276	0.668589	0.864474	0.791095	3300.42	22.3296	3280.49	10.6575	3269.01	10.5087	3269.01	10.5087	100.961
BS-3	part 2	14	86.0553	93744.4	3.29924	3.39035	0.855115	28.8739	1.15237	0.716212	0.772189	0.670088	3481.83	20.7737	3449.24	11.3098	3431.04	13.2906	3431.04	13.2906	101.481
BS-3	part 2	18	379.923	479550	2.33715	3.73763	0.651097	24.5947	0.868809	0.672376	0.575236	0.662097	3315.04	14.9088	3292.26	8.47727	3279.1	10.2287	3279.1	10.2287	101.096
BS-3	part 2	21	190.089	127545	2.51988	3.3727	0.687897	29.3314	1.04367	0.724178	0.784563	0.751735	3511.68	21.2427	3464.67	10.2482	3438.27	10.6879	3438.27	10.6879	102.135
BS-3	part 2	24	318.725	130379	6.29941	3.47964	0.765965	27.6751	1.18494	0.703233	0.904074	0.762971	3432.9	24.063	3407.66	11.6126	3393.52	11.9288	3393.52	11.9288	101.16
BS-3	part 2	26	353.553	298804	2.0393	3.74134	0.907624	25.2634	1.28859	0.690135	0.914628	0.70979	3383.13	24.0756	3318.45	12.5866	3280.28	14.2605	3280.28	14.2605	103.135
BS-3	part 2	28	202.996	192192	1.37791	3.39762	0.649964	29.6408	1.0215	0.734114	0.787982	0.771399	3548.73	21.5041	3474.98	10.0339	3433.4	10.098	3433.4	10.098	103.359
BS-3	part 2	30	207.647	296034	2.16153	3.39773	0.775739	29.0084	1.11108	0.718432	0.795425	0.715905	3490.17	21.4374	3453.8	10.9062	3433.45	12.051	3433.45	12.051	101.652
BS-3	part 2	34	159.394	182818	3.70327	3.74967	0.755029	25.4637	0.992898	0.694068	0.644719	0.649331	3398.12	17.0279	3326.17	9.70105	3283.76	11.8593	3283.76	11.8593	103.482
BS-3	part 2	35	156.004	40509.7	1.6063	3.3353	0.655295	29.6974	0.886296	0.720437	0.595856	0.672299	3497.68	16.0849	3476.85	8.70636	3465.53	10.163	3465.53	10.163	100.928
BS-3	part 2	41	446.638	467092	1.94764	3.74468	0.707822	24.9315	0.988535	0.678324	0.690025	0.698028	3337.92	17.9782	3305.54	9.65063	3286.63	11.1197	3286.63	11.1197	101.561
BS-3	part 2	42	310.616	283469	2.03676	3.37431	0.717732	30.6304	1.18989	0.750973	0.949033	0.797581	3611.1	26.239	3507.25	11.7005	3449.14	11.1367	3449.14	11.1367	104.696
BS-3	part 2	44	362.179	410242	1.92724	3.74062	0.641856	25.0252	0.910923	0.679134	0.646366	0.709573	3341.04	16.8526	3309.2	8.89418	3290.64	10.0797	3290.64	10.0797	101.531
BS-3	part 2	45	340.298	369886	2.66975	3.72842	0.69844	25.4452	0.961104	0.688286	0.660226	0.686945	3376.08	17.3514	3325.45	9.39014	3295.76	10.9637	3295.76	10.9637	102.437
BS-3	part 2	46	119.401	131809	4.38206	3.40347	0.739777	28.6226	1.0406	0.707912	0.731718	0.70317	3450.58	19.5514	3440.66	10.2097	3435.56	11.492	3435.56	11.492	100.437
BS-3	part 2	56	436.919	444353	1.61811	3.73409	1.06472	24.0892	1.49602	0.668893	1.05092	0.702476	3301.6	27.153	3272.01	14.5859	3254.6	16.7663	3254.6	16.7663	101.444
BS-3	part 2	57	325.029	276606	2.09377	3.7627	0.788457	24.6901	1.22475	0.69087	0.93719	0.765208	3385.93	24.6851	3296.04	11.9524	3242.49	12.4281	3242.49	12.4281	104.424
BS-3	part 2	58	298.216	227818	1.93908	3.3412	0.924775	28.6131	1.29055	0.706207	0.900109	0.697459	3444.14	24.0168	3440.34	12.6622	3438.79	14.3613	3438.79	14.3613	100.156
BS-3	part 2	60	164.92	203058	1.66515	3.36216	0.732562	28.7065	1.01964	0.712969	0.709199	0.695536	3469.64	19.0287	3443.53	10.0051	3429.05	11.3846	3429.05	11.3846	101.184
BS-3	part 2	65	204.349	269200	2.55436	3.34026	0.78409	30.0061	1.11475	0.74148	0.792368	0.710802	3576.05	21.7484	3487.01	10.9544	3436.92	12.1776	3436.92	12.1776	104.048
BS-3	part 2	66	410.861	469804	2.12615	3.74266	0.594304	23.6557	0.86055	0.654952	0.622358	0.72321	3247.52	15.8776	3254.31	8.38368	3259.17	9.35514	3259.17	9.35514	99.6425
BS-3	part 2	70	164.946	198824	1.39472	3.37574	0.770561	29.3621	1.14725	0.727479	0.84984	0.740761	3524.02	23.0709	3465.7	11.2658	3432.83	11.9729	3432.83	11.9729	102.656
BS-3	part 2	71	350.979	408552	4.36813	3.4111	0.774252	28.2532	1.05631	0.707279	0.718553	0.680249	3448.19	19.1895	3427.92	10.3593	3416.76	12.0434	3416.76	12.0434	100.92
BS-3	part 2	75	236.028	241025	2.26255	3.73948	0.793817	25.1166	1.10934	0.685641	0.774895	0.698517	3365.97	20.3186	3312.76	10.8332	3281.39	12.47	3281.39	12.47	102.577
BS-3	part 2	77	439.022	462501	2.06328	3.73912	0.574306	25.1192	0.785572	0.685592	0.535985	0.682286	3365.78	14.0535	3312.86	7.67132	3281.66	9.02021	3281.66	9.02021	102.563
BS-3	part 2	79	361.601	353940	1.34898	3.80163	0.822017	24.4337	1.12985	0.676085	0.775119	0.686035	3329.32	20.1555	3285.86	11.0217	3260.12	12.9389	3260.12	12.9389	102.123
BS-3	part 2	80	301.264	311713	2.39336	3.73279	0.643919	25.298	0.874646	0.687333	0.591837	0.676659	3372.44	15.5413	3319.79	8.54351	3288.82	10.1147	3288.82	10.1147	102.542
BS-3	part 2	81	388.653	428770	2.13573	3.74304	0.702549	25.1605	0.969766	0.685453	0.668449	0.689289	3365.25	17.5246	3314.47	9.47071	3284.57	11.0334	3284.57	11.0334	102.456
BS-3	part 2	82	341.393	229847	5.85453	3.39314	0.690348	28.8635	0.993678	0.712866	0.714693	0.71924	3469.25	19.1745	3448.89	9.75208	3437.75	10.7211	3437.75	10.7211	100.916
BS-3	part 2	83	441.426	328289	2.03135	3.74922	0.761112	24.5576	1.0715	0.670429	0.754107	0.703789	3307.53	19.5109	3290.79	10.4545	3281.27	11.9572	3281.27	11.9572	100.8
BS-3	part 2	84	302.572	140498	2.45356	3.73371	0.630424	24.7337	0.90634	0.67255	0.650947	0.718215	3315.71	16.8737	3297.76	8.84543	3287.54	9.90608	3287.54	9.90608	100.857
BS-3	part 2	86	288.315	328123	1.7911	3.74512	0.712491	25.4968	1.11665	0.69531	0.859792	0.769973	3402.84	22.7323	3327.44	10.9108	3283	11.1906	3283	11.1906	103.65
BS-3	part 2	88	339.484	376704	1.80595	3.74013	0.785579	24.5527	1.06493	0.668151	0.718975	0.675136	3298.73	18.564	3290.6	10.3904	3286.31	12.336	3286.31	12.336	100.378
BS-3	part 2	90	352.743	73809.1	1.37893	3.48213	1.04355	27.2866	1.80442	0.69232	1.47204	0.815796	3391.46	38.821	3393.81	17.6758	3395.86	16.2515	3395.86	16.2515	99.8703
BS-3	part 2	94	368.897	532647	1.89073	3.37222	0.725822	29.1595	1.02467	0.715768	0.72327	0.705855	3480.17	19.4506	3458.9	10.0597	3447.28	11.2636	3447.28	11.2636	100.954
BS-3	part 2	97	327.893	351363	1.99638	3.73853	0.768704	24.3426	1.09152	0.662468	0.774882	0.709913	3276.73	19.9052	3282.21	10.6461	3286.23	12.0714	3286.23	12.0714	99.7111
BS-3	part 2	98	124.014	184357	2.16408	3.34439	0.769754	30.4793	1.08145	0.742073	0.759589	0.702379	3578.25	20.8583	3502.39	10.6324	3459.96	11.9292	3459.96	11.9292	103.419
BS-3	part 2	100	315.866	317297	2.8951	3.73378	0.803683	24.3393	1.09	0.661547	0.736324	0.675525	3273.16	18.8989	3282.08	10.6313	3288.21	12.6237	3288.21	12.6237	99.5425
BSol-53-1	part 1	2	202.414	80676.3	1.45418	3.78535	0.929896	23.586	1.31878	0.652133	0.934296	0.708453	3236.53	23.7737	3251.44	12.8467	3261.32	14.6434	3261.32	14.6434	99.2401
BSol-53-1	part 1	5	225.481	15619.1	1.10547	3.37726	0.671381	28.1608	0.936773	0.694363	0.648187	0.691936	3399.24	17.1238	3424.71	9.1859	3440.31	10.5007	3440.31	10.5007	98.806
BSol-53-1	part 1	6	274.532	55639.2	0.929795	3.95354	0.912077	22.3744	1.15218	0.644936	0.702156	0.609415	3208.39	17.7468	3200.12	11.199	3195.62	14.4521	3195.62	14.4521	100.4
BSol-53-1	part 1	7	202.295	77246.8	1.18015	3.82377	0.710588	23.5578	0.953774	0.656604	0.635564	0.666367	3253.96	16.2392	3250.27	9.29037	3248.68	11.2038	3248.68	11.2038	100.163
BSol-53-1	part 1	9	395.704	20336.2	0.91796	3.43929	0.779331	25.8116	1.28777	0.64786	1.02075	0.792651	3219.84	25.8704	3339.43	12.5888	3412.67	12.2164	3412.67	12.2164	94.3496
BSol-53-1	part 1	13	204.11	84992.3	1.62962	3.34765	0.69484	29.1149	0.972732	0.7105	0.680189	0.699256	3460.34	18.2134	3457.4	9.54926	3456.36	10.778	3456.36	10.778	100.115
BSol-53-1	part 1	14	175.584	63406.7	1.31147	3.12298	0.679399	32.0931	0.951796	0.730676	0.665251	0.698942	3535.94	18.1056	3553.16	9.37261	3563.52	10.4762	3563.52	10.4762	99.2259
BSol-53-1	part 1	18	130.198	47279.2	0.628911	3.65927	0.712187	24.838	0.961214	0.662827	0.643325	0.669284	3278.13	16.5311	3301.87	9.38253	3316.99	11.1919	3316.99	11.1919	98.8282
BSol-53-1	part 1	19	242.954	81990.2	1.11805	3.35695	0.606353	27.2696	0.959616	0.667833	0.743416	0.774702	3297.5	19.1896	3393.2	9.39938	3450.87	9.41366	3450.87	9.41366	95.5558
BSol-53-1	part 1	21	264.306	49065.7	0.85805	3.73557	0.718466	24.1556	1.00766	0.658543	0.705585	0.700219	3261.49	18.0604	3274.69	9.82521	3283.45	11.2985	3283.45	11.2985	99.3313
BSol-53-1	part 1	22	105.096	35157.5	0.980069	3.36936	0.750651	27.8101	1.03219	0.683957	0.705851	0.683841	3359.53	18.4812	3412.43	10.1172	3444.3	11.6896	3444.3	11.6896	97.5386
BSol-53-1	part 1	23	266.797	110638	1.31108	3.37537	0.733508	28.6355	1.02939	0.705056	0.722041	0.701423	3439.79	19.2471	3441.11	10.0999	3442.54	11.3897	3442.54	11.3897	99.9201
BSol-53-1	part 1	26	273.337	6.59342e+06	1.02138	3.77594	0.688689	22.866	0.990178	0.629631	0.711448	0.718506	3148.13	17.7198	3221.26	9.63311	3267.79	10.8283	3267.79	10.8283	96.3381
BSol-53-1	part 1	27	140.675	1.72363e+06	1.94096	3.12635	0.534481	32.0118	0.738591	0.729831	0.509751	0.690167	3532.79	13.8642	3550.66	7.27248	3561.42	8.2196	3561.42	8.2196	99.1961
BSol-53-1	part 1	28	224.314	4.76071e+06	1.08493	3.34524	0.810087	28.7144	1.16042	0.698506	0.830861	0.716001	3414.98	22.0268	3443.8	11.3866	3461.28	12.5531	3461.28	12.5531	98.6623
BSol-53-1	part 1	29	383.023	6.11503e+06	1.50041	3.29754	1.16401	27.129	2.13561	0.65053	1.7905	0.838405	3230.28	45.4929	3388.13	20.9166	3483.52	18.018	3483.52	18.018	92.7301
BSol-53-1	part 1	32	257.714	50583.3	1.87457	3.82293	0.727076	22.117	1.02411	0.615337	0.720424	0.703462	3091.34	17.6912	3188.88	9.94915	3251.51	11.4645	3251.51	11.4645	95.0738
BSol-53-1	part 1	35	298.781	73562.9	1.25264	3.6457	0.632704	24.5462	0.901685	0.651673	0.642193	0.712215	3234.74	16.3339	3290.34	8.79738	3325.06	9.91247	3325.06	9.91247	97.2836
BSol-53-1	part 1	36	207.85	58778.7	1.94469	3.12738	0.59444	32.3558	0.957588	0.736869	0.749947	0.783163	3558.96	20.5104	3561.18	9.43196	3563.08	9.1578	3563.08	9.1578	99.8846
BSol-53-1	part 1	37	287.731	51317	1.7985	3.48718	0.647373	25.5536	0.971663	0.649038	0.723841	0.744951	3224.44	18.3655	3329.61	9.49482	3394.21	10.0933	3394.21	10.0933	94.9984
BSol-53-1	part 1	38	344.509	135051	1.11147	3.3928	0.703698	29.2116	0.929166	0.72081	0.606652	0.652899	3499.08	16.3812	3460.65	9.12256	3439.15	10.9283	3439.15	10.9283	101.743
BSol-53-1	part 1	39	167.559	57420.9	2.24106	3.39034	0.710753	28.2656	1.03939	0.698588	0.757961	0.729237	3415.29	20.0955	3428.35	10.1935	3436.66	11.0457	3436.66	11.0457	99.3783
BSol-53-1	part 1	40	157.677	31783.8	0.558723	3.81669	0.707832	23.8429	0.964048	0.66383	0.649591	0.673816	3282.01	16.7073	3261.99	9.39502	3250.38	11.2208	3250.38	11.2208	100.973
BSol-53-1	part 1	43	212.357	31795.8	0.971314	3.68849	0.641413	24.3944	0.901281	0.656337	0.630398	0.699447	3252.91	16.1032	3284.28	8.79131	3304.16	10.1043	3304.16	10.1043	98.4489
BSol-53-1	part 1	45	284.749	25001.8	0.905096	3.89003	0.765527	21.717	1.39344	0.615289	1.15831	0.831254	3091.14	28.4429	3171.16	13.5268	3222.86	12.2239	3222.86	12.2239	95.9131
BSol-53-1	part 1	46	213.715	24332.5	1.46363	3.37038	1.27818	25.4009	1.96466	0.624805	1.48966	0.758231	3129.01	36.9279	3323.75	19.1955	3444.05	19.8773	3444.05	19.8773	90.8525
BSol-53-1	part 1	47	163.296	60916.6	1.22738	3.79121	0.71996	24.0553	0.985144	0.66508	0.670937	0.681055	3286.85	17.2759	3270.63	9.60404	3261.39	11.3528	3261.39	11.3528	100.781
BSol-53-1	part 1	50	215.524	43801.2	0.563108	3.82963	0.744175	21.1198	1.81114	0.590603	1.64956	0.910785	2991.87	39.4844	3144.11	17.5604	3243.46	11.7858	3243.46	11.7858	92.2429
BSol-53-1	part 1	52	173.332	60689.1	0.626207	3.82639	0.689012	22.8092	0.966895	0.638139	0.677616	0.700816	3181.7	17.0164	3218.84	9.40561	3242.74	10.8714	3242.74	10.8714	98.1175
BSol-53-1	part 1	53	118.787	42831.9	1.20518	3.39031	1.22042	27.7347	1.71084	0.68759	1.19756	0.699982	3373.42	31.4543	3409.76	16.7686	3431.86	18.9833	3431.86	18.9833	98.2971
BSol-53-1	part 1	54	207.673	101066	0.974618	3.34709	0.642072	28.9257	0.899986	0.706531	0.629883	0.699881	3445.37	16.8111	3451	8.83316	3454.94	9.96382	3454.94	9.96382	99.7229
BSol-53-1	part 1	56	260.499	47740.9	0.829565	3.72828	0.755334	23.744	1.25847	0.646476	1.00601	0.799386	3214.42	25.4635	3257.94	12.2625	3285.5	11.8736	3285.5	11.8736	97.8364
BSol-53-1	part 1	57	318.994	26655.5	1.10885	3.37224	0.753285	27.0107	1.21167	0.665486	0.943198	0.778428	3288.43	24.2952	3383.85	11.8644	3441.52	11.8084	3441.52	11.8084	95.5515
BSol-53-1	part 1	58	244.836	97923.3	1.40976	3.35268	0.65734	28.6313	0.985949	0.700674	0.734415	0.744881	3423.21	19.5055	3440.96	9.6736	3451.99	10.1985	3451.99	10.1985	99.1662
BSol-53-1	part 1	59	290.84	76262.3	0.683833	3.34552	0.635827	28.3944	0.879536	0.694802	0.606607	0.689689	3400.91	16.0313	3432.81	8.62704	3452.16	9.87338	3452.16	9.87338	98.5155
BSol-53-1	part 1	62	351.957	18618.7	1.61492	3.85321	0.672145	22.0686	0.962531	0.622613	0.661874	0.68764	3120.31	16.3719	3186.75	9.34997	3229.53	11.027	3229.53	11.027	96.6179
BSol-53-1	part 1	63	275.224	80811.5	0.657157	3.8428	0.7023	22.3035	1.12029	0.627475	0.872349	0.77868	3139.6	21.6817	3197.04	10.8875	3233.96	11.0869	3233.96	11.0869	97.0823
BSol-53-1	part 1	64	340.285	2701.75	0.453934	8.71827	7.74352	0.205837	8.02714	0.0137343	1.5253	0.190018	87.9347	1.33216	190.053	13.914	1778.46	143.992	87.9347	1.33216	4.94444
BSol-53-1	part 1	66	220.563	79231.6	0.799161	3.74442	0.653028	23.9367	0.883783	0.656177	0.594344	0.672499	3252.29	15.18	3265.82	8.61413	3274.8	10.2788	3274.8	10.2788	99.3127
BSol-53-1	part 1	67	352.45	127764	0.911144	3.34415	0.707476	28.3696	0.973022	0.694398	0.667952	0.686471	3399.37	17.6465	3431.96	9.54378	3451.7	10.97	3451.7	10.97	98.484
BSol-53-1	part 1	70	246.224	29691.9	0.981884	3.81169	0.771334	21.1812	1.078	0.589351	0.746599	0.692577	2986.79	17.8468	3146.92	10.4527	3251.38	12.248	3251.38	12.248	91.8621
BSol-53-1	part 1	74	250.343	107278	1.37635	3.34545	0.83862	28.7973	1.15763	0.704452	0.7978	0.689167	3437.51	21.256	3446.63	11.3604	3452.61	13.0061	3452.61	13.0061	99.5626
BSol-53-1	part 1	76	260.29	42954.8	1.41947	3.46649	0.841675	25.1378	1.44161	0.637511	1.16781	0.810076	3179.22	29.3087	3313.58	14.0787	3396.57	13.1612	3396.57	13.1612	93.6011
BSol-53-1	part 1	77	239.462	34605.9	1.14725	3.82846	0.997315	22.0127	1.55195	0.616768	1.18648	0.764511	3097.04	29.1781	3184.29	15.0746	3240.4	15.7715	3240.4	15.7715	95.5759
BSol-53-1	part 1	80	262.616	40949.8	1.16652	3.34295	0.822115	28.2811	1.22492	0.691145	0.907229	0.740641	3386.99	23.9015	3428.89	12.0135	3454.13	12.7597	3454.13	12.7597	98.056
BSol-53-1	part 1	82	225.377	10505	0.979701	3.8175	0.780408	22.1292	1.25102	0.619467	0.933629	0.746293	3107.8	23.0219	3189.41	12.154	3241.84	13.126	3241.84	13.126	95.8653
BSol-53-1	part 1	85	267.761	8885.25	1.03294	3.71272	0.739422	21.72	2.12049	0.590269	1.96239	0.925439	2990.51	46.9559	3171.29	20.5863	3288.43	12.6195	3288.43	12.6195	90.9405
BSol-53-1	part 1	87	191.839	74198.3	1.60697	3.34143	0.804712	29.0556	1.11277	0.707806	0.767905	0.690086	3450.18	20.5165	3455.4	10.9233	3459.09	12.4813	3459.09	12.4813	99.7425
BSol-53-1	part 1	91	139.928	63839.4	1.16519	3.3692	0.865109	29.5681	1.24605	0.72294	0.895621	0.718769	3507.06	24.2257	3472.57	12.2389	3453.4	13.4319	3453.4	13.4319	101.554
BSol-53-1	part 1	93	325.562	40829.6	0.891024	3.95687	0.777495	21.3807	1.37135	0.614268	1.12825	0.82273	3087.07	27.6763	3156.01	13.303	3200.83	12.327	3200.83	12.327	96.4458
BSol-53-1	part 1	100	217.749	9969.41	0.698633	3.38263	0.679145	26.9288	1.16003	0.661903	0.896566	0.772885	3274.54	23.0193	3380.88	11.3574	3445.19	11.4246	3445.19	11.4246	95.0468
BSol-53-1	part 2	1	109.773	58712.8	1.36581	3.8217	0.710329	23.9899	1.01368	0.670533	0.722115	0.712373	3307.93	18.6849	3267.98	9.88113	3244.24	11.2116	3244.24	11.2116	101.963
BSol-53-1	part 2	2	249.958	118095	1.85022	3.34	0.72705	28.8935	1.07789	0.705517	0.795665	0.738172	3441.54	21.2179	3449.91	10.5789	3455.44	11.2716	3455.44	11.2716	99.5976
BSol-53-1	part 2	3	372.065	70944	2.24485	3.15032	0.669764	31.5907	1.08841	0.72577	0.857507	0.787854	3517.64	23.2474	3537.62	10.7128	3549.62	10.3266	3549.62	10.3266	99.0989
BSol-53-1	part 2	4	78.603	29271.1	0.94841	3.90102	0.995675	21.8453	1.61295	0.622097	1.26711	0.785586	3118.26	31.3268	3176.87	15.6619	3214.78	15.7607	3214.78	15.7607	96.9976
BSol-53-1	part 2	5	234.122	56892	1.67091	3.82027	0.67638	21.8009	1.43466	0.607551	1.26436	0.881297	3060.19	30.8043	3174.9	13.9293	3248.89	10.6807	3248.89	10.6807	94.1918
BSol-53-1	part 2	6	533.539	58957.7	1.84187	3.65134	0.769051	19.2295	2.38826	0.512172	2.26092	0.946683	2665.89	49.3658	3053.4	23.0552	3320.01	12.0546	3320.01	12.0546	80.2978
BSol-53-1	part 2	7	338.394	167501	2.43778	3.82565	0.65532	23.8439	0.949517	0.665106	0.687068	0.723597	3286.96	17.6916	3262.03	9.25342	3247.43	10.326	3247.43	10.326	101.217
BSol-53-1	part 2	9	296.726	82969.1	1.15386	3.81991	1.0398	23.7002	1.69046	0.65991	1.33245	0.788216	3266.81	34.1485	3256.14	16.4712	3250.26	16.3875	3250.26	16.3875	100.509
BSol-53-1	part 2	10	165.716	60061	0.89008	3.82728	1.08201	24.1087	1.50829	0.672701	1.0501	0.696216	3316.29	27.2241	3272.8	14.706	3246.94	17.0599	3246.94	17.0599	102.136
BSol-53-1	part 2	11	108.998	59528.4	1.19711	3.83236	0.732029	24.7901	0.97692	0.692682	0.645101	0.660342	3392.84	17.0179	3299.99	9.53514	3244.73	11.5616	3244.73	11.5616	104.565
BSol-53-1	part 2	12	343.539	134134	1.54618	3.40578	0.875133	28.5011	1.24046	0.705868	0.878925	0.708547	3442.86	23.445	3436.49	12.1691	3433.44	13.5983	3433.44	13.5983	100.274
BSol-53-1	part 2	13	327.336	159707	1.62351	3.73665	0.611332	25.0811	0.872509	0.681043	0.62241	0.713356	3348.36	16.2552	3311.38	8.51982	3289.74	9.60285	3289.74	9.60285	101.782
BSol-53-1	part 2	14	320.104	16191.1	1.53811	3.36933	0.557411	26.2157	1.08914	0.643071	0.93432	0.85785	3201.08	23.5732	3354.62	10.653	3448.33	8.68489	3448.33	8.68489	92.8297
BSol-53-1	part 2	15	215.09	92149.1	2.56117	3.3878	0.733107	28.9614	1.05194	0.713075	0.754197	0.716958	3470.04	20.2378	3452.21	10.3251	3442.55	11.384	3442.55	11.384	100.798
BSol-53-1	part 2	16	342.755	157408	1.40853	3.74296	0.750818	24.9806	1.02855	0.679464	0.702902	0.683391	3342.3	18.332	3307.46	10.0421	3287.08	11.7953	3287.08	11.7953	101.68
BSol-53-1	part 2	20	380.137	39164.8	1.40136	3.4614	0.64884	26.731	1.12461	0.672513	0.915547	0.814105	3315.56	23.7319	3373.66	11.0077	3409.02	10.159	3409.02	10.159	97.2586
BSol-53-1	part 2	21	186.227	30451.1	1.23732	3.79538	0.726888	23.849	1.01367	0.658167	0.705426	0.695912	3260.03	18.05	3262.24	9.87875	3264.27	11.4488	3264.27	11.4488	99.8701
BSol-53-1	part 2	22	269.026	86467.1	0.945457	3.8174	0.585483	23.1444	0.823451	0.641895	0.577518	0.701339	3196.46	14.5547	3233.03	8.01505	3256.48	9.24158	3256.48	9.24158	98.1569
BSol-53-1	part 2	23	213.676	38398.2	0.391511	3.82796	0.66558	21.0608	3.1345	0.586078	3.06214	0.976915	2973.5	72.9446	3141.39	30.3936	3251.17	10.5473	3251.17	10.5473	91.4594
BSol-53-1	part 2	24	195.837	90097.7	1.38854	3.82137	0.641623	24.2353	0.901448	0.671934	0.632931	0.702127	3313.34	16.3977	3277.91	8.79066	3256.98	10.1055	3256.98	10.1055	101.73
BSol-53-1	part 2	25	280.449	16427	2.01437	3.29899	0.769928	24.683	1.53137	0.591747	1.32214	0.863368	2996.5	31.6855	3295.76	14.945	3483.86	11.9601	3483.86	11.9601	86.0108
BSol-53-1	part 2	26	278.238	43749.6	1.19837	3.36244	0.586336	24.9058	1.94041	0.607803	1.8496	0.953201	3061.2	45.0748	3304.53	18.9443	3456.32	9.09182	3456.32	9.09182	88.5683
BSol-53-1	part 2	27	347.408	63627.8	1.24542	3.72629	0.590456	23.6488	0.969748	0.639469	0.767568	0.791513	3186.93	19.2998	3254.03	9.44745	3296.31	9.30279	3296.31	9.30279	96.6816
BSol-53-1	part 2	29	296.222	10064.8	0.957139	3.68187	0.804999	19.2731	2.22806	0.516977	2.05563	0.922608	2686.35	45.1609	3055.59	21.5107	3308.92	13.477	3308.92	13.477	81.185
BSol-53-1	part 2	31	467.381	55330	0.788857	3.79067	1.07045	21.4278	1.68937	0.589843	1.30661	0.77343	2988.78	31.2499	3158.15	16.3901	3268.28	16.8401	3268.28	16.8401	91.4481
BSol-53-1	part 2	32	270.757	33121.4	1.13624	3.94037	0.794358	19.0005	1.49167	0.543995	1.26066	0.845128	2800.15	28.633	3041.84	14.3899	3206.31	12.5995	3206.31	12.5995	87.3324
BSol-53-1	part 2	34	227.139	105207	1.21629	3.73773	0.665407	24.7741	0.908437	0.673	0.617638	0.679891	3317.44	16.0167	3299.36	8.86645	3289.06	10.4627	3289.06	10.4627	100.863
BSol-53-1	part 2	35	143.027	75206.1	1.12225	3.53474	0.723495	27.6921	0.95063	0.711483	0.616416	0.648429	3464.05	16.5191	3408.26	9.31638	3376.3	11.29	3376.3	11.29	102.599
BSol-53-1	part 2	37	147.834	57303.8	0.476448	3.81794	0.692046	23.4714	1.04685	0.651509	0.783561	0.748492	3234.1	19.9265	3246.69	10.1955	3255.16	10.9311	3255.16	10.9311	99.353
BSol-53-1	part 2	39	211.712	98422.5	1.10819	3.37524	0.6298	28.9102	0.87223	0.709333	0.603013	0.691347	3455.95	16.1313	3450.47	8.56057	3447.97	9.77907	3447.97	9.77907	100.231
BSol-53-1	part 2	40	229.114	45163.9	1.03554	3.34465	0.711987	29.7958	1.06539	0.724712	0.790941	0.742396	3513.68	21.4246	3480.1	10.4669	3461.5	11.0596	3461.5	11.0596	101.507
BSol-53-1	part 2	41	290.474	53996	1.07576	3.89883	0.847454	22.7844	1.46904	0.64603	1.19791	0.815434	3212.67	30.3082	3217.78	14.2902	3221.64	13.421	3221.64	13.421	99.7218
BSol-53-1	part 2	43	356.824	57893	1.41707	3.35655	1.1042	27.3274	1.60525	0.666947	1.16429	0.725306	3294.08	30.0299	3395.27	15.7253	3456.21	17.133	3456.21	17.133	95.309
BSol-53-1	part 2	46	316.388	69528.9	0.471787	3.78078	0.759685	22.8393	1.2087	0.627024	0.939316	0.777128	3137.81	23.3357	3220.12	11.7587	3272.48	11.9569	3272.48	11.9569	95.8847
BSol-53-1	part 2	47	302.24	104472	0.937019	3.352	0.691696	28.1271	1.18287	0.684439	0.959036	0.810773	3361.37	25.1209	3423.54	11.5988	3460.79	10.7289	3460.79	10.7289	97.1274
BSol-53-1	part 2	49	372.826	178590	0.950445	3.20848	0.688258	29.7639	1.10045	0.695217	0.858639	0.780259	3402.49	22.7	3479.05	10.811	3524.1	10.6159	3524.1	10.6159	96.5491
BSol-53-1	part 2	51	217.662	120927	1.00886	3.81855	0.719806	24.1578	1.02513	0.672755	0.729768	0.711879	3316.5	18.9203	3274.78	9.99557	3250.01	11.3411	3250.01	11.3411	102.046
BSol-53-1	part 2	53	333.801	7.27841e+06	1.82366	3.39665	0.682808	28.9629	1.00841	0.717757	0.742073	0.735881	3487.63	19.9886	3452.26	9.89785	3432.47	10.6079	3432.47	10.6079	101.607
BSol-53-1	part 2	55	235.886	20185.4	0.993262	3.37041	0.620808	23.8158	1.84757	0.586449	1.73511	0.939131	2975.01	41.3482	3260.88	18.0059	3442.37	9.85384	3442.37	9.85384	86.4233
BSol-53-1	part 2	57	91.4402	34142.6	1.08172	3.41688	0.767671	26.6085	1.20184	0.662668	0.921463	0.766708	3277.51	23.6749	3369.17	11.7618	3424.81	11.9942	3424.81	11.9942	95.699
BSol-53-1	part 2	58	186.632	64509.1	0.774837	3.48174	0.822389	26.3248	1.47542	0.667742	1.22385	0.829496	3297.15	31.5886	3358.68	14.4338	3396.27	12.831	3396.27	12.831	97.0814
CH-20	part 1	1	268.918	415714	1.04839	3.34291	0.807331	28.8063	1.11487	0.701819	0.76884	0.689626	3427.54	20.4394	3446.94	10.9408	3458.9	12.5126	3458.9	12.5126	99.0933
CH-20	part 1	3	203.075	327601	1.9622	3.34347	0.865872	29.0663	1.20492	0.709098	0.837894	0.695395	3455.06	22.4103	3455.76	11.8281	3456.84	13.4222	3456.84	13.4222	99.9484
CH-20	part 1	4	239.76	102826	0.978376	3.39579	0.946759	28.8192	1.61255	0.714228	1.30518	0.809388	3474.38	35.0559	3447.38	15.8258	3432.4	14.7128	3432.4	14.7128	101.223
CH-20	part 1	6	162.933	290353	1.20528	3.38507	0.609245	28.2931	0.819765	0.698833	0.54846	0.669045	3416.22	14.5441	3429.31	8.03977	3437.63	9.46165	3437.63	9.46165	99.3773
CH-20	part 1	8	206.4	290698	1.16994	3.47315	0.72305	28.726	1.19	0.727794	0.945123	0.794221	3525.19	25.6641	3444.2	11.6771	3398.1	11.2568	3398.1	11.2568	103.74
CH-20	part 1	9	141.133	216607	1.46461	3.34782	0.748747	29.4787	1.03263	0.719939	0.711054	0.688588	3495.82	19.1869	3469.59	10.1414	3455.16	11.6077	3455.16	11.6077	101.177
CH-20	part 1	10	234.216	302478	1.26243	3.37376	0.772273	28.6792	1.09238	0.70581	0.77251	0.707182	3442.64	20.6054	3442.6	10.7185	3443.25	11.9891	3443.25	11.9891	99.9824
CH-20	part 1	11	264.816	293261	1.21026	3.36932	0.639174	28.7121	1.03091	0.706788	0.808828	0.78458	3446.34	21.5916	3443.73	10.1157	3442.88	9.92235	3442.88	9.92235	100.1
CH-20	part 1	12	231.122	392517	1.98604	3.34217	0.898236	29.4636	1.28901	0.718537	0.924495	0.717215	3490.56	24.9181	3469.09	12.6594	3457.39	13.9236	3457.39	13.9236	100.96
CH-20	part 1	15	264.222	318622	0.864855	3.34225	0.60417	28.6215	0.8399	0.698888	0.583401	0.694608	3416.43	15.4714	3440.63	8.24047	3455.41	9.36465	3455.41	9.36465	98.8718
CH-20	part 1	18	222.363	68939.2	1.2214	3.33769	0.668223	28.7414	0.938919	0.701117	0.658702	0.701554	3424.88	17.5011	3444.73	9.21333	3456.96	10.3699	3456.96	10.3699	99.0722
CH-20	part 1	19	208.618	147867	1.2259	3.34036	0.759355	27.7518	1.12942	0.677352	0.836022	0.740224	3334.19	21.7635	3410.37	11.0695	3456.1	11.7709	3456.1	11.7709	96.4725
CH-20	part 1	20	223.949	433851	1.00733	3.34431	0.730586	28.5904	1.04001	0.698541	0.740167	0.71169	3415.11	19.623	3439.56	10.2036	3454.5	11.3257	3454.5	11.3257	98.8599
CH-20	part 1	24	100.332	157620	1.21272	3.33747	0.828758	29.0953	1.10814	0.711815	0.735589	0.663808	3465.3	19.7181	3456.74	10.8784	3452.45	12.8504	3452.45	12.8504	100.372
CH-20	part 1	26	151.409	231926	1.32928	3.38738	0.72571	28.923	0.987529	0.718136	0.669616	0.678072	3489.06	18.0424	3450.91	9.69239	3429.51	11.2789	3429.51	11.2789	101.736
CH-20	part 1	27	170.893	236993	1.65692	3.36162	0.83758	28.9033	1.17258	0.712184	0.820578	0.699808	3466.69	22.003	3450.24	11.5085	3441.37	13.0041	3441.37	13.0041	100.736
CH-20	part 1	28	160.523	222035	1.02513	3.34436	0.763555	28.5928	1.07999	0.700813	0.76368	0.70712	3423.73	20.2851	3439.64	10.5958	3449.59	11.8484	3449.59	11.8484	99.2504
CH-20	part 1	31	260.65	250340	1.51673	3.39997	1.12811	27.7885	1.60698	0.692415	1.14437	0.712123	3391.82	30.182	3411.66	15.7515	3424	17.5393	3424	17.5393	99.0603
CH-20	part 1	34	205.883	304595	1.29015	3.34119	0.678737	28.6715	0.90287	0.70186	0.595376	0.659426	3427.7	15.8284	3442.34	8.85884	3451.54	10.5235	3451.54	10.5235	99.3094
CH-20	part 1	35	284.496	187128	1.92042	3.43049	0.837992	27.5669	1.1538	0.692909	0.793062	0.68735	3393.7	20.9252	3403.82	11.3058	3410.44	13.0361	3410.44	13.0361	99.5092
CH-20	part 1	36	240.324	325601	1.78034	3.34282	0.665721	28.6546	0.939909	0.701785	0.663473	0.705891	3427.41	17.6377	3441.76	9.22211	3450.79	10.3285	3450.79	10.3285	99.3225
CH-20	part 1	37	158.226	252834	1.35337	3.35338	0.67419	28.2978	1.02112	0.695257	0.766854	0.750995	3402.64	20.2741	3429.47	10.0147	3445.85	10.4642	3445.85	10.4642	98.7459
CH-20	part 1	39	152.938	179097	1.08822	3.8087	0.721809	23.7037	0.993251	0.660378	0.682258	0.686893	3268.62	17.4926	3256.29	9.67735	3249.37	11.3717	3249.37	11.3717	100.592
CH-20	part 1	40	173.951	340662	1.50591	3.34342	0.724538	29.0353	1.01931	0.710006	0.716928	0.703346	3458.48	19.1893	3454.71	10.0056	3453.2	11.2332	3453.2	11.2332	100.153
CH-20	part 1	41	229.935	385220	1.70193	3.34666	0.691345	29.3465	1.02397	0.718303	0.755325	0.73764	3489.68	20.3545	3465.18	10.055	3451.71	10.7193	3451.71	10.7193	101.1
CH-20	part 1	42	194.826	359505	1.50053	3.35452	0.694016	29.0728	1.00608	0.713281	0.728376	0.723974	3470.82	19.5482	3455.98	9.87619	3448.06	10.7693	3448.06	10.7693	100.66
CH-20	part 1	43	167.663	316415	1.12986	3.34404	0.67522	28.7061	0.932349	0.702092	0.642902	0.689551	3428.58	17.0952	3443.52	9.14847	3452.9	10.468	3452.9	10.468	99.2956
CH-20	part 1	45	177.109	267041	1.63594	3.35577	0.658562	28.4881	0.959392	0.700973	0.697558	0.727083	3424.34	18.5312	3436.04	9.41142	3443.54	10.2242	3443.54	10.2242	99.4423
CH-20	part 1	47	173.289	318699	1.21595	3.34016	0.769431	28.3956	1.04861	0.698442	0.712419	0.679392	3414.74	18.8858	3432.85	10.2856	3444.11	11.9433	3444.11	11.9433	99.1473
CH-20	part 1	48	187.578	353517	1.66462	3.34805	0.759731	28.6432	1.06866	0.70619	0.751544	0.703259	3444.08	20.0525	3441.37	10.4853	3440.46	11.796	3440.46	11.796	100.105
CH-20	part 1	49	251.007	430155	1.82737	3.39116	0.696464	28.1856	1.0032	0.700813	0.722041	0.719736	3423.73	19.179	3425.57	9.83764	3427.32	10.8245	3427.32	10.8245	99.8953
CH-20	part 1	54	162.167	273563	1.13686	3.35032	0.716902	27.8621	1.03832	0.685561	0.751063	0.723346	3365.66	19.6924	3414.26	10.178	3443.57	11.1288	3443.57	11.1288	97.7378
CH-20	part 1	55	226.556	424538	1.7154	3.34076	0.64614	28.4814	0.867395	0.698767	0.578678	0.667146	3415.97	15.3446	3435.81	8.50883	3448.07	10.0264	3448.07	10.0264	99.0692
CH-20	part 1	57	247.741	160113	1.40464	3.4027	0.69195	26.4681	1.11713	0.665063	0.876976	0.785023	3286.79	22.5808	3363.99	10.9307	3410.97	10.7693	3410.97	10.7693	96.3593
CH-20	part 1	60	237.399	388029	1.18035	3.34053	0.709406	28.4793	0.98783	0.69898	0.687407	0.695876	3416.78	18.231	3435.74	9.6903	3447.48	11.0087	3447.48	11.0087	99.1094
CH-20	part 1	62	225.121	380565	1.31951	3.34306	0.704378	27.97	0.955257	0.687154	0.645217	0.675438	3371.75	16.9404	3418.04	9.36497	3445.96	10.9324	3445.96	10.9324	97.8465
CH-20	part 1	63	270.427	372763	1.43752	3.33858	0.741313	28.0188	0.976656	0.687432	0.635843	0.651041	3372.82	16.6983	3419.75	9.57535	3448.04	11.5033	3448.04	11.5033	97.8184
CH-20	part 1	64	181.149	324174	2.05842	3.34716	0.734908	28.1259	0.998639	0.689383	0.676143	0.677065	3380.26	17.7865	3423.49	9.79217	3449.56	11.4027	3449.56	11.4027	97.9912
CH-20	part 1	67	275.573	244518	1.36168	3.40659	0.70452	27.156	1.11126	0.677454	0.859311	0.773275	3334.58	22.3717	3389.1	10.8832	3422.17	10.9556	3422.17	10.9556	97.4407
CH-20	part 1	68	103.902	205362	1.46184	3.34836	0.682877	28.6784	0.930592	0.703218	0.632072	0.679215	3432.84	16.8231	3442.57	9.13094	3448.91	10.5975	3448.91	10.5975	99.5339
CH-20	part 1	69	172.975	273345	1.36471	3.33112	0.748387	29.2538	1.03931	0.70781	0.721121	0.693845	3450.2	19.2666	3462.07	10.2045	3469.61	11.5908	3469.61	11.5908	99.4403
CH-20	part 1	70	154.385	80444	1.4476	3.35555	0.776026	28.9821	1.08481	0.706582	0.757005	0.697825	3445.56	20.2048	3452.91	10.6479	3457.85	12.043	3457.85	12.043	99.6445
CH-20	part 1	75	236.192	419617	2.30574	3.34777	0.691175	28.5331	0.977655	0.693794	0.691397	0.7072	3397.07	18.2565	3437.59	9.5911	3461.95	10.7096	3461.95	10.7096	98.1261
CH-20	part 1	76	42.1329	59317.1	1.19001	3.80179	1.27282	23.0283	1.49859	0.63626	0.788994	0.526493	3174.3	19.7777	3228.14	14.5841	3262.44	20.046	3262.44	20.046	97.2984
CH-20	part 1	78	250.938	454802	2.32592	3.34449	0.747504	28.4857	1.04109	0.692844	0.72463	0.696033	3393.46	19.1185	3435.96	10.2128	3461.51	11.5827	3461.51	11.5827	98.0341
CH-20	part 1	79	161.045	264800	1.44277	3.35559	0.756283	28.752	1.07565	0.700782	0.7648	0.711014	3423.61	20.3143	3445.09	10.5552	3458.27	11.7226	3458.27	11.7226	98.9978
CH-20	part 1	80	143.297	250429	2.39228	3.33465	1.17429	27.8856	1.60672	0.675428	1.09662	0.682522	3326.79	28.4991	3415.08	15.7508	3467.95	18.1915	3467.95	18.1915	95.9296
CH-20	part 1	82	247.488	244799	2.38779	3.36653	0.789701	28.3431	1.34726	0.693075	1.09152	0.810177	3394.34	28.8042	3431.04	13.2144	3453.21	12.2442	3453.21	12.2442	98.2951
CH-20	part 1	83	221.684	276115	1.95471	3.40068	0.656786	28.0767	0.981041	0.692973	0.728736	0.742819	3393.95	19.229	3421.78	9.61902	3438.78	10.1989	3438.78	10.1989	98.6963
CH-20	part 1	85	248.063	493584	2.12417	3.35552	0.839068	27.6094	1.14368	0.672243	0.77715	0.679516	3314.52	20.1396	3405.33	11.2073	3459.86	13.0037	3459.86	13.0037	95.7993
CH-20	part 1	88	164.129	269212	2.02872	3.33985	0.909119	27.9534	1.24993	0.677479	0.857799	0.686276	3334.68	22.3328	3417.46	12.2538	3467.02	14.0831	3467.02	14.0831	96.1829
CH-20	part 1	91	152.402	234547	2.33683	3.36957	0.740824	27.3558	1.03764	0.671838	0.726507	0.700151	3312.96	18.8204	3396.29	10.1648	3446.49	11.4977	3446.49	11.4977	96.1258
CH-20	part 1	92	181.755	278973	2.73139	3.36038	0.732686	28.7172	1.09174	0.703743	0.80934	0.741331	3434.83	21.5507	3443.9	10.7127	3449.85	11.3681	3449.85	11.3681	99.5644
CH-20	part 1	94	71.3093	133471	2.28059	3.34474	0.891755	28.5331	1.30646	0.696715	0.954754	0.730796	3408.18	25.2731	3437.59	12.817	3455.44	13.8251	3455.44	13.8251	98.6322
CH-20	part 1	96	163.094	283331	2.46946	3.35345	0.73548	27.8577	1.00992	0.68191	0.692058	0.685263	3351.68	18.0878	3414.1	9.89948	3451.61	11.4041	3451.61	11.4041	97.105
CH-20	part 1	100	258.439	226459	2.14767	3.34053	0.632111	28.3561	0.96282	0.690969	0.726213	0.754257	3386.31	19.1296	3431.49	9.44356	3458.64	9.79627	3458.64	9.79627	97.9088
CH-20	part 2	2	395.557	189063	1.50666	3.43166	0.719918	26.6738	1.30362	0.667521	1.0868	0.833676	3296.3	28.0456	3371.57	12.7591	3417.28	11.198	3417.28	11.198	96.4598
CH-20	part 2	3	257.094	234753	1.92242	3.3494	0.761143	28.6562	1.09348	0.700494	0.785064	0.717951	3422.52	20.8475	3441.82	10.729	3453.73	11.8004	3453.73	11.8004	99.0963
CH-20	part 2	4	228.943	386911	1.52033	3.34971	0.677279	28.3427	0.894513	0.692857	0.584319	0.653226	3393.5	15.4167	3431.02	8.77341	3453.68	10.4993	3453.68	10.4993	98.2578
CH-20	part 2	5	264.858	329538	2.01607	3.3662	0.612983	27.9074	0.946699	0.685586	0.721448	0.762066	3365.76	18.9163	3415.85	9.28035	3446.03	9.51329	3446.03	9.51329	97.6707
CH-20	part 2	6	165.239	154747	1.37784	3.32045	0.730303	29.5177	1.04448	0.715365	0.746443	0.714653	3478.65	20.0672	3470.89	10.2583	3467.07	11.3163	3467.07	11.3163	100.334
CH-20	part 2	7	191.066	121356	1.50785	3.39649	0.690759	28.1495	0.959396	0.697876	0.665303	0.69346	3412.59	17.6283	3424.31	9.40762	3431.85	10.7395	3431.85	10.7395	99.4387
CH-20	part 2	8	258.545	429047	1.76237	3.34099	0.750986	28.4332	1.01022	0.692808	0.67568	0.668843	3393.32	17.8265	3434.15	9.90944	3458.73	11.639	3458.73	11.639	98.1089
CH-20	part 2	11	100.643	172861	1.79525	3.36827	0.838861	28.0534	1.15669	0.688538	0.79632	0.688446	3377.04	20.9327	3420.96	11.3411	3447.46	13.0186	3447.46	13.0186	97.9573
CH-20	part 2	12	170.674	281105	1.71294	3.33565	0.721372	28.1401	0.952869	0.682268	0.6225	0.65329	3353.06	16.2749	3423.99	9.34351	3466.42	11.1747	3466.42	11.1747	96.7297
CH-20	part 2	16	104.684	169578	1.35358	3.33123	0.742118	29.2516	0.99461	0.707779	0.662126	0.665714	3450.08	17.6899	3462	9.76556	3469.56	11.494	3469.56	11.494	99.4386
CH-20	part 2	17	112.989	193038	1.49766	3.33512	0.703822	28.4813	0.975732	0.689931	0.67565	0.692454	3382.35	17.7819	3435.81	9.57164	3467.79	10.903	3467.79	10.903	97.5365
CH-20	part 2	20	315.33	252900	1.40391	3.46334	0.754876	27.1877	1.21185	0.686088	0.947974	0.782251	3367.68	24.8666	3390.25	11.869	3404.28	11.7481	3404.28	11.7481	98.9248
CH-20	part 2	21	201.939	292633	1.45832	3.35615	0.799973	28.381	1.10514	0.694016	0.762468	0.689928	3397.92	20.1369	3432.35	10.8399	3453.17	12.4031	3453.17	12.4031	98.3999
CH-20	part 2	22	256.964	464782	0.996461	3.34486	0.909709	28.8333	1.31535	0.702676	0.95004	0.72227	3430.79	25.2747	3447.86	12.9089	3458.47	14.1004	3458.47	14.1004	99.1997
CH-20	part 2	24	58.5349	90738.4	0.972568	3.83755	0.951243	22.6412	1.1466	0.632697	0.639499	0.557737	3160.25	15.9753	3211.65	11.1503	3244.58	14.9984	3244.58	14.9984	97.4008
CH-20	part 2	27	152.089	223810	0.782101	3.3361	0.63576	28.153	0.868662	0.683719	0.59182	0.681301	3358.61	15.4923	3424.44	8.5179	3463.84	9.85033	3463.84	9.85033	96.9622
CH-20	part 2	28	254.874	350563	1.36931	3.35094	0.772831	28.4598	1.09361	0.692076	0.773716	0.707489	3390.53	20.4002	3435.07	10.7278	3461.81	11.9758	3461.81	11.9758	97.9409
CH-20	part 2	29	225.725	242624	1.12204	3.33393	0.687839	28.5197	0.939039	0.690043	0.639208	0.680705	3382.78	16.8244	3437.13	9.2121	3469.62	10.6529	3469.62	10.6529	97.4971
CH-20	part 2	30	194.56	259810	1.83603	3.37309	0.687627	27.7208	1.07007	0.678587	0.819841	0.766159	3338.94	21.3654	3409.27	10.4873	3451.54	10.662	3451.54	10.662	96.7376
CH-20	part 2	31	289.835	57508.5	1.26631	3.3735	0.64447	28.3412	1.19032	0.694169	1.00052	0.84055	3398.5	26.4275	3430.97	11.6749	3450.66	10.0041	3450.66	10.0041	98.4885
CH-20	part 2	32	289.861	106553	0.877306	3.3531	0.65782	28.0825	0.879834	0.683491	0.583516	0.663211	3357.74	15.2719	3421.98	8.62671	3460.48	10.2033	3460.48	10.2033	97.0312
CH-20	part 2	33	176.778	306645	1.24908	3.3538	0.662478	28.6655	0.91479	0.70176	0.630824	0.689583	3427.32	16.7694	3442.13	8.97574	3451.43	10.2774	3451.43	10.2774	99.3014
CH-20	part 2	35	271.082	462274	0.905315	3.34269	0.639926	28.3047	0.945408	0.690607	0.695905	0.73609	3384.93	18.3256	3429.71	9.2722	3456.64	9.9179	3456.64	9.9179	97.9256
CH-20	part 2	37	294.665	506363	1.21792	3.36347	0.605588	29.128	1.16201	0.715109	0.991715	0.853448	3477.69	26.6556	3457.84	11.4077	3447.03	9.39813	3447.03	9.39813	100.889
CH-20	part 2	39	286.227	142035	1.27706	3.45257	0.644009	27.0282	0.992983	0.683608	0.75577	0.761111	3358.19	19.7822	3384.49	9.72315	3400.76	10.0243	3400.76	10.0243	98.7482
CH-20	part 2	40	282.236	554963	0.87021	3.33832	0.60803	28.2283	0.887992	0.690207	0.647165	0.728796	3383.41	17.0362	3427.06	8.70824	3453.34	9.42523	3453.34	9.42523	97.9748
CH-20	part 2	42	271.234	506435	0.977603	3.38427	0.716717	28.4668	1.05773	0.705624	0.777883	0.735428	3441.94	20.7455	3435.31	10.3759	3432.11	11.1351	3432.11	11.1351	100.286
CH-20	part 2	43	210.66	324223	1.07986	3.34503	0.60727	28.6109	0.847655	0.700997	0.591357	0.69764	3424.43	15.7102	3440.26	8.31646	3450.17	9.42208	3450.17	9.42208	99.254
CH-20	part 2	44	220.18	308536	0.640292	3.33383	0.775886	28.1291	1.09578	0.683714	0.773755	0.706125	3358.6	20.2549	3423.61	10.7448	3462.53	12.0221	3462.53	12.0221	96.9983
CH-20	part 2	45	204.783	386657	1.21137	3.35545	0.875553	27.9953	1.21974	0.684859	0.849201	0.696214	3362.98	22.252	3418.93	11.9585	3452.55	13.5763	3452.55	13.5763	97.4056
CH-20	part 2	46	243.833	211002	1.12092	3.41793	0.696255	26.3966	1.07455	0.662128	0.818392	0.761616	3275.41	21.0164	3361.35	10.5129	3413.65	10.8341	3413.65	10.8341	95.9506
CH-20	part 2	47	229.391	429949	1.16634	3.35539	0.700658	28.5519	1.14994	0.703024	0.911828	0.792934	3432.11	24.2651	3438.24	11.2817	3442.48	10.877	3442.48	10.877	99.6987
CH-20	part 2	48	353.93	540972	0.60343	3.38429	0.70778	27.1546	1.01267	0.674368	0.724254	0.715191	3322.71	18.8043	3389.06	9.91761	3429.18	10.9988	3429.18	10.9988	96.8952
CH-20	part 2	49	237.888	157194	0.844189	3.40084	0.734115	27.5905	1.35437	0.692588	1.13814	0.840347	3392.48	30.0222	3404.66	13.2718	3412.49	11.4232	3412.49	11.4232	99.4136
CH-20	part 2	51	342.828	209627	0.655343	3.91418	0.986576	21.7914	1.41173	0.629575	1.00968	0.71521	3147.91	25.1465	3174.47	13.7063	3191.99	15.6142	3191.99	15.6142	98.6189
CH-20	part 2	52	144.5	228560	1.41703	3.36485	0.725904	27.8079	1.12454	0.69061	0.858812	0.763703	3384.94	22.6156	3412.35	11.0224	3429.15	11.2814	3429.15	11.2814	98.711
CH-20	part 2	53	349.856	213003	1.07361	3.37813	0.707464	27.2026	1.09777	0.677353	0.839383	0.764625	3334.19	21.851	3390.78	10.7518	3425.06	10.9977	3425.06	10.9977	97.347
CH-20	part 2	54	352.139	486216	0.636852	3.81391	0.580335	22.4965	0.831815	0.632383	0.595903	0.716389	3159.01	14.8817	3205.41	8.08681	3235.26	9.15306	3235.26	9.15306	97.6432
CH-20	part 2	55	267.112	368138	1.0604	3.38416	0.804296	28.9545	1.39547	0.722215	1.14036	0.817187	3504.34	30.8278	3451.98	13.6972	3422.4	12.5054	3422.4	12.5054	102.394
CH-20	part 2	56	178.061	258502	1.01214	3.35216	0.66321	27.621	0.926098	0.679541	0.646285	0.697858	3342.6	16.8565	3405.74	9.07514	3443.76	10.296	3443.76	10.296	97.0623
CH-20	part 2	57	170.3	154690	0.787601	3.33734	0.665158	28.0754	0.994528	0.687724	0.739304	0.743372	3373.93	19.4203	3421.73	9.75126	3450.51	10.3204	3450.51	10.3204	97.7807
CH-20	part 2	58	170.814	331265	1.0014	3.34869	0.748021	28.5513	1.06375	0.699618	0.756295	0.710971	3419.2	20.0688	3438.22	10.436	3449.98	11.606	3449.98	11.606	99.1078
CH-20	part 2	59	225.653	345222	0.818638	3.33971	0.606382	28.1306	0.905632	0.687458	0.672642	0.742732	3372.91	17.6651	3423.66	8.88019	3454.15	9.3993	3454.15	9.3993	97.648
CH-20	part 2	61	297.413	475425	0.933653	3.3924	0.63939	28.4658	1.02629	0.706609	0.802765	0.782199	3445.66	21.4266	3435.28	10.0675	3429.89	9.93569	3429.89	9.93569	100.46
CH-20	part 2	64	301.545	410251	1.64171	3.34136	0.718268	28.5769	0.997651	0.698669	0.692385	0.694015	3415.6	18.3582	3439.1	9.78778	3453.48	11.1351	3453.48	11.1351	98.9031
CH-20	part 2	66	365.694	154308	1.00241	3.39973	1.10135	27.2925	1.61159	0.679017	1.17642	0.729975	3340.59	30.6697	3394.01	15.7867	3426.38	17.1208	3426.38	17.1208	97.4962
CH-20	part 2	69	131.727	240098	2.2857	3.34041	0.670607	28.7654	0.931655	0.699384	0.646699	0.694141	3418.31	17.1572	3445.55	9.14229	3462.08	10.3906	3462.08	10.3906	98.736
CH-20	part 2	70	213.207	392329	1.09843	3.34619	0.69161	29.2889	1.05693	0.713307	0.799229	0.756181	3470.91	21.4502	3463.25	10.3779	3459.49	10.7175	3459.49	10.7175	100.33
CH-20	part 2	72	235.307	317895	1.35916	3.34142	0.649304	29.0082	0.882369	0.705476	0.597438	0.677084	3441.38	15.9312	3453.79	8.66107	3461.67	10.0606	3461.67	10.0606	99.4138
CH-20	part 2	73	137.224	253106	0.94586	3.34621	0.728577	28.9504	1.03357	0.706313	0.733038	0.709232	3444.54	19.5607	3451.84	10.1446	3456.74	11.2936	3456.74	11.2936	99.6471
CH-20	part 2	74	258.163	451053	0.7879	3.34309	0.588759	28.8848	0.911681	0.704017	0.696063	0.763495	3435.86	18.5386	3449.61	8.94752	3458.28	9.12359	3458.28	9.12359	99.3519
CH-20	part 2	75	320.779	122048	0.830637	3.36877	0.614988	29.031	1.03938	0.713156	0.837606	0.805874	3470.34	22.4775	3454.57	10.2026	3446.1	9.55068	3446.1	9.55068	100.704
CH-20	part 2	77	207.84	365476	0.991097	3.34839	0.702299	28.884	0.968739	0.705127	0.667251	0.688783	3440.06	17.7877	3449.59	9.50754	3455.79	10.8859	3455.79	10.8859	99.5448
CH-20	part 2	78	263.853	321714	0.927398	3.36764	0.771023	28.8807	1.0607	0.707394	0.728411	0.686727	3448.63	19.4547	3449.47	10.4101	3450.63	11.9561	3450.63	11.9561	99.9418
CH-20	part 2	81	172.611	246786	1.06793	3.35228	0.760195	28.3443	1.10748	0.692783	0.805329	0.727172	3393.22	21.2466	3431.08	10.8624	3453.93	11.7858	3453.93	11.7858	98.2426
CH-20	part 2	82	181.987	278065	0.766293	3.3396	0.681388	28.9358	1.03668	0.704557	0.781236	0.753592	3437.91	20.8164	3451.34	10.175	3459.82	10.5598	3459.82	10.5598	99.3665
CH-20	part 2	83	259.717	171298	0.717945	3.36094	0.752343	29.3822	1.23818	0.720863	0.983379	0.79421	3499.28	26.5551	3466.37	12.1591	3448.08	11.6748	3448.08	11.6748	101.485
CH-20	part 2	84	321.954	399803	0.936336	3.22446	0.734078	29.1384	1.15912	0.684372	0.897026	0.773887	3361.11	23.4952	3458.19	11.3794	3515.58	11.3353	3515.58	11.3353	95.6062
CH-20	part 2	85	191.188	249384	0.693376	3.35627	0.765836	28.2299	1.04408	0.690176	0.709591	0.679635	3383.29	18.6791	3427.11	10.239	3453.5	11.8738	3453.5	11.8738	97.9669
CH-20	part 2	86	118.786	202181	0.61801	3.34093	0.723493	28.9768	1.04453	0.705216	0.753312	0.721196	3440.4	20.0834	3452.73	10.2525	3460.57	11.2124	3460.57	11.2124	99.4172
CH-20	part 2	87	290.709	361050	0.924626	3.36683	0.727244	28.7855	1.09627	0.705942	0.820297	0.748261	3443.14	21.8824	3446.23	10.758	3448.7	11.2847	3448.7	11.2847	99.839
CH-20	part 2	88	96.1291	159979	0.36069	3.82511	0.77504	23.7962	1.09981	0.663123	0.780214	0.709407	3279.27	20.0541	3260.08	10.7173	3248.97	12.2116	3248.97	12.2116	100.933
CH-20	part 2	89	159.558	281237	0.908445	3.33841	0.778085	28.8315	1.09682	0.70025	0.773036	0.704795	3421.6	20.5239	3447.8	10.764	3463.72	12.0552	3463.72	12.0552	98.7839
CH-20	part 2	91	299.185	469547	1.1439	3.33548	0.74863	29.0728	1.05707	0.707665	0.746282	0.705989	3449.65	19.9364	3455.98	10.3768	3460.32	11.6012	3460.32	11.6012	99.6916
CH-20	part 2	92	107.649	189643	0.883393	3.31425	0.718253	29.1121	0.955101	0.703984	0.629522	0.659116	3435.74	16.7659	3457.3	9.37613	3470.48	11.1229	3470.48	11.1229	98.9989
CH-20	part 2	93	161.389	217192	1.12164	3.34742	0.992831	28.1136	1.51283	0.687456	1.14143	0.754498	3372.9	29.9766	3423.06	14.8345	3453.23	15.3955	3453.23	15.3955	97.674
CH-20	part 2	94	299.375	463976	1.10462	3.3782	0.738616	29.5115	1.06831	0.728215	0.771804	0.722456	3526.76	20.9647	3470.69	10.4923	3439.15	11.4695	3439.15	11.4695	102.548
CH-20	part 2	95	147.471	220952	0.9367	3.33853	0.715586	28.8564	1.00357	0.703743	0.703494	0.700993	3434.83	18.7322	3448.65	9.84906	3457.36	11.0927	3457.36	11.0927	99.3484
CH-20	part 2	96	282.568	469568	0.82724	3.37722	0.630738	28.1873	0.987243	0.695336	0.759466	0.76928	3402.94	20.0801	3425.63	9.68115	3439.6	9.79397	3439.6	9.79397	98.9341
CH-20	part 2	97	209.534	273832	1.38531	3.36958	0.635462	28.8006	0.909092	0.708893	0.650036	0.715039	3454.28	17.3829	3446.75	8.92125	3443.04	9.86545	3443.04	9.86545	100.327
CH-20	part 2	98	199.067	310362	1.07531	3.35091	0.743747	28.5558	1.07682	0.699482	0.778701	0.723149	3418.69	20.661	3438.37	10.5643	3450.53	11.5327	3450.53	11.5327	99.077
CH-20	part 2	99	236.144	144137	0.958612	3.36552	0.747445	27.2334	1.30385	0.670082	1.06819	0.819261	3306.19	27.6287	3391.89	12.7708	3443.59	11.6055	3443.59	11.6055	96.0101
CH-20	part 2	100	125.869	237242	0.838802	3.33567	0.659705	28.8357	0.922408	0.703146	0.644671	0.6989	3432.57	17.1574	3447.94	9.0523	3457.56	10.2243	3457.56	10.2243	99.2773
EBV-S2-1		3	231.534	48120.8	0.708396	3.82695	0.890592	22.4282	1.1181	0.627633	0.675643	0.604276	3140.22	16.7952	3202.46	10.8689	3242.36	14.0425	3242.36	14.0425	96.8499
EBV-S2-1		6	133.335	44669.4	0.701256	3.76274	0.764522	23.6386	1.00278	0.650239	0.646969	0.645178	3229.14	16.4335	3253.61	9.76907	3269.4	12.0456	3269.4	12.0456	98.7686
EBV-S2-1		7	157.441	58142.3	0.98382	3.5661	0.867423	25.5627	1.17381	0.666249	0.789201	0.672341	3291.38	20.3425	3329.96	11.4705	3353.93	13.5793	3353.93	13.5793	98.135
EBV-S2-1		8	123.141	54201.4	0.957202	3.37683	0.652165	27.4193	0.855158	0.676705	0.55264	0.646243	3331.71	14.3782	3398.56	8.37778	3438.88	10.1336	3438.88	10.1336	96.8835
EBV-S2-1		9	164.421	73108.4	0.83457	3.34301	0.68329	28.1483	0.884322	0.687156	0.560023	0.633279	3371.76	14.7036	3424.27	8.67141	3455.81	10.6081	3455.81	10.6081	97.5677
EBV-S2-1		10	248.993	88506.5	1.32379	3.77809	0.685872	22.0948	0.902311	0.609614	0.585543	0.648937	3068.46	14.2959	3187.9	8.76542	3264.64	10.7966	3264.64	10.7966	93.9907
EBV-S2-1		12	283.719	16270.2	0.381973	3.70993	0.63202	21.8782	0.838491	0.594538	0.541608	0.645932	3007.79	13.0181	3178.33	8.14192	3288.51	10.0537	3288.51	10.0537	91.4639
EBV-S2-1		13	85.8114	27620.9	0.471943	3.7873	0.836609	21.8316	1.0677	0.605062	0.661036	0.619119	3050.2	16.0639	3176.27	10.3668	3257.58	13.2	3257.58	13.2	93.634
EBV-S2-1		14	67.4332	31893.3	1.02686	3.39644	0.882293	26.8736	1.14029	0.667669	0.718786	0.630357	3296.87	18.5511	3378.87	11.1633	3428.53	13.7567	3428.53	13.7567	96.1598
EBV-S2-1		17	242.319	104115	1.36997	3.76871	0.826337	22.3868	1.12228	0.616813	0.759313	0.676583	3097.23	18.6739	3200.66	10.9086	3266.83	12.9958	3266.83	12.9958	94.8084
EBV-S2-1		21	240.491	114476	0.728209	3.73433	0.690737	22.2054	0.905643	0.606621	0.585502	0.646505	3056.46	14.2512	3192.75	8.79969	3280.22	10.8537	3280.22	10.8537	93.1784
EBV-S2-1		29	119.834	35208.7	0.453885	3.79334	0.697551	23.232	0.878537	0.644919	0.530433	0.603768	3208.32	13.4063	3236.71	8.55259	3255.03	11.0276	3255.03	11.0276	98.5652
EBV-S3-1		89	235.718	295481	1.00084	3.36426	0.806628	28.8904	1.10616	0.708698	0.756906	0.684265	3453.55	20.2375	3449.8	10.8564	3448.29	12.5168	3448.29	12.5168	100.152
EBV-S3-1		91	218.795	575245	2.26232	3.34691	0.677123	28.1857	0.953385	0.68662	0.671143	0.703958	3369.71	17.613	3425.58	9.34909	3459.09	10.4932	3459.09	10.4932	97.4162
EBV-S3-1		92	198.256	399324	1.70642	3.82381	0.709733	24.1556	1.16342	0.673505	0.921847	0.792362	3319.39	23.9163	3274.69	11.344	3248.12	11.182	3248.12	11.182	102.194
EBV-S3-1		93	252.99	571250	1.929	3.34818	0.671891	27.8849	0.938584	0.681413	0.655353	0.698235	3349.78	17.121	3415.06	9.20054	3454.25	10.4153	3454.25	10.4153	96.9757
EBV-S3-1		94	249.151	410937	1.51444	3.34514	0.669741	27.6392	1.0518	0.674812	0.810992	0.771051	3324.42	21.0646	3406.38	10.3072	3455.62	10.3812	3455.62	10.3812	96.2033
EBV-S3-1		95	184.583	361078	0.964696	3.82336	0.716978	23.9957	1.16554	0.66963	0.918902	0.788389	3304.44	23.7577	3268.22	11.3617	3246.74	11.2978	3246.74	11.2978	101.777
EBV-S3-1		99	225.3	349905	1.18397	3.66275	0.580965	25.0936	0.830115	0.670226	0.592883	0.714218	3306.75	15.3368	3311.87	8.106	3315.64	9.10594	3315.64	9.10594	99.7317
FI-1	part 1	3	147.172	474186	1.62604	3.85257	0.968633	22.963	1.4457	0.647958	1.07321	0.742346	3220.22	27.2024	3225.38	14.0677	3229.26	15.2797	3229.26	15.2797	99.7203
FI-1	part 1	4	174.961	562405	1.32174	3.85753	0.803067	22.6362	1.15773	0.63955	0.833903	0.72029	3187.25	20.9694	3211.43	11.2585	3227.25	12.6742	3227.25	12.6742	98.7607
FI-1	part 1	5	223.601	341156	1.00986	3.88465	0.726586	22.5695	1.00337	0.64218	0.691937	0.689615	3197.58	17.443	3208.56	9.75607	3216.11	11.4721	3216.11	11.4721	99.4239
FI-1	part 1	6	98.8558	380640	1.86927	3.8368	0.903064	22.8757	1.30317	0.642866	0.939525	0.720952	3200.27	23.6999	3221.67	12.6786	3235.69	14.2425	3235.69	14.2425	98.9053
FI-1	part 1	7	140.338	475137	1.56278	3.86745	0.821601	22.382	1.16331	0.634005	0.823547	0.707934	3165.41	20.5991	3200.45	11.3073	3223.17	12.9658	3223.17	12.9658	98.208
FI-1	part 1	8	125.25	378182	0.791959	3.88556	0.707596	21.4169	1.06914	0.609522	0.801478	0.749646	3068.09	19.5661	3157.65	10.372	3215.75	11.1721	3215.75	11.1721	95.4081
FI-1	part 1	9	164.739	451319	1.36984	3.87534	0.714845	22.6888	1.03821	0.644008	0.752894	0.725185	3204.75	19.0126	3213.69	10.0971	3219.94	11.2833	3219.94	11.2833	99.5282
FI-1	part 1	10	207.08	511666	0.855738	3.85597	0.829423	21.9286	1.25625	0.619314	0.943499	0.751045	3107.19	23.2617	3180.57	12.2	3227.87	13.0894	3227.87	13.0894	96.2612
FI-1	part 1	11	157.515	440647	0.473559	3.87634	0.79552	21.9004	1.0864	0.6234	0.739815	0.68098	3123.43	18.314	3179.32	10.5498	3215.46	12.5619	3215.46	12.5619	97.1381
FI-1	part 1	12	122.421	505087	1.53753	3.89014	0.952864	22.3809	1.33642	0.639336	0.937055	0.701166	3186.41	23.5584	3200.41	12.9901	3209.87	15.0531	3209.87	15.0531	99.269
FI-1	part 1	13	161.44	417483	1.23235	3.89181	1.10038	22.5262	1.61271	0.643776	1.17897	0.731052	3203.84	29.7658	3206.7	15.6804	3209.16	17.3855	3209.16	17.3855	99.8342
FI-1	part 1	14	129.467	511113	1.48307	3.86699	0.688083	22.7707	0.954445	0.6466	0.661427	0.692996	3214.91	16.7436	3217.19	9.28384	3219.29	10.8612	3219.29	10.8612	99.8638
FI-1	part 1	15	286.626	269114	0.897242	3.92472	0.70784	21.676	1.24975	0.624751	1.02996	0.824131	3128.8	25.5305	3169.32	12.1307	3195.76	11.1983	3195.76	11.1983	97.9046
FI-1	part 1	16	155.191	316787	1.08053	3.91859	0.727524	22.3548	1.32634	0.643294	1.10899	0.836132	3201.95	27.9862	3199.27	12.8914	3198.27	11.5073	3198.27	11.5073	100.115
FI-1	part 1	17	142.875	464667	1.82028	3.87612	0.782693	22.9172	1.1577	0.652303	0.852997	0.736802	3237.2	21.7084	3223.43	11.2641	3215.55	12.3591	3215.55	12.3591	100.673
FI-1	part 1	18	220.423	530407	1.4035	3.8805	0.66967	22.7242	1.16602	0.647531	0.954538	0.818626	3218.55	24.1847	3215.2	11.341	3213.8	10.5746	3213.8	10.5746	100.148
FI-1	part 1	19	195.658	744834	1.12672	3.8569	0.823841	22.0985	1.3569	0.622885	1.07817	0.794585	3121.39	26.6765	3188.07	13.182	3230.97	12.9979	3230.97	12.9979	96.6083
FI-1	part 1	20	128.387	338125	1.50746	3.88676	0.951262	22.3638	1.30061	0.635286	0.886936	0.681937	3170.46	22.212	3199.66	12.6416	3218.7	15.0179	3218.7	15.0179	98.5014
FI-1	part 1	22	200.56	604809	1.38269	3.87583	0.79732	22.8795	1.11442	0.648071	0.778594	0.698653	3220.66	19.7368	3221.83	10.8422	3223.23	12.5822	3223.23	12.5822	99.9204
FI-1	part 1	23	234.933	634854	1.23823	3.89714	0.644699	21.817	0.982781	0.621375	0.741756	0.754753	3115.39	18.3253	3175.62	9.54192	3214.57	10.1796	3214.57	10.1796	96.9146
FI-1	part 1	25	218.941	568083	1.09127	3.88403	0.697668	22.5479	1.21357	0.638323	0.992971	0.818225	3182.42	24.9401	3207.63	11.7996	3224.11	11.0084	3224.11	11.0084	98.7069
FI-1	part 1	26	313.241	928334	1.42765	3.87679	0.788643	22.0283	1.19916	0.622434	0.903338	0.75331	3119.6	22.3407	3184.98	11.6478	3227.1	12.4464	3227.1	12.4464	96.6687
FI-1	part 1	27	332.99	1.08302e+06	1.64183	3.87059	0.683935	23.3088	1.07886	0.657557	0.834368	0.773378	3257.66	21.3375	3239.92	10.5043	3229.64	10.7917	3229.64	10.7917	100.868
FI-1	part 1	28	315.605	816097	1.3424	3.8632	0.733708	22.026	0.946018	0.618526	0.597177	0.631254	3104.05	14.7116	3184.88	9.18879	3236.87	11.5702	3236.87	11.5702	95.8967
FI-1	part 1	29	193.191	547623	1.3694	3.8874	1.10355	22.3997	1.5478	0.632975	1.08528	0.701181	3161.35	27.1189	3201.22	15.0455	3226.98	17.4115	3226.98	17.4115	97.9661
FI-1	part 1	30	199.776	320093	1.34026	3.87231	0.977219	22.4537	1.42659	0.632074	1.03928	0.728509	3157.79	25.9467	3203.56	13.8686	3233.03	15.4159	3233.03	15.4159	97.6727
FI-1	part 1	31	159.652	526634	1.58689	3.87694	0.767881	22.4234	1.16963	0.631942	0.882252	0.7543	3157.26	22.0234	3202.25	11.3697	3231.23	12.1149	3231.23	12.1149	97.7111
FI-1	part 1	32	198.805	632632	1.45758	3.87087	0.794741	22.019	1.16275	0.619565	0.848745	0.729945	3108.19	20.9308	3184.57	11.2939	3233.72	12.536	3233.72	12.536	96.118
FI-1	part 1	33	233.122	493194	1.30501	3.90667	0.741084	21.8425	1.04301	0.620296	0.733897	0.703636	3111.1	18.1117	3176.75	10.1272	3219.16	11.6986	3219.16	11.6986	96.6433
FI-1	part 1	34	249.653	746544	1.40782	3.86399	0.674577	22.4208	0.94258	0.628787	0.65833	0.698434	3144.79	16.3833	3202.14	9.1624	3238.94	10.6359	3238.94	10.6359	97.0932
FI-1	part 1	35	161.353	523009	1.28369	3.88023	0.740357	22.1675	0.991176	0.624309	0.659012	0.664878	3127.04	16.3284	3191.09	9.63011	3232.29	11.6794	3232.29	11.6794	96.744
FI-1	part 1	37	184.517	564988	1.58891	3.88106	0.824409	22.571	1.33883	0.635806	1.05489	0.787925	3172.51	26.4315	3208.63	13.0182	3231.96	13.0057	3231.96	13.0057	98.1606
FI-1	part 1	39	284.968	1.00528e+06	1.46966	3.87804	0.835704	21.9752	1.18687	0.617953	0.842766	0.710074	3101.77	20.7499	3182.63	11.5272	3234.68	13.181	3234.68	13.181	95.8909
FI-1	part 1	40	113.832	372759	1.4501	3.87379	0.894472	22.0492	1.19769	0.619399	0.796481	0.665012	3107.53	19.6386	3185.9	11.6341	3236.3	14.1061	3236.3	14.1061	96.0208
FI-1	part 1	41	128.042	492415	1.45825	3.85262	0.796393	22.3583	1.16156	0.624632	0.845559	0.72795	3128.32	20.9572	3199.42	11.2898	3244.99	12.5505	3244.99	12.5505	96.4049
FI-1	part 1	42	188.765	625157	1.28724	3.86082	0.793024	22.5632	1.03865	0.631689	0.670731	0.64577	3156.26	16.7391	3208.29	10.0991	3241.66	12.501	3241.66	12.501	97.3657
FI-1	part 1	43	315.579	938083	1.19957	3.87464	0.684487	21.8466	0.949475	0.613429	0.658009	0.693023	3083.72	16.1274	3176.93	9.21908	3237.02	10.7939	3237.02	10.7939	95.264
FI-1	part 1	44	159.825	500587	1.59648	3.87226	0.715603	22.6266	1.28368	0.634963	1.0657	0.830186	3169.19	26.6805	3211.02	12.4832	3237.93	11.2842	3237.93	11.2842	97.877
FI-1	part 1	45	251.808	715088	1.39943	3.86165	0.787428	22.0666	1.05456	0.617914	0.701463	0.66517	3101.61	17.2702	3186.66	10.244	3241.33	12.4129	3241.33	12.4129	95.6893
FI-1	part 1	46	133.889	416453	1.47233	3.8613	1.07035	22.6563	1.49278	0.634393	1.04053	0.697043	3166.94	26.0362	3212.29	14.5177	3241.42	16.8732	3241.42	16.8732	97.7023
FI-1	part 1	47	162.289	505461	1.53425	3.86642	0.680956	22.0461	0.93128	0.618117	0.635268	0.682144	3102.42	15.6436	3185.76	9.04599	3239.35	10.7363	3239.35	10.7363	95.7729
FI-1	part 1	48	215.835	63956.7	1.16816	3.85935	0.790259	22.052	1.12466	0.617873	0.799094	0.710519	3101.45	19.6731	3186.02	10.9247	3240.39	12.4764	3240.39	12.4764	95.712
FI-1	part 1	50	218.034	675940	1.8532	3.85974	0.822529	21.9923	1.1954	0.615905	0.867413	0.725626	3093.6	21.3129	3183.39	11.6105	3241.15	12.9665	3241.15	12.9665	95.4476
FI-1	part 1	51	118.917	372857	1.48297	3.88979	0.892328	21.8372	1.12966	0.616418	0.69269	0.613183	3095.65	17.0286	3176.52	10.9686	3228.68	14.0816	3228.68	14.0816	95.8799
FI-1	part 1	54	152.641	515194	1.67769	3.87871	0.782672	22.6052	1.13827	0.63604	0.82648	0.726085	3173.43	20.713	3210.1	11.0686	3233.77	12.3455	3233.77	12.3455	98.1342
FI-1	part 1	55	171.77	647244	1.5119	3.86528	0.709849	22.4067	1.04354	0.628261	0.764907	0.732989	3142.71	19.0259	3201.53	10.1436	3239.27	11.1919	3239.27	11.1919	97.0191
FI-1	part 1	57	191.93	659384	1.62453	3.87067	0.761667	22.0363	1.04144	0.618951	0.710252	0.68199	3105.74	17.5047	3185.33	10.1159	3236.53	12.0114	3236.53	12.0114	95.9591
FI-1	part 1	58	259.69	526238	1.31087	3.93691	1.03089	22.2464	1.64016	0.636825	1.27568	0.777779	3176.52	31.9949	3194.55	15.9388	3206.57	16.2905	3206.57	16.2905	99.0631
FI-1	part 1	59	149.414	463066	1.75723	3.87869	0.793989	22.24	1.10619	0.627235	0.770209	0.696274	3138.64	19.1385	3194.27	10.7491	3230.07	12.5278	3230.07	12.5278	97.1696
FI-1	part 1	60	164.436	555556	1.29157	3.87342	0.728594	22.2699	1.02121	0.627215	0.71554	0.700682	3138.56	17.7797	3195.58	9.92386	3232.24	11.494	3232.24	11.494	97.1019
FI-1	part 1	62	242.31	552844	0.807498	3.87546	0.789906	21.7309	1.12992	0.613	0.807908	0.715013	3082	19.7928	3171.78	10.9687	3229.75	12.4642	3229.75	12.4642	95.4254
FI-1	part 1	63	179.478	659116	1.54336	3.86388	0.84126	22.5269	1.13979	0.633534	0.76901	0.674695	3163.55	19.2262	3206.73	11.0818	3234.52	13.269	3234.52	13.269	97.8058
FI-1	part 1	64	137.587	455803	1.57922	3.85975	0.90648	22.9564	1.38733	0.644943	1.05022	0.75701	3208.42	26.5443	3225.1	13.4995	3236.16	14.2957	3236.16	14.2957	99.1428
FI-1	part 1	66	100.144	311630	0.674263	3.87178	0.821371	22.4279	1.26475	0.632086	0.961689	0.760378	3157.84	24.0098	3202.45	12.2945	3231.19	12.9596	3231.19	12.9596	97.7299
FI-1	part 1	67	109.572	238045	1.80564	3.93328	0.998743	21.7694	1.25312	0.623301	0.756716	0.603866	3123.04	18.7306	3173.5	12.1657	3206.24	15.7842	3206.24	15.7842	97.4051
FI-1	part 1	68	228.142	706986	1.32779	3.88063	0.746687	22.3893	0.966968	0.633317	0.614395	0.635384	3162.69	15.3574	3200.77	9.39891	3225.4	11.7809	3225.4	11.7809	98.0559
FI-1	part 1	69	305.647	994943	1.0243	3.86654	0.653386	22.9141	1.0015	0.645184	0.758998	0.757864	3209.36	19.188	3223.3	9.74408	3232.66	10.307	3232.66	10.307	99.2793
FI-1	part 1	71	159.003	554969	1.91657	3.88486	0.827426	22.5949	1.28107	0.639232	0.977995	0.76342	3186	24.5853	3209.66	12.4571	3225.15	13.0558	3225.15	13.0558	98.786
FI-1	part 1	72	134.064	467969	1.86047	3.87308	0.798166	23.2908	1.48126	0.656931	1.24779	0.842389	3255.23	31.8919	3239.17	14.4222	3229.92	12.5944	3229.92	12.5944	100.783
FI-1	part 1	73	232.022	839900	1.35681	3.86643	0.753198	22.8112	1.05965	0.642273	0.74535	0.703391	3197.95	18.7912	3218.92	10.308	3232.69	11.8817	3232.69	11.8817	98.9251
FI-1	part 1	75	104.765	398620	1.54416	3.86087	1.0219	23.1009	1.38899	0.648534	0.940732	0.67728	3222.47	23.8573	3231.2	13.5191	3237.3	16.1146	3237.3	16.1146	99.542
FI-1	part 1	77	249.824	783913	0.811696	3.86417	0.763577	22.2152	1.17578	0.624169	0.894097	0.760427	3126.49	22.1501	3193.18	11.4249	3236.03	12.042	3236.03	12.042	96.6149
FI-1	part 1	79	106.555	156103	1.58232	3.84736	0.850577	22.7233	1.09489	0.635999	0.689097	0.629375	3173.27	17.2692	3215.17	10.6491	3242.08	13.4117	3242.08	13.4117	97.8776
FI-1	part 1	81	134.73	368218	0.982514	3.88834	0.881799	21.6681	1.21994	0.612836	0.843003	0.69102	3081.35	20.6492	3168.97	11.8411	3225.6	13.9135	3225.6	13.9135	95.5278
FI-1	part 1	82	282.732	758989	1.03752	3.87458	0.682932	22.1533	1.10728	0.624305	0.871576	0.787132	3127.03	21.5951	3190.47	10.7579	3231.29	10.7746	3231.29	10.7746	96.7733
FI-1	part 1	83	301.205	884566	0.969551	3.88189	0.748352	22.3515	1.0709	0.630564	0.766014	0.715303	3151.82	19.0962	3199.13	10.4084	3229.6	11.8082	3229.6	11.8082	97.5916
FI-1	part 1	84	209.411	622069	0.820141	3.87179	0.747053	22.0851	1.20611	0.62144	0.946885	0.785076	3115.65	23.3946	3187.48	11.7166	3233.68	11.7838	3233.68	11.7838	96.3499
FI-1	part 1	85	334.906	1.21341e+06	1.76874	3.86975	0.907068	22.7532	1.24865	0.639882	0.858109	0.68723	3188.55	21.5849	3216.45	12.1454	3234.56	14.3068	3234.56	14.3068	98.5776
FI-1	part 1	86	159.513	593781	1.66643	3.88071	0.613132	23.1082	0.884964	0.651729	0.638115	0.721063	3234.96	16.231	3231.51	8.61325	3230.05	9.67459	3230.05	9.67459	100.152
FI-1	part 1	87	166.45	391625	2.24627	3.91065	0.729487	22.0109	1.08627	0.625593	0.804852	0.740931	3132.13	19.9671	3184.21	10.5509	3217.86	11.5165	3217.86	11.5165	97.3361
FI-1	part 1	88	148.45	413300	1.23373	3.87158	0.85219	22.582	1.11697	0.634404	0.722055	0.646441	3166.98	18.0674	3209.1	10.861	3236.21	13.4396	3236.21	13.4396	97.8607
FI-1	part 1	89	274.184	1.00775e+06	1.00442	3.87108	0.75778	23.2537	1.07593	0.653526	0.763797	0.709896	3241.97	19.4603	3237.62	10.4747	3235.61	11.951	3235.61	11.951	100.197
FI-1	part 1	90	158.813	541727	1.28625	3.87088	0.838176	22.9491	1.15273	0.646498	0.791342	0.686496	3214.51	20.0304	3224.79	11.2163	3231.86	13.2232	3231.86	13.2232	99.463
FI-1	part 1	91	202.002	590288	0.447728	3.86495	0.752268	21.7604	1.2234	0.613325	0.964763	0.788593	3083.3	23.6434	3173.09	11.8769	3231.05	11.8688	3231.05	11.8688	95.4273
FI-1	part 1	92	169.01	541351	1.63959	3.86664	0.91153	22.5482	1.27518	0.635675	0.891729	0.699297	3171.99	22.3404	3207.65	12.3987	3230.69	14.3818	3230.69	14.3818	98.1832
FI-1	part 1	93	245.483	820679	0.907237	3.87853	0.660984	22.5335	0.952058	0.637198	0.685209	0.719714	3177.99	17.1916	3207.01	9.25652	3225.89	10.4327	3225.89	10.4327	98.5153
FI-1	part 1	94	171.997	562181	1.1435	3.9068	0.660543	22.8568	0.950125	0.651399	0.682932	0.718781	3233.67	17.3657	3220.86	9.24327	3213.58	10.4308	3213.58	10.4308	100.625
FI-1	part 1	95	319.004	316553	1.14209	3.9731	0.751394	20.9655	1.27442	0.607677	1.02934	0.807694	3060.69	25.0815	3137	12.3517	3186.87	11.8959	3186.87	11.8959	96.0408
FI-1	part 1	96	299.917	833252	0.821877	3.86859	0.686831	22.8319	0.945105	0.644311	0.649213	0.686922	3205.94	16.399	3219.8	9.19401	3229.13	10.8379	3229.13	10.8379	99.2819
FI-1	part 1	97	179.603	507217	1.16997	3.87847	0.70089	23.1922	1.00414	0.656171	0.719052	0.716085	3252.27	18.365	3235.04	9.77476	3225.05	11.0586	3225.05	11.0586	100.844
FI-1	part 1	98	182.219	552873	1.49302	3.85955	0.663579	22.5882	0.975673	0.635959	0.71526	0.733094	3173.11	17.9242	3209.37	9.4871	3232.78	10.4678	3232.78	10.4678	98.1543
FI-1	part 1	99	130.649	408166	1.38906	3.86259	0.693686	22.7429	0.964582	0.641332	0.67023	0.69484	3194.25	16.8822	3216.01	9.38196	3230.28	10.945	3230.28	10.945	98.8846
FI-1	part 1	100	106.639	375371	1.46714	3.88515	0.760351	22.714	1.08112	0.644263	0.768557	0.710887	3205.75	19.4128	3214.77	10.515	3221.07	12.0007	3221.07	12.0007	99.5243
FI-1	part 2	3	177.675	272944	1.23778	3.86896	0.908743	22.3019	1.26906	0.630715	0.88581	0.698006	3152.42	22.0859	3196.97	12.3334	3225.72	14.3387	3225.72	14.3387	97.7276
FI-1	part 2	4	151.847	290134	1.61254	3.86621	1.21478	22.7754	1.69334	0.643642	1.17965	0.696645	3203.32	29.7792	3217.39	16.4721	3226.85	19.1679	3226.85	19.1679	99.2706
FI-1	part 2	5	177.668	395939	1.6181	3.85524	0.823859	22.8406	1.04513	0.643629	0.643038	0.61527	3203.27	16.2326	3220.17	10.1673	3231.4	12.9982	3231.4	12.9982	99.1295
FI-1	part 2	6	165.851	164256	1.21862	3.87904	0.69742	22.5453	1.07548	0.639326	0.81864	0.761184	3186.37	20.5811	3207.52	10.4568	3221.45	11.0077	3221.45	11.0077	98.9109
FI-1	part 2	8	63.3041	15472	1.5321	3.7755	1.08289	24.2586	1.70908	0.670755	1.31412	0.768907	3308.79	34.0102	3278.84	16.6682	3261.26	17.1931	3261.26	17.1931	101.457
FI-1	part 2	9	172.72	170532	0.814762	3.92152	0.721331	20.8992	1.23025	0.598852	0.996394	0.809913	3025.21	24.0582	3133.93	11.9219	3205	11.4025	3205	11.4025	94.3903
FI-1	part 2	10	105.347	178800	1.50574	3.88508	0.773381	21.719	1.13467	0.61655	0.830167	0.731637	3096.18	20.411	3171.25	11.0146	3219.77	12.2093	3219.77	12.2093	96.1614
FI-1	part 2	11	144.611	216566	0.90643	3.8884	0.906142	21.4647	1.25601	0.610069	0.869704	0.692434	3070.28	21.2435	3159.82	12.1862	3217.86	14.3067	3217.86	14.3067	95.4138
FI-1	part 2	12	106.242	197148	1.47067	3.86788	1.39681	21.7487	1.91862	0.615346	1.31524	0.685515	3091.37	32.2984	3172.57	18.6271	3225.01	22.0442	3225.01	22.0442	95.856
FI-1	part 2	13	107.898	245041	1.30928	3.87225	1.19088	22.5234	1.69546	0.638734	1.2068	0.711779	3184.04	30.3226	3206.58	16.4851	3221.38	18.7982	3221.38	18.7982	98.8408
FI-1	part 2	14	79.355	157866	1.71733	3.88698	0.901393	22.0962	1.13349	0.629062	0.686972	0.606067	3145.88	17.1007	3187.97	11.0114	3215.23	14.237	3215.23	14.237	97.8429
FI-1	part 2	15	93.2415	188624	1.63839	3.86886	1.00584	22.3707	1.3627	0.633878	0.919253	0.67458	3164.91	22.9901	3199.96	13.2454	3222.68	15.8764	3222.68	15.8764	98.2073
FI-1	part 2	16	147.603	288536	1.57858	3.87364	0.829009	22.2338	1.31453	0.630732	1.02014	0.776045	3152.48	25.4355	3194	12.7737	3220.85	13.0854	3220.85	13.0854	97.8773
FI-1	part 2	17	105.426	211119	1.96711	3.8678	0.820411	22.6729	1.12682	0.642251	0.772232	0.685318	3197.86	19.4685	3213.01	10.9587	3223.16	12.9498	3223.16	12.9498	99.2151
FI-1	part 2	18	181.791	224969	1.20052	3.86979	0.762263	22.5719	1.2164	0.639711	0.947854	0.77923	3187.88	23.8384	3208.67	11.8277	3222.36	12.0311	3222.36	12.0311	98.9299
FI-1	part 2	19	135.327	274347	1.49424	3.87314	0.863168	22.0744	1.12843	0.626765	0.726777	0.644061	3136.78	18.051	3187.01	10.9617	3219.45	13.6264	3219.45	13.6264	97.4322
FI-1	part 2	20	113.051	151673	1.56404	3.88285	0.81802	22.1392	1.05748	0.630258	0.66983	0.633422	3150.61	16.6934	3189.85	10.2738	3215.3	12.9209	3215.3	12.9209	97.988
FI-1	part 2	21	117.446	235418	1.43516	3.88675	0.763337	21.7079	1.01974	0.61854	0.676098	0.663012	3104.11	16.6561	3170.75	9.89857	3213.88	12.055	3213.88	12.055	96.5845
FI-1	part 2	23	112.096	196625	1.85418	3.88637	0.815515	21.7558	1.06148	0.619868	0.67942	0.640068	3109.39	16.7601	3172.89	10.3048	3213.98	12.8791	3213.98	12.8791	96.746
FI-1	part 2	24	106.301	186043	1.23694	3.86616	0.783392	22.577	1.13104	0.639334	0.815676	0.721171	3186.4	20.5068	3208.89	10.9978	3223.65	12.3642	3223.65	12.3642	98.8445
FI-1	part 2	25	114.282	231129	1.44498	3.86759	0.628664	22.4192	0.975646	0.635071	0.746038	0.764661	3169.61	18.6795	3202.07	9.48381	3223.13	9.92094	3223.13	9.92094	98.3396
FI-1	part 2	28	145.255	274160	1.4808	3.8596	0.770226	22.1371	1.02017	0.625768	0.668866	0.655644	3132.83	16.5964	3189.76	9.91121	3226.44	12.1575	3226.44	12.1575	97.0987
FI-1	part 2	29	165.001	208802	0.893696	3.86392	0.739376	21.5113	1.13264	0.60879	0.857906	0.757438	3065.16	20.928	3161.92	10.9902	3224.6	11.6684	3224.6	11.6684	95.0556
FI-1	part 2	30	88.6599	172682	1.7383	3.86759	0.867947	22.4232	1.21035	0.635223	0.843258	0.696703	3170.21	21.1169	3202.24	11.7656	3223.04	13.7022	3223.04	13.7022	98.361
FI-1	part 2	31	152.068	309474	1.16641	3.8944	1.34951	22.0994	1.97213	0.630324	1.43809	0.729205	3150.87	35.8425	3188.1	19.1601	3212.3	21.318	3212.3	21.318	98.0877
FI-1	part 2	32	73.1142	138090	1.6092	3.89937	0.885372	22.7529	1.24083	0.6499	0.869277	0.70056	3227.81	22.0733	3216.43	12.0693	3210.02	13.9875	3210.02	13.9875	100.554
FI-1	part 2	33	127.898	280269	1.46009	3.87772	0.73769	22.516	1.19094	0.64115	0.934934	0.785036	3193.54	23.5457	3206.26	11.5789	3214.9	11.6488	3214.9	11.6488	99.3356
FI-1	part 2	34	122.482	205036	1.39214	3.84227	0.813865	22.7298	1.10315	0.638966	0.744641	0.675011	3184.95	18.7143	3215.45	10.7296	3235.2	12.8368	3235.2	12.8368	98.4467
FI-1	part 2	35	124.184	276769	1.10994	3.86525	0.821678	22.6091	1.03983	0.63934	0.637177	0.612771	3186.42	16.0192	3210.27	10.1114	3225.87	12.965	3225.87	12.965	98.777
FI-1	part 2	36	87.4616	175691	1.4221	3.87381	0.88094	22.3724	1.22763	0.634105	0.854724	0.696236	3165.8	21.3809	3200.04	11.9324	3222.24	13.9075	3222.24	13.9075	98.2484
FI-1	part 2	37	135.669	250464	1.18555	3.86917	0.742911	22.8794	1.00174	0.64765	0.671926	0.670756	3219.02	17.0262	3221.83	9.74589	3224.25	11.7233	3224.25	11.7233	99.8378
FI-1	part 2	38	103.469	219901	1.56251	3.87874	0.911783	22.9211	1.28925	0.649331	0.911334	0.706871	3225.59	23.129	3223.6	12.5442	3223.04	14.3919	3223.04	14.3919	100.079
FI-1	part 2	39	93.3881	174064	1.4732	3.8733	0.787914	22.7915	1.14338	0.644116	0.828318	0.724448	3205.18	20.9194	3218.08	11.1221	3226.81	12.4391	3226.81	12.4391	99.3296
FI-1	part 2	40	110.812	210194	1.25862	3.8758	0.826316	22.7465	1.20628	0.643235	0.878792	0.728512	3201.72	22.1756	3216.16	11.7331	3225.85	13.0377	3225.85	13.0377	99.252
FI-1	part 2	41	160.74	355651	1.42701	3.87032	0.660734	22.6188	0.976967	0.638668	0.719578	0.736542	3183.78	18.0793	3210.68	9.50023	3228.21	10.428	3228.21	10.428	98.6236
FI-1	part 2	42	79.4408	153585	1.40935	3.88481	0.991096	22.8959	1.50142	0.649012	1.1278	0.751154	3224.34	28.6142	3222.53	14.6082	3222.08	15.6431	3222.08	15.6431	100.07
FI-1	part 2	43	80.2221	127693	1.53787	3.88018	0.973056	22.9831	1.32335	0.648527	0.896825	0.677691	3222.45	22.7436	3226.23	12.8775	3229.25	15.3504	3229.25	15.3504	99.7892
FI-1	part 2	44	110.613	208484	1.70654	3.84999	0.879449	23.1124	1.18636	0.647019	0.796082	0.671028	3216.55	20.1602	3231.68	11.547	3241.77	13.8654	3241.77	13.8654	99.222
FI-1	part 2	46	177.186	300170	1.13409	3.89088	0.70926	22.7971	1.08913	0.644201	0.826523	0.758883	3205.51	20.8757	3218.32	10.5945	3226.99	11.1938	3226.99	11.1938	99.3345
FI-1	part 2	47	85.5471	159235	1.07173	3.89556	0.83652	22.0418	1.3511	0.623685	1.06097	0.785258	3124.57	26.2715	3185.57	13.1242	3224.89	13.2	3224.89	13.2	96.8889
FI-1	part 2	48	124.57	218723	1.46906	3.87745	0.791746	22.7114	1.2624	0.640324	0.983188	0.778827	3190.29	24.7416	3214.66	12.2782	3230.57	12.493	3230.57	12.493	98.7531
FI-1	part 2	49	184.231	214558	0.815854	3.89021	0.744146	21.7031	1.03953	0.613915	0.725741	0.698145	3085.66	17.7963	3170.54	10.0906	3225.38	11.7426	3225.38	11.7426	95.6682
FI-1	part 2	50	118.567	291260	1.38579	3.87197	0.757467	22.6082	1.2686	0.636484	1.01762	0.802161	3175.18	25.5142	3210.23	12.3361	3232.88	11.9491	3232.88	11.9491	98.2154
FI-1	part 2	52	185.346	368943	1.07296	3.86851	0.694332	22.9394	0.950338	0.645211	0.648846	0.682753	3209.47	16.4037	3224.37	9.24675	3234.33	10.952	3234.33	10.952	99.2312
FI-1	part 2	53	93.8925	165949	1.72588	3.91457	0.838804	22.8019	1.07854	0.64907	0.677938	0.62857	3224.57	17.2013	3218.52	10.4916	3215.43	13.2454	3215.43	13.2454	100.284
FI-1	part 2	55	126.865	214388	1.14836	3.88915	0.723046	23.2167	0.975481	0.659108	0.65472	0.671177	3263.69	16.767	3236.07	9.49613	3219.67	11.4139	3219.67	11.4139	101.367
FI-1	part 2	56	161.352	321866	1.29642	3.86528	0.716509	22.5808	1.06936	0.638737	0.793712	0.742233	3184.05	19.9432	3209.05	10.398	3225.39	11.3064	3225.39	11.3064	98.7183
FI-1	part 2	58	153.068	162087	1.20646	3.88867	0.736039	21.7152	1.04192	0.618417	0.737357	0.707692	3103.62	18.163	3171.08	10.114	3214.72	11.6237	3214.72	11.6237	96.5439
FI-1	part 2	59	169.519	239666	0.673596	3.87931	0.697778	20.185	1.25713	0.573406	1.04559	0.831726	2921.79	24.5643	3100.26	12.1628	3218.66	11.0171	3218.66	11.0171	90.7768
FI-1	part 2	60	101.208	200286	1.31944	3.85983	0.8358	22.9764	1.32844	0.649444	1.03255	0.777262	3226.03	26.2081	3225.94	12.9269	3226.56	13.1867	3226.56	13.1867	99.9836
FI-1	part 2	61	95.0011	177722	1.2578	3.84838	0.884734	23.6999	1.34154	0.669836	1.00827	0.751578	3305.24	26.0732	3256.13	13.071	3226.7	13.9617	3226.7	13.9617	102.434
FI-1	part 2	62	93.1619	164623	1.3671	3.8832	0.746654	22.9551	1.17136	0.654671	0.902485	0.770462	3246.43	23.0182	3225.04	11.3977	3212.45	11.793	3212.45	11.793	101.058
FI-1	part 2	64	155.182	143761	0.947881	3.87469	0.70791	21.9604	0.99624	0.622191	0.700648	0.703292	3118.63	17.3237	3181.98	9.67537	3222.84	11.176	3222.84	11.176	96.7665
FI-1	part 2	65	133.083	265026	0.823479	3.87414	0.752101	22.4758	1.35287	0.636617	1.12453	0.831219	3175.71	28.1983	3204.52	13.1524	3223.27	11.8686	3223.27	11.8686	98.5242
FI-1	part 2	66	96.4344	192767	1.3685	3.86792	0.954961	22.7436	1.35873	0.643205	0.966388	0.711243	3201.6	24.3854	3216.03	13.216	3225.72	15.0703	3225.72	15.0703	99.2523
FI-1	part 2	67	140.856	289259	1.5467	3.88252	0.721764	22.4794	1.16599	0.638089	0.915669	0.785317	3181.5	22.9934	3204.67	11.3355	3219.88	11.3937	3219.88	11.3937	98.8079
FI-1	part 2	68	103.379	199629	1.38237	3.86532	0.715516	22.8483	1.03982	0.648595	0.754449	0.725555	3222.71	19.1341	3220.5	10.1158	3219.8	11.2945	3219.8	11.2945	100.091
FI-1	part 2	69	176.532	234051	1.36484	3.87314	0.754906	22.881	1.03157	0.650442	0.702996	0.681481	3229.93	17.86	3221.9	10.0361	3217.57	11.9182	3217.57	11.9182	100.384
FI-1	part 2	70	120.498	213477	0.826442	3.87353	0.79275	22.2647	1.12703	0.632995	0.800999	0.710719	3161.42	20.0155	3195.34	10.9522	3217.38	12.5169	3217.38	12.5169	98.2607
FI-1	part 2	71	123.525	230470	1.29558	3.86798	0.7718	22.5587	1.13491	0.640427	0.832013	0.733111	3190.7	20.9393	3208.1	11.0349	3219.67	12.1835	3219.67	12.1835	99.1001
FI-1	part 2	72	190.816	349632	1.50053	3.85972	0.761768	22.2765	1.11942	0.631026	0.820238	0.732735	3153.65	20.4572	3195.86	10.8785	3223.14	12.0212	3223.14	12.0212	97.8438
FI-1	part 2	73	122.522	267584	1.33477	3.8658	0.678516	23.1154	1.01059	0.655843	0.748916	0.74107	3250.99	19.122	3231.81	9.83614	3220.6	10.7091	3220.6	10.7091	100.944
FI-1	part 2	74	150.878	275086	1.14965	3.86767	0.790686	22.1762	1.12151	0.626289	0.795273	0.709108	3134.89	19.743	3191.48	10.8967	3227.92	12.4793	3227.92	12.4793	97.1182
FI-1	part 2	75	137.036	330117	1.35682	3.88008	0.792593	22.6704	1.0481	0.642284	0.685758	0.654287	3197.99	17.289	3212.9	10.193	3222.9	12.5083	3222.9	12.5083	99.227
FI-1	part 2	77	191.21	129201	0.613296	3.86525	0.734964	21.4587	1.33372	0.605751	1.11266	0.834254	3052.97	27.0582	3159.55	12.9401	3228.63	11.6044	3228.63	11.6044	94.5591
FI-1	part 2	78	97.1477	187684	1.78351	3.8367	0.873027	22.7014	1.24576	0.636029	0.888641	0.713333	3173.39	22.2706	3214.23	12.1161	3240.49	13.7636	3240.49	13.7636	97.9292
FI-1	part 2	79	146.954	338641	1.2175	3.88508	0.893734	22.3403	1.26547	0.633745	0.895897	0.707957	3164.38	22.4031	3198.64	12.2994	3220.87	14.1069	3220.87	14.1069	98.2462
FI-1	part 2	80	94.7408	175855	1.16574	3.87026	0.794139	21.7254	1.42144	0.614021	1.17889	0.829366	3086.08	28.9114	3171.53	13.7988	3226.73	12.529	3226.73	12.529	95.6413
FI-1	part 2	83	111.909	211399	1.49425	3.85678	0.829054	23.2657	1.23946	0.653205	0.921356	0.743352	3240.71	23.4677	3238.12	12.0672	3237.19	13.0738	3237.19	13.0738	100.109
FI-1	part 2	85	125.002	234135	1.22517	3.85783	0.743762	23.4206	1.05788	0.657719	0.752278	0.711116	3258.29	19.241	3244.58	10.3021	3236.79	11.7289	3236.79	11.7289	100.664
FI-1	part 2	86	129.769	268718	1.50219	3.87452	0.737302	22.5516	1.01504	0.636042	0.697608	0.687269	3173.44	17.4833	3207.79	9.86928	3230.02	11.6338	3230.02	11.6338	98.2485
FI-1	part 2	87	104.453	157205	1.64119	3.8572	0.932012	22.6846	1.21706	0.637004	0.782631	0.643048	3177.23	19.6322	3213.51	11.8366	3236.91	14.6981	3236.91	14.6981	98.1561
FI-1	part 2	88	132.856	276339	1.46074	3.85847	0.86043	22.93	1.19393	0.647051	0.827688	0.693249	3216.67	20.9613	3223.98	11.6168	3229.2	13.5776	3229.2	13.5776	99.6122
FI-1	part 2	89	123.248	239877	1.11022	3.884	0.815764	22.635	1.05983	0.642179	0.676532	0.638338	3197.57	17.0547	3211.38	10.3064	3220.69	12.8766	3220.69	12.8766	99.2822
FI-1	part 2	90	146.963	69689.2	1.31913	3.88596	0.710415	21.2453	1.45111	0.604036	1.26439	0.871323	3046.08	30.6938	3149.85	14.0729	3217.33	11.2414	3217.33	11.2414	94.6772
FI-1	part 2	92	88.9791	174095	1.59407	3.88471	0.863647	22.0951	1.15171	0.627943	0.761795	0.661446	3141.45	18.9426	3187.92	11.1884	3217.97	13.6367	3217.97	13.6367	97.6222
FI-1	part 2	93	131.236	227266	1.18161	3.8677	0.759409	22.5419	1.0224	0.637798	0.684527	0.669527	3180.35	17.1843	3207.37	9.94067	3224.99	11.9824	3224.99	11.9824	98.6161
FI-1	part 2	94	95.1495	158317	1.03813	3.87058	0.7404	21.7021	1.00785	0.614359	0.683706	0.678379	3087.43	16.773	3170.49	9.78309	3224.16	11.6841	3224.16	11.6841	95.7592
FI-1	part 2	95	149.524	234316	1.31663	3.87505	0.941637	22.6729	1.30243	0.642526	0.899776	0.690846	3198.94	22.6899	3213.01	12.6666	3222.48	14.8616	3222.48	14.8616	99.2695
FI-1	part 2	97	168.162	333415	1.01442	3.87148	0.620652	20.7942	1.29249	0.588714	1.13372	0.877156	2984.2	27.0822	3129.05	12.5222	3224.01	9.79284	3224.01	9.79284	92.5618
FI-1	part 2	98	140.757	299729	1.08002	3.87613	0.804734	22.0924	1.12139	0.626226	0.780948	0.696412	3134.65	19.3862	3187.8	10.8937	3222.1	12.7006	3222.1	12.7006	97.286
FI-1	part 2	99	173.575	390091	1.14883	3.87098	0.693677	22.3085	0.958541	0.632203	0.661447	0.690056	3158.3	16.5157	3197.26	9.31555	3222.47	10.9478	3222.47	10.9478	98.0086
FI-1	part 2	100	128.111	250754	1.81761	3.88114	0.779262	22.1513	1.13752	0.629434	0.82863	0.728452	3147.35	20.6345	3190.39	11.0517	3218.23	12.3025	3218.23	12.3025	97.7974
FI-2	part 1	1	172.563	47109.6	1.78765	3.87138	0.692286	24.1395	0.971476	0.683605	0.677498	0.69739	3358.18	17.7334	3274.04	9.4721	3223.59	10.9863	3223.59	10.9863	104.175
FI-2	part 1	3	193.993	62469.6	1.78509	3.87325	0.650405	24.2274	0.920712	0.686223	0.650089	0.706072	3368.19	17.0546	3277.59	8.97841	3223.3	10.2879	3223.3	10.2879	104.495
FI-2	part 1	4	202.668	40776.6	1.56422	3.91198	0.717973	22.5321	1.33682	0.644829	1.12669	0.84282	3207.97	28.4742	3206.95	12.9977	3207	11.367	3207	11.367	100.03
FI-2	part 1	9	232.378	65520.4	1.92477	3.86888	0.628486	24.3999	0.908721	0.689964	0.655734	0.721601	3382.48	17.2582	3284.51	8.86396	3225.91	9.92964	3225.91	9.92964	104.854
FI-2	part 1	10	165.188	40051.2	2.26968	3.88373	0.781305	23.4821	1.17749	0.666831	0.879682	0.747083	3293.63	22.6866	3247.14	11.4682	3219.22	12.3553	3219.22	12.3553	102.311
FI-2	part 1	11	272.503	60025.4	1.62493	3.86275	0.751274	23.1348	1.06442	0.652311	0.753102	0.707523	3237.23	19.1662	3232.63	10.3605	3230.45	11.8682	3230.45	11.8682	100.21
FI-2	part 1	12	235.83	55396.3	1.3732	3.88574	0.746726	22.834	0.991464	0.647703	0.651311	0.656918	3219.22	16.5046	3219.9	9.64506	3220.99	11.7981	3220.99	11.7981	99.9452
FI-2	part 1	13	244.046	34598	1.61969	3.90455	0.832979	22.4705	1.21231	0.640769	0.878936	0.725011	3192.04	22.1274	3204.29	11.7856	3212.65	13.187	3212.65	13.187	99.3584
FI-2	part 1	14	181.907	50356.5	1.64267	3.87668	0.669106	23.1407	0.879447	0.654671	0.566137	0.643742	3246.43	14.4395	3232.88	8.56006	3225.15	10.6228	3225.15	10.6228	100.66
FI-2	part 1	15	226.119	64895.8	1.56034	3.8651	0.934112	24.1591	1.30312	0.681311	0.908008	0.696796	3349.39	23.7196	3274.83	12.7064	3230.18	14.7477	3230.18	14.7477	103.691
FI-2	part 1	17	188.098	43582.1	2.02291	3.85544	0.679768	23.4545	0.982189	0.659992	0.708254	0.721098	3267.12	18.1527	3245.99	9.56544	3233.64	10.7338	3233.64	10.7338	101.036
FI-2	part 1	18	218.634	59090.3	1.85664	3.86321	0.785511	23.4931	1.12832	0.662249	0.809126	0.717109	3275.88	20.7807	3247.59	10.9894	3230.85	12.4071	3230.85	12.4071	101.394
FI-2	part 1	19	206.268	6106.55	1.23591	3.84462	0.828466	22.8876	1.19215	0.646514	0.696136	0.583934	3214.57	17.6208	3222.18	11.5986	3227.59	15.2681	3227.59	15.2681	99.5967
FI-2	part 1	20	199.287	53771	1.44043	3.85932	0.678037	23.1252	0.926426	0.651869	0.629774	0.679788	3235.5	16.021	3232.23	9.01709	3230.87	10.7197	3230.87	10.7197	100.144
FI-2	part 1	21	190.5	60865.8	1.28834	3.86084	0.690977	22.7191	0.968481	0.64062	0.677091	0.699127	3191.45	17.0435	3214.99	9.41947	3230.38	10.9255	3230.38	10.9255	98.7949
FI-2	part 1	22	200.893	58641.8	1.40221	3.86977	0.768463	22.6642	1.05585	0.640566	0.723612	0.685335	3191.24	18.2136	3212.63	10.2682	3226.69	12.1352	3226.69	12.1352	98.9013
FI-2	part 1	23	197.996	53118.9	1.57707	3.87324	0.675751	23.1705	0.93187	0.655507	0.640068	0.686864	3249.68	16.3377	3234.13	9.07082	3225.17	10.6904	3225.17	10.6904	100.76
FI-2	part 1	24	156.517	45499.1	1.65936	3.86655	0.678158	22.8409	0.925466	0.644202	0.627062	0.677564	3205.51	15.8379	3220.19	9.00311	3230.02	10.7394	3230.02	10.7394	99.2413
FI-2	part 1	25	141.28	34151.3	1.85316	3.86879	0.845112	23.2615	1.54937	0.656635	1.29757	0.837488	3254.08	33.1552	3237.95	15.0847	3228.64	13.3604	3228.64	13.3604	100.788
FI-2	part 1	26	226.825	68976	1.24445	3.87077	0.717299	23.3022	1.11934	0.657726	0.85896	0.767379	3258.32	21.9697	3239.65	10.8984	3228.78	11.3254	3228.78	11.3254	100.915
FI-2	part 1	29	235.487	67559.5	1.27381	3.86077	0.677621	22.9104	0.921911	0.645091	0.622478	0.675204	3209	15.7353	3223.14	8.96966	3232.63	10.7274	3232.63	10.7274	99.269
FI-2	part 1	30	152.417	37258.8	1.62599	3.86224	0.886036	23.1908	1.26773	0.653555	0.90354	0.712722	3242.08	23.0214	3234.98	12.3408	3231.26	14.0294	3231.26	14.0294	100.335
FI-2	part 1	34	268.114	65909.8	1.11703	3.88201	0.687391	22.9185	1.00503	0.648868	0.731992	0.728332	3223.78	18.5693	3223.49	9.77852	3223.98	10.8663	3223.98	10.8663	99.9938
FI-2	part 1	36	281.662	75962.3	1.36714	3.87101	0.713934	22.6118	1.01888	0.638317	0.724927	0.711497	3182.4	18.2076	3210.38	9.90766	3228.59	11.2978	3228.59	11.2978	98.5694
FI-2	part 1	38	219.544	61708.6	1.64691	3.87744	0.627609	22.8404	0.898286	0.645923	0.640625	0.713164	3212.26	16.2067	3220.17	8.73867	3225.77	9.93891	3225.77	9.93891	99.581
FI-2	part 1	39	184.663	51676.7	1.64158	3.86968	0.697418	23.3095	0.958698	0.657949	0.656321	0.684596	3259.18	16.7902	3239.95	9.33428	3228.74	11.0272	3228.74	11.0272	100.943
FI-2	part 1	40	299.828	83775.8	1.39501	3.8735	0.715111	22.6141	0.999595	0.638762	0.698146	0.698429	3184.15	17.5424	3210.48	9.7202	3227.65	11.2898	3227.65	11.2898	98.6522
FI-2	part 1	43	247.745	15443.8	1.19696	3.85371	0.649541	23.7809	1.02576	0.6697	0.761951	0.742813	3304.72	19.701	3259.45	9.99546	3232.4	10.8335	3232.4	10.8335	102.237
FI-2	part 1	45	230.678	51371.5	1.74168	3.8677	0.826479	22.9736	1.21148	0.647404	0.884205	0.729854	3218.06	22.4	3225.83	11.7886	3231.34	13.0657	3231.34	13.0657	99.589
FI-2	part 1	46	205.286	53373.8	1.73531	3.87503	0.72418	22.8223	1.0415	0.645077	0.746045	0.716315	3208.94	18.8586	3219.4	10.1317	3226.59	11.4699	3226.59	11.4699	99.453
FI-2	part 1	49	151.723	37733.1	1.43055	3.88256	0.940047	23.5383	1.33998	0.667447	0.954196	0.712097	3296.01	24.622	3249.46	13.0522	3221.54	14.8487	3221.54	14.8487	102.312
FI-2	part 1	50	190.58	40273.6	1.17874	3.88741	0.760484	22.8482	1.09722	0.648652	0.788896	0.718998	3222.94	20.0088	3220.5	10.6742	3219.65	12.0369	3219.65	12.0369	100.102
FI-2	part 1	53	200.877	57667	1.79505	3.868	0.937506	23.3691	1.27795	0.663456	0.865839	0.677522	3280.56	22.2617	3242.44	12.4442	3219.62	14.8377	3219.62	14.8377	101.893
FI-2	part 1	54	179.693	51937.1	1.29866	3.86824	0.706796	23.5031	0.963441	0.667352	0.650347	0.675026	3295.64	16.78	3248.01	9.38364	3219.4	11.2199	3219.4	11.2199	102.368
FI-2	part 1	55	208.844	37554.5	1.28688	3.87082	0.756921	21.5147	1.39436	0.6115	1.16848	0.838001	3076.01	28.583	3162.08	13.5301	3217.83	12.0115	3217.83	12.0115	95.5925
FI-2	part 1	57	170.841	40027.9	1.68369	3.86224	0.699353	23.385	0.956388	0.665329	0.648534	0.678108	3287.82	16.7028	3243.1	9.31303	3216.24	11.0976	3216.24	11.0976	102.225
FI-2	part 1	58	166.744	44578.4	2.27204	3.87755	0.760741	23.4762	1.13361	0.66671	0.837235	0.738557	3293.16	21.5896	3246.89	11.0406	3219.11	12.0641	3219.11	12.0641	102.3
FI-2	part 1	59	228.117	62498.6	1.51354	3.86315	0.593445	23.4746	0.818118	0.664012	0.562036	0.686987	3282.72	14.4578	3246.82	7.96778	3225.4	9.38369	3225.4	9.38369	101.777
FI-2	part 1	60	203.488	57062.3	1.1777	3.8669	0.766113	24.1135	1.04217	0.682784	0.706319	0.677739	3355.03	18.4746	3272.99	10.161	3223.79	12.0921	3223.79	12.0921	104.071
FI-2	part 1	62	172.937	48432.1	1.76905	3.86163	0.697	23.506	0.993844	0.668546	0.707631	0.712014	3300.26	18.2776	3248.13	9.67983	3216.77	11.0171	3216.77	11.0171	102.595
FI-2	part 1	63	275.395	64344.3	1.46899	3.86031	0.627855	23.0324	0.845913	0.654721	0.56467	0.667528	3246.62	14.4027	3228.31	8.23203	3217.63	9.94263	3217.63	9.94263	100.901
FI-2	part 1	64	237.62	71949.8	1.43697	3.86227	0.62235	23.1602	0.811765	0.658643	0.519004	0.639352	3261.89	13.2858	3233.7	7.90152	3216.93	9.85349	3216.93	9.85349	101.397
FI-2	part 1	65	194.813	50668.6	1.59353	3.87521	0.754897	23.1289	1.00035	0.660115	0.654522	0.654294	3267.6	16.7774	3232.38	9.73671	3211.28	11.9486	3211.28	11.9486	101.754
FI-2	part 1	66	243.159	60174.2	1.62392	3.87645	0.763908	23.8181	1.06702	0.679911	0.744471	0.697711	3344.02	19.4237	3260.98	10.3981	3210.99	12.0735	3210.99	12.0735	104.143
FI-2	part 1	68	285.838	19794.7	0.876355	3.89378	0.72384	21.4753	1.4954	0.61666	1.29545	0.866289	3096.61	31.8544	3160.3	14.5094	3201.67	11.8122	3201.67	11.8122	96.7188
FI-2	part 1	69	189.279	38698.2	1.75165	3.87118	0.866357	23.7835	1.19452	0.67366	0.820605	0.686977	3319.98	21.2925	3259.56	11.64	3223.27	13.6984	3223.27	13.6984	103.001
FI-2	part 1	71	191.122	53936.4	1.4726	3.86362	0.80344	23.4886	1.08388	0.663814	0.726578	0.670347	3281.95	18.6872	3247.41	10.5565	3226.82	12.6888	3226.82	12.6888	101.709
FI-2	part 1	76	252.613	47563.6	1.39619	3.86138	0.822123	23.6952	1.12632	0.668517	0.768232	0.68207	3300.15	19.8424	3255.94	10.9738	3229.5	12.9966	3229.5	12.9966	102.188
FI-2	part 1	77	281.196	75423	1.58496	3.86749	0.780467	23.6417	1.05424	0.667855	0.708449	0.672	3297.59	18.2874	3253.73	10.2705	3227.49	12.3209	3227.49	12.3209	102.172
FI-2	part 1	79	143.829	27240.5	1.5013	3.93799	1.01674	22.1709	1.79146	0.638363	1.47242	0.821908	3182.58	36.9838	3191.24	17.4069	3197.37	16.1418	3197.37	16.1418	99.5373
FI-2	part 1	80	226.905	27370.1	0.824787	3.95675	0.819409	21.6215	1.31545	0.625517	1.02762	0.781191	3131.84	25.4918	3166.88	12.7671	3189.84	12.9982	3189.84	12.9982	98.1816
FI-2	part 1	81	164.794	44311.8	1.90285	3.86892	0.861514	23.6984	1.22032	0.669955	0.863917	0.707942	3305.7	22.3426	3256.07	11.8898	3226.32	13.5981	3226.32	13.5981	102.46
FI-2	part 1	82	164.043	40971.2	1.89801	3.8604	0.971063	23.93	1.34594	0.67506	0.928913	0.690158	3325.38	24.1328	3265.54	13.119	3229.69	15.3686	3229.69	15.3686	102.963
FI-2	part 1	83	194.4	4473.93	1.3121	3.81104	0.750014	23.9091	1.05767	0.672743	0.621037	0.587177	3316.45	16.1011	3264.69	10.3086	3233.73	13.5043	3233.73	13.5043	102.558
FI-2	part 1	84	197.468	54509	1.87307	3.8708	0.653904	23.2019	0.971857	0.657714	0.717685	0.738467	3258.27	18.3561	3235.45	9.46061	3222.01	10.3413	3222.01	10.3413	101.126
FI-2	part 1	85	182.318	52276.1	1.58332	3.86736	0.68926	22.759	0.954574	0.644606	0.659666	0.691058	3207.09	16.6677	3216.69	9.28489	3223.36	10.8873	3223.36	10.8873	99.4955
FI-2	part 1	86	219.412	48327.8	1.49018	3.86929	0.687992	23.3543	1.00707	0.661838	0.731528	0.726393	3274.29	18.7808	3241.82	9.80605	3222.47	10.9223	3222.47	10.9223	101.608
FI-2	part 1	87	162.351	39452.3	1.78597	3.88067	0.794329	24.1435	1.42784	0.686339	1.18394	0.829185	3368.64	31.0632	3274.21	13.9223	3217.55	12.6003	3217.55	12.6003	104.696
FI-2	part 1	88	170.806	50628.1	1.62115	3.8493	1.15719	23.939	1.64347	0.674868	1.16601	0.709478	3324.64	30.2873	3265.91	16.0197	3230.73	18.2687	3230.73	18.2687	102.907
FI-2	part 1	89	117.686	29842.3	2.02643	3.86906	0.853496	23.3123	1.24791	0.659688	0.902139	0.722921	3265.94	23.1156	3240.07	12.1505	3224.77	13.6051	3224.77	13.6051	101.277
FI-2	part 1	90	179.126	24007.4	0.903464	3.89063	0.739594	22.7842	1.13754	0.648812	0.859515	0.75559	3223.56	21.8032	3217.77	11.0652	3214.84	11.7659	3214.84	11.7659	100.271
FI-2	part 1	91	172.855	43528.9	1.7321	3.88128	0.657671	24.0221	1.00863	0.680815	0.760583	0.754073	3347.49	19.8598	3269.29	9.8325	3222.35	10.4539	3222.35	10.4539	103.883
FI-2	part 1	92	190.588	43927.3	1.81189	3.86514	0.774784	23.8509	1.11285	0.672308	0.794269	0.713722	3314.78	20.5844	3262.32	10.8454	3230.91	12.2979	3230.91	12.2979	102.596
FI-2	part 1	93	194.514	30721.9	1.53001	3.93298	0.803878	22.4666	1.26327	0.644401	0.970812	0.76849	3206.29	24.5247	3204.12	12.281	3203.44	12.775	3203.44	12.775	100.089
FI-2	part 1	94	204.95	53540.4	1.0714	3.86754	0.730041	23.1724	0.999334	0.65355	0.680784	0.681238	3242.06	17.3456	3234.21	9.72759	3230.02	11.543	3230.02	11.543	100.373
FI-2	part 1	95	216.907	60578.8	1.73054	3.8677	0.663488	23.8574	0.963081	0.672833	0.69656	0.723262	3316.8	18.0606	3262.58	9.38582	3230.11	10.4937	3230.11	10.4937	102.684
FI-2	part 1	96	238.927	70694.7	1.38012	3.8718	0.726964	23.3717	1.01705	0.659774	0.711149	0.699227	3266.28	18.2233	3242.55	9.90354	3228.58	11.4735	3228.58	11.4735	101.168
FI-2	part 1	97	163.44	48686.5	1.84207	3.85875	0.705332	23.4964	0.944973	0.661229	0.627011	0.663523	3271.93	16.0885	3247.73	9.20366	3233.5	11.1518	3233.5	11.1518	101.188
FI-2	part 1	98	139.162	39452.3	1.31609	3.86514	0.77417	23.7177	1.02521	0.668688	0.671169	0.654665	3300.81	17.338	3256.86	9.98899	3230.59	12.2272	3230.59	12.2272	102.173
FI-2	part 1	99	220.585	58185.7	1.41169	3.85566	0.993697	23.3143	1.35336	0.654614	0.917215	0.67773	3246.2	23.3927	3240.15	13.1774	3237.08	15.6928	3237.08	15.6928	100.282
FI-2	part 1	100	166.231	41966.7	1.72111	3.85266	0.618461	23.4604	0.888956	0.658378	0.635352	0.714717	3260.85	16.2602	3246.24	8.6575	3237.89	9.80374	3237.89	9.80374	100.709
FI-2	part 2	1	121.055	75116.2	1.79427	3.85561	0.747208	22.9982	1.14694	0.646553	0.869046	0.757711	3214.72	21.9984	3226.87	11.161	3235.1	11.8048	3235.1	11.8048	99.3701
FI-2	part 2	2	182.878	163980	1.54273	3.86242	0.778598	23.0908	1.01536	0.65011	0.651595	0.641741	3228.63	16.549	3230.78	9.88211	3232.78	12.2837	3232.78	12.2837	99.8718
FI-2	part 2	4	163.636	127211	1.34425	3.89404	0.767728	23.2304	0.96885	0.658164	0.590626	0.609616	3260.02	15.1126	3236.64	9.43181	3222.86	12.1197	3222.86	12.1197	101.153
FI-2	part 2	6	232.692	164870	1.67666	3.87304	0.669954	23.5346	0.87994	0.663138	0.570178	0.647973	3279.33	14.6556	3249.31	8.5708	3231.51	10.5735	3231.51	10.5735	101.48
FI-2	part 2	7	189.373	147869	1.68909	3.87929	0.833494	23.9542	1.18782	0.676067	0.846227	0.712418	3329.25	22.0042	3266.53	11.5781	3228.93	13.1534	3228.93	13.1534	103.107
FI-2	part 2	8	141.085	115790	0.963098	3.86114	0.751055	24.2077	0.998738	0.678011	0.657843	0.658674	3336.72	17.135	3276.79	9.73902	3241	11.8464	3241	11.8464	102.954
FI-2	part 2	10	201.173	140343	1.43459	3.87116	0.720642	23.8937	1.08366	0.670914	0.808852	0.74641	3309.4	20.9364	3264.06	10.5616	3237.01	11.3721	3237.01	11.3721	102.236
FI-2	part 2	11	151.912	126836	1.94131	3.84576	0.777303	23.5395	1.12319	0.658851	0.810613	0.721706	3262.69	20.7545	3249.51	10.9404	3242.07	12.2551	3242.07	12.2551	100.636
FI-2	part 2	12	283.416	213744	1.37874	3.87087	0.793861	23.0584	1.09513	0.649658	0.754354	0.688825	3226.87	19.1507	3229.41	10.658	3231.66	12.5246	3231.66	12.5246	99.8517
FI-2	part 2	13	159.888	131462	1.54677	3.86074	0.722223	23.2691	1.01806	0.654611	0.717393	0.704666	3246.19	18.2963	3238.26	9.91159	3234.03	11.3937	3234.03	11.3937	100.376
FI-2	part 2	14	212.687	136928	2.1307	3.8938	0.861207	23.0559	2.22602	0.654162	2.05257	0.922083	3244.44	52.3279	3229.31	21.6663	3220.59	13.5973	3220.59	13.5973	100.741
FI-2	part 2	15	152.42	113494	1.86348	3.87034	0.753265	23.0886	1.12071	0.651181	0.829282	0.739964	3232.82	21.0828	3230.69	10.9075	3230.04	11.8942	3230.04	11.8942	100.086
FI-2	part 2	16	289.242	198657	1.59395	3.87713	0.775568	22.8195	1.08053	0.644621	0.752098	0.696048	3207.16	19.0035	3219.28	10.5113	3227.51	12.2435	3227.51	12.2435	99.3693
FI-2	part 2	17	207.361	135227	1.37025	3.8888	0.898643	23.5017	1.2534	0.665954	0.873672	0.697043	3290.24	22.5138	3247.95	12.2079	3222.62	14.1836	3222.62	14.1836	102.098
FI-2	part 2	18	247.645	134288	1.14675	3.86885	0.75145	23.6111	1.03393	0.664576	0.710027	0.686726	3284.9	18.2741	3252.47	10.0721	3233.22	11.8555	3233.22	11.8555	101.599
FI-2	part 2	19	161.656	46295.5	1.17611	3.85478	0.987041	23.9353	1.43651	0.670828	1.04175	0.725192	3309.07	26.9627	3265.76	14.002	3239.95	15.5939	3239.95	15.5939	102.133
FI-2	part 2	20	110.952	90563.6	1.67948	3.85984	0.899056	24.1863	1.2517	0.678466	0.870688	0.695603	3338.47	22.6881	3275.93	12.2056	3238.55	14.1789	3238.55	14.1789	103.085
FI-2	part 2	21	129.792	96164.3	2.00412	3.87781	0.752363	23.9862	1.01963	0.67597	0.68696	0.673738	3328.88	17.8613	3267.83	9.93906	3231.26	11.8873	3231.26	11.8873	103.021
FI-2	part 2	22	279.163	210588	0.825893	3.879	0.920248	24.2873	1.41259	0.684508	1.07167	0.75866	3361.63	28.073	3279.99	13.7768	3231.14	14.5192	3231.14	14.5192	104.039
FI-2	part 2	23	196.304	142587	2.16093	3.87753	0.704785	23.5271	1.36942	0.662893	1.17409	0.857362	3278.38	30.1718	3249	13.3387	3231.59	11.12	3231.59	11.12	101.448
FI-2	part 2	24	173.521	75972.9	1.47235	3.88254	0.73921	21.9774	1.44433	0.620334	1.24011	0.858605	3111.25	30.6057	3182.73	14.0281	3228.78	11.6837	3228.78	11.6837	96.3598
FI-2	part 2	27	146.877	103752	1.66856	3.88652	0.780204	22.7449	1.04351	0.642558	0.692464	0.663591	3199.07	17.4626	3216.09	10.1497	3227.4	12.3199	3227.4	12.3199	99.1219
FI-2	part 2	28	174.453	132954	1.78324	3.85402	0.922117	22.8579	1.26077	0.640293	0.859703	0.681889	3190.17	21.6334	3220.91	12.2656	3240.79	14.538	3240.79	14.538	98.438
FI-2	part 2	29	196.981	127353	1.43166	3.85981	0.760596	23.3634	0.997806	0.655843	0.645723	0.647143	3250.99	16.4872	3242.2	9.716	3237.44	11.9952	3237.44	11.9952	100.418
FI-2	part 2	30	148.794	106164	1.61737	3.85489	0.812832	23.0537	1.08588	0.646367	0.719849	0.662918	3213.99	18.2185	3229.21	10.5678	3239.35	12.8178	3239.35	12.8178	99.2172
FI-2	part 2	31	146.92	102427	1.52778	3.859	0.866724	23.6107	1.21312	0.662697	0.848751	0.699643	3277.62	21.8073	3252.46	11.8179	3237.66	13.6676	3237.66	13.6676	101.234
FI-2	part 2	32	166.369	126907	1.68327	3.85408	0.637347	23.0462	0.890337	0.645978	0.621218	0.697733	3212.47	15.7165	3228.89	8.66458	3239.78	10.0553	3239.78	10.0553	99.157
FI-2	part 2	33	160.264	122379	1.52245	3.86733	0.850402	22.8242	1.14428	0.641965	0.765297	0.6688	3196.73	19.2884	3219.48	11.1316	3234.35	13.418	3234.35	13.418	98.837
FI-2	part 2	34	147.978	98864.6	1.79033	3.86772	0.732665	23.1765	1.03203	0.655289	0.726639	0.704087	3248.84	18.5437	3234.38	10.0459	3226.11	11.5669	3226.11	11.5669	100.705
FI-2	part 2	35	162.191	127004	1.59043	3.88107	0.697345	23.0748	1.09572	0.654608	0.844864	0.77106	3246.18	21.5473	3230.1	10.664	3220.81	11.0117	3220.81	11.0117	100.788
FI-2	part 2	36	161	116500	1.7746	3.87612	0.928928	23.0948	1.30471	0.654358	0.915616	0.701777	3245.21	23.3464	3230.95	12.6987	3222.78	14.6689	3222.78	14.6689	100.696
FI-2	part 2	38	150.394	99872.5	1.86486	3.87976	0.732779	22.6252	0.972864	0.642488	0.639742	0.657586	3198.79	16.1319	3210.96	9.46045	3219.24	11.5692	3219.24	11.5692	99.3647
FI-2	part 2	39	202.036	130851	1.51015	3.8653	0.950322	22.9245	1.3344	0.648496	0.936294	0.70166	3222.33	23.7439	3223.74	12.9836	3225.3	15.0023	3225.3	15.0023	99.908
FI-2	part 2	40	161.779	127537	1.76254	3.87357	0.783205	22.7794	1.11494	0.645777	0.793404	0.711612	3211.68	20.069	3217.56	10.8452	3221.9	12.3625	3221.9	12.3625	99.6828
FI-2	part 2	41	131.755	112692	2.02761	3.84494	0.717904	22.8853	0.960344	0.64401	0.63742	0.663742	3204.76	16.0966	3222.08	9.34318	3233.55	11.3302	3233.55	11.3302	99.1096
FI-2	part 2	42	103.903	81068.1	1.87419	3.8859	1.08209	23.582	1.66571	0.670779	1.26592	0.759988	3308.88	32.7634	3251.27	16.2267	3216.6	17.0947	3216.6	17.0947	102.869
FI-2	part 2	43	86.4767	7250.32	1.59831	3.7486	1.20208	23.6667	1.75969	0.654766	1.18751	0.674841	3246.8	30.2906	3254.76	17.1449	3260.35	20.4352	3260.35	20.4352	99.5843
FI-2	part 2	44	228.005	130948	1.74077	3.89454	0.716725	21.9845	1.75589	0.628709	1.60294	0.912892	3144.48	39.8884	3183.04	17.0549	3208.12	11.3232	3208.12	11.3232	98.0161
FI-2	part 2	45	199.613	152457	1.75706	3.86657	0.671565	22.9986	0.905242	0.65241	0.606728	0.670238	3237.61	15.4424	3226.88	8.80889	3220.89	10.6029	3220.89	10.6029	100.519
FI-2	part 2	46	136.739	106651	1.75426	3.87135	0.745074	23.306	1.05676	0.662025	0.749299	0.70905	3275.01	19.2403	3239.81	10.2891	3218.76	11.7631	3218.76	11.7631	101.748
FI-2	part 2	47	166.01	129072	1.51716	3.87777	1.08434	22.6779	1.49915	0.64521	1.03487	0.690302	3209.46	26.1628	3213.22	14.5802	3216.24	17.1277	3216.24	17.1277	99.7892
FI-2	part 2	48	130.329	95168	1.92123	3.85823	0.783069	23.1692	1.13648	0.655936	0.823465	0.724574	3251.36	21.0273	3234.07	11.0626	3224.05	12.3594	3224.05	12.3594	100.847
FI-2	part 2	49	202.153	148671	1.54479	3.88262	0.735939	22.9974	1.0782	0.655632	0.787568	0.730445	3250.17	20.105	3226.83	10.4921	3213.04	11.6291	3213.04	11.6291	101.156
FI-2	part 2	50	130.607	100669	1.94187	3.87747	0.792061	23.1144	1.07238	0.658481	0.72286	0.674068	3261.25	18.5015	3231.77	10.4376	3214.21	12.5089	3214.21	12.5089	101.464
FI-2	part 2	51	185.431	126470	1.35931	3.86242	0.83754	22.6055	1.12229	0.641432	0.746967	0.665575	3194.64	18.8169	3210.12	10.9132	3220.47	13.2208	3220.47	13.2208	99.1981
FI-2	part 2	52	234.671	168858	1.33257	3.86401	0.609729	22.7464	0.843467	0.645349	0.582697	0.690836	3210.01	14.7333	3216.16	8.20394	3220.67	9.62432	3220.67	9.62432	99.669
FI-2	part 2	53	274.395	200214	1.2564	3.868	0.70532	22.995	1.08678	0.65305	0.826618	0.760613	3240.11	21.0516	3226.73	10.5755	3219.1	11.1368	3219.1	11.1368	100.653
FI-2	part 2	55	271.711	178062	1.42688	3.86731	0.648556	23.0768	0.910839	0.654746	0.639393	0.701982	3246.72	16.309	3230.19	8.86461	3220.61	10.2379	3220.61	10.2379	100.811
FI-2	part 2	56	297.65	204428	1.20057	3.8606	0.703985	23.4947	0.961636	0.665427	0.655033	0.681166	3288.2	16.8716	3247.66	9.36592	3223.4	11.1095	3223.4	11.1095	102.01
FI-2	part 2	57	143.074	97914.9	1.53201	3.8559	0.768778	22.8583	1.07311	0.64613	0.748491	0.697499	3213.07	18.9392	3220.93	10.4398	3226.5	12.1366	3226.5	12.1366	99.5836
FI-2	part 2	58	197.626	139509	1.5913	3.85945	0.853007	22.7261	1.27217	0.642904	0.943716	0.741817	3200.42	23.8065	3215.29	12.3735	3225.24	13.4609	3225.24	13.4609	99.2304
FI-2	part 2	59	236.658	163962	1.41414	3.86442	0.71668	22.5249	0.982171	0.637854	0.671503	0.683693	3180.58	16.8583	3206.64	9.54916	3223.66	11.31	3223.66	11.31	98.6636
FI-2	part 2	60	162.703	121615	1.64671	3.85533	0.788685	22.41	1.05279	0.633162	0.697067	0.662116	3162.08	17.4212	3201.67	10.2335	3227.24	12.4512	3227.24	12.4512	97.981
FI-2	part 2	61	236.951	160992	1.02376	3.87652	0.722713	22.816	1.02554	0.647841	0.727483	0.709364	3219.77	18.4372	3219.13	9.97627	3219.41	11.4097	3219.41	11.4097	100.011
FI-2	part 2	62	250.01	171168	1.08836	3.94081	0.705874	22.1129	0.961402	0.638282	0.652384	0.678575	3182.26	16.385	3188.7	9.33982	3193.43	11.174	3193.43	11.174	99.6501
FI-2	part 2	63	154.079	115796	1.513	3.86504	0.874279	22.891	1.26753	0.647736	0.917522	0.723865	3219.35	23.2513	3222.32	12.3322	3224.84	13.7992	3224.84	13.7992	99.8298
FI-2	part 2	64	134.635	103280	4.53905	3.85622	0.68052	23.2443	0.969002	0.656257	0.689705	0.711768	3252.6	17.6169	3237.22	9.43352	3228.39	10.7407	3228.39	10.7407	100.75
FI-2	part 2	65	215.611	162953	0.861716	3.8907	0.716268	21.7521	1.21591	0.619534	0.982359	0.807923	3108.06	24.2251	3172.72	11.804	3214.55	11.314	3214.55	11.314	96.6874
FI-2	part 2	66	144.732	113534	1.52548	3.84672	0.847884	23.0663	1.17509	0.649604	0.813545	0.692326	3226.66	20.6524	3229.74	11.4364	3232.34	13.3763	3232.34	13.3763	99.8243
FI-2	part 2	67	146.4	120674	1.57224	3.83903	0.870709	22.8639	1.14023	0.642603	0.736001	0.645484	3199.24	18.5613	3221.17	11.093	3235.52	13.7348	3235.52	13.7348	98.8787
FI-2	part 2	68	175.332	111480	1.38112	3.8735	0.801729	22.9104	1.05823	0.650547	0.689814	0.651853	3230.34	17.5268	3223.14	10.2961	3219.34	12.6678	3219.34	12.6678	100.342
FI-2	part 2	69	125.745	110143	1.77051	3.86148	0.898425	23.0021	1.23701	0.651126	0.850159	0.687269	3232.6	21.6125	3227.03	12.0377	3224.24	14.1794	3224.24	14.1794	100.259
FI-2	part 2	70	129.666	89973.7	1.59814	3.87943	1.24192	23.2072	1.72723	0.66004	1.19983	0.694655	3267.31	30.7534	3235.67	16.8151	3216.79	19.6196	3216.79	19.6196	101.571
FI-2	part 2	71	191.195	125649	1.44464	3.8734	0.6398	22.9209	1.03971	0.650803	0.819323	0.788031	3231.34	20.8223	3223.59	10.116	3219.44	10.1028	3219.44	10.1028	100.37
FI-2	part 2	72	261.501	183188	1.16285	3.86987	0.708554	22.8944	0.96483	0.649391	0.654729	0.678595	3225.83	16.6174	3222.46	9.38699	3221.05	11.1847	3221.05	11.1847	100.148
FI-2	part 2	74	177.1	111120	1.63153	3.86604	0.770024	22.9703	1.24283	0.650092	0.975415	0.784837	3228.56	24.7729	3225.69	12.0935	3224.57	12.1525	3224.57	12.1525	100.124
FI-2	part 2	75	175.756	129263	1.37073	3.86609	1.09359	23.0038	1.48818	0.651014	1.00915	0.678109	3232.16	25.6517	3227.1	14.4822	3224.63	17.2601	3224.63	17.2601	100.234
FI-2	part 2	76	253.83	98468.3	1.42555	3.8856	0.678895	22.5587	1.00848	0.641703	0.745551	0.739281	3195.71	18.7861	3208.1	9.8056	3216.52	10.7214	3216.52	10.7214	99.3529
FI-2	part 2	77	225.457	177583	1.77623	3.86556	0.712072	23.7321	1.04374	0.671473	0.763096	0.731116	3311.56	19.7619	3257.45	10.1698	3224.99	11.2353	3224.99	11.2353	102.684
FI-2	part 2	78	113.777	82627.6	2.03162	3.8572	0.79083	23.2586	1.07893	0.656824	0.733314	0.679666	3254.81	18.7405	3237.82	10.5041	3227.99	12.4893	3227.99	12.4893	100.831
FI-2	part 2	79	180.039	121937	1.37263	3.86526	0.757133	23.8125	1.1457	0.675164	0.85956	0.750246	3325.78	22.3331	3260.75	11.1649	3221.67	11.9548	3221.67	11.9548	103.231
FI-2	part 2	80	166.633	109558	1.64999	3.88403	0.801844	22.8466	1.17165	0.650953	0.853583	0.728529	3231.93	21.696	3220.43	11.3984	3213.96	12.6744	3213.96	12.6744	100.559
FI-2	part 2	81	110.569	72851.5	1.85709	3.85945	0.888825	22.7104	1.21442	0.643096	0.825888	0.680066	3201.17	20.8379	3214.62	11.8115	3223.69	14.0504	3223.69	14.0504	99.3016
FI-2	part 2	82	111.146	78022	1.6134	3.85463	0.821125	23.4536	1.116	0.663285	0.754548	0.676118	3279.9	19.3972	3245.96	10.8687	3225.73	12.9734	3225.73	12.9734	101.679
FI-2	part 2	83	132.538	95274.2	1.78154	3.86397	0.775537	22.8466	1.06016	0.647623	0.722639	0.68163	3218.91	18.3107	3220.43	10.3137	3222.05	12.2422	3222.05	12.2422	99.9027
FI-2	part 2	84	134.361	97460	1.47567	3.87243	0.763944	22.7468	1.01951	0.646202	0.674855	0.661942	3213.35	17.0771	3216.17	9.9163	3218.6	12.0632	3218.6	12.0632	99.8367
FI-2	part 2	85	218.303	96988.2	1.43588	3.86801	0.711923	21.969	1.28821	0.623399	1.07294	0.832894	3123.43	26.5606	3182.36	12.5114	3220.4	11.2525	3220.4	11.2525	96.9889
FI-2	part 2	86	109.489	74581.2	1.61876	3.86934	0.879367	22.7853	1.16816	0.646863	0.768862	0.658182	3215.94	19.4681	3217.82	11.3631	3219.66	13.8826	3219.66	13.8826	99.8842
FI-2	part 2	87	167.407	127070	1.47388	3.88177	0.702231	22.7925	1.17003	0.648999	0.935346	0.799417	3224.29	23.731	3218.12	11.3815	3214.95	11.099	3214.95	11.099	100.29
FI-2	part 2	89	232.298	159436	1.104	3.85797	0.818855	22.9706	1.18015	0.649707	0.849752	0.720036	3227.06	21.5736	3225.7	11.4836	3225.52	12.9214	3225.52	12.9214	100.048
FI-2	part 2	90	132.493	100082	1.23603	3.87204	0.822676	23.1971	1.10131	0.65831	0.732033	0.664692	3260.59	18.7333	3235.25	10.7208	3220.25	12.9875	3220.25	12.9875	101.253
FI-2	part 2	92	215.69	160225	0.925845	3.86878	0.751191	22.7139	1.04277	0.642765	0.723027	0.69337	3199.88	18.2369	3214.76	10.142	3224.74	11.8559	3224.74	11.8559	99.2289
FI-2	part 2	93	206.362	160761	1.10152	3.86016	0.792127	23.3632	1.10516	0.658002	0.770462	0.697151	3259.39	19.7112	3242.19	10.7614	3232.25	12.4991	3232.25	12.4991	100.84
FI-2	part 2	94	188.355	127536	1.06993	3.86803	0.722744	22.9957	1.0318	0.649017	0.736013	0.713332	3224.36	18.6739	3226.76	10.0404	3228.93	11.4104	3228.93	11.4104	99.8587
FI-2	part 2	95	216.462	132145	0.980444	3.86483	0.699288	23.1476	0.969058	0.652755	0.670821	0.692241	3238.96	17.0792	3233.17	9.43244	3230.25	11.0341	3230.25	11.0341	100.27
FI-2	part 2	96	114.395	73603.2	1.41833	3.86748	0.83889	22.7284	1.16473	0.641531	0.80734	0.693158	3195.03	20.3397	3215.38	11.3285	3228.78	13.2475	3228.78	13.2475	98.9547
FI-2	part 2	97	127.597	86952.8	1.42592	3.86088	0.93298	22.5825	1.25734	0.636272	0.842705	0.670229	3174.35	21.1243	3209.12	12.226	3231.61	14.7215	3231.61	14.7215	98.228
FI-2	part 2	98	185.795	98939.4	1.11146	3.92096	0.752608	21.126	1.63872	0.604471	1.4554	0.888132	3047.83	35.3466	3144.39	15.8885	3207.3	11.8989	3207.3	11.8989	95.0277
FI-2	part 2	99	211.126	158027	1.03521	3.86388	0.787929	22.3195	1.10788	0.628844	0.778559	0.702747	3145.02	19.3765	3197.74	10.7672	3231.65	12.4346	3231.65	12.4346	97.3191
FI-2	part 2	100	229.912	177468	1.25224	3.86665	0.626676	22.643	0.899605	0.638397	0.645096	0.717088	3182.71	16.2037	3211.73	8.74831	3230.57	9.89262	3230.57	9.89262	98.5186
FI-4	part 1	1	126.608	66921.1	2.68764	3.34307	0.732337	29.9326	1.20006	0.73116	0.950497	0.792039	3537.74	25.8789	3484.6	11.7918	3454.87	11.3565	3454.87	11.3565	102.399
FI-4	part 1	5	100.281	41909.7	1.81938	3.87995	0.713745	22.7765	1.37515	0.647335	1.17371	0.853509	3217.78	29.7323	3217.44	13.3766	3217.9	11.3118	3217.9	11.3118	99.9964
FI-4	part 1	6	63.802	31900.1	1.68423	3.91049	1.05194	23.8007	1.43231	0.681972	0.96388	0.672956	3351.92	25.1936	3260.27	13.9579	3205.05	16.7439	3205.05	16.7439	104.582
FI-4	part 1	7	139.404	57681.8	1.66481	3.8672	0.731308	23.8695	1.10724	0.675979	0.831135	0.750639	3328.91	21.6101	3263.08	10.791	3223.54	11.5438	3223.54	11.5438	103.269
FI-4	part 1	8	71.589	26832.4	2.02997	3.86637	0.905743	23.3545	1.45728	0.662715	1.13974	0.782099	3277.69	29.2843	3241.83	14.1903	3220.4	14.3342	3220.4	14.3342	101.779
FI-4	part 1	9	87.9013	39851.2	0.947398	3.84044	0.823299	24.5319	1.21567	0.6911	0.893113	0.734668	3386.81	23.5287	3289.77	11.8608	3231.83	13.0111	3231.83	13.0111	104.795
FI-4	part 1	10	108.45	48202.7	1.82157	3.87544	0.775038	24.1214	1.27711	0.685619	1.01257	0.79286	3365.88	26.5503	3273.31	12.452	3217.76	12.2866	3217.76	12.2866	104.603
FI-4	part 1	11	95.2603	43087.2	2.0508	3.89261	0.786156	23.7429	1.14994	0.67796	0.835184	0.726283	3336.53	21.7533	3257.9	11.2049	3210.53	12.486	3210.53	12.486	103.924
FI-4	part 1	12	117.902	52950.5	1.44693	3.88808	0.71193	24.4327	1.15931	0.694321	0.91239	0.787009	3399.08	24.1027	3285.82	11.3091	3218.1	11.2906	3218.1	11.2906	105.624
FI-4	part 1	13	123.639	46414.8	1.3698	3.91282	1.07272	22.7083	1.69515	0.647777	1.31145	0.77365	3219.51	33.2354	3214.53	16.4877	3212.1	16.9657	3212.1	16.9657	100.231
FI-4	part 1	14	115.345	52709.3	2.35833	3.89186	0.761542	24.8731	1.23398	0.705634	0.969186	0.785415	3441.98	25.8477	3303.25	12.0459	3220.78	12.0551	3220.78	12.0551	106.868
FI-4	part 1	16	166.975	68445.9	2.16485	3.85938	0.72089	23.3993	1.15224	0.658174	0.898638	0.779906	3260.06	22.994	3243.7	11.2206	3234.27	11.375	3234.27	11.375	100.797
FI-4	part 1	17	75.1802	27517.9	1.6373	3.85764	0.806102	23.3923	1.21078	0.658258	0.902197	0.745134	3260.39	23.0869	3243.41	11.7906	3233.6	12.7371	3233.6	12.7371	100.829
FI-4	part 1	20	114.703	56812.6	2.24027	3.87344	0.684727	24.3569	1.15134	0.688194	0.923237	0.801882	3375.72	24.2617	3282.78	11.2299	3227.18	10.8564	3227.18	10.8564	104.603
FI-4	part 1	22	106.864	43238.6	1.35198	3.87684	0.722277	24.2828	1.2388	0.686856	1.00408	0.810525	3370.61	26.3558	3279.81	12.0816	3225.44	11.4476	3225.44	11.4476	104.501
FI-4	part 1	23	175.221	24490	0.903564	3.92216	0.851625	23.3475	1.46384	0.668624	1.18365	0.808594	3300.56	30.5751	3241.54	14.254	3205.91	13.6097	3205.91	13.6097	102.952
FI-4	part 1	27	127.456	59063.7	1.48336	3.88447	0.754418	24.7305	1.27742	0.700721	1.02971	0.806085	3423.38	27.3493	3297.64	12.4672	3222.74	11.9299	3222.74	11.9299	106.226
FI-4	part 1	28	103.889	45816.5	1.57455	3.89059	0.708066	24.5787	1.11166	0.6981	0.856454	0.770431	3413.44	22.6975	3291.63	10.8467	3218.93	11.1869	3218.93	11.1869	106.043
FI-4	part 1	31	179.538	36271.2	2.58681	3.39646	0.779236	28.6786	1.84043	0.711125	1.66495	0.904651	3462.7	44.6057	3442.58	18.0597	3431.57	12.1857	3431.57	12.1857	100.907
FI-4	part 1	34	132.52	7848.7	2.33294	3.84068	0.773236	25.7562	1.30139	0.723742	0.951134	0.730862	3510.05	25.7438	3337.33	12.7208	3235.85	14.0081	3235.85	14.0081	108.474
FI-4	part 1	35	102.255	41927.5	1.4681	3.87794	0.834088	24.5606	1.28449	0.694059	0.973895	0.758196	3398.08	25.7218	3290.91	12.5329	3226.93	13.2131	3226.93	13.2131	105.304
FI-4	part 1	36	188.462	85519.9	2.63124	3.94863	0.839634	22.6685	1.26827	0.651966	0.950204	0.749212	3235.88	24.1747	3212.82	12.3343	3199.14	13.2855	3199.14	13.2855	101.149
FI-4	part 1	38	157.67	71818.1	1.46531	3.86289	0.745124	24.4387	1.17721	0.689231	0.910511	0.77345	3379.68	23.9487	3286.06	11.4838	3230.1	11.7734	3230.1	11.7734	104.631
FI-4	part 1	40	143.704	7948.74	1.52536	3.89446	0.692961	24.3791	1.37719	0.696299	1.11397	0.808875	3406.6	29.4774	3283.67	13.4335	3210.14	12.7913	3210.14	12.7913	106.12
FI-4	part 1	41	123.881	56184.2	2.00685	3.89954	0.689843	24.1916	1.09187	0.688847	0.845338	0.774209	3378.22	22.2271	3276.14	10.647	3214.93	10.9118	3214.93	10.9118	105.079
FI-4	part 1	42	182.822	53949.3	1.21313	3.95615	0.735237	22.7708	1.0469	0.657839	0.744694	0.711333	3258.76	19.0491	3217.2	10.1832	3192.07	11.6443	3192.07	11.6443	102.089
FI-4	part 1	43	185.241	66146.4	0.98497	3.90234	1.06479	24.1068	1.61694	0.686852	1.21543	0.751687	3370.6	31.9035	3272.72	15.7654	3213.98	16.8421	3213.98	16.8421	104.873
FI-4	part 1	44	148.628	62664.4	3.03641	3.90435	0.753249	24.0104	1.23154	0.683664	0.97341	0.790401	3358.41	25.4802	3268.81	12.0054	3214.99	11.9125	3214.99	11.9125	104.461
FI-4	part 1	45	180.656	76881	2.36719	3.86668	0.759614	25.2287	1.20025	0.707766	0.928863	0.773892	3450.03	24.8161	3317.11	11.723	3238.42	11.9855	3238.42	11.9855	106.535
FI-4	part 1	47	134.011	19028.6	1.81052	3.90108	0.600938	24.5175	1.0549	0.695047	0.857195	0.812587	3401.84	22.6585	3289.2	10.2918	3221.92	9.70235	3221.92	9.70235	105.584
FI-4	part 1	48	189.367	92006.2	3.6309	3.85458	0.789119	25.1164	1.36556	0.702352	1.11439	0.816066	3429.56	29.639	3312.75	13.3355	3243.49	12.4392	3243.49	12.4392	105.737
FI-4	part 1	49	123.712	54232	1.99321	3.87269	0.772717	24.1406	1.31887	0.68186	1.06764	0.809512	3351.49	27.903	3274.09	12.8596	3227.69	12.2196	3227.69	12.2196	103.836
FI-4	part 1	52	164.818	76053.3	3.35892	3.34135	0.854728	31.0107	1.41302	0.753769	1.12511	0.796243	3621.38	31.1732	3519.39	13.9002	3462.5	13.2459	3462.5	13.2459	104.589
FI-4	part 1	54	91.6409	45848.3	2.62542	3.86325	0.795674	25.5826	1.29573	0.71906	1.02202	0.788756	3492.52	27.5583	3330.72	12.6624	3235.42	12.5618	3235.42	12.5618	107.946
FI-4	part 1	58	120.497	67580.4	9.98894	3.85548	0.813221	25.1549	1.4133	0.705253	1.15572	0.817746	3440.54	30.8128	3314.25	13.8026	3239.41	12.8253	3239.41	12.8253	106.209
FI-4	part 1	59	161.557	59068.6	1.70535	3.86966	0.749314	24.6215	1.43713	0.692902	1.22616	0.8532	3393.68	32.3526	3293.33	14.0238	3233.47	11.8238	3233.47	11.8238	104.954
FI-4	part 1	60	177.424	76848.4	2.5527	3.9378	0.773632	23.5688	1.5226	0.674861	1.31075	0.860863	3324.61	34.0468	3250.72	14.832	3206.14	12.2417	3206.14	12.2417	103.695
FI-4	part 1	61	155.79	73627.4	4.09805	3.34429	0.841154	32.5135	1.45432	0.790569	1.1863	0.81571	3755.25	33.765	3565.97	14.3272	3461.97	13.0359	3461.97	13.0359	108.472
FI-4	part 1	62	131.585	63480.5	2.30511	3.9177	0.761714	22.807	1.51019	0.649567	1.30378	0.863326	3226.51	33.0964	3218.74	14.6911	3214.58	12.0342	3214.58	12.0342	100.371
FI-4	part 1	64	94.3254	35834.3	1.51478	3.87868	0.686576	24.7432	1.30065	0.698255	1.10188	0.847174	3414.03	29.2055	3298.14	12.6942	3229.11	10.9044	3229.11	10.9044	105.727
FI-4	part 1	68	143.987	54431.2	2.59475	4.0686	0.769776	22.3779	1.37885	0.662216	1.14363	0.829406	3275.76	29.371	3200.28	13.4025	3153.98	12.2227	3153.98	12.2227	103.861
FI-4	part 1	69	122.746	56936.1	1.96526	3.87562	0.820567	24.8471	1.52517	0.701005	1.28543	0.842811	3424.46	34.1497	3302.23	14.8883	3229.52	12.9524	3229.52	12.9524	106.036
FI-4	part 1	70	131.516	28541.3	1.26764	3.85996	0.671218	26.0329	1.43879	0.731975	1.27005	0.88272	3540.77	34.6016	3347.77	14.0697	3234.86	10.6632	3234.86	10.6632	109.457
FI-4	part 1	72	58.9117	28810	2.90492	3.85598	1.09411	25.5103	1.73405	0.716542	1.34464	0.775433	3483.07	36.184	3327.95	16.9447	3236.49	17.2673	3236.49	17.2673	107.619
FI-4	part 1	73	194.001	77466.1	4.96863	3.88894	0.758959	24.7515	1.46272	0.700339	1.25021	0.854716	3421.94	33.1954	3298.47	14.2764	3224.94	11.9803	3224.94	11.9803	106.109
FI-4	part 1	76	120.874	52359.1	1.73917	3.87771	0.75023	25.4666	1.48058	0.718661	1.27513	0.861236	3491.03	34.3723	3326.28	14.4665	3229.13	11.873	3229.13	11.873	108.11
FI-4	part 1	78	143.672	49872.7	1.76399	3.9456	0.745207	23.8643	1.55692	0.686636	1.36663	0.877783	3369.77	35.8658	3262.87	15.174	3198.5	11.7969	3198.5	11.7969	105.355
FI-4	part 1	81	44.5777	19330.4	2.69364	3.88313	0.916772	24.5425	1.48005	0.695834	1.15662	0.78147	3404.83	30.5937	3290.19	14.4408	3221.74	14.5752	3221.74	14.5752	105.683
FI-4	part 1	84	196.515	73394.5	1.2304	4.02061	0.856264	21.88	2.66472	0.641359	2.5229	0.946776	3194.36	63.552	3178.42	25.8802	3169.05	13.5999	3169.05	13.5999	100.799
FI-4	part 1	85	149.043	32857.1	3.13971	4.06756	0.822719	21.7075	1.84515	0.644211	1.64979	0.894123	3205.55	41.6701	3170.73	17.9121	3149.46	13.1164	3149.46	13.1164	101.781
FI-4	part 1	87	91.2006	42820.5	3.12857	3.87457	0.914655	24.3053	1.54042	0.686813	1.23895	0.804291	3370.45	32.5197	3280.72	15.0242	3227.01	14.4417	3227.01	14.4417	104.445
FI-4	part 1	88	190.543	76304.6	4.30103	3.3478	0.711578	31.0305	1.27995	0.75758	1.06373	0.83107	3635.38	29.5574	3520.02	12.5913	3455.68	11.0343	3455.68	11.0343	105.2
FI-4	part 1	89	139.274	70069.2	3.05397	3.88951	0.730096	25.2472	1.20982	0.717066	0.96407	0.796869	3485.04	25.9538	3317.82	11.8168	3218.98	11.5376	3218.98	11.5376	108.266
FI-4	part 1	90	190.236	44753	1.72076	4.03641	0.805523	21.7157	1.98206	0.640431	1.8103	0.913344	3190.71	45.5607	3171.1	19.2418	3159.39	12.8012	3159.39	12.8012	100.991
FI-4	part 1	91	110.24	48224.7	3.59679	3.91398	0.75227	24.2698	1.88964	0.694612	1.73274	0.916969	3400.19	45.7859	3279.29	18.4298	3206.87	11.9112	3206.87	11.9112	106.028
FI-4	part 1	93	149.793	67877.7	1.80472	3.87174	0.676571	24.3846	1.08632	0.690227	0.849588	0.782077	3383.48	22.3653	3283.9	10.5962	3224.32	10.6815	3224.32	10.6815	104.936
FI-4	part 1	95	112.938	55550.9	2.28191	3.86047	0.778358	25.1093	1.43603	0.709295	1.2065	0.84016	3455.8	32.2744	3312.48	14.0237	3227.53	12.2909	3227.53	12.2909	107.073
FI-4	part 1	97	66.4982	23644.9	2.85228	3.89474	0.960706	24.0941	1.51466	0.687346	1.16594	0.769773	3372.49	30.6175	3272.21	14.7677	3212.01	15.2713	3212.01	15.2713	104.996
FI-4	part 1	98	196.553	36653.8	3.05183	3.96891	0.850047	22.6822	2.11187	0.659018	1.9326	0.915115	3263.34	49.4897	3213.41	20.5409	3183.06	13.4848	3183.06	13.4848	102.522
FI-4	part 1	100	48.535	22352.8	2.8653	3.9075	0.985528	24.6673	1.72249	0.706506	1.41077	0.81903	3445.27	37.6521	3295.14	16.81	3205.72	15.6178	3205.72	15.6178	107.473
FI-4	part 2	2	126.375	277684	1.3793	3.84896	0.785879	26.0786	1.11023	0.731738	0.784217	0.706354	3539.89	21.3614	3349.49	10.8572	3238.14	12.3917	3238.14	12.3917	109.319
FI-4	part 2	3	240.339	74200.6	0.681342	4.05445	0.86245	21.8156	1.46012	0.645864	1.17691	0.806037	3212.02	29.7723	3175.55	14.1769	3153.27	13.7142	3153.27	13.7142	101.863
FI-4	part 2	4	225.992	103747	0.944921	3.97836	0.789522	22.2864	1.66319	0.647306	1.46329	0.879811	3217.67	37.0672	3196.29	16.1639	3183.58	12.5192	3183.58	12.5192	101.071
FI-4	part 2	7	101.17	219010	0.848457	3.8724	0.693755	24.7321	0.970041	0.69905	0.677961	0.698899	3417.05	17.9815	3297.7	9.46713	3226.61	10.9499	3226.61	10.9499	105.902
FI-4	part 2	8	234.924	219523	1.92386	3.90943	0.710446	24.4161	1.18034	0.696034	0.942481	0.798485	3405.59	24.9338	3285.15	11.5139	3213.14	11.2214	3213.14	11.2214	105.99
FI-4	part 2	9	148.055	328364	2.03068	3.86421	0.696094	26.0776	1.09219	0.734752	0.841617	0.770576	3551.1	22.9794	3349.45	10.6808	3231.6	10.9819	3231.6	10.9819	109.887
FI-4	part 2	11	133.698	295423	1.49679	3.88915	0.86614	24.3667	1.20688	0.691391	0.840441	0.696374	3387.92	22.1466	3283.18	11.7719	3220.5	13.6717	3220.5	13.6717	105.199
FI-4	part 2	18	204.371	228245	1.7019	3.96927	0.697186	23.2537	1.04434	0.672107	0.777507	0.7445	3314	20.1464	3237.62	10.1671	3191.32	11.0341	3191.32	11.0341	103.844
FI-4	part 2	23	218.259	426115	5.73488	3.90203	0.905377	24.2572	1.43532	0.688499	1.11371	0.775933	3376.89	29.275	3278.79	13.9979	3220.01	14.2922	3220.01	14.2922	104.872
FI-4	part 2	27	113.486	211051	1.42701	3.84489	0.719439	24.4252	1.16352	0.683178	0.914297	0.785806	3356.54	23.9228	3285.52	11.3499	3243.13	11.3419	3243.13	11.3419	103.497
FI-4	part 2	28	245.233	466615	2.99423	3.87242	0.923421	24.7837	1.36311	0.697155	1.00267	0.735576	3409.85	26.5514	3299.73	13.3048	3234.18	14.5653	3234.18	14.5653	105.432
FI-4	part 2	30	87.9041	187402	1.83818	3.89451	0.814085	23.9898	1.13376	0.678472	0.789062	0.695972	3338.49	20.5612	3267.98	11.0517	3225.67	12.8449	3225.67	12.8449	103.498
FI-4	part 2	40	186.225	350992	1.80607	3.89099	0.622752	24.4588	0.918751	0.688858	0.675473	0.735208	3378.26	17.7608	3286.86	8.96264	3232.25	9.82434	3232.25	9.82434	104.517
FI-4	part 2	47	234.521	172724	1.2809	3.88683	0.735956	23.7286	1.20492	0.66732	0.95381	0.791593	3295.52	24.6092	3257.31	11.7404	3234.54	11.6127	3234.54	11.6127	101.885
FI-4	part 2	48	196.115	395534	3.33643	3.34359	0.739555	30.6326	1.08083	0.741112	0.788171	0.729226	3574.69	21.6271	3507.32	10.628	3469.73	11.4536	3469.73	11.4536	103.025
FI-4	part 2	50	244.895	444836	1.59801	3.9372	0.935819	24.2522	1.35822	0.690925	0.984364	0.724744	3386.14	25.9288	3278.58	13.2458	3214.14	14.7792	3214.14	14.7792	105.351
FI-4	part 2	51	231.586	654271	2.91723	3.3484	0.685505	31.4387	0.985126	0.759024	0.707492	0.718175	3640.67	19.68	3532.87	9.69474	3472.98	10.6196	3472.98	10.6196	104.829
FI-4	part 2	53	196.053	375024	2.41407	3.93591	0.741092	23.7338	1.18855	0.674619	0.929183	0.781778	3323.68	24.1304	3257.52	11.5809	3217.72	11.6999	3217.72	11.6999	103.293
FI-4	part 2	57	177.572	382691	1.95783	3.86445	0.738246	24.9974	1.11341	0.699005	0.833455	0.748563	3416.88	22.1049	3308.11	10.8709	3243.54	11.6356	3243.54	11.6356	105.344
FI-4	part 2	59	213.499	449997	1.71433	3.93668	0.66879	23.9146	1.11666	0.683034	0.894226	0.800802	3355.99	23.3947	3264.92	10.8837	3210.14	10.5637	3210.14	10.5637	104.544
FI-4	part 2	61	56.377	123973	9.18166	3.85457	0.891929	24.6664	1.23476	0.691267	0.853708	0.691394	3387.45	22.4938	3295.1	12.0497	3240.07	14.0642	3240.07	14.0642	104.548
FI-4	part 2	62	200.562	43342.4	1.59739	3.94657	0.916183	24.268	1.31771	0.696767	0.943289	0.715856	3408.38	24.9707	3279.22	12.851	3201.86	14.544	3201.86	14.544	106.45
FI-4	part 2	63	169.794	331971	1.29156	3.87632	0.723433	24.2598	1.07519	0.683569	0.795397	0.739773	3358.04	20.8188	3278.89	10.4855	3231.52	11.4133	3231.52	11.4133	103.915
FI-4	part 2	64	139.64	301596	2.47747	3.88936	0.852224	24.1697	1.28082	0.683776	0.956077	0.746458	3358.83	25.029	3275.26	12.4891	3225.17	13.4481	3225.17	13.4481	104.144
FI-4	part 2	67	197.739	503949	1.172	3.87553	0.678074	25.358	0.969948	0.714806	0.69351	0.714998	3476.55	18.6357	3322.1	9.47531	3230.87	10.6987	3230.87	10.6987	107.604
FI-4	part 2	70	179.992	354487	2.20821	3.9173	0.851704	23.204	1.20101	0.663337	0.846766	0.705045	3280.1	21.7689	3235.53	11.6915	3208.71	13.4557	3208.71	13.4557	102.225
FI-4	part 2	73	236.101	571476	2.30068	3.35927	0.706165	30.5843	1.04592	0.75047	0.771543	0.737668	3609.25	21.3235	3505.77	10.2842	3447.84	10.9579	3447.84	10.9579	104.681
FI-4	part 2	74	159.944	76849.4	1.32057	3.94529	0.715877	22.6042	1.39646	0.651731	1.1984	0.858172	3234.97	30.4826	3210.05	13.5795	3195.21	11.3417	3195.21	11.3417	101.244
FI-4	part 2	76	176.019	404847	1.80115	3.85741	0.665941	23.7438	0.991048	0.669044	0.733934	0.740564	3302.18	18.9655	3257.93	9.65654	3231.48	10.5065	3231.48	10.5065	102.188
FI-4	part 2	82	167.907	310529	1.93845	3.86625	0.725434	23.0786	1.11925	0.655301	0.852271	0.761465	3248.88	21.7501	3230.26	10.8931	3219.4	11.4518	3219.4	11.4518	100.916
FI-4	part 2	83	189.597	393901	1.64222	3.90021	0.783403	22.9907	1.02877	0.655997	0.666798	0.648154	3251.59	17.0277	3226.55	10.0108	3211.7	12.3734	3211.7	12.3734	101.242
FI-4	part 2	84	84.0546	181691	3.35562	3.85919	0.926611	24.62	1.25385	0.693625	0.844499	0.673525	3396.43	22.296	3293.27	12.235	3231.73	14.6214	3231.73	14.6214	105.096
FI-4	part 2	89	146.882	115120	1.6069	3.92817	0.732438	24.5195	1.04101	0.704805	0.739457	0.710323	3438.85	19.7073	3289.27	10.1564	3200.02	11.5881	3200.02	11.5881	107.463
FI-4	part 2	92	163.809	140827	1.59314	4.17202	0.993609	20.8244	1.70653	0.636683	1.38709	0.81281	3175.96	34.7844	3130.45	16.5353	3102.08	15.8428	3102.08	15.8428	102.382
FI-4	part 2	94	167.482	246572	1.97058	3.89336	0.657714	24.1098	0.930261	0.687137	0.65771	0.707017	3371.69	17.2682	3272.84	9.06977	3213.52	10.3884	3213.52	10.3884	104.922
FI-4	part 2	95	64.819	153901	3.08972	3.86792	0.930885	24.8209	1.1934	0.70285	0.746564	0.62558	3431.45	19.8643	3301.2	11.6488	3223.71	14.6926	3223.71	14.6926	106.444
FI-4	part 2	97	209.916	105242	1.87162	3.90391	0.665812	23.281	1.10286	0.665463	0.878817	0.796852	3288.34	22.6364	3238.76	10.7375	3208.88	10.5254	3208.88	10.5254	102.476
FI-4	part 2	98	183.066	362001	2.09656	3.90579	0.769813	23.6682	0.996647	0.676673	0.632981	0.63511	3331.58	16.468	3254.83	9.70985	3208.56	12.1617	3208.56	12.1617	103.834
FI-5	part 1	1	164.305	33609.4	2.44346	3.88832	0.678166	21.9049	1.01084	0.624788	0.74497	0.736983	3128.94	18.4669	3179.52	9.81607	3212.27	10.79	3212.27	10.79	97.4059
FI-5	part 1	2	215.105	25989.4	2.28812	3.93145	0.744106	20.613	1.14039	0.594701	0.861816	0.755721	3008.45	20.7183	3120.57	11.044	3194.2	11.8165	3194.2	11.8165	94.1849
FI-5	part 1	6	207.074	42239.7	4.49148	3.86325	0.695475	22.7512	1.12591	0.642997	0.8834	0.784609	3200.79	22.2869	3216.36	10.9514	3226.76	11.017	3226.76	11.017	99.1951
FI-5	part 1	8	241.233	42600	2.77049	3.95981	0.682196	20.7223	1.09114	0.599438	0.85078	0.779714	3027.57	20.5548	3125.69	10.5696	3190.01	10.8134	3190.01	10.8134	94.9079
FI-5	part 1	10	208.149	39742.6	2.80634	3.87321	0.78205	22.3854	1.14869	0.633401	0.840063	0.73132	3163.02	20.9999	3200.6	11.1653	3224.91	12.3616	3224.91	12.3616	98.081
FI-5	part 1	11	255.138	14834.7	1.60683	3.93291	0.681332	21.327	1.40733	0.610616	1.20791	0.858303	3072.47	29.5212	3153.57	13.6506	3206.28	11.4102	3206.28	11.4102	95.8266
FI-5	part 1	12	287.735	21281.9	1.22969	3.94219	0.639257	21.6678	1.0426	0.621149	0.802022	0.769252	3114.49	19.8097	3168.95	10.1197	3204.31	10.5265	3204.31	10.5265	97.1971
FI-5	part 1	13	227.954	40838.1	2.16968	3.88393	0.621183	22.7229	0.966362	0.645658	0.737823	0.763506	3211.22	18.661	3215.15	9.39892	3218.28	9.85093	3218.28	9.85093	99.7807
FI-5	part 1	14	185.52	48052.5	3.06253	3.90179	0.689513	22.8583	1.16811	0.652396	0.940546	0.805187	3237.56	23.9385	3220.93	11.3641	3211.27	10.9406	3211.27	10.9406	100.819
FI-5	part 1	18	191.592	12338.2	2.7663	3.85991	0.65267	21.6141	1.63288	0.611788	1.46944	0.899908	3077.16	35.9557	3166.55	15.8481	3224.36	11.2354	3224.36	11.2354	95.4346
FI-5	part 1	19	191.624	19580.9	1.96916	4.03065	0.764877	20.9289	1.07432	0.617564	0.749376	0.697533	3100.22	18.4433	3135.3	10.4114	3158.52	12.2107	3158.52	12.2107	98.1542
FI-5	part 1	20	157.302	32983.5	4.39659	3.89234	0.701839	23.8133	1.07852	0.677889	0.817018	0.757534	3336.25	21.2788	3260.78	10.5102	3215.37	11.1164	3215.37	11.1164	103.76
FI-5	part 1	21	188.086	35219.1	3.2374	3.87452	0.810371	22.9216	1.10429	0.649471	0.747626	0.677017	3226.14	18.9766	3223.62	10.7445	3222.72	12.8258	3222.72	12.8258	100.106
FI-5	part 1	22	204.277	38687	2.80986	3.88034	0.702383	23.0676	1.01202	0.654522	0.727033	0.718397	3245.85	18.5407	3229.8	9.84924	3220.52	11.1112	3220.52	11.1112	100.787
FI-5	part 1	23	211.017	35962.8	3.2234	3.3464	0.623632	28.1437	0.96106	0.688573	0.728909	0.758443	3377.17	19.1612	3424.11	9.42387	3452.36	9.71011	3452.36	9.71011	97.8221
FI-5	part 1	24	215.08	38205.9	1.66516	3.86088	0.820666	23.0023	1.24052	0.644859	0.929838	0.749556	3208.09	23.4998	3227.04	12.0718	3239.51	12.9463	3239.51	12.9463	99.0301
FI-5	part 1	25	248.342	36717.6	2.80653	3.85926	0.579541	23.0148	0.948959	0.644968	0.744316	0.78435	3208.52	18.813	3227.57	9.23459	3240.1	9.28027	3240.1	9.28027	99.0251
FI-5	part 1	26	178.043	37940.5	2.60782	3.85935	0.679148	23.6403	0.918554	0.662484	0.609979	0.664065	3276.79	15.6694	3253.68	8.94855	3240.14	10.8272	3240.14	10.8272	101.131
FI-5	part 1	28	222.753	44354	3.09001	3.88417	0.838594	22.6521	1.22075	0.638869	0.882823	0.723182	3184.57	22.1851	3212.12	11.8718	3230.04	13.303	3230.04	13.303	98.5923
FI-5	part 1	30	230.757	39503.2	2.78109	3.89483	0.812905	22.1146	1.20022	0.625499	0.880862	0.733917	3131.76	21.8508	3188.78	11.6601	3225.52	12.8627	3225.52	12.8627	97.0934
FI-5	part 1	31	125.774	15012.1	4.84209	3.83999	0.964053	22.3644	1.4311	0.624697	1.04724	0.731774	3128.58	25.9576	3199.69	13.9101	3245.25	15.3706	3245.25	15.3706	96.405
FI-5	part 1	33	268.448	58933.9	2.15003	3.88034	0.668044	22.7657	0.967215	0.642524	0.696692	0.720307	3198.93	17.5686	3216.98	9.40796	3228.93	10.5868	3228.93	10.5868	99.071
FI-5	part 1	34	286.332	11053.8	2.27918	3.89571	0.742746	20.0024	1.96219	0.568559	1.79587	0.915235	2901.9	41.9636	3091.47	18.9773	3217.71	12.4814	3217.71	12.4814	90.1853
FI-5	part 1	35	272.411	38308.3	2.45978	3.89842	0.674183	22.9744	1.02306	0.651681	0.767428	0.750128	3234.77	19.5194	3225.86	9.95502	3220.99	10.6773	3220.99	10.6773	100.428
FI-5	part 1	36	193.167	26327.7	2.60508	3.86886	0.745565	22.8924	1.10368	0.64474	0.809863	0.733784	3207.62	20.4653	3222.38	10.7379	3232.25	11.8287	3232.25	11.8287	99.238
FI-5	part 1	37	182.653	35867.1	1.75505	3.93134	0.745966	22.3412	1.18554	0.63913	0.920699	0.776605	3185.6	23.1427	3198.68	11.5226	3207.57	11.7998	3207.57	11.7998	99.3148
FI-5	part 1	38	241.964	49603.1	2.79422	3.87508	0.742591	22.1363	1.23419	0.623663	0.985317	0.798348	3124.48	24.3978	3189.73	11.9907	3231.7	11.7252	3231.7	11.7252	96.6821
FI-5	part 1	39	80.6695	20628.6	2.81147	3.30364	0.954847	28.1906	1.28942	0.677615	0.860354	0.667239	3335.2	22.4021	3425.75	12.6447	3479.79	14.8707	3479.79	14.8707	95.8448
FI-5	part 1	40	233.731	47327.7	2.08164	3.86689	0.771385	22.7899	1.06651	0.640739	0.736046	0.690143	3191.92	18.5296	3218.01	10.3744	3234.99	12.1728	3234.99	12.1728	98.6687
FI-5	part 1	41	255.385	32234.6	2.36172	3.91773	0.77777	21.5088	1.72424	0.612944	1.53792	0.891939	3081.78	37.6755	3161.81	16.7314	3213.69	12.3117	3213.69	12.3117	95.8955
FI-5	part 1	42	273.145	44428.1	2.80183	3.91494	0.691038	21.843	1.14938	0.621796	0.915856	0.796827	3117.06	22.6359	3176.77	11.1601	3215.38	10.9649	3215.38	10.9649	96.9423
FI-5	part 1	43	243.136	52234.8	2.92504	3.89338	0.682559	22.702	0.930147	0.642593	0.629648	0.676934	3199.2	15.879	3214.26	9.04633	3224.34	10.8023	3224.34	10.8023	99.2203
FI-5	part 1	44	265.616	32070	2.46869	3.93585	0.639063	21.0096	1.22214	0.601382	1.04007	0.851027	3035.4	25.1791	3139.03	11.8461	3206.66	10.1391	3206.66	10.1391	94.6592
FI-5	part 1	45	230.433	43700.5	2.95422	3.8596	0.982287	22.8277	1.40112	0.63979	0.997033	0.711598	3188.19	25.0772	3219.63	13.6305	3239.94	15.5198	3239.94	15.5198	98.4027
FI-5	part 1	46	268.803	35382	2.04835	3.95871	0.838549	20.9177	1.34302	0.60148	1.04615	0.778955	3035.8	25.3288	3134.79	13.0153	3199.48	13.3194	3199.48	13.3194	94.8841
FI-5	part 1	47	261.722	57512	3.59947	3.87003	0.985362	22.8665	1.44066	0.642466	1.05056	0.729217	3198.7	26.4907	3221.28	14.0162	3236.04	15.547	3236.04	15.547	98.8463
FI-5	part 1	49	283.605	56875.7	5.28744	3.91033	0.676438	22.5547	1.22331	0.640196	1.01909	0.833057	3189.79	25.6418	3207.92	11.8945	3219.96	10.6809	3219.96	10.6809	99.063
FI-5	part 1	50	203.601	44476.8	5.1796	3.8782	0.78736	22.6822	1.22417	0.638648	0.933768	0.762776	3183.7	23.4604	3213.41	11.9057	3232.68	12.4878	3232.68	12.4878	98.4849
FI-5	part 1	51	259.33	37833.1	2.62167	3.92238	0.717439	21.6403	1.15876	0.615542	0.904949	0.780964	3092.16	22.2271	3167.72	11.2466	3216.62	11.4262	3216.62	11.4262	96.1306
FI-5	part 1	52	266.665	54339.3	3.3044	3.90726	0.729837	22.9694	1.00074	0.650836	0.682287	0.681782	3231.47	17.3402	3225.65	9.73772	3222.7	11.553	3222.7	11.553	100.272
FI-5	part 1	53	265.442	58843.2	3.07608	3.87324	0.817562	23.1973	1.18474	0.65153	0.855159	0.721814	3234.18	21.7478	3235.26	11.533	3236.6	12.9303	3236.6	12.9303	99.9252
FI-5	part 1	54	115.042	31464.6	2.04946	3.1655	0.744491	31.4209	0.978047	0.722428	0.63172	0.6459	3505.14	17.0804	3532.32	9.6249	3548.43	11.5039	3548.43	11.5039	98.7801
FI-5	part 1	55	281.638	53130.5	2.28917	3.95471	0.777684	21.8716	1.20678	0.628146	0.919734	0.762142	3142.25	22.8744	3178.04	11.7182	3201.4	12.3543	3201.4	12.3543	98.1526
FI-5	part 1	56	188.479	47330.1	2.22402	3.87	0.73836	22.6566	1.07146	0.63592	0.775972	0.724219	3172.96	19.4449	3212.31	10.4199	3237.65	11.6504	3237.65	11.6504	98.002
FI-5	part 1	58	175.977	41036.4	2.65521	3.88488	0.735182	23.4104	1.05053	0.659338	0.7467	0.710782	3264.58	19.1266	3244.16	10.2303	3232.23	11.6574	3232.23	11.6574	101.001
FI-5	part 1	60	216.403	44511.8	3.26547	3.86732	0.912792	23.0117	1.24725	0.64513	0.848944	0.680651	3209.15	21.4608	3227.44	12.1375	3239.49	14.4063	3239.49	14.4063	99.0633
FI-5	part 1	67	210.891	45351.6	1.67889	3.86484	0.938109	23.1101	1.31021	0.647695	0.913758	0.697415	3219.19	23.155	3231.59	12.7525	3239.97	14.8036	3239.97	14.8036	99.3589
FI-5	part 1	69	244.97	35774.1	2.22568	3.94835	0.847452	22.0188	1.20488	0.630624	0.853498	0.708369	3152.05	21.2784	3184.56	11.7032	3205.78	13.4388	3205.78	13.4388	98.3241
FI-5	part 1	71	175.646	27778.5	2.85883	3.35247	0.797618	27.7207	1.28798	0.674121	1.01017	0.784302	3321.76	26.2219	3409.27	12.6232	3461.78	12.3813	3461.78	12.3813	95.9554
FI-5	part 1	72	227.578	50575.2	3.03598	3.88106	0.739896	22.7388	1.02647	0.639911	0.706977	0.688743	3188.67	17.7838	3215.83	9.98391	3233.49	11.7388	3233.49	11.7388	98.6137
FI-5	part 1	74	53.5505	10150.3	4.09883	3.85074	1.2185	23.7293	1.5878	0.664972	0.940152	0.592109	3286.43	24.2055	3257.34	15.4715	3240.15	20.1729	3240.15	20.1729	101.428
FI-5	part 1	75	217.158	38876.6	2.55475	3.90487	0.774696	23.4008	1.10693	0.663048	0.788611	0.712428	3278.98	20.2685	3243.76	10.7794	3222.73	12.2584	3222.73	12.2584	101.746
FI-5	part 1	77	243.077	52510.9	3.50911	3.86562	0.680554	23.438	0.989314	0.657245	0.716254	0.72399	3256.45	18.3116	3245.31	9.63456	3239.11	10.7597	3239.11	10.7597	100.535
FI-5	part 1	79	183.877	37690.4	2.75951	3.86808	0.693005	22.9834	1.01612	0.644775	0.741615	0.729847	3207.76	18.7413	3226.24	9.88767	3238.42	10.9526	3238.42	10.9526	99.0531
FI-5	part 1	80	174.67	40535.8	2.25144	3.87519	0.706161	22.8938	1.04549	0.643397	0.765178	0.731882	3202.36	19.3116	3222.44	10.1718	3235.64	11.2358	3235.64	11.2358	98.9714
FI-5	part 1	81	219.278	31340.7	3.55053	3.90395	0.729759	22.4097	1.09511	0.634664	0.814229	0.74351	3168.01	20.3789	3201.65	10.645	3223.48	11.556	3223.48	11.556	98.2792
FI-5	part 1	82	131.637	28015.7	4.1668	3.90618	0.854357	22.5117	1.13412	0.638019	0.744396	0.656363	3181.22	18.6912	3206.07	11.0263	3222.33	13.5037	3222.33	13.5037	98.7244
FI-5	part 1	83	192.763	47088.9	4.78525	3.86467	0.703312	23.1703	0.99684	0.65065	0.705084	0.707319	3230.74	17.9165	3234.12	9.70328	3236.89	11.1121	3236.89	11.1121	99.8101
FI-5	part 1	84	270.502	16397.9	2.98661	4.06975	0.770793	19.3624	1.65557	0.573648	1.4439	0.872143	2922.78	33.931	3060.05	15.9862	3152.14	12.8548	3152.14	12.8548	92.7238
FI-5	part 1	85	240.301	55527.3	2.57006	3.89238	0.826995	22.7948	1.17537	0.644616	0.834895	0.710328	3207.13	21.0954	3218.22	11.4334	3225.81	13.053	3225.81	13.053	99.4209
FI-5	part 1	86	295.993	36155.3	2.6103	3.94272	0.845454	21.9192	1.2546	0.628139	0.921282	0.734321	3142.23	22.9127	3180.15	12.1838	3204.85	13.4583	3204.85	13.4583	98.0459
FI-5	part 1	87	249.399	54252.1	2.64748	3.91155	0.767077	22.4623	1.40593	0.638359	1.17739	0.837445	3182.56	29.573	3203.94	13.6679	3218.02	12.1299	3218.02	12.1299	98.8982
FI-5	part 1	88	225.412	11592.2	2.5483	3.93111	0.853573	21.9276	1.42292	0.627389	1.0944	0.769127	3139.25	27.1984	3180.52	13.8187	3207.35	14.3687	3207.35	14.3687	97.877
FI-5	part 1	89	235.55	54236.9	2.05295	3.87603	0.766794	22.9072	1.20433	0.643559	0.925704	0.768649	3202.99	23.3666	3223.01	11.7175	3236.17	12.149	3236.17	12.149	98.9748
FI-5	part 1	90	250.763	59610.8	2.83019	3.88993	0.701257	22.5307	1.06066	0.635415	0.793801	0.748403	3170.97	19.882	3206.89	10.3124	3230.11	11.0995	3230.11	11.0995	98.169
FI-5	part 1	91	238.641	39572.1	2.6889	3.89009	0.665577	22.7063	1.11276	0.641493	0.889495	0.79936	3194.88	22.4087	3214.44	10.8226	3227.34	10.5517	3227.34	10.5517	98.9942
FI-5	part 1	92	233.602	47736.6	3.52459	3.88867	0.771743	22.2073	1.24567	0.6266	0.975589	0.783183	3136.13	24.2268	3192.84	12.1039	3229.34	12.2217	3229.34	12.2217	97.1137
FI-5	part 1	93	206.915	38480.3	3.63546	3.87961	0.7256	23.682	1.35539	0.66678	1.14108	0.841887	3293.43	29.4268	3255.4	13.2055	3232.72	11.5383	3232.72	11.5383	101.878
FI-5	part 1	94	279.493	49170.8	2.52381	3.89992	0.704302	22.1164	1.08656	0.626284	0.826797	0.760931	3134.88	20.5255	3188.85	10.5559	3223.67	11.1243	3223.67	11.1243	97.2456
FI-5	part 1	97	250.771	28064.6	3.32763	3.87691	0.768512	21.6527	1.25645	0.60992	0.987156	0.785673	3069.68	24.1087	3168.28	12.1951	3232.01	12.2623	3232.01	12.2623	94.9776
FI-5	part 1	99	254.591	55603.1	2.17934	3.94505	0.815392	22.0034	1.33127	0.630536	1.05109	0.789538	3151.71	26.2023	3183.88	12.9305	3204.9	12.9108	3204.9	12.9108	98.3404
FI-5	part 2	2	236.368	46944.5	1.8826	3.869	0.739044	23.0056	1.15689	0.650369	0.889192	0.768603	3229.65	22.5889	3227.18	11.258	3226.32	11.681	3226.32	11.681	100.103
FI-5	part 2	3	294.903	52563.9	2.13897	3.87829	0.770842	22.5175	1.20878	0.63813	0.929278	0.768773	3181.66	23.336	3206.32	11.7524	3222.46	12.1996	3222.46	12.1996	98.734
FI-5	part 2	4	288.35	49364.8	4.44398	3.90016	0.791485	22.4537	1.14701	0.639947	0.829715	0.723373	3188.81	20.8719	3203.56	11.1504	3213.49	12.5068	3213.49	12.5068	99.2318
FI-5	part 2	5	282.728	50328.5	2.5735	3.88245	0.71005	22.3713	0.95793	0.634692	0.641735	0.669918	3168.12	16.0621	3199.99	9.31075	3220.7	11.2248	3220.7	11.2248	98.3673
FI-5	part 2	7	144.125	29802.8	1.13803	3.19138	0.660557	30.5683	0.91374	0.713022	0.627518	0.686758	3469.84	16.8378	3505.26	8.98429	3526.23	10.2427	3526.23	10.2427	98.401
FI-5	part 2	8	283.143	47598.3	3.33154	3.88454	0.642362	22.4967	0.905335	0.636693	0.636271	0.702802	3176.01	15.956	3205.42	8.80161	3224.55	10.1664	3224.55	10.1664	98.4944
FI-5	part 2	10	201.065	36464.4	2.4538	3.87885	0.869055	22.6203	1.29547	0.639422	0.958314	0.73974	3186.74	24.0949	3210.75	12.5978	3226.45	13.7532	3226.45	13.7532	98.7693
FI-5	part 2	12	267.831	43585.5	2.45832	3.87964	0.804475	21.8455	1.16773	0.616153	0.843005	0.721916	3094.59	20.7184	3176.88	11.3384	3229.95	12.7497	3229.95	12.7497	95.8092
FI-5	part 2	13	295.996	43322.7	2.01972	3.88159	0.640995	22.2797	0.888681	0.628795	0.611351	0.68793	3144.82	15.2143	3196	8.63611	3228.96	10.1776	3228.96	10.1776	97.3942
FI-5	part 2	14	233.875	48010.1	3.40741	3.86349	0.944992	22.5094	1.3623	0.632251	0.980766	0.719932	3158.48	24.49	3205.97	13.245	3236.49	14.9106	3236.49	14.9106	97.5898
FI-5	part 2	15	126.213	25352.1	3.64207	3.86922	0.878002	22.8804	1.15265	0.644114	0.7444	0.645814	3205.17	18.7999	3221.87	11.2142	3232.96	13.8823	3232.96	13.8823	99.1404
FI-5	part 2	16	326.863	45038.6	2.87312	3.95477	0.814569	21.1389	1.17497	0.607844	0.84512	0.719272	3061.37	20.5962	3144.98	11.392	3199.47	12.9098	3199.47	12.9098	95.6834
FI-5	part 2	20	213.193	30921.3	2.74114	3.86963	0.804079	23.1954	1.16964	0.656389	0.843447	0.721114	3253.12	21.5465	3235.18	11.386	3224.75	12.7863	3224.75	12.7863	100.88
FI-5	part 2	21	138.211	27065.5	2.27527	3.85817	0.78021	23.1564	1.02624	0.653463	0.663965	0.64699	3241.72	16.9157	3233.54	9.9892	3229.14	12.3475	3229.14	12.3475	100.39
FI-5	part 2	22	241.278	47966.8	2.75242	3.86813	0.758728	22.9609	1.19797	0.6492	0.92666	0.773525	3225.08	23.515	3225.29	11.6568	3226.09	11.9783	3226.09	11.9783	99.9686
FI-5	part 2	23	281.686	39727.4	2.36466	3.88307	0.609498	22.0725	0.957623	0.62661	0.734955	0.767478	3136.17	18.2513	3186.92	9.30237	3219.7	9.68931	3219.7	9.68931	97.4055
FI-5	part 2	24	313.55	24660.8	2.4999	4.06094	0.839562	20.9327	1.21216	0.620268	0.868109	0.716168	3110.98	21.4233	3135.48	11.7474	3151.89	13.4267	3151.89	13.4267	98.7022
FI-5	part 2	25	290.027	60665.1	1.40034	3.86487	0.838753	23.3126	1.13821	0.656702	0.768841	0.675483	3254.34	19.6463	3240.08	11.0823	3231.95	13.2404	3231.95	13.2404	100.693
FI-5	part 2	26	224.917	40765	1.40096	3.88291	0.899608	23.1443	1.46508	0.655223	1.15324	0.787151	3248.58	29.4289	3233.03	14.261	3224.07	14.2591	3224.07	14.2591	100.76
FI-5	part 2	27	255.085	46230.3	2.98911	3.88365	0.676256	22.9307	1.13765	0.649224	0.913003	0.802536	3225.17	23.169	3224.01	11.0692	3223.96	10.7094	3223.96	10.7094	100.038
FI-5	part 2	28	231.034	48986.4	3.49355	3.86951	0.691981	23.7109	1.07643	0.666249	0.822206	0.763824	3291.38	21.1932	3256.58	10.488	3235.9	10.9567	3235.9	10.9567	101.715
FI-5	part 2	29	284.959	54600.9	2.59307	3.90614	0.872951	22.8849	1.32519	0.649083	0.994959	0.750806	3224.62	25.2455	3222.06	12.8931	3221.14	13.8157	3221.14	13.8157	100.108
FI-5	part 2	30	280.706	43900.7	2.99838	3.88596	0.861086	22.8194	1.23194	0.643999	0.879838	0.714191	3204.72	22.2181	3219.27	11.9843	3229.03	13.6067	3229.03	13.6067	99.247
FI-5	part 2	31	264.597	48039	2.47507	3.88254	0.715506	23.3855	1.02519	0.659336	0.73264	0.714636	3264.58	18.7665	3243.12	9.98308	3230.56	11.3144	3230.56	11.3144	101.053
FI-5	part 2	32	278.822	42468.3	2.80083	3.89245	0.831314	22.7275	1.30888	0.642497	1.00967	0.771399	3198.83	25.4604	3215.35	12.7307	3226.34	13.1408	3226.34	13.1408	99.147
FI-5	part 2	34	280.087	41091.5	4.64681	3.93745	0.668026	22.2965	0.955462	0.640099	0.678842	0.710485	3189.41	17.0791	3196.74	9.28542	3202.02	10.6315	3202.02	10.6315	99.6062
FI-5	part 2	35	110.762	22423.7	2.20462	3.88177	0.793666	23.3063	1.08299	0.660152	0.727644	0.671883	3267.75	18.6524	3239.82	10.5445	3223.25	12.658	3223.25	12.658	101.38
FI-5	part 2	36	272.612	47786	2.40323	3.93694	0.769643	22.3006	1.0961	0.640043	0.779358	0.711026	3189.19	19.607	3196.91	10.6524	3202.45	12.1817	3202.45	12.1817	99.5858
FI-5	part 2	37	166.209	29999.3	2.70544	3.87931	0.872762	23.5919	1.28996	0.667508	0.942693	0.730793	3296.25	24.3265	3251.68	12.566	3224.99	13.8938	3224.99	13.8938	102.21
FI-5	part 2	40	279.094	58937.4	3.4442	3.87928	0.693238	23.8523	1.13593	0.676082	0.8974	0.790012	3329.31	23.3351	3262.38	11.0704	3222.17	10.9903	3222.17	10.9903	103.325
FI-5	part 2	41	287.477	44557	1.85856	3.94483	0.789324	22.5846	1.19911	0.65113	0.898321	0.749159	3232.62	22.8369	3209.21	11.6598	3195.3	12.566	3195.3	12.566	101.168
FI-5	part 2	43	248.321	48194.1	2.24719	3.34525	0.736894	29.0733	1.06054	0.710618	0.761091	0.717645	3460.79	20.3816	3456	10.4108	3453.89	11.4498	3453.89	11.4498	100.2
FI-5	part 2	46	233.018	39470.6	3.2889	3.88749	0.790032	22.8379	1.16944	0.648354	0.85905	0.734583	3221.77	21.7821	3220.06	11.3766	3219.67	12.525	3219.67	12.525	100.065
FI-5	part 2	47	126.859	26313.7	2.81694	3.33968	0.706734	29.2681	0.970553	0.713951	0.662658	0.682764	3473.34	17.7942	3462.55	9.52952	3456.99	10.9908	3456.99	10.9908	100.473
FI-5	part 2	48	229.613	31754.9	3.61879	3.88045	0.651192	23.0171	1.08268	0.65242	0.862187	0.796349	3237.65	21.9446	3227.67	10.536	3222.14	10.3338	3222.14	10.3338	100.481
FI-5	part 2	49	283.077	50899.8	2.58374	3.88135	0.693422	23.0088	1.22148	0.652121	1.00454	0.822393	3236.49	25.5607	3227.31	11.8867	3222.29	10.9665	3222.29	10.9665	100.44
FI-5	part 2	50	251.535	47200.2	2.83345	3.89242	0.703359	22.7351	0.964535	0.646247	0.659475	0.683724	3213.52	16.6886	3215.67	9.38137	3217.69	11.1114	3217.69	11.1114	99.8706
FI-5	part 2	51	210.011	25984.2	2.25051	3.95615	0.879445	21.2728	2.12956	0.615051	1.93816	0.910121	3090.19	47.5817	3151.1	20.6552	3190.81	13.9649	3190.81	13.9649	96.8467
FI-5	part 2	52	284.559	29060.8	4.74164	3.87051	0.833345	21.9569	1.22058	0.620952	0.888271	0.727742	3113.71	21.9358	3181.82	11.8543	3225.73	13.2082	3225.73	13.2082	96.5271
FI-5	part 2	54	281.568	44401.6	3.9684	3.89527	1.09241	22.5119	1.76384	0.63848	1.38372	0.784497	3183.04	34.7599	3206.08	17.1496	3221.2	17.2655	3221.2	17.2655	98.8154
FI-5	part 2	55	309.884	54426.5	2.9094	3.88166	0.74338	22.3579	1.09498	0.631788	0.801432	0.731915	3156.66	20.003	3199.41	10.6426	3227	11.7753	3227	11.7753	97.8203
FI-5	part 2	56	260.245	18896.4	2.54568	3.87576	0.667998	23.1395	1.08588	0.651762	0.830983	0.765264	3235.08	21.1375	3232.83	10.5694	3232.1	11.0271	3232.1	11.0271	100.092
FI-5	part 2	58	159.004	32314.7	2.73848	3.88351	0.761002	22.8302	1.11475	0.642744	0.808779	0.725522	3199.79	20.3994	3219.73	10.8445	3232.85	12.1018	3232.85	12.1018	98.9775
FI-5	part 2	59	337.117	57086.5	2.26277	3.93128	0.72711	22.4532	1.35456	0.639563	1.14267	0.843572	3187.3	28.734	3203.54	13.1682	3214.4	11.4863	3214.4	11.4863	99.1569
FI-5	part 2	60	205.792	35891.7	4.62844	3.85977	0.726162	23.3185	1.11611	0.652386	0.84598	0.757975	3237.52	21.5314	3240.33	10.8672	3242.74	11.4749	3242.74	11.4749	99.839
FI-5	part 2	61	241.377	43448	2.93424	3.87739	0.703408	22.5982	1.05816	0.633569	0.789873	0.746459	3163.69	19.7485	3209.8	10.2894	3239.42	11.1014	3239.42	11.1014	97.6623
FI-5	part 2	62	268.101	50135.1	3.10493	3.88556	0.558335	22.492	0.913983	0.631841	0.718986	0.786651	3156.87	17.9461	3205.22	8.88561	3236.29	8.89889	3236.29	8.89889	97.5457
FI-5	part 2	64	202.07	37068.2	2.02016	3.87539	0.72364	22.9145	1.04076	0.641855	0.747282	0.718015	3196.3	18.8324	3223.32	10.1261	3240.85	11.4196	3240.85	11.4196	98.6256
FI-5	part 2	65	320.184	52992.3	2.87697	3.89907	0.765396	22.2493	1.29585	0.626829	1.04507	0.80647	3137.03	25.958	3194.68	12.5926	3231.75	12.0877	3231.75	12.0877	97.0692
FI-5	part 2	66	257.034	50324.1	2.27261	3.86018	0.72154	22.7141	1.01133	0.633559	0.706476	0.698565	3163.65	17.6632	3214.77	9.83611	3247.51	11.4017	3247.51	11.4017	97.4177
FI-5	part 2	68	274.422	50458.9	3.50097	3.89058	0.698818	22.7317	1.05952	0.639046	0.795383	0.750705	3185.26	19.9911	3215.53	10.3052	3235.13	11.0394	3235.13	11.0394	98.4585
FI-5	part 2	70	210.798	39406.1	3.39474	3.90365	0.729902	22.61	1.181	0.637909	0.92769	0.785512	3180.79	23.2912	3210.31	11.4843	3229.47	11.5322	3229.47	11.5322	98.4926
FI-5	part 2	71	235.866	41641.4	4.43288	3.88556	0.617766	22.9847	0.866491	0.645433	0.604547	0.697696	3210.34	15.2869	3226.29	8.43157	3236.9	9.78877	3236.9	9.78877	99.1792
FI-5	part 2	72	308.696	64310.2	2.52031	3.87728	0.662261	22.9178	0.981402	0.64196	0.722191	0.735876	3196.72	18.2019	3223.46	9.54864	3240.82	10.4757	3240.82	10.4757	98.6392
FI-5	part 2	73	219.15	34091.8	3.9769	3.86191	0.753314	23.1897	1.34563	0.64736	1.1144	0.828162	3217.88	28.2306	3234.94	13.0992	3246.2	11.8844	3246.2	11.8844	99.1276
FI-5	part 2	75	299.833	65449.1	2.5442	3.90906	0.669885	22.6791	1.06978	0.642043	0.833637	0.779261	3197.04	21.0124	3213.28	10.404	3224.1	10.5784	3224.1	10.5784	99.1609
FI-5	part 2	76	286.38	26510.9	1.84859	3.87202	0.70457	22.3548	1.0494	0.627442	0.771652	0.735323	3139.47	19.1783	3199.27	10.1996	3237.67	11.2144	3237.67	11.2144	96.9669
FI-5	part 2	77	92.5749	16937.8	1.34349	3.26339	0.734512	30.5251	0.942047	0.722298	0.578335	0.613913	3504.65	15.6353	3503.87	9.26222	3504.09	11.4924	3504.09	11.4924	100.016
FI-5	part 2	78	289.562	48710.9	4.11146	3.8677	0.695319	23.3114	1.2451	0.653805	1.03237	0.829145	3243.05	26.3099	3240.03	12.1231	3238.84	10.9746	3238.84	10.9746	100.13
FI-5	part 2	80	279.807	48642.6	2.19965	3.86922	0.738338	22.8942	1.14764	0.642361	0.878276	0.765292	3198.29	22.1443	3222.46	11.1657	3238.2	11.6478	3238.2	11.6478	98.7674
FI-5	part 2	81	282.253	48811.1	2.33559	3.96022	0.75691	23.0142	1.11134	0.660925	0.809388	0.728299	3270.75	20.7624	3227.54	10.8149	3201.48	12.0423	3201.48	12.0423	102.164
FI-5	part 2	83	137.576	17719.7	4.1582	3.95576	0.796906	22.5489	1.30641	0.648755	1.01777	0.779055	3223.34	25.8163	3207.67	12.7025	3198.58	12.9548	3198.58	12.9548	100.774
FI-5	part 2	84	160.675	4664.38	2.70127	3.84919	0.820713	23.1852	1.3071	0.653216	0.730887	0.559168	3240.76	18.6164	3234.75	12.7239	3231.7	17.0961	3231.7	17.0961	100.28
FI-5	part 2	85	313.463	67049.9	1.55434	3.33838	0.682357	30.0251	1.0461	0.727654	0.792666	0.757733	3524.67	21.5218	3487.64	10.2799	3467.09	10.5733	3467.09	10.5733	101.661
FI-5	part 2	86	280.834	49176.1	5.57874	3.87292	0.728328	23.0012	1.08502	0.646914	0.803523	0.740562	3216.14	20.3467	3226.99	10.5584	3234.42	11.5001	3234.42	11.5001	99.4346
FI-5	part 2	87	87.0375	17861.4	2.36237	3.86925	0.83396	24.6571	1.45935	0.693802	1.18609	0.812748	3397.1	31.3192	3294.74	14.2414	3233.71	13.4113	3233.71	13.4113	105.053
FI-5	part 2	88	212.178	46802.2	2.80289	3.89405	0.781847	23.4047	1.13457	0.66267	0.820032	0.722769	3277.51	21.0689	3243.92	11.0486	3223.9	12.3727	3223.9	12.3727	101.663
FI-5	part 2	90	246	43416.2	2.99298	3.8731	0.830256	23.4524	1.27509	0.661434	0.967128	0.758476	3272.72	24.8203	3245.9	12.4182	3230.05	13.1114	3230.05	13.1114	101.321
FI-5	part 2	91	215.864	49853.8	3.34484	3.86142	0.735996	23.4734	1.14406	0.662079	0.874277	0.764189	3275.23	22.4506	3246.78	11.1424	3229.93	11.643	3229.93	11.643	101.402
FI-5	part 2	92	188.085	30057.7	3.46118	3.86287	0.798869	23.5859	1.28578	0.666957	1.00558	0.782077	3294.11	25.9364	3251.43	12.5252	3225.89	12.642	3225.89	12.642	102.115
FI-5	part 2	93	219.927	41641.8	2.88055	3.88275	0.705505	23.2385	0.982184	0.660277	0.677779	0.690073	3268.23	17.3761	3236.98	9.56177	3218.35	11.2212	3218.35	11.2212	101.55
FI-5	part 2	94	198.26	38531	2.52826	3.86711	0.706248	23.221	1.26372	0.657123	1.04457	0.826587	3255.97	26.7024	3236.25	12.3024	3224.72	11.2219	3224.72	11.2219	100.969
FI-5	part 2	95	263.86	60250.4	2.98215	3.91228	0.744569	22.8289	1.18189	0.653334	0.916939	0.775823	3241.22	23.358	3219.68	11.4976	3206.97	11.782	3206.97	11.782	101.068
FI-5	part 2	96	257.62	48293.6	3.26199	3.87822	0.737668	22.6473	1.15257	0.642598	0.884927	0.767786	3199.22	22.317	3211.91	11.2086	3220.52	11.6553	3220.52	11.6553	99.3388
FI-5	part 2	97	196.212	34866.3	3.50279	3.86467	0.65958	23.1288	0.873831	0.654174	0.570442	0.652806	3244.49	14.5426	3232.38	8.5052	3225.54	10.4482	3225.54	10.4482	100.588
FI-5	part 2	98	233.089	4956.09	1.88073	3.3339	0.81247	28.724	1.26664	0.70465	0.748051	0.590579	3438.26	19.9337	3444.13	12.4292	3448.22	15.8551	3448.22	15.8551	99.7112
FI-5	part 2	100	326.351	30542.2	1.90295	3.96401	0.829233	22.2431	1.49675	0.645826	1.24296	0.830442	3211.88	31.442	3194.4	14.5448	3184.13	13.2042	3184.13	13.2042	100.872
FUI-1	Part 1	1	418.358	10500.2	2.43411	3.4834	0.68279	25.3061	0.923995	0.644892	0.555721	0.601433	3208.22	14.0451	3320.1	9.02568	3389.03	11.4994	3389.03	11.4994	94.6649
FUI-1	Part 1	2	448.886	156582	2.15194	3.73639	0.594027	24.0187	0.828586	0.654482	0.57752	0.696995	3245.69	14.7272	3269.15	8.07721	3284.24	9.33537	3284.24	9.33537	98.8264
FUI-1	Part 1	10	254.131	94389.3	2.13148	3.37298	0.580385	28.4593	0.814333	0.700069	0.571123	0.701339	3420.91	15.1608	3435.05	7.98808	3443.98	9.01018	3443.98	9.01018	99.3303
FUI-1	Part 1	11	446.574	86919.3	2.03338	3.73363	0.959654	24.351	1.35525	0.66244	0.956768	0.705974	3276.62	24.5769	3282.55	13.2189	3286.84	15.0725	3286.84	15.0725	99.6893
FUI-1	Part 1	13	456.971	136355	2.14132	3.73502	0.585638	24.0328	0.820106	0.653798	0.573795	0.699659	3243.02	14.623	3269.73	7.99473	3286.81	9.20442	3286.81	9.20442	98.6678
FUI-1	Part 1	14	425.338	11932.8	2.78009	3.46535	0.558561	24.1875	0.778783	0.612156	0.538932	0.692019	3078.63	13.1919	3275.98	7.59382	3399.75	8.74978	3399.75	8.74978	90.5546
FUI-1	Part 1	15	443.395	22190.6	0.836521	3.78045	0.525465	22.6387	0.733577	0.624308	0.508093	0.692624	3127.04	12.589	3211.54	7.13363	3265.43	8.32478	3265.43	8.32478	95.762
FUI-1	Part 1	16	212.595	70672.5	1.27641	3.78365	0.609636	23.342	0.85981	0.64345	0.606125	0.704952	3202.56	15.2982	3241.31	8.3719	3266.05	9.58884	3266.05	9.58884	98.0562
FUI-1	Part 1	17	271.394	59979.7	1.28354	3.78007	0.622213	22.8426	0.864957	0.629152	0.599744	0.69338	3146.23	14.9307	3220.26	8.41446	3267.37	9.79937	3267.37	9.79937	96.2924
FUI-1	Part 1	21	178.656	13871.3	1.29245	3.7832	0.590156	23.9363	0.835771	0.660366	0.555352	0.664478	3268.58	14.2386	3265.8	8.14613	3264.78	9.82186	3264.78	9.82186	100.116
FUI-1	Part 1	24	357.741	10674.2	2.79777	3.44523	0.649551	29.3825	0.8776	0.737229	0.582839	0.664129	3560.3	15.9446	3466.38	8.61792	3413.21	10.2085	3413.21	10.2085	104.309
FUI-1	Part 1	25	284.626	12293.2	2.01086	3.4267	0.520074	25.0086	0.737981	0.623942	0.512059	0.693864	3125.59	12.6827	3308.55	7.20535	3422.02	8.26276	3422.02	8.26276	91.3375
FUI-1	Part 1	27	371.202	19844.5	1.80539	3.72856	0.493723	21.9477	0.717061	0.595303	0.481888	0.672031	3010.89	11.592	3181.41	6.96375	3291.47	8.33813	3291.47	8.33813	91.4755
FUI-1	Part 1	28	271.231	15416.4	2.39381	3.42976	0.638262	26.384	0.884969	0.658824	0.577883	0.652998	3262.59	14.7955	3360.88	8.65789	3420.68	10.4222	3420.68	10.4222	95.3783
FUI-1	Part 1	29	556.959	21686.2	2.27199	3.75373	0.626771	22.41	0.875756	0.611844	0.60849	0.694816	3077.38	14.8898	3201.67	8.51263	3281.16	9.8929	3281.16	9.8929	93.7895
FUI-1	Part 1	30	502.267	69382.7	2.19763	3.73813	0.607083	24.0124	0.858027	0.652038	0.605856	0.706104	3236.16	15.4149	3268.89	8.36413	3289.7	9.54196	3289.7	9.54196	98.3725
FUI-1	Part 1	31	580.896	117921	2.45555	3.73739	0.642523	23.8347	0.904355	0.646937	0.636071	0.703343	3216.23	16.1068	3261.65	8.81314	3290.37	10.0956	3290.37	10.0956	97.7466
FUI-1	Part 1	32	582.979	36636.8	1.67036	3.79924	0.586296	22.3002	0.842372	0.615777	0.604681	0.717832	3093.09	14.8555	3196.89	8.18638	3263.37	9.22851	3263.37	9.22851	94.7822
FUI-1	Part 1	33	288.347	89151.6	2.76195	3.7382	0.63917	24.0976	0.896936	0.653583	0.628551	0.700776	3242.19	16.0153	3272.35	8.74468	3291.55	10.0474	3291.55	10.0474	98.5002
FUI-1	Part 1	36	515.551	46644.8	2.35334	3.77647	0.615172	23.5538	0.867957	0.644816	0.60869	0.70129	3207.92	15.3827	3250.1	8.45436	3276.9	9.72164	3276.9	9.72164	97.8948
FUI-1	Part 1	44	216.929	78816.5	1.35126	3.3984	0.680908	28.4073	0.959684	0.698922	0.675329	0.703699	3416.56	17.9098	3433.26	9.41338	3443.68	10.584	3443.68	10.584	99.2124
FUI-1	Part 1	46	586.764	15715.9	1.04604	3.52727	0.678314	27.5769	0.908841	0.70706	0.587574	0.646509	3447.36	15.6888	3404.17	8.90552	3379.52	10.8141	3379.52	10.8141	102.007
FUI-1	Part 1	50	338.266	106157	2.75529	3.73612	0.504256	24.0706	0.712979	0.653861	0.503489	0.706177	3243.27	12.832	3271.26	6.95081	3289.12	7.92843	3289.12	7.92843	98.606
[truncated: 2,300 more rows]
